# Supplementary material for: Plant Growth Benefits by the Coalition Function of Plant Microbiome
Source: Research Square preprint supplement (doi:10.21203/rs.3.rs-7560912/v1), 2026-01-19
Supplement: Supplementary file 1 [file 036ccf48f4e0f5a31e6f395d.xlsx]

## Sheet: Table_S1
Table S1. List of genomes included in the pangenome analysis
Assembly Accession	Organism Name	Infraspecific Name	Genome size	GC ratio (%)
GCF_004151235.1	Flavobacterium anhuiense	RCM74	5.3 Mb	34
GCF_001404985.1	Flavobacterium aquidurense	RC62	5.3 Mb	33.5
GCF_004151245.1	Flavobacterium beibuense	RSKm HC5	3.7 Mb	38
GCF_900108395.1	Flavobacterium marinum (Paenimyroides marinum)	CGMCC 1.10825	3 Mb	35.5
GCF_003865405.1	Flavobacterium tangerinum (Paenimyroides tangerinum)	YIM 102701-2	3.5 Mb	31
GCF_900115115.1	Flavobacterium ummariense (Paenimyroides ummariense)	DS-12	3.5 Mb	34.5
GCF_003858535.1	Flavobacterium viscosus (Paenimyroides viscosum)	YIM 102796	3 Mb	34
GCF_024628805.1	Flavobacterium aestuarii (Paenimyroides aestuarii)	SCSIO 72103	3 Mb	35
GCF_008629655.1	Flavobacterium baculatum (Paenimyroides baculatum)	SNL9	3.3 Mb	34.5
GCF_030409925.1	Flavobacterium ceti (Paenimyroides ceti)	CECT 7184	5.3 Mb	36
GCF_001404975.1	Flavobacterium daejeonense	RCH33	3.8 Mb	35
GCF_021608185.1	Flavobacterium anseongense	AS60	3.1 Mb	35.5
GCF_004151275.2	Flavobacterium dauae	TCH3-2	2.9 Mb	34.5

## Sheet: Table_S2
Table S2. The eggNOG annotation of the 622 genes specific to TCH3-2 from the pangenome analysis.
#query	seed_ortholog	evalue	score	eggNOG_OGs	max_annot_lvl	COG_category	Description	Preferred_name	GOs	EC	KEGG_ko	KEGG_Pathway	KEGG_Module	KEGG_Reaction	KEGG_rclass	BRITE	KEGG_TC	CAZy	BiGG_Reaction	PFAMs
WP_129757009.1	880071.Fleli_3718	2.54e-22	96.3	2DR9C@1|root,33AS0@2|Bacteria,4NXRC@976|Bacteroidetes,47WES@768503|Cytophagia	976|Bacteroidetes	-	-	-	-	-	-	-	-	-	-	-	-	-	-	-
WP_129757003.1	172045.KS04_12110	2.33e-64	199	2E6SR@1|root,331CS@2|Bacteria,4NWSP@976|Bacteroidetes	976|Bacteroidetes	-	-	-	-	-	-	-	-	-	-	-	-	-	-	-
WP_129757002.1	172045.KS04_13755	1.98e-134	387	COG4977@1|root,COG4977@2|Bacteria,4NHTS@976|Bacteroidetes,1HY2K@117743|Flavobacteriia,34PHF@308865|Elizabethkingia	976|Bacteroidetes	K	AraC-like ligand binding domain	-	-	-	-	-	-	-	-	-	-	-	-	AraC_binding,HTH_18
WP_129757734.1	236814.IX39_18980	8.87e-75	249	2DBC9@1|root,2Z8CA@2|Bacteria,4NJS4@976|Bacteroidetes,1HYBG@117743|Flavobacteriia,3ZPWI@59732|Chryseobacterium	976|Bacteroidetes	S	Beta-carotene 15,15'-monooxygenase	-	-	-	-	-	-	-	-	-	-	-	-	DUF4173
WP_129757730.1	1506583.JQJY01000004_gene2627	2.96e-46	157	COG3758@1|root,COG3758@2|Bacteria,4NTC4@976|Bacteroidetes,1I6UV@117743|Flavobacteriia,2NYH7@237|Flavobacterium	976|Bacteroidetes	S	HutD	-	-	-	-	-	-	-	-	-	-	-	-	HutD
WP_129757707.1	1392490.JHZX01000001_gene3227	3.78e-94	304	COG1572@1|root,COG1572@2|Bacteria,4NIIN@976|Bacteroidetes,1HY0X@117743|Flavobacteriia	976|Bacteroidetes	DZ	C-terminal domain of CHU protein family	-	-	-	-	-	-	-	-	-	-	-	-	CARDB,CHU_C
WP_129758386.1	1358423.N180_01560	8.55e-288	797	COG0025@1|root,COG0025@2|Bacteria,4NFHG@976|Bacteroidetes,1IQDF@117747|Sphingobacteriia	976|Bacteroidetes	P	Sodium/hydrogen exchanger family	-	-	-	ko:K03316	-	-	-	-	ko00000	2.A.36	-	-	Na_H_Exchanger
WP_129758387.1	1121899.Q764_14300	9.23e-269	738	COG3328@1|root,COG3328@2|Bacteria,4NFQS@976|Bacteroidetes,1HZYN@117743|Flavobacteriia,2NTPJ@237|Flavobacterium	976|Bacteroidetes	L	Transposase, Mutator family	-	-	-	-	-	-	-	-	-	-	-	-	Transposase_mut
WP_235828701.1	1461577.CCMH01000013_gene708	1.71e-148	439	COG2244@1|root,COG2244@2|Bacteria,4NEGZ@976|Bacteroidetes,1HZ0M@117743|Flavobacteriia	976|Bacteroidetes	S	Psort location CytoplasmicMembrane, score 10.00	-	-	-	-	-	-	-	-	-	-	-	-	MatE,Polysacc_synt
WP_129758404.1	469617.FUAG_01558	4.42e-53	180	COG0463@1|root,COG0463@2|Bacteria,37CAH@32066|Fusobacteria	32066|Fusobacteria	M	Glycosyltransferase like family 2	-	-	-	-	-	-	-	-	-	-	-	-	Glycos_transf_2
WP_129758405.1	56110.Oscil6304_1700	1.08e-14	83.6	2DV72@1|root,33UF1@2|Bacteria,1GDJA@1117|Cyanobacteria	1117|Cyanobacteria	-	-	-	-	-	-	-	-	-	-	-	-	-	-	-
WP_129758406.1	1238450.VIBNISOn1_480058	3.58e-35	141	2DSMZ@1|root,33GQV@2|Bacteria,1P6NA@1224|Proteobacteria	1224|Proteobacteria	-	-	-	-	-	-	-	-	-	-	-	-	-	-	-
WP_129758409.1	391598.FBBAL38_02575	6.35e-109	317	COG2148@1|root,COG2148@2|Bacteria,4NF29@976|Bacteroidetes,1HWQ3@117743|Flavobacteriia	976|Bacteroidetes	M	Transferase	wcgN	-	2.7.8.36	ko:K15915	-	-	R10184	RC00002	ko00000,ko01000	-	-	-	Bac_transf
WP_129758410.1	1008457.BAEX01000003_gene1090	3.33e-99	293	COG0110@1|root,COG0110@2|Bacteria,4NNTF@976|Bacteroidetes,1IENR@117743|Flavobacteriia,47IMD@76831|Myroides	976|Bacteroidetes	S	Bacterial transferase hexapeptide (six repeats)	-	-	-	-	-	-	-	-	-	-	-	-	Hexapep,Hexapep_2
WP_129758411.1	1122931.AUAE01000003_gene386	9.03e-91	276	COG1218@1|root,COG1218@2|Bacteria,4NFHY@976|Bacteroidetes,2FP00@200643|Bacteroidia,22X12@171551|Porphyromonadaceae	976|Bacteroidetes	P	Inositol monophosphatase family	cysQ	-	3.1.3.7	ko:K01082	ko00920,ko01100,ko01120,ko01130,map00920,map01100,map01120,map01130	-	R00188,R00508	RC00078	ko00000,ko00001,ko01000,ko03016	-	-	-	Inositol_P
WP_129758412.1	1392490.JHZX01000001_gene1620	5e-83	247	COG3205@1|root,COG3205@2|Bacteria,4NV6E@976|Bacteroidetes,1I208@117743|Flavobacteriia	976|Bacteroidetes	S	membrane	-	-	-	-	-	-	-	-	-	-	-	-	DUF2061
WP_129758413.1	1123035.ARLA01000028_gene2226	5.82e-94	279	COG0529@1|root,COG0529@2|Bacteria,4NGCU@976|Bacteroidetes,1I20M@117743|Flavobacteriia,4C3K8@83612|Psychroflexus	976|Bacteroidetes	F	Catalyzes the synthesis of activated sulfate	cysC	GO:0003674,GO:0003824,GO:0004020,GO:0006793,GO:0006796,GO:0008150,GO:0008152,GO:0009987,GO:0016301,GO:0016310,GO:0016740,GO:0016772,GO:0016773,GO:0044237	2.7.1.25	ko:K00860	ko00230,ko00920,ko01100,ko01120,map00230,map00920,map01100,map01120	M00176	R00509,R04928	RC00002,RC00078	ko00000,ko00001,ko00002,ko01000	-	-	-	APS_kinase
WP_129758414.1	313596.RB2501_13299	2.89e-198	551	COG0175@1|root,COG0175@2|Bacteria,4NEPD@976|Bacteroidetes,1HXPZ@117743|Flavobacteriia	976|Bacteroidetes	EH	sulfate adenylyltransferase	-	-	2.7.7.4	ko:K00957	ko00230,ko00261,ko00450,ko00920,ko01100,ko01120,ko01130,map00230,map00261,map00450,map00920,map01100,map01120,map01130	M00176,M00596	R00529,R04929	RC02809,RC02889	ko00000,ko00001,ko00002,ko01000	-	-	-	PAPS_reduct
WP_129758415.1	1286632.P278_15270	7.61e-249	689	COG2895@1|root,COG2895@2|Bacteria,4NETI@976|Bacteroidetes,1HXRK@117743|Flavobacteriia	976|Bacteroidetes	P	Belongs to the TRAFAC class translation factor GTPase superfamily. Classic translation factor GTPase family. CysN NodQ subfamily	cysN	-	2.7.1.25,2.7.7.4	ko:K00955,ko:K00956	ko00230,ko00261,ko00450,ko00920,ko01100,ko01120,ko01130,map00230,map00261,map00450,map00920,map01100,map01120,map01130	M00176,M00596	R00509,R00529,R04928,R04929	RC00002,RC00078,RC02809,RC02889	ko00000,ko00001,ko00002,ko01000	-	-	-	GTP_EFTU
WP_129758786.1	1267211.KI669560_gene2581	3.96e-57	181	COG2764@1|root,COG2764@2|Bacteria,4NQD7@976|Bacteroidetes,1IS68@117747|Sphingobacteriia	976|Bacteroidetes	S	Glyoxalase bleomycin resistance protein dioxygenase	-	-	-	ko:K04750	-	-	-	-	ko00000	-	-	-	3-dmu-9_3-mt,Glyoxalase
WP_129758787.1	421072.IO89_10915	1.84e-34	119	COG1396@1|root,COG1396@2|Bacteria,4NUWA@976|Bacteroidetes,1I5RZ@117743|Flavobacteriia	976|Bacteroidetes	K	sequence-specific DNA binding	-	-	-	-	-	-	-	-	-	-	-	-	HTH_3
WP_129758788.1	1121887.AUDK01000006_gene2985	1.34e-22	97.1	COG3950@1|root,COG3950@2|Bacteria,4PMWX@976|Bacteroidetes,1I3IM@117743|Flavobacteriia,2NXR5@237|Flavobacterium	976|Bacteroidetes	S	AAA domain, putative AbiEii toxin, Type IV TA system	-	-	-	-	-	-	-	-	-	-	-	-	AAA_15,AAA_21
WP_129758789.1	1121887.AUDK01000006_gene2988	1.36e-108	329	COG0286@1|root,COG0286@2|Bacteria,4NG0E@976|Bacteroidetes,1HYSD@117743|Flavobacteriia,2P07K@237|Flavobacterium	976|Bacteroidetes	V	HsdM N-terminal domain	-	-	2.1.1.72	ko:K03427	-	-	-	-	ko00000,ko01000,ko02048	-	-	-	HsdM_N,N6_Mtase
WP_129758792.1	1131812.JQMS01000001_gene2245	3.77e-66	209	COG2135@1|root,COG2135@2|Bacteria,4NI3T@976|Bacteroidetes,1HWW1@117743|Flavobacteriia,2NW7H@237|Flavobacterium	976|Bacteroidetes	S	Belongs to the SOS response-associated peptidase family	yoqW	-	-	-	-	-	-	-	-	-	-	-	SRAP
WP_235828729.1	1218103.CIN01S_07_00610	8.94e-44	145	2DM5N@1|root,31TGW@2|Bacteria,4PKNS@976|Bacteroidetes,1I4D7@117743|Flavobacteriia,3ZSCT@59732|Chryseobacterium	976|Bacteroidetes	-	-	-	-	-	-	-	-	-	-	-	-	-	-	-
WP_129758799.1	1123035.ARLA01000026_gene155	3.02e-67	207	2C2UE@1|root,344KY@2|Bacteria,4P58A@976|Bacteroidetes,1IA1Y@117743|Flavobacteriia	976|Bacteroidetes	-	-	-	-	-	-	-	-	-	-	-	-	-	-	-
WP_129758800.1	1123035.ARLA01000026_gene154	1.04e-86	260	COG3600@1|root,COG3600@2|Bacteria,4NY0F@976|Bacteroidetes,1I9FK@117743|Flavobacteriia	976|Bacteroidetes	S	Protein of unknown function (DUF4065)	-	-	-	-	-	-	-	-	-	-	-	-	DUF4065
WP_129758801.1	1121373.KB903630_gene314	1.15e-118	345	COG4420@1|root,COG4420@2|Bacteria,4NH74@976|Bacteroidetes,47QZA@768503|Cytophagia	976|Bacteroidetes	S	Protein of unknown function (DUF1003)	-	-	-	-	-	-	-	-	-	-	-	-	DUF1003
WP_129758806.1	1233951.IO90_01135	1.96e-170	489	COG1373@1|root,COG1373@2|Bacteria,4NG8U@976|Bacteroidetes,1IIU1@117743|Flavobacteriia	976|Bacteroidetes	S	Domain of unknown function (DUF4143)	-	-	-	ko:K07133	-	-	-	-	ko00000	-	-	-	AAA_14,DUF4143
WP_129758825.1	1453505.JASY01000034_gene3829	2.6e-243	683	COG0793@1|root,COG0793@2|Bacteria,4NJAA@976|Bacteroidetes,1I1MJ@117743|Flavobacteriia,2P061@237|Flavobacterium	976|Bacteroidetes	M	Peptidase family S41	-	-	-	-	-	-	-	-	-	-	-	-	Peptidase_S41
WP_165352962.1	1121889.AUDM01000005_gene1668	3.34e-07	52.4	COG1404@1|root,COG1404@2|Bacteria,4NF1M@976|Bacteroidetes,1I0IG@117743|Flavobacteriia,2NX7A@237|Flavobacterium	976|Bacteroidetes	O	Subtilase family	-	-	-	-	-	-	-	-	-	-	-	-	Peptidase_S8,SPOR
WP_129757855.1	746697.Aeqsu_0976	2.37e-15	80.5	COG3187@1|root,COG3187@2|Bacteria	2|Bacteria	O	response to heat	-	-	-	ko:K03668	-	-	-	-	ko00000	-	-	-	META
WP_129756512.1	172045.KS04_19125	3.04e-209	594	2CI0Q@1|root,2Z86V@2|Bacteria,4NEAY@976|Bacteroidetes,1HX3J@117743|Flavobacteriia	976|Bacteroidetes	S	Protein of unknown function (DUF4099)	-	-	-	-	-	-	-	-	-	-	-	-	DUF3945,DUF4099
WP_129756510.1	525373.HMPREF0766_12666	6.17e-165	465	2DBHT@1|root,2Z9CP@2|Bacteria,4NHN7@976|Bacteroidetes,1J15X@117747|Sphingobacteriia	976|Bacteroidetes	S	Tetracycline regulation of excision, RteC	-	-	-	-	-	-	-	-	-	-	-	-	RteC
WP_129756490.1	1121897.AUGO01000007_gene265	4.24e-124	358	COG2102@1|root,COG2102@2|Bacteria,4NFQ4@976|Bacteroidetes,1HYJK@117743|Flavobacteriia,2NSMJ@237|Flavobacterium	976|Bacteroidetes	S	ATP-binding	-	-	-	-	-	-	-	-	-	-	-	-	Diphthami_syn_2
WP_129756489.1	1131730.BAVI_00750	5e-25	96.3	COG3708@1|root,COG3708@2|Bacteria,1VJT1@1239|Firmicutes,4HREN@91061|Bacilli,1ZRAV@1386|Bacillus	91061|Bacilli	K	Putative zinc ribbon domain	-	-	-	-	-	-	-	-	-	-	-	-	Zn_ribbon_2
WP_207209390.1	1121930.AQXG01000001_gene1237	6.33e-61	191	COG3832@1|root,COG3832@2|Bacteria,4NQ4A@976|Bacteroidetes,1ISRX@117747|Sphingobacteriia	976|Bacteroidetes	S	Activator of Hsp90 ATPase	-	-	-	-	-	-	-	-	-	-	-	-	AHSA1
WP_129756480.1	1450525.JATV01000004_gene260	3.57e-32	115	COG2149@1|root,COG2149@2|Bacteria,4NW0X@976|Bacteroidetes,1ID2S@117743|Flavobacteriia,2NX2P@237|Flavobacterium	976|Bacteroidetes	S	Domain of unknown function (DUF202)	-	-	-	ko:K00389	-	-	-	-	ko00000	-	-	-	DUF202
WP_129756453.1	421072.IO89_14495	4.22e-25	99.8	2E82K@1|root,332GK@2|Bacteria,4NWMQ@976|Bacteroidetes,1IA1V@117743|Flavobacteriia,3HJ31@358033|Chryseobacterium	976|Bacteroidetes	-	-	-	-	-	-	-	-	-	-	-	-	-	-	-
WP_129756442.1	991.IW20_04175	5.89e-35	122	2E3E7@1|root,32YDA@2|Bacteria,4NVF6@976|Bacteroidetes,1IHPJ@117743|Flavobacteriia,2NWNF@237|Flavobacterium	976|Bacteroidetes	S	Domain of Unknown Function with PDB structure (DUF3861)	-	-	-	-	-	-	-	-	-	-	-	-	DUF3861
WP_129756918.1	525373.HMPREF0766_10007	6.21e-70	216	292K5@1|root,2ZQ43@2|Bacteria,4NPMT@976|Bacteroidetes,1IYQ4@117747|Sphingobacteriia	976|Bacteroidetes	-	-	-	-	-	-	-	-	-	-	-	-	-	-	-
WP_129756921.1	525257.HMPREF0204_10604	0.000129	45.8	28XUW@1|root,2ZJR9@2|Bacteria,4P88E@976|Bacteroidetes,1IBFI@117743|Flavobacteriia	976|Bacteroidetes	-	-	-	-	-	-	-	-	-	-	-	-	-	-	-
WP_129756930.1	1121898.Q766_20655	5.72e-20	94.7	2EK5E@1|root,33DVV@2|Bacteria,4PFHP@976|Bacteroidetes,1I8KT@117743|Flavobacteriia	976|Bacteroidetes	-	-	-	-	-	-	-	-	-	-	-	-	-	-	-
WP_129756938.1	1406840.Q763_03835	1.43e-68	210	COG3727@1|root,COG3727@2|Bacteria,4NQEH@976|Bacteroidetes,1I1D1@117743|Flavobacteriia,2NWQQ@237|Flavobacterium	976|Bacteroidetes	L	May nick specific sequences that contain T G mispairs resulting from m5C-deamination	vsr	-	-	ko:K07458	-	-	-	-	ko00000,ko01000,ko03400	-	-	-	DUF559,Vsr
WP_129756939.1	29495.EA26_10055	1.07e-20	102	2ETHH@1|root,33M1E@2|Bacteria,1NTGJ@1224|Proteobacteria,1SW4R@1236|Gammaproteobacteria	1236|Gammaproteobacteria	-	-	-	-	-	-	-	-	-	-	-	-	-	-	-
WP_129756940.1	29495.EA26_10060	1.95e-151	464	COG0323@1|root,COG4191@1|root,COG0323@2|Bacteria,COG4191@2|Bacteria,1ND4X@1224|Proteobacteria,1RQA7@1236|Gammaproteobacteria,1XUMA@135623|Vibrionales	135623|Vibrionales	T	Histidine kinase-, DNA gyrase B-, and HSP90-like ATPase	-	-	-	-	-	-	-	-	-	-	-	-	HATPase_c,HATPase_c_3
WP_129756941.1	313590.MED134_01595	8.96e-166	478	COG0270@1|root,COG0270@2|Bacteria,4NG9A@976|Bacteroidetes,1HXY1@117743|Flavobacteriia,37FS8@326319|Dokdonia	976|Bacteroidetes	L	C-5 cytosine-specific DNA methylase	dcm	-	2.1.1.37	ko:K00558	ko00270,ko01100,ko05206,map00270,map01100,map05206	M00035	R04858	RC00003,RC00332	ko00000,ko00001,ko00002,ko01000,ko02048,ko03032,ko03036	-	-	-	DNA_methylase
WP_129756942.1	226186.BT_4753	6.21e-23	89.7	COG3655@1|root,COG3655@2|Bacteria,4NVSP@976|Bacteroidetes	976|Bacteroidetes	K	Cro/C1-type HTH DNA-binding domain	-	-	-	ko:K07727	-	-	-	-	ko00000,ko03000	-	-	-	HTH_26
WP_129756943.1	525373.HMPREF0766_12601	5.44e-103	300	28PKB@1|root,2ZC9T@2|Bacteria,4NMDP@976|Bacteroidetes	976|Bacteroidetes	-	-	-	-	-	-	-	-	-	-	-	-	-	-	-
WP_129756944.1	525373.HMPREF0766_12602	2.49e-176	498	28HIT@1|root,2Z7U6@2|Bacteria,4NEWV@976|Bacteroidetes	976|Bacteroidetes	-	-	-	-	-	-	-	-	-	-	-	-	-	-	-
WP_235828631.1	1216967.L100_12558	4.29e-187	529	COG0665@1|root,COG0665@2|Bacteria,4NFT6@976|Bacteroidetes,1HXMF@117743|Flavobacteriia,34QGH@308865|Elizabethkingia	976|Bacteroidetes	E	FAD dependent oxidoreductase	-	-	-	-	-	-	-	-	-	-	-	-	DAO
WP_129756948.1	1550091.JROE01000002_gene1090	0	1134	COG0693@1|root,COG0753@1|root,COG0693@2|Bacteria,COG0753@2|Bacteria,4NFQX@976|Bacteroidetes,1IQS5@117747|Sphingobacteriia	976|Bacteroidetes	C	Serves to protect cells from the toxic effects of hydrogen peroxide	katE	-	1.11.1.6	ko:K03781	ko00380,ko00630,ko01110,ko01130,ko01200,ko04011,ko04016,ko04068,ko04146,ko04211,ko04212,ko04213,ko05014,map00380,map00630,map01110,map01130,map01200,map04011,map04016,map04068,map04146,map04211,map04212,map04213,map05014	M00532	R00009,R00602,R02670	RC00034,RC00767,RC02141,RC02755	ko00000,ko00001,ko00002,ko01000	-	-	-	Catalase,Catalase-rel,DJ-1_PfpI
WP_129756949.1	1229276.DI53_2471	3.6e-142	411	COG0031@1|root,COG0031@2|Bacteria,4NFDI@976|Bacteroidetes,1IXPE@117747|Sphingobacteriia	976|Bacteroidetes	E	Pyridoxal-phosphate dependent enzyme	-	-	2.5.1.140	ko:K21949	-	-	R11705	-	ko00000,ko01000	-	-	-	NAD_binding_9,PALP
WP_129756950.1	1229276.DI53_2470	8.69e-159	476	COG4529@1|root,COG4529@2|Bacteria,4PKUZ@976|Bacteroidetes	976|Bacteroidetes	S	FAD-NAD(P)-binding	-	-	-	-	-	-	-	-	-	-	-	-	NAD_binding_9
WP_129756951.1	1229276.DI53_2469	4.35e-187	537	COG0019@1|root,COG0019@2|Bacteria,4NGQF@976|Bacteroidetes	976|Bacteroidetes	E	Pyridoxal-dependent decarboxylase, pyridoxal binding domain	-	-	4.1.1.20	ko:K01586	ko00300,ko01100,ko01110,ko01120,ko01130,ko01230,map00300,map01100,map01110,map01120,map01130,map01230	M00016,M00525,M00526,M00527	R00451	RC00299	ko00000,ko00001,ko00002,ko01000	-	-	-	Orn_Arg_deC_N,Orn_DAP_Arg_deC
WP_129756952.1	1500281.JQKZ01000005_gene4060	7.65e-124	375	COG1680@1|root,COG1680@2|Bacteria,4NI1Z@976|Bacteroidetes,1HYQF@117743|Flavobacteriia,3ZREM@59732|Chryseobacterium	976|Bacteroidetes	V	Beta-lactamase	-	-	-	-	-	-	-	-	-	-	-	-	Beta-lactamase,DUF3471
WP_129756953.1	555500.I215_15220	4.99e-106	308	COG3040@1|root,COG3040@2|Bacteria,4NNFA@976|Bacteroidetes,1I2GH@117743|Flavobacteriia	976|Bacteroidetes	M	lipocalin	-	-	-	ko:K03098	-	-	-	-	ko00000,ko04147	-	-	-	Lipocalin_2
WP_129756954.1	236814.IX39_13935	2.7e-27	119	COG3577@1|root,COG3577@2|Bacteria	2|Bacteria	S	aspartic-type endopeptidase activity	-	-	-	ko:K06985	ko04112,map04112	-	-	-	ko00000,ko00001	-	-	-	Asp_protease_2,gag-asp_proteas
WP_129756956.1	1121898.Q766_07770	7.89e-92	304	COG1520@1|root,COG1520@2|Bacteria,4NRYC@976|Bacteroidetes,1I3IV@117743|Flavobacteriia,2NSFE@237|Flavobacterium	976|Bacteroidetes	S	Part of the outer membrane protein assembly complex, which is involved in assembly and insertion of beta-barrel proteins into the outer membrane	-	-	-	-	-	-	-	-	-	-	-	-	-
WP_129756957.1	929704.Myrod_2723	0	2065	COG3291@1|root,COG3291@2|Bacteria,4NFRR@976|Bacteroidetes,1I0VP@117743|Flavobacteriia	976|Bacteroidetes	S	PKD domain	-	-	-	-	-	-	-	-	-	-	-	-	Beta_helix,NosD,PKD
WP_129756961.1	1358423.N180_06705	1.45e-78	242	COG2197@1|root,COG2197@2|Bacteria,4NJW3@976|Bacteroidetes	976|Bacteroidetes	T	Response regulator containing a CheY-like receiver domain and an HTH DNA-binding domain	-	-	-	-	-	-	-	-	-	-	-	-	GerE,Response_reg
WP_129756962.1	1358423.N180_06710	3.16e-84	259	COG4585@1|root,COG4585@2|Bacteria,4NN4R@976|Bacteroidetes,1J05T@117747|Sphingobacteriia	976|Bacteroidetes	T	Histidine kinase-, DNA gyrase B-, and HSP90-like ATPase	-	-	-	-	-	-	-	-	-	-	-	-	HATPase_c,HisKA_3
WP_129756963.1	1358423.N180_06715	8.99e-54	178	2CK4N@1|root,34587@2|Bacteria,4P5AC@976|Bacteroidetes	976|Bacteroidetes	-	-	-	-	-	-	-	-	-	-	-	-	-	-	-
WP_129756964.1	1358423.N180_06720	3.05e-41	138	2DSJ9@1|root,33GDP@2|Bacteria,4NZDI@976|Bacteroidetes	976|Bacteroidetes	-	-	-	-	-	-	-	-	-	-	-	-	-	-	-
WP_100678585.1	1346330.M472_10120	1.19e-45	147	COG0526@1|root,COG0526@2|Bacteria,4NSRJ@976|Bacteroidetes,1ITFG@117747|Sphingobacteriia	976|Bacteroidetes	CO	Thioredoxin	-	-	-	-	-	-	-	-	-	-	-	-	-
WP_129756965.1	1492738.FEM21_22610	6.2e-48	154	arCOG08720@1|root,3320J@2|Bacteria,4NV34@976|Bacteroidetes,1I4JN@117743|Flavobacteriia,2NZXE@237|Flavobacterium	976|Bacteroidetes	S	Domain of unknown function (DUF2024)	-	-	-	-	-	-	-	-	-	-	-	-	DUF2024
WP_129756966.1	1492738.FEM21_22620	9.79e-114	329	COG1846@1|root,COG1846@2|Bacteria,4NH0E@976|Bacteroidetes,1HXR8@117743|Flavobacteriia,2NWAB@237|Flavobacterium	976|Bacteroidetes	K	Regulatory protein MarR	-	-	-	-	-	-	-	-	-	-	-	-	HTH_27,MarR_2
WP_129756968.1	525373.HMPREF0766_12557	2.9e-210	591	COG0582@1|root,COG0582@2|Bacteria,4NDZJ@976|Bacteroidetes,1IPS6@117747|Sphingobacteriia	976|Bacteroidetes	L	Belongs to the 'phage' integrase family	-	-	-	-	-	-	-	-	-	-	-	-	Arm-DNA-bind_5,Phage_int_SAM_5,Phage_integrase
WP_129757414.1	1218108.KB908294_gene2097	2.02e-73	221	COG0629@1|root,COG0629@2|Bacteria,4P04J@976|Bacteroidetes,1I85F@117743|Flavobacteriia	976|Bacteroidetes	L	Single-strand binding protein family	-	-	-	-	-	-	-	-	-	-	-	-	SSB
WP_129757418.1	1233950.IW22_14235	1.29e-27	101	2E81C@1|root,332FF@2|Bacteria,4NV1W@976|Bacteroidetes,1I68U@117743|Flavobacteriia	976|Bacteroidetes	-	-	-	-	-	-	-	-	-	-	-	-	-	-	-
WP_129757419.1	1218108.KB908306_gene305	1.93e-83	253	28I8H@1|root,2Z8BB@2|Bacteria,4NGRI@976|Bacteroidetes,1I0N6@117743|Flavobacteriia	976|Bacteroidetes	S	PRTRC system protein E	-	-	-	-	-	-	-	-	-	-	-	-	-
WP_129757421.1	1218108.KB908294_gene2091	2.07e-178	508	28IV2@1|root,2Z8TP@2|Bacteria,4NGKE@976|Bacteroidetes,1I024@117743|Flavobacteriia	976|Bacteroidetes	-	-	-	-	-	-	-	-	-	-	-	-	-	-	-
WP_129757422.1	1218108.KB908294_gene2090	1.44e-133	382	28M9D@1|root,2ZANB@2|Bacteria,4NIRS@976|Bacteroidetes,1HZ8X@117743|Flavobacteriia	976|Bacteroidetes	S	Prokaryotic E2 family D	-	-	-	-	-	-	-	-	-	-	-	-	Prok-E2_D
WP_129757531.1	1538644.KO02_00435	7.84e-159	449	COG0476@1|root,COG0476@2|Bacteria,4NHIM@976|Bacteroidetes,1IXJW@117747|Sphingobacteriia	976|Bacteroidetes	H	Thiamine biosynthesis protein ThiF	-	-	-	-	-	-	-	-	-	-	-	-	ThiF
WP_129757423.1	525257.HMPREF0204_13000	6.92e-92	273	COG3153@1|root,COG3153@2|Bacteria,4NP1G@976|Bacteroidetes,1I3V2@117743|Flavobacteriia,3ZRMM@59732|Chryseobacterium	976|Bacteroidetes	S	Acetyltransferase (GNAT) domain	-	-	-	-	-	-	-	-	-	-	-	-	Acetyltransf_1,Acetyltransf_9,Zn_ribbon_2
WP_129757424.1	555500.I215_05360	3e-114	335	COG0322@1|root,COG0322@2|Bacteria,4P2WJ@976|Bacteroidetes,1I8M5@117743|Flavobacteriia	976|Bacteroidetes	L	GIY-YIG type nucleases (URI domain)	-	-	-	-	-	-	-	-	-	-	-	-	GIY-YIG
WP_129757425.1	1121288.AULL01000015_gene178	1.45e-104	310	COG1974@1|root,COG1974@2|Bacteria,4PMWC@976|Bacteroidetes,1IJZE@117743|Flavobacteriia,3ZUKH@59732|Chryseobacterium	976|Bacteroidetes	K	Helix-turn-helix XRE-family like proteins	-	-	-	-	-	-	-	-	-	-	-	-	HTH_19,HTH_3,Peptidase_S24
WP_129758699.1	1123037.AUDE01000021_gene2235	2.08e-84	262	COG3385@1|root,COG3385@2|Bacteria,4NQCC@976|Bacteroidetes,1I9PY@117743|Flavobacteriia	976|Bacteroidetes	L	Transposase DDE domain	-	-	-	-	-	-	-	-	-	-	-	-	DDE_Tnp_1
WP_129758698.1	1123037.AUDE01000021_gene2235	2.74e-46	161	COG3385@1|root,COG3385@2|Bacteria,4NQCC@976|Bacteroidetes,1I9PY@117743|Flavobacteriia	976|Bacteroidetes	L	Transposase DDE domain	-	-	-	-	-	-	-	-	-	-	-	-	DDE_Tnp_1
WP_129758697.1	1120951.AUBG01000007_gene169	4.08e-20	89.4	COG1090@1|root,COG1090@2|Bacteria,4NINM@976|Bacteroidetes,1HXRB@117743|Flavobacteriia	976|Bacteroidetes	S	epimerase	-	-	-	ko:K07071	-	-	-	-	ko00000	-	-	-	DUF1731,Epimerase,Lipocalin_2
WP_129758688.1	1416760.AYMS01000033_gene1426	1.05e-48	191	COG3064@1|root,COG4219@1|root,COG3064@2|Bacteria,COG4219@2|Bacteria,4NDWS@976|Bacteroidetes,1HX6K@117743|Flavobacteriia,47H19@76831|Myroides	976|Bacteroidetes	KT	BlaR1 peptidase M56	-	-	-	-	-	-	-	-	-	-	-	-	Peptidase_M56,Plug
WP_129758911.1	886377.Murru_0309	1.85e-23	97.4	COG4122@1|root,COG4122@2|Bacteria,4NG1S@976|Bacteroidetes,1HX2G@117743|Flavobacteriia	976|Bacteroidetes	S	O-Methyltransferase	-	-	-	-	-	-	-	-	-	-	-	-	Methyltransf_24
WP_129758336.1	929713.NIASO_03715	6.05e-108	316	COG1018@1|root,COG1018@2|Bacteria,4NM4J@976|Bacteroidetes	976|Bacteroidetes	C	flavodoxin reductase	-	-	-	-	-	-	-	-	-	-	-	-	FAD_binding_8,NAD_binding_1
WP_129758337.1	1122605.KB893645_gene939	8.43e-103	303	COG0302@1|root,COG0302@2|Bacteria,4NFC2@976|Bacteroidetes,1IRE4@117747|Sphingobacteriia	976|Bacteroidetes	H	GTP cyclohydrolase 1	-	-	3.5.4.16	ko:K01495	ko00790,ko01100,map00790,map01100	M00126,M00841,M00842,M00843	R00428,R04639,R05046,R05048	RC00263,RC00294,RC00323,RC00945,RC01188	ko00000,ko00001,ko00002,ko01000	-	-	-	GTP_cyclohydroI
WP_207209418.1	172045.KS04_12155	9.81e-116	335	COG1595@1|root,COG1595@2|Bacteria,4NEHC@976|Bacteroidetes,1HYVK@117743|Flavobacteriia	976|Bacteroidetes	K	Belongs to the sigma-70 factor family. ECF subfamily	-	-	-	ko:K03088	-	-	-	-	ko00000,ko03021	-	-	-	Sigma70_r2,Sigma70_r4_2
WP_235828698.1	1121899.Q764_12295	9.79e-90	282	COG0526@1|root,COG0526@2|Bacteria,4NEX3@976|Bacteroidetes,1HY1W@117743|Flavobacteriia,2NTXM@237|Flavobacterium	976|Bacteroidetes	CO	Thiol disulfide interchange protein	-	-	-	-	-	-	-	-	-	-	-	-	AhpC-TSA,DUF4369,Thioredoxin_8
WP_129758366.1	1111730.ATTM01000006_gene2564	9.2e-86	266	COG2378@1|root,COG2378@2|Bacteria,4NGHM@976|Bacteroidetes,1HY66@117743|Flavobacteriia,2NSAC@237|Flavobacterium	976|Bacteroidetes	K	Transcriptional regulator	-	-	-	-	-	-	-	-	-	-	-	-	WYL
WP_129758367.1	873517.HMPREF1977_1489	2.24e-07	52.4	2EKZ8@1|root,33ENR@2|Bacteria,4NZM4@976|Bacteroidetes,1IAXC@117743|Flavobacteriia,1ER3M@1016|Capnocytophaga	976|Bacteroidetes	-	-	-	-	-	-	-	-	-	-	-	-	-	-	-
WP_129758570.1	1202532.FF52_21172	8.5e-208	603	COG0457@1|root,COG2885@1|root,COG0457@2|Bacteria,COG2885@2|Bacteria,4NE6G@976|Bacteroidetes,1HXNY@117743|Flavobacteriia,2NSMW@237|Flavobacterium	976|Bacteroidetes	M	Belongs to the ompA family	-	-	-	-	-	-	-	-	-	-	-	-	CarboxypepD_reg,OmpA,PD40
WP_129758572.1	929704.Myrod_3446	2.7e-140	414	COG2304@1|root,COG2304@2|Bacteria,4PKI6@976|Bacteroidetes,1IKI1@117743|Flavobacteriia	976|Bacteroidetes	S	C-terminal domain of CHU protein family	-	-	-	-	-	-	-	-	-	-	-	-	CHU_C
WP_129758573.1	1218103.CIN01S_18_00460	1.63e-51	169	2DD2X@1|root,34189@2|Bacteria,4P43D@976|Bacteroidetes,1I9Y8@117743|Flavobacteriia,3ZS4U@59732|Chryseobacterium	976|Bacteroidetes	-	-	-	-	-	-	-	-	-	-	-	-	-	-	-
WP_129758574.1	1434325.AZQN01000002_gene844	4.08e-304	954	COG1361@1|root,COG5184@1|root,COG1361@2|Bacteria,COG5184@2|Bacteria,4PPBJ@976|Bacteroidetes,47TYA@768503|Cytophagia	976|Bacteroidetes	M	Conserved repeat domain	-	-	-	-	-	-	-	-	-	-	-	-	-
WP_305069530.1	1122226.AUHX01000003_gene64	1.75e-100	357	COG3209@1|root,COG3209@2|Bacteria,4P01B@976|Bacteroidetes,1IKCK@117743|Flavobacteriia	976|Bacteroidetes	M	COG3209 Rhs family protein	-	-	-	-	-	-	-	-	-	-	-	-	-
WP_129758494.1	421531.IX38_16560	5.09e-17	77.4	2ERG3@1|root,33J1N@2|Bacteria,4NYJW@976|Bacteroidetes,1I75N@117743|Flavobacteriia,3ZSID@59732|Chryseobacterium	976|Bacteroidetes	S	transposase	-	-	-	-	-	-	-	-	-	-	-	-	-
WP_129758493.1	1218108.KB908299_gene3346	2.46e-49	162	2BY07@1|root,33Y8V@2|Bacteria,4P30Y@976|Bacteroidetes,1I9DT@117743|Flavobacteriia	976|Bacteroidetes	S	Transposase	-	-	-	-	-	-	-	-	-	-	-	-	-
WP_129758492.1	1550091.JROE01000004_gene1574	1.09e-37	149	COG4585@1|root,COG4585@2|Bacteria,4NWS1@976|Bacteroidetes,1IWAH@117747|Sphingobacteriia	976|Bacteroidetes	T	Histidine kinase	-	-	-	-	-	-	-	-	-	-	-	-	HATPase_c,HisKA_3
WP_129758491.1	1550091.JROE01000004_gene1574	1.05e-110	354	COG4585@1|root,COG4585@2|Bacteria,4NWS1@976|Bacteroidetes,1IWAH@117747|Sphingobacteriia	976|Bacteroidetes	T	Histidine kinase	-	-	-	-	-	-	-	-	-	-	-	-	HATPase_c,HisKA_3
WP_129758490.1	1434325.AZQN01000005_gene3637	1.04e-55	183	COG2197@1|root,COG2197@2|Bacteria,4NS1V@976|Bacteroidetes,47V3Z@768503|Cytophagia	976|Bacteroidetes	K	helix_turn_helix, Lux Regulon	-	-	-	-	-	-	-	-	-	-	-	-	GerE,Response_reg
WP_235828708.1	643867.Ftrac_1232	6.3e-13	67.4	2DMPB@1|root,32SV8@2|Bacteria,4NSG4@976|Bacteroidetes,47SFC@768503|Cytophagia	976|Bacteroidetes	-	-	-	-	-	-	-	-	-	-	-	-	-	-	-
WP_369417921.1	1122621.ATZA01000012_gene3169	5.66e-39	135	2DMPB@1|root,32SV8@2|Bacteria,4NSG4@976|Bacteroidetes,1IXV5@117747|Sphingobacteriia	976|Bacteroidetes	-	-	-	-	-	-	-	-	-	-	-	-	-	-	-
WP_129758488.1	1250006.JHZZ01000001_gene2358	5.74e-92	278	2C9V5@1|root,2Z8F9@2|Bacteria,4NG2N@976|Bacteroidetes,1HZ7U@117743|Flavobacteriia	976|Bacteroidetes	-	-	-	-	-	-	-	-	-	-	-	-	-	-	-
WP_165352989.1	1341181.FLJC2902T_18790	4.76e-19	88.2	COG0464@1|root,COG0464@2|Bacteria,4PMSA@976|Bacteroidetes,1IJYG@117743|Flavobacteriia,2NTHV@237|Flavobacterium	976|Bacteroidetes	O	growth	-	-	-	-	-	-	-	-	-	-	-	-	-
WP_129758486.1	1086011.HJ01_02314	1.6e-18	78.2	2DNTT@1|root,32Z3E@2|Bacteria,4NVJI@976|Bacteroidetes,1ID75@117743|Flavobacteriia,2NXJD@237|Flavobacterium	976|Bacteroidetes	-	-	-	-	-	-	-	-	-	-	-	-	-	-	-
WP_129758484.1	1042376.AFPK01000066_gene2551	1.52e-30	122	28KSX@1|root,2ZAA7@2|Bacteria,4NGE9@976|Bacteroidetes,1HYGG@117743|Flavobacteriia	976|Bacteroidetes	S	Tetracycline regulation of excision, RteC	-	-	-	-	-	-	-	-	-	-	-	-	RteC
WP_165352988.1	1450525.JATV01000009_gene807	4.91e-268	769	COG0156@1|root,COG0156@2|Bacteria,4NHN4@976|Bacteroidetes,1HZ33@117743|Flavobacteriia,2NTFH@237|Flavobacterium	976|Bacteroidetes	H	Aminotransferase class I and II	-	-	2.3.1.29	ko:K00639	ko00260,map00260	-	R00371	RC00004,RC00394	ko00000,ko00001,ko01000,ko01007	-	-	-	Acetyltransf_6,Aminotran_1_2
WP_129758482.1	1392490.JHZX01000001_gene228	3.04e-23	94.4	2E7ZI@1|root,332DX@2|Bacteria,4NUNX@976|Bacteroidetes,1I585@117743|Flavobacteriia	976|Bacteroidetes	-	-	-	-	-	-	-	-	-	-	-	-	-	-	-
WP_129758481.1	1086011.HJ01_03414	1.98e-21	99.8	COG2207@1|root,COG2207@2|Bacteria,4NJW5@976|Bacteroidetes,1I0CK@117743|Flavobacteriia,2NW4U@237|Flavobacterium	976|Bacteroidetes	K	helix_turn_helix, arabinose operon control protein	-	-	-	-	-	-	-	-	-	-	-	-	HTH_18
WP_305069531.1	376686.Fjoh_4377	4.15e-73	239	28K7H@1|root,2Z9VN@2|Bacteria,4NHMJ@976|Bacteroidetes,1HWYM@117743|Flavobacteriia,2NT8J@237|Flavobacterium	976|Bacteroidetes	S	PFAM Methylamine utilisation protein MauE	-	-	-	-	-	-	-	-	-	-	-	-	MauE
WP_129758478.1	307480.IW16_07195	0.000774	42.4	2ACI8@1|root,3124C@2|Bacteria,4P365@976|Bacteroidetes,1I9DN@117743|Flavobacteriia,3ZSTX@59732|Chryseobacterium	976|Bacteroidetes	-	-	-	-	-	-	-	-	-	-	-	-	-	-	-
WP_129758477.1	1346330.M472_11225	4.48e-134	427	COG1506@1|root,COG1506@2|Bacteria,4NDVD@976|Bacteroidetes,1IQM5@117747|Sphingobacteriia	976|Bacteroidetes	E	Prolyl oligopeptidase family	-	-	-	-	-	-	-	-	-	-	-	-	PD40,Peptidase_S9
WP_305069532.1	1346330.M472_11230	2.14e-128	386	COG3193@1|root,COG3193@2|Bacteria,4NGTI@976|Bacteroidetes,1IPED@117747|Sphingobacteriia	976|Bacteroidetes	S	RagB SusD domain protein	-	-	-	ko:K21572	-	-	-	-	ko00000,ko02000	8.A.46.1,8.A.46.3	-	-	SusD-like_3,SusD_RagB
WP_235828707.1	1346330.M472_11235	0	1070	COG1629@1|root,COG1629@2|Bacteria,4NDXS@976|Bacteroidetes,1IV65@117747|Sphingobacteriia	976|Bacteroidetes	P	TonB dependent receptor	-	-	-	-	-	-	-	-	-	-	-	-	CarbopepD_reg_2,Plug,TonB_dep_Rec
WP_129758475.1	172045.KS04_12000	2.4e-33	120	2EJRU@1|root,33DGK@2|Bacteria,4NY4A@976|Bacteroidetes,1I69Y@117743|Flavobacteriia	976|Bacteroidetes	-	-	-	-	-	-	-	-	-	-	-	-	-	-	-
WP_129758472.1	1121287.AUMU01000005_gene3290	2.38e-28	117	2EFDX@1|root,3396Q@2|Bacteria,4P76D@976|Bacteroidetes	976|Bacteroidetes	-	-	-	-	-	-	-	-	-	-	-	-	-	-	-
WP_129758471.1	946077.W5A_09495	9.71e-213	610	COG3593@1|root,COG3593@2|Bacteria	2|Bacteria	L	DNA synthesis involved in DNA repair	-	-	-	-	-	-	-	-	-	-	-	-	AAA_15
WP_129758470.1	41431.PCC8801_4362	0.000286	51.6	2AK2Q@1|root,31ASE@2|Bacteria,1GG9G@1117|Cyanobacteria	1117|Cyanobacteria	-	-	-	-	-	-	-	-	-	-	-	-	-	-	-
WP_369417907.1	1313421.JHBV01000041_gene3511	3.57e-63	196	2E49F@1|root,32Z57@2|Bacteria,4PKEJ@976|Bacteroidetes,1J0I7@117747|Sphingobacteriia	976|Bacteroidetes	S	Domain of unknown function (DUF4180)	-	-	-	-	-	-	-	-	-	-	-	-	DUF4180
WP_129758469.1	1313421.JHBV01000041_gene3511	4.77e-65	199	2E49F@1|root,32Z57@2|Bacteria,4PKEJ@976|Bacteroidetes,1J0I7@117747|Sphingobacteriia	976|Bacteroidetes	S	Domain of unknown function (DUF4180)	-	-	-	-	-	-	-	-	-	-	-	-	DUF4180
WP_165352987.1	1150600.ADIARSV_4059	3.71e-127	365	COG1262@1|root,COG1262@2|Bacteria,4NEUZ@976|Bacteroidetes,1IPVW@117747|Sphingobacteriia	976|Bacteroidetes	S	factor protein	-	-	-	-	-	-	-	-	-	-	-	-	Big_2,FGE-sulfatase
WP_129758468.1	509635.N824_25765	4.63e-38	130	COG1733@1|root,COG1733@2|Bacteria,4NU85@976|Bacteroidetes	976|Bacteroidetes	K	HxlR-like helix-turn-helix	-	-	-	-	-	-	-	-	-	-	-	-	HxlR
WP_129758467.1	1434325.AZQN01000004_gene1495	2.34e-57	181	COG2312@1|root,COG2312@2|Bacteria,4NX7I@976|Bacteroidetes	976|Bacteroidetes	S	Erythromycin esterase	-	-	-	-	-	-	-	-	-	-	-	-	-
WP_129758466.1	1105031.HMPREF1141_0791	2.99e-08	52	2AIX9@1|root,319EX@2|Bacteria,1V7X2@1239|Firmicutes,24J87@186801|Clostridia,36JYE@31979|Clostridiaceae	186801|Clostridia	-	-	-	-	-	-	-	-	-	-	-	-	-	-	-
WP_129758463.1	153721.MYP_855	3.87e-134	385	COG1028@1|root,COG1028@2|Bacteria,4NF7M@976|Bacteroidetes,47NCZ@768503|Cytophagia	976|Bacteroidetes	IQ	KR domain	-	-	-	-	-	-	-	-	-	-	-	-	adh_short_C2
WP_129758498.1	1202532.FF52_14709	4.8e-127	365	COG3826@1|root,COG3826@2|Bacteria,4NHVC@976|Bacteroidetes,1HYDK@117743|Flavobacteriia,2NU9R@237|Flavobacterium	976|Bacteroidetes	S	Oxygenase, catalysing oxidative methylation of damaged DNA	-	-	-	ko:K09990	-	-	-	-	ko00000	-	-	-	Oxygenase-NA
WP_129758462.1	362418.IW19_15935	9.96e-40	132	COG2169@1|root,COG2169@2|Bacteria,4NV90@976|Bacteroidetes,1I5VR@117743|Flavobacteriia,2NX7Y@237|Flavobacterium	976|Bacteroidetes	F	Metal binding domain of Ada	-	-	-	-	-	-	-	-	-	-	-	-	Ada_Zn_binding
WP_129758461.1	991.IW20_15065	8.43e-117	337	COG3145@1|root,COG3145@2|Bacteria,4NFEG@976|Bacteroidetes,1HWRD@117743|Flavobacteriia,2NSMD@237|Flavobacterium	976|Bacteroidetes	L	2OG-Fe(II) oxygenase	alkB	-	-	-	-	-	-	-	-	-	-	-	2OG-FeII_Oxy_2
WP_129758460.1	1237149.C900_01953	9.95e-53	169	COG0346@1|root,COG0346@2|Bacteria,4NTB6@976|Bacteroidetes	976|Bacteroidetes	E	lactoylglutathione lyase activity	-	-	-	-	-	-	-	-	-	-	-	-	-
WP_079643418.1	555500.I215_13507	7.49e-97	286	2DMEE@1|root,32QYB@2|Bacteria,4NRP6@976|Bacteroidetes	976|Bacteroidetes	-	-	-	-	-	-	-	-	-	-	-	-	-	-	-
WP_165352986.1	1150600.ADIARSV_4059	4.27e-114	332	COG1262@1|root,COG1262@2|Bacteria,4NEUZ@976|Bacteroidetes,1IPVW@117747|Sphingobacteriia	976|Bacteroidetes	S	factor protein	-	-	-	-	-	-	-	-	-	-	-	-	Big_2,FGE-sulfatase
WP_165353011.1	1123037.AUDE01000058_gene1521	4.66e-16	84.3	2EGH2@1|root,33A95@2|Bacteria,4NQ3W@976|Bacteroidetes,1II8A@117743|Flavobacteriia	976|Bacteroidetes	S	Domain of unknown function (DUF4375)	-	-	-	-	-	-	-	-	-	-	-	-	DUF4375
WP_129757754.1	1416760.AYMS01000012_gene932	6.47e-79	239	COG0454@1|root,COG0454@2|Bacteria,4NU6Y@976|Bacteroidetes,1I6EG@117743|Flavobacteriia	976|Bacteroidetes	K	Psort location Cytoplasmic, score 8.96	-	-	-	-	-	-	-	-	-	-	-	-	Acetyltransf_10
WP_165352958.1	929704.Myrod_0437	9.23e-50	179	COG3209@1|root,COG3209@2|Bacteria,4NF0G@976|Bacteroidetes,1I0VK@117743|Flavobacteriia	976|Bacteroidetes	M	RHS repeat-associated core domain protein	-	-	-	-	-	-	-	-	-	-	-	-	Peptidase_M23,SpvB,TcdB_toxin_midC,TcdB_toxin_midN,Toxin-JAB1,VCBS
WP_129757758.1	421072.IO89_03570	1.35e-13	75.5	2EQUH@1|root,33IE9@2|Bacteria,4NZBJ@976|Bacteroidetes,1I6JR@117743|Flavobacteriia	976|Bacteroidetes	-	-	-	-	-	-	-	-	-	-	-	-	-	-	-
WP_129757766.1	421072.IO89_09580	2.32e-73	229	COG2323@1|root,COG2323@2|Bacteria,4NMYD@976|Bacteroidetes,1I1GX@117743|Flavobacteriia,3HH2C@358033|Chryseobacterium	976|Bacteroidetes	S	Protein of unknown function (DUF421)	-	-	-	-	-	-	-	-	-	-	-	-	DUF421
WP_235828669.1	762903.Pedsa_1190	1.59e-135	388	COG0730@1|root,COG0730@2|Bacteria,4NIAF@976|Bacteroidetes	976|Bacteroidetes	S	membrane transporter protein	-	-	-	ko:K07090	-	-	-	-	ko00000	-	-	-	TauE
WP_207209409.1	1434325.AZQN01000002_gene1332	2.24e-93	280	COG1708@1|root,COG1708@2|Bacteria,4NMIA@976|Bacteroidetes,47P7X@768503|Cytophagia	976|Bacteroidetes	S	Streptomycin adenylyltransferase	-	-	-	-	-	-	-	-	-	-	-	-	Adenyl_transf
WP_235828671.1	649349.Lbys_0788	3.06e-43	149	COG2207@1|root,COG2207@2|Bacteria,4NISK@976|Bacteroidetes,47KUX@768503|Cytophagia	976|Bacteroidetes	K	helix_turn_helix, arabinose operon control protein	-	-	-	-	-	-	-	-	-	-	-	-	HTH_18
WP_129757776.1	468059.AUHA01000002_gene379	1.12e-59	191	COG0262@1|root,COG0262@2|Bacteria,4NPJF@976|Bacteroidetes,1J056@117747|Sphingobacteriia	976|Bacteroidetes	H	RibD C-terminal domain	-	-	-	-	-	-	-	-	-	-	-	-	RibD_C
WP_369417922.1	402777.KB235898_gene5567	5.95e-62	195	COG0457@1|root,COG0457@2|Bacteria,1GR35@1117|Cyanobacteria	1117|Cyanobacteria	S	Rifampin ADP-ribosyl transferase	-	-	-	-	-	-	-	-	-	-	-	-	Arr-ms
WP_129757778.1	616991.JPOO01000003_gene271	7.21e-70	217	2DNPN@1|root,32YG3@2|Bacteria,4NRKS@976|Bacteroidetes,1I3BA@117743|Flavobacteriia	976|Bacteroidetes	S	Protein of unknown function (DUF2867)	-	-	-	-	-	-	-	-	-	-	-	-	DUF2867
WP_129756433.1	1121897.AUGO01000001_gene1404	0.000227	46.2	2A2UD@1|root,30R8B@2|Bacteria,4PDGN@976|Bacteroidetes,1IDYF@117743|Flavobacteriia,2NZGQ@237|Flavobacterium	976|Bacteroidetes	-	-	-	-	-	-	-	-	-	-	-	-	-	-	-
WP_129756432.1	1111730.ATTM01000003_gene492	8.33e-09	58.2	2A2UD@1|root,30R8B@2|Bacteria,4PDGN@976|Bacteroidetes,1IDYF@117743|Flavobacteriia,2NZGQ@237|Flavobacterium	976|Bacteroidetes	-	-	-	-	-	-	-	-	-	-	-	-	-	-	-
WP_129756429.1	1218103.CIN01S_19_00920	2.53e-12	71.6	2E009@1|root,32VPQ@2|Bacteria,4NSEG@976|Bacteroidetes,1I4E4@117743|Flavobacteriia,3ZS1A@59732|Chryseobacterium	976|Bacteroidetes	-	-	-	-	-	-	-	-	-	-	-	-	-	-	-
WP_129756422.1	1461577.CCMH01000006_gene1993	2.1e-66	206	COG4815@1|root,COG4815@2|Bacteria,4NQCN@976|Bacteroidetes,1I2TA@117743|Flavobacteriia	976|Bacteroidetes	S	Pfam MepB protein	-	-	-	-	-	-	-	-	-	-	-	-	MepB
WP_129756420.1	1461577.CCMH01000004_gene1300	2.86e-295	848	28JMZ@1|root,2Z9EE@2|Bacteria,4NKS8@976|Bacteroidetes,1I0SV@117743|Flavobacteriia	976|Bacteroidetes	-	-	-	-	-	-	-	-	-	-	-	-	-	-	-
WP_129756419.1	1461577.CCMH01000004_gene1299	7.78e-105	318	2CF9Q@1|root,2ZCHF@2|Bacteria,4NMY1@976|Bacteroidetes,1I360@117743|Flavobacteriia	976|Bacteroidetes	-	-	-	-	-	-	-	-	-	-	-	-	-	-	-
WP_129756418.1	1461577.CCMH01000004_gene1298	2.39e-126	366	COG3121@1|root,COG3121@2|Bacteria,4NN0T@976|Bacteroidetes,1I1UP@117743|Flavobacteriia	976|Bacteroidetes	NU	Chaperone	-	-	-	-	-	-	-	-	-	-	-	-	-
WP_129756417.1	1461577.CCMH01000004_gene1297	1.4e-43	150	2D98T@1|root,32TSW@2|Bacteria,4NSTG@976|Bacteroidetes,1I4UE@117743|Flavobacteriia	976|Bacteroidetes	-	-	-	-	-	-	-	-	-	-	-	-	-	-	-
WP_129756416.1	525257.HMPREF0204_14237	1.44e-30	116	2D98T@1|root,32TSW@2|Bacteria,4NSTG@976|Bacteroidetes,1I4UE@117743|Flavobacteriia,3ZRNH@59732|Chryseobacterium	976|Bacteroidetes	-	-	-	-	-	-	-	-	-	-	-	-	-	-	-
WP_129756415.1	1461577.CCMH01000004_gene1296	4.54e-98	296	COG2207@1|root,COG2207@2|Bacteria,4NJNH@976|Bacteroidetes,1HYVI@117743|Flavobacteriia	976|Bacteroidetes	K	helix_turn_helix, arabinose operon control protein	-	-	-	-	-	-	-	-	-	-	-	-	AraC_binding,HTH_18
WP_129756402.1	572265.HDEF_0181	7.19e-34	140	2BTEW@1|root,32NM5@2|Bacteria,1N0GK@1224|Proteobacteria,1SBDU@1236|Gammaproteobacteria	1236|Gammaproteobacteria	S	membrane	-	-	-	-	-	-	-	-	-	-	-	-	Glucos_trans_II
WP_129756401.1	572265.HDEF_0181	3.98e-36	147	2BTEW@1|root,32NM5@2|Bacteria,1N0GK@1224|Proteobacteria,1SBDU@1236|Gammaproteobacteria	1236|Gammaproteobacteria	S	membrane	-	-	-	-	-	-	-	-	-	-	-	-	Glucos_trans_II
WP_305069525.1	1121898.Q766_15785	6.52e-110	397	COG1572@1|root,COG3291@1|root,COG3391@1|root,COG3405@1|root,COG1572@2|Bacteria,COG3291@2|Bacteria,COG3391@2|Bacteria,COG3405@2|Bacteria,4NWIZ@976|Bacteroidetes,1ICM5@117743|Flavobacteriia,2NVG1@237|Flavobacterium	976|Bacteroidetes	G	Fibronectin type 3 domain	-	-	-	-	-	-	-	-	-	-	-	-	fn3
WP_165352978.1	1348583.ATLH01000001_gene3554	2.38e-67	233	COG2956@1|root,COG2956@2|Bacteria,4PPH4@976|Bacteroidetes,1IN3X@117743|Flavobacteriia	976|Bacteroidetes	G	SusD family	-	-	-	-	-	-	-	-	-	-	-	-	SusD-like_3,SusD_RagB
WP_165352979.1	1121286.AUMT01000010_gene3906	4.5e-95	314	COG1404@1|root,COG1404@2|Bacteria,4NFMW@976|Bacteroidetes,1IFSA@117743|Flavobacteriia,3ZP3E@59732|Chryseobacterium	976|Bacteroidetes	O	Subtilase family	-	-	-	-	-	-	-	-	-	-	-	-	PKD,P_proprotein,Peptidase_S8,fn3
WP_129758231.1	445961.IW15_07720	0.000703	49.3	28YC7@1|root,2ZK6U@2|Bacteria,4P8M8@976|Bacteroidetes,1IC0Q@117743|Flavobacteriia	976|Bacteroidetes	-	-	-	-	-	-	-	-	-	-	-	-	-	-	-
WP_129758237.1	1500281.JQKZ01000024_gene2774	1.4e-17	78.2	2E20X@1|root,32X8W@2|Bacteria,4P6A2@976|Bacteroidetes,1IGYB@117743|Flavobacteriia,3ZSG0@59732|Chryseobacterium	976|Bacteroidetes	-	-	-	-	-	-	-	-	-	-	-	-	-	-	-
WP_129758239.1	1008457.BAEX01000018_gene1819	5.7e-12	69.7	2DPD5@1|root,331JR@2|Bacteria,4NVSC@976|Bacteroidetes,1I53F@117743|Flavobacteriia,47IIY@76831|Myroides	976|Bacteroidetes	-	-	-	-	-	-	-	-	-	-	-	-	-	-	-
WP_129758240.1	926559.JoomaDRAFT_1357	8.9e-09	59.7	2DPD5@1|root,331JR@2|Bacteria,4NVSC@976|Bacteroidetes	976|Bacteroidetes	-	-	-	-	-	-	-	-	-	-	-	-	-	-	-
WP_129758245.1	1218108.KB908294_gene2204	1.92e-34	125	COG1714@1|root,COG1714@2|Bacteria,4NW7A@976|Bacteroidetes,1I578@117743|Flavobacteriia	976|Bacteroidetes	S	RDD family	-	-	-	-	-	-	-	-	-	-	-	-	RDD
WP_129758250.1	1341181.FLJC2902T_11290	1.11e-25	105	2EF3U@1|root,338WY@2|Bacteria,4NU48@976|Bacteroidetes,1I436@117743|Flavobacteriia,2NTKM@237|Flavobacterium	976|Bacteroidetes	-	-	-	-	-	-	-	-	-	-	-	-	-	-	-
WP_129756603.1	1406840.Q763_00005	1.77e-64	210	COG3279@1|root,COG3279@2|Bacteria,4NVVV@976|Bacteroidetes,1IEUX@117743|Flavobacteriia,2NY1E@237|Flavobacterium	976|Bacteroidetes	KT	LytTr DNA-binding domain	-	-	-	-	-	-	-	-	-	-	-	-	LytTR
WP_129756602.1	1406840.Q763_00010	7.18e-158	463	COG0793@1|root,COG0793@2|Bacteria	2|Bacteria	M	Belongs to the peptidase S41A family	-	-	3.4.21.102	ko:K03797	-	-	-	-	ko00000,ko01000,ko01002	-	-	-	Peptidase_S41,TPR_8,Tricorn_C1
WP_129756600.1	525257.HMPREF0204_11528	8.29e-67	204	2BVDJ@1|root,32QTH@2|Bacteria,4NQEE@976|Bacteroidetes,1I3QI@117743|Flavobacteriia,3ZTP3@59732|Chryseobacterium	976|Bacteroidetes	-	-	-	-	-	-	-	-	-	-	-	-	-	-	-
WP_235828603.1	1218103.CIN01S_15_01070	2.81e-39	134	2E6X0@1|root,2ZKFY@2|Bacteria,4NMC3@976|Bacteroidetes,1I1K3@117743|Flavobacteriia,3ZTFT@59732|Chryseobacterium	976|Bacteroidetes	S	Protein of unknown function (DUF3408)	-	-	-	-	-	-	-	-	-	-	-	-	DUF3408
WP_056073103.1	1004149.AFOE01000006_gene2016	1.04e-29	106	COG1476@1|root,COG1476@2|Bacteria,4PKTU@976|Bacteroidetes,1I50U@117743|Flavobacteriia	976|Bacteroidetes	K	PFAM Helix-turn-helix type 3	-	-	-	-	-	-	-	-	-	-	-	-	HTH_3
WP_235828601.1	869209.Tresu_0530	2.4e-156	456	COG0270@1|root,COG0270@2|Bacteria,2J8AP@203691|Spirochaetes	203691|Spirochaetes	H	PFAM C-5 cytosine-specific DNA methylase	-	-	2.1.1.37	ko:K00558	ko00270,ko01100,ko05206,map00270,map01100,map05206	M00035	R04858	RC00003,RC00332	ko00000,ko00001,ko00002,ko01000,ko02048,ko03032,ko03036	-	-	-	DNA_methylase
WP_129756596.1	1550091.JROE01000002_gene791	1.41e-205	593	COG1401@1|root,COG1401@2|Bacteria,4NN8Z@976|Bacteroidetes,1IYAF@117747|Sphingobacteriia	976|Bacteroidetes	V	AAA domain (dynein-related subfamily)	-	-	-	-	-	-	-	-	-	-	-	-	AAA_5,DUF4268
WP_129756595.1	1550091.JROE01000002_gene792	0	1031	28N33@1|root,2ZB8U@2|Bacteria,4NK93@976|Bacteroidetes	976|Bacteroidetes	L	LlaJI restriction endonuclease	-	-	-	-	-	-	-	-	-	-	-	-	RE_LlaJI
WP_129756594.1	1048983.EL17_18750	1.83e-86	259	2EEMV@1|root,338FR@2|Bacteria	2|Bacteria	-	-	-	-	-	-	-	-	-	-	-	-	-	-	-
WP_162796121.1	1048983.EL17_18745	2.01e-149	429	28J3G@1|root,2Z8ZQ@2|Bacteria	2|Bacteria	S	Domain of unknown function (DUF4868)	-	-	-	-	-	-	-	-	-	-	-	-	DUF4868
WP_129756592.1	1144313.PMI10_00686	1.8e-38	142	2CEM2@1|root,311GX@2|Bacteria,4PGAI@976|Bacteroidetes,1IDEI@117743|Flavobacteriia,2NY5A@237|Flavobacterium	976|Bacteroidetes	-	-	-	-	-	-	-	-	-	-	-	-	-	-	-
WP_129756591.1	1305737.JAFX01000001_gene3165	6.11e-146	418	COG3177@1|root,COG3177@2|Bacteria,4NIG2@976|Bacteroidetes	976|Bacteroidetes	S	Fic family	-	-	-	-	-	-	-	-	-	-	-	-	Fic
WP_129756582.1	525373.HMPREF0766_12561	1.26e-67	207	COG0629@1|root,COG0629@2|Bacteria,4NNED@976|Bacteroidetes,1IYS3@117747|Sphingobacteriia	976|Bacteroidetes	L	Single-stranded DNA-binding protein	-	-	-	ko:K03111	ko03030,ko03430,ko03440,map03030,map03430,map03440	-	-	-	ko00000,ko00001,ko03029,ko03032,ko03400	-	-	-	SSB
WP_129756580.1	1121285.AUFK01000020_gene3306	2.03e-27	102	2EATM@1|root,31171@2|Bacteria,4PFY0@976|Bacteroidetes,1IIGE@117743|Flavobacteriia,3ZU0U@59732|Chryseobacterium	976|Bacteroidetes	-	-	-	-	-	-	-	-	-	-	-	-	-	-	-
WP_129756579.1	1121285.AUFK01000020_gene3307	3.52e-77	234	28NGX@1|root,2ZBIW@2|Bacteria,4NGVP@976|Bacteroidetes,1I14D@117743|Flavobacteriia,3ZNYV@59732|Chryseobacterium	976|Bacteroidetes	-	-	-	-	-	-	-	-	-	-	-	-	-	-	-
WP_129756577.1	1035193.HMPREF9073_00013	2.87e-52	175	2DHUB@1|root,300ZA@2|Bacteria,4NSCS@976|Bacteroidetes,1I4SI@117743|Flavobacteriia	976|Bacteroidetes	-	-	-	-	-	-	-	-	-	-	-	-	-	-	-
WP_129756576.1	1461577.CCMH01000018_gene417	8.97e-82	249	28I8H@1|root,2Z8BB@2|Bacteria,4NGRI@976|Bacteroidetes,1I0N6@117743|Flavobacteriia	976|Bacteroidetes	S	PRTRC system protein E	-	-	-	-	-	-	-	-	-	-	-	-	-
WP_129756574.1	1218103.CIN01S_12_02690	2.74e-184	523	28IV2@1|root,2Z8TP@2|Bacteria,4NGKE@976|Bacteroidetes,1I024@117743|Flavobacteriia,3ZPYW@59732|Chryseobacterium	976|Bacteroidetes	-	-	-	-	-	-	-	-	-	-	-	-	-	-	-
WP_129756573.1	1450525.JATV01000010_gene1551	4.93e-129	371	28M9D@1|root,2ZANB@2|Bacteria,4NIRS@976|Bacteroidetes,1HZ9T@117743|Flavobacteriia,2NSJV@237|Flavobacterium	976|Bacteroidetes	S	PRTRC system protein B	-	-	-	-	-	-	-	-	-	-	-	-	Prok-E2_D
WP_207209391.1	742766.HMPREF9455_04133	0	986	COG0497@1|root,COG0613@1|root,COG0497@2|Bacteria,COG0613@2|Bacteria,4NKFE@976|Bacteroidetes	976|Bacteroidetes	L	DNA recombination	-	-	-	-	-	-	-	-	-	-	-	-	AAA_21,AAA_23,PHP
WP_129756570.1	172045.KS04_19360	3.17e-203	563	28HGP@1|root,2Z7SG@2|Bacteria,4NI2F@976|Bacteroidetes,1HY68@117743|Flavobacteriia	976|Bacteroidetes	-	-	-	-	-	-	-	-	-	-	-	-	-	-	-
WP_129756569.1	172045.KS04_19355	1.62e-58	184	COG2197@1|root,COG2197@2|Bacteria,4P2TT@976|Bacteroidetes,1I8QI@117743|Flavobacteriia	976|Bacteroidetes	KT	response regulator	-	-	-	-	-	-	-	-	-	-	-	-	-
WP_129756567.1	1506583.JQJY01000001_gene706	2.43e-45	184	2EKDB@1|root,33E3M@2|Bacteria,4PPXK@976|Bacteroidetes,1IKWY@117743|Flavobacteriia,2P0WZ@237|Flavobacterium	976|Bacteroidetes	-	-	-	-	-	-	-	-	-	-	-	-	-	-	-
WP_129756566.1	1041826.FCOL_03765	3.12e-10	65.9	2E7SG@1|root,3327P@2|Bacteria,4NXCJ@976|Bacteroidetes,1IADJ@117743|Flavobacteriia	976|Bacteroidetes	-	-	-	-	-	-	-	-	-	-	-	-	-	-	-
WP_129756565.1	1233951.IO90_10405	0	2510	2DM7Q@1|root,322X9@2|Bacteria,4NKDH@976|Bacteroidetes,1HZT2@117743|Flavobacteriia	976|Bacteroidetes	-	-	-	-	-	-	-	-	-	-	-	-	-	-	-
WP_129756563.1	525373.HMPREF0766_13849	3.4e-38	142	2CT0M@1|root,32SSC@2|Bacteria,4NS6D@976|Bacteroidetes	976|Bacteroidetes	-	-	-	-	-	-	-	-	-	-	-	-	-	-	-
WP_129756562.1	402612.FP0214	2.19e-32	125	2A2JN@1|root,30QXM@2|Bacteria,4PD5C@976|Bacteroidetes,1IDPB@117743|Flavobacteriia,2NYWJ@237|Flavobacterium	976|Bacteroidetes	-	-	-	-	-	-	-	-	-	-	-	-	-	-	-
WP_129756557.1	880074.BARVI_09675	4.02e-17	91.3	COG5492@1|root,COG5492@2|Bacteria,4NIPJ@976|Bacteroidetes,2FR2K@200643|Bacteroidia,22XKA@171551|Porphyromonadaceae	976|Bacteroidetes	N	Leucine rich repeats (6 copies)	-	-	-	-	-	-	-	-	-	-	-	-	LRR_5
WP_129756552.1	926556.Echvi_3172	2.09e-22	90.1	2AG3J@1|root,31DWX@2|Bacteria,4PBCZ@976|Bacteroidetes,47VP0@768503|Cytophagia	976|Bacteroidetes	-	-	-	-	-	-	-	-	-	-	-	-	-	-	-
WP_129756551.1	1123234.AUKI01000024_gene2184	5.96e-22	93.2	2E9M8@1|root,333TX@2|Bacteria,4NV2R@976|Bacteroidetes,1I6RN@117743|Flavobacteriia	976|Bacteroidetes	-	-	-	-	-	-	-	-	-	-	-	-	-	-	-
WP_129756550.1	1296415.JACC01000043_gene79	1.44e-69	232	2DKMJ@1|root,309XW@2|Bacteria,4NNRT@976|Bacteroidetes	976|Bacteroidetes	S	Peptidase C10 family	-	-	-	-	-	-	-	-	-	-	-	-	Inhibitor_I69,Peptidase_C10
WP_129756548.1	1218108.KB908306_gene319	6.08e-134	403	2A774@1|root,30W38@2|Bacteria,4NPP9@976|Bacteroidetes,1I9B3@117743|Flavobacteriia	976|Bacteroidetes	-	-	-	-	-	-	-	-	-	-	-	-	-	-	-
WP_129756537.1	553177.CAPSP0001_1727	3.54e-109	326	COG0338@1|root,COG0338@2|Bacteria,4NFZ2@976|Bacteroidetes,1I484@117743|Flavobacteriia,1EREU@1016|Capnocytophaga	976|Bacteroidetes	L	DNA adenine methylase	dam	-	2.1.1.72	ko:K06223	ko03430,map03430	-	-	-	ko00000,ko00001,ko01000,ko02048,ko03032,ko03400	-	-	-	MethyltransfD12
WP_129756536.1	649349.Lbys_0171	5e-87	262	28JRR@1|root,2Z9HA@2|Bacteria,4NGXT@976|Bacteroidetes,47UDT@768503|Cytophagia	976|Bacteroidetes	S	Conjugal transfer protein TraD	-	-	-	-	-	-	-	-	-	-	-	-	-
WP_129756534.1	1218108.KB908308_gene211	1.18e-42	140	2E6X0@1|root,335FF@2|Bacteria,4NV4Y@976|Bacteroidetes,1I9RH@117743|Flavobacteriia	976|Bacteroidetes	S	Protein of unknown function (DUF3408)	-	-	-	-	-	-	-	-	-	-	-	-	DUF3408
WP_129756533.1	1218108.KB908308_gene210	1.12e-62	196	2E6X0@1|root,30IUG@2|Bacteria,4NP1V@976|Bacteroidetes,1I31S@117743|Flavobacteriia	976|Bacteroidetes	S	Protein of unknown function (DUF3408)	-	-	-	-	-	-	-	-	-	-	-	-	DUF3408
WP_129756530.1	1296415.JACC01000013_gene264	1.03e-43	165	2DKMJ@1|root,309XW@2|Bacteria,4NNRT@976|Bacteroidetes,1IIJX@117743|Flavobacteriia	976|Bacteroidetes	S	Spi protease inhibitor	-	-	-	-	-	-	-	-	-	-	-	-	Inhibitor_I69,Peptidase_C10
WP_129756525.1	1121887.AUDK01000003_gene2700	1.62e-193	578	COG1629@1|root,COG4771@2|Bacteria,4NEIG@976|Bacteroidetes,1IJ85@117743|Flavobacteriia,2NSDJ@237|Flavobacterium	976|Bacteroidetes	P	Outer membrane protein beta-barrel family	-	-	-	-	-	-	-	-	-	-	-	-	CarbopepD_reg_2,CarboxypepD_reg,OMP_b-brl_3
WP_235828595.1	421531.IX38_01465	5.93e-201	565	COG0641@1|root,COG0641@2|Bacteria,4NG1N@976|Bacteroidetes,1I277@117743|Flavobacteriia,3ZQJP@59732|Chryseobacterium	976|Bacteroidetes	C	Anaerobic sulfatase maturase	-	-	-	ko:K06871	-	-	-	-	ko00000	-	-	-	Fer4_12,Radical_SAM
WP_305069523.1	421531.IX38_01470	0	920	COG2274@1|root,COG2274@2|Bacteria,4NE19@976|Bacteroidetes,1HXXQ@117743|Flavobacteriia,3ZNM3@59732|Chryseobacterium	976|Bacteroidetes	V	ABC transporter, ATP-binding protein	-	-	-	ko:K06147	-	-	-	-	ko00000,ko02000	3.A.1.106,3.A.1.109,3.A.1.21	-	-	ABC_membrane,ABC_tran,Peptidase_C39
WP_129756520.1	1218108.KB908291_gene896	9.84e-112	327	COG1309@1|root,COG1309@2|Bacteria,4NII6@976|Bacteroidetes,1HWR4@117743|Flavobacteriia	976|Bacteroidetes	K	transcriptional regulator	-	-	-	-	-	-	-	-	-	-	-	-	TetR_N
WP_129756517.1	1120925.F941_02922	2.28e-177	503	COG1479@1|root,COG1479@2|Bacteria,1N34S@1224|Proteobacteria,1S9SD@1236|Gammaproteobacteria	1236|Gammaproteobacteria	S	Protein of unknown function DUF262	-	-	-	-	-	-	-	-	-	-	-	-	DUF262
WP_129756516.1	97139.C824_02720	1.49e-06	54.7	2EKEH@1|root,33E4P@2|Bacteria	2|Bacteria	-	-	-	-	-	-	-	-	-	-	-	-	-	-	-
WP_129757526.1	1406840.Q763_04975	4.65e-269	764	COG1629@1|root,COG4771@2|Bacteria,4NET0@976|Bacteroidetes,1HY46@117743|Flavobacteriia,2NTGY@237|Flavobacterium	976|Bacteroidetes	P	TonB-dependent receptor	-	-	-	ko:K16089	-	-	-	-	ko00000,ko02000	1.B.14.1,1.B.14.10	-	-	CarbopepD_reg_2,OMP_b-brl_3,Plug,TonB_dep_Rec
WP_129758117.1	1121870.AUAA01000021_gene1305	6.3e-138	396	28HAW@1|root,2Z7N4@2|Bacteria,4NG29@976|Bacteroidetes,1IM74@117743|Flavobacteriia,3HIIE@358033|Chryseobacterium	976|Bacteroidetes	S	KilA-N	-	-	-	-	-	-	-	-	-	-	-	-	KilA-N
WP_129758116.1	648757.Rvan_1298	3.91e-08	60.5	2AUQT@1|root,31KDR@2|Bacteria,1RJ52@1224|Proteobacteria,2U6V7@28211|Alphaproteobacteria,3N8HS@45401|Hyphomicrobiaceae	28211|Alphaproteobacteria	-	-	-	-	-	-	-	-	-	-	-	-	-	-	-
WP_369417920.1	1034807.FBFL15_0819	6.51e-56	177	COG1943@1|root,COG1943@2|Bacteria,4NNFK@976|Bacteroidetes,1I3JQ@117743|Flavobacteriia,2NW3E@237|Flavobacterium	976|Bacteroidetes	L	Transposase IS200 like	-	-	-	-	-	-	-	-	-	-	-	-	Y1_Tnp
WP_129758111.1	376686.Fjoh_2835	5.95e-54	174	2CVJ7@1|root,32SXQ@2|Bacteria,4NTD0@976|Bacteroidetes,1I9WP@117743|Flavobacteriia,2NW15@237|Flavobacterium	976|Bacteroidetes	S	Domain of unknown function (DUF4265)	-	-	-	-	-	-	-	-	-	-	-	-	DUF4265
WP_129758099.1	1122621.ATZA01000080_gene2822	7.34e-59	184	COG5499@1|root,COG5499@2|Bacteria,4NNXF@976|Bacteroidetes,1IT0M@117747|Sphingobacteriia	976|Bacteroidetes	K	Helix-turn-helix XRE-family like proteins	-	-	-	ko:K18831	-	-	-	-	ko00000,ko02048,ko03000	-	-	-	HTH_3
WP_129758098.1	1233951.IO90_06215	1.04e-55	174	COG4680@1|root,COG4680@2|Bacteria,4NQ54@976|Bacteroidetes,1I2RY@117743|Flavobacteriia	976|Bacteroidetes	S	protein conserved in bacteria	-	-	-	ko:K19166	-	-	-	-	ko00000,ko01000,ko02048	-	-	-	HigB_toxin
WP_129758087.1	1121896.JMLU01000001_gene897	1.85e-05	52.8	COG3209@1|root,COG3209@2|Bacteria,4P7S2@976|Bacteroidetes,1IBPC@117743|Flavobacteriia,2NWB4@237|Flavobacterium	976|Bacteroidetes	M	COG3209 Rhs family protein	-	-	-	-	-	-	-	-	-	-	-	-	-
WP_129758076.1	1216967.L100_05716	5.28e-156	448	2DBCT@1|root,2Z8FK@2|Bacteria,4PKQY@976|Bacteroidetes,1HYK1@117743|Flavobacteriia,34QAS@308865|Elizabethkingia	976|Bacteroidetes	S	Peptide-N-glycosidase F, C terminal	-	-	-	-	-	-	-	-	-	-	-	-	N-glycanase_C,N-glycanase_N
WP_129758066.1	1122971.BAME01000096_gene5721	3.27e-21	99.4	COG0810@1|root,COG4219@1|root,COG0810@2|Bacteria,COG4219@2|Bacteria,4NDWS@976|Bacteroidetes,2FNCU@200643|Bacteroidia,22X60@171551|Porphyromonadaceae	976|Bacteroidetes	KMT	Interacts with outer membrane receptor proteins that carry out high-affinity binding and energy dependent uptake into the periplasmic space of specific substrates. It could act to transduce energy from the cytoplasmic membrane to specific energy- requiring processes in the outer membrane, resulting in the release into the periplasm of ligands bound by these outer membrane proteins	-	-	-	-	-	-	-	-	-	-	-	-	CarbopepD_reg_2,Peptidase_M56,TonB_C
WP_129758064.1	1506583.JQJY01000002_gene1543	3.08e-43	169	COG4219@1|root,COG4219@2|Bacteria,4NHAY@976|Bacteroidetes,1HXH6@117743|Flavobacteriia,2NT07@237|Flavobacterium	976|Bacteroidetes	KT	BlaR1 peptidase M56	-	-	-	-	-	-	-	-	-	-	-	-	Peptidase_M56,TonB_C
WP_129757394.1	745718.JADT01000001_gene1713	5.18e-58	189	COG3637@1|root,COG3637@2|Bacteria,4NR9K@976|Bacteroidetes,1I34P@117743|Flavobacteriia	976|Bacteroidetes	M	Opacity protein	-	-	-	-	-	-	-	-	-	-	-	-	OMP_b-brl_2
WP_129758054.1	1392489.JPOL01000002_gene3011	1.52e-53	176	COG2129@1|root,COG2129@2|Bacteria,4NNRJ@976|Bacteroidetes,1I2D7@117743|Flavobacteriia	976|Bacteroidetes	S	Calcineurin-like phosphoesterase	-	-	-	-	-	-	-	-	-	-	-	-	Metallophos,Metallophos_2
WP_129758030.1	1121896.JMLU01000011_gene1496	3.52e-63	201	COG0237@1|root,COG0237@2|Bacteria,4NQKS@976|Bacteroidetes,1I1XH@117743|Flavobacteriia,2NUAP@237|Flavobacterium	976|Bacteroidetes	F	Catalyzes the phosphorylation of the 3'-hydroxyl group of dephosphocoenzyme A to form coenzyme A	coaE	GO:0003674,GO:0003824,GO:0004140,GO:0006139,GO:0006163,GO:0006164,GO:0006725,GO:0006732,GO:0006753,GO:0006793,GO:0006796,GO:0006807,GO:0008150,GO:0008152,GO:0009058,GO:0009108,GO:0009117,GO:0009150,GO:0009152,GO:0009165,GO:0009259,GO:0009260,GO:0009987,GO:0015936,GO:0015937,GO:0016301,GO:0016310,GO:0016740,GO:0016772,GO:0016773,GO:0018130,GO:0019438,GO:0019637,GO:0019693,GO:0033865,GO:0033866,GO:…	2.7.1.24	ko:K00859	ko00770,ko01100,map00770,map01100	M00120	R00130	RC00002,RC00078	ko00000,ko00001,ko00002,ko01000	-	-	-	CoaE
WP_129758057.1	491205.JARQ01000003_gene2066	5.51e-27	102	2DMKZ@1|root,32SAQ@2|Bacteria,4NS7K@976|Bacteroidetes,1I49R@117743|Flavobacteriia,3ZSC3@59732|Chryseobacterium	976|Bacteroidetes	-	-	-	-	-	-	-	-	-	-	-	-	-	-	MpPF26
WP_129758022.1	1107311.Q767_09510	5.39e-11	58.9	2DGA6@1|root,2ZV3N@2|Bacteria,4P8FQ@976|Bacteroidetes,1ID7M@117743|Flavobacteriia,2NXM7@237|Flavobacterium	976|Bacteroidetes	-	-	-	-	-	-	-	-	-	-	-	-	-	-	-
WP_129758014.1	1094466.KQS_13950	2.98e-167	488	COG5563@1|root,COG5563@2|Bacteria,4NI94@976|Bacteroidetes,1HZ68@117743|Flavobacteriia,2NYNA@237|Flavobacterium	976|Bacteroidetes	S	FG-GAP repeat	-	-	-	-	-	-	-	-	-	-	-	-	FG-GAP_2
WP_129758008.1	1107311.Q767_03185	1.3e-25	112	COG4935@1|root,COG4935@2|Bacteria	2|Bacteria	O	Belongs to the peptidase S8 family	-	-	-	-	-	-	-	-	-	-	-	-	Inhibitor_I9,P_proprotein,Peptidase_S8
WP_129758006.1	1107311.Q767_03185	7.24e-28	119	COG4935@1|root,COG4935@2|Bacteria	2|Bacteria	O	Belongs to the peptidase S8 family	-	-	-	-	-	-	-	-	-	-	-	-	Inhibitor_I9,P_proprotein,Peptidase_S8
WP_129758007.1	1107311.Q767_03195	2.31e-44	162	COG4886@1|root,COG4886@2|Bacteria,4PKY4@976|Bacteroidetes,1IJH0@117743|Flavobacteriia	976|Bacteroidetes	S	Leucine-rich repeat (LRR) protein	-	-	-	-	-	-	-	-	-	-	-	-	-
WP_129758000.1	1450525.JATV01000024_gene1329	4.11e-24	93.6	2DMNP@1|root,32SQ4@2|Bacteria,4NT2A@976|Bacteroidetes,1I3Z7@117743|Flavobacteriia,2NXMN@237|Flavobacterium	976|Bacteroidetes	-	-	-	-	-	-	-	-	-	-	-	-	-	-	-
WP_129757999.1	1121889.AUDM01000010_gene686	1.28e-52	169	COG1848@1|root,COG1848@2|Bacteria,4NNGQ@976|Bacteroidetes,1I21J@117743|Flavobacteriia,2P0BR@237|Flavobacterium	976|Bacteroidetes	S	Large family of predicted nucleotide-binding domains	-	-	-	-	-	-	-	-	-	-	-	-	PIN,PIN_3
WP_129757998.1	1121870.AUAA01000084_gene1179	1.62e-112	326	2BVHX@1|root,32QW9@2|Bacteria,4NRCJ@976|Bacteroidetes,1I3DT@117743|Flavobacteriia	976|Bacteroidetes	-	-	-	-	-	-	-	-	-	-	-	-	-	-	-
WP_129757997.1	1416760.AYMS01000057_gene3082	2.26e-11	73.6	COG2312@1|root,COG2312@2|Bacteria,4NW00@976|Bacteroidetes,1IIJP@117743|Flavobacteriia	976|Bacteroidetes	S	Erythromycin esterase	-	-	-	ko:K06880	-	-	-	-	ko00000,ko01000,ko01504	-	-	-	CarbopepD_reg_2,Erythro_esteras
WP_129757995.1	376686.Fjoh_3773	0	993	COG0210@1|root,COG0210@2|Bacteria,4NDWN@976|Bacteroidetes,1HWYD@117743|Flavobacteriia,2NSEZ@237|Flavobacterium	976|Bacteroidetes	L	Helicase	-	-	3.6.4.12	ko:K03657,ko:K03658	ko03420,ko03430,map03420,map03430	-	-	-	ko00000,ko00001,ko01000,ko03400	-	-	-	UvrD-helicase,UvrD_C
WP_129757994.1	880071.Fleli_0018	8.58e-57	187	COG2067@1|root,COG2067@2|Bacteria,4NVVD@976|Bacteroidetes	976|Bacteroidetes	I	long-chain fatty acid transport protein	-	-	-	-	-	-	-	-	-	-	-	-	OMP_b-brl
WP_129757993.1	616991.JPOO01000003_gene2231	1.47e-06	53.5	2ER9K@1|root,330ID@2|Bacteria,4NWBC@976|Bacteroidetes,1I53S@117743|Flavobacteriia	976|Bacteroidetes	S	Domain of unknown function (DUF4468) with TBP-like fold	-	-	-	-	-	-	-	-	-	-	-	-	DUF4468
WP_165352966.1	991.IW20_11060	0.000829	46.2	2ER9K@1|root,330ID@2|Bacteria,4NWBC@976|Bacteroidetes,1I53S@117743|Flavobacteriia	976|Bacteroidetes	S	Domain of unknown function (DUF4468) with TBP-like fold	-	-	-	-	-	-	-	-	-	-	-	-	DUF4468
WP_305069504.1	1233950.IW22_18540	1.12e-06	51.6	2EJI2@1|root,33D8Z@2|Bacteria,4NY4F@976|Bacteroidetes,1I743@117743|Flavobacteriia,3ZSJC@59732|Chryseobacterium	976|Bacteroidetes	-	-	-	-	-	-	-	-	-	-	-	-	-	-	-
WP_129757981.1	991.IW20_12865	3.67e-152	437	COG2259@1|root,COG2259@2|Bacteria,4NFR6@976|Bacteroidetes,1HZI7@117743|Flavobacteriia,2NU4M@237|Flavobacterium	976|Bacteroidetes	S	TQO small subunit DoxA	-	-	1.8.5.2	ko:K16936,ko:K16937	ko00920,ko01120,map00920,map01120	-	R07177	-	ko00000,ko00001,ko01000	3.D.4.9	-	-	DoxA,DoxD
WP_129757970.1	1416760.AYMS01000135_gene994	1.93e-158	449	COG2207@1|root,COG2207@2|Bacteria,4NIWI@976|Bacteroidetes,1I7VV@117743|Flavobacteriia,47GWP@76831|Myroides	976|Bacteroidetes	K	helix_turn_helix, arabinose operon control protein	-	-	-	-	-	-	-	-	-	-	-	-	AraC_binding,HTH_18
WP_129757969.1	1416760.AYMS01000110_gene2932	6.81e-246	680	COG0402@1|root,COG0402@2|Bacteria,4NHHX@976|Bacteroidetes,1HZ45@117743|Flavobacteriia,47HU9@76831|Myroides	976|Bacteroidetes	F	deaminase with metallo-dependent hydrolase domain	-	-	-	-	-	-	-	-	-	-	-	-	Amidohydro_1,Amidohydro_3
WP_129757968.1	1416760.AYMS01000110_gene2931	4.27e-244	679	COG0402@1|root,COG0402@2|Bacteria,4NHHX@976|Bacteroidetes,1HZ45@117743|Flavobacteriia,47HU9@76831|Myroides	976|Bacteroidetes	F	deaminase with metallo-dependent hydrolase domain	-	-	-	-	-	-	-	-	-	-	-	-	Amidohydro_1,Amidohydro_3
WP_129757622.1	1233951.IO90_04465	1.18e-62	194	2B7S6@1|root,320YH@2|Bacteria,4NRVU@976|Bacteroidetes,1I36M@117743|Flavobacteriia	976|Bacteroidetes	S	PFAM Cell wall assembly cell proliferation coordinating protein, KNR4-like	-	-	-	-	-	-	-	-	-	-	-	-	SUKH_6
WP_165352951.1	926559.JoomaDRAFT_2485	2e-26	108	COG3637@1|root,COG3637@2|Bacteria,4NR9K@976|Bacteroidetes,1I34P@117743|Flavobacteriia	976|Bacteroidetes	M	Opacity protein	-	-	-	-	-	-	-	-	-	-	-	-	OMP_b-brl_2
WP_129757634.1	867900.Celly_1725	6.98e-33	118	296X9@1|root,2ZU5Y@2|Bacteria	2|Bacteria	-	-	-	-	-	-	-	-	-	-	-	-	-	-	-
WP_129758930.1	649349.Lbys_0771	1.68e-119	356	COG1018@1|root,COG1018@2|Bacteria,4NF24@976|Bacteroidetes,47KY6@768503|Cytophagia	976|Bacteroidetes	C	PFAM 2Fe-2S iron-sulfur cluster binding domain	paaE	-	-	ko:K02613	ko00360,ko01120,map00360,map01120	-	R09838	RC02690	ko00000,ko00001	-	-	-	FAD_binding_6,Fer2,NAD_binding_1
WP_129758929.1	743722.Sph21_4380	1.71e-39	136	2BZKN@1|root,2ZGII@2|Bacteria,4P9C6@976|Bacteroidetes	976|Bacteroidetes	-	-	-	-	-	-	-	-	-	-	-	-	-	-	-
WP_129758928.1	1550091.JROE01000001_gene4127	4.49e-72	220	2AI29@1|root,318G0@2|Bacteria,4NS17@976|Bacteroidetes,1IXSW@117747|Sphingobacteriia	976|Bacteroidetes	S	Domain of unknown function (DUF4405)	-	-	-	-	-	-	-	-	-	-	-	-	DUF4405
WP_129758927.1	1550091.JROE01000001_gene4128	8.97e-118	339	COG2249@1|root,COG2249@2|Bacteria,4NEUG@976|Bacteroidetes,1IS7D@117747|Sphingobacteriia	976|Bacteroidetes	S	NADPH-dependent FMN reductase	-	-	-	-	-	-	-	-	-	-	-	-	Flavodoxin_2
WP_129758926.1	266748.HY04_02395	1.84e-77	235	COG0454@1|root,COG0456@2|Bacteria,4NNJA@976|Bacteroidetes,1I25Y@117743|Flavobacteriia,3ZRVP@59732|Chryseobacterium	976|Bacteroidetes	K	Acetyltransferase (GNAT) family	-	-	-	-	-	-	-	-	-	-	-	-	Acetyltransf_1
WP_129758925.1	555500.I215_11773	1.17e-102	305	COG1028@1|root,COG1028@2|Bacteria,4NFU6@976|Bacteroidetes,1HYGK@117743|Flavobacteriia	976|Bacteroidetes	IQ	short-chain dehydrogenase	-	-	-	-	-	-	-	-	-	-	-	-	adh_short_C2
WP_129758924.1	1250232.JQNJ01000001_gene3752	8.4e-110	327	COG2207@1|root,COG2207@2|Bacteria,4NDYY@976|Bacteroidetes,1HYQB@117743|Flavobacteriia	976|Bacteroidetes	K	AraC family transcriptional regulator	-	-	-	-	-	-	-	-	-	-	-	-	HTH_18
WP_129758923.1	555500.I215_13098	4.11e-90	268	COG0664@1|root,COG0664@2|Bacteria,4NN9V@976|Bacteroidetes,1I2PU@117743|Flavobacteriia	976|Bacteroidetes	T	cyclic nucleotide-binding	-	-	-	-	-	-	-	-	-	-	-	-	cNMP_binding
WP_305069506.1	1121897.AUGO01000005_gene148	1.86e-25	97.8	COG1733@1|root,COG1733@2|Bacteria,4NNTG@976|Bacteroidetes,1I2BE@117743|Flavobacteriia,2NWJW@237|Flavobacterium	976|Bacteroidetes	K	HxlR family transcriptional regulator	-	-	-	-	-	-	-	-	-	-	-	-	HxlR
WP_129758836.1	313606.M23134_02278	1.43e-12	79.7	COG3386@1|root,COG3405@1|root,COG3386@2|Bacteria,COG3405@2|Bacteria,4PM1B@976|Bacteroidetes,47XZC@768503|Cytophagia	976|Bacteroidetes	G	SPTR Cell surface protein	-	-	-	-	-	-	-	-	-	-	-	-	-
WP_305069507.1	1144313.PMI10_01466	6.15e-12	63.2	COG4270@1|root,COG4270@2|Bacteria,4NQNH@976|Bacteroidetes,1I2M0@117743|Flavobacteriia,2NWUT@237|Flavobacterium	976|Bacteroidetes	S	Membrane	-	-	-	-	-	-	-	-	-	-	-	-	DoxX_2
WP_129758933.1	649349.Lbys_0424	9.46e-79	237	COG3832@1|root,COG3832@2|Bacteria,4NM7P@976|Bacteroidetes,47PYH@768503|Cytophagia	976|Bacteroidetes	S	Activator of Hsp90 ATPase homolog 1-like protein	-	-	-	-	-	-	-	-	-	-	-	-	AHSA1
WP_129758933.1	649349.Lbys_0424	9.46e-79	237	COG3832@1|root,COG3832@2|Bacteria,4NM7P@976|Bacteroidetes,47PYH@768503|Cytophagia	976|Bacteroidetes	S	Activator of Hsp90 ATPase homolog 1-like protein	-	-	-	-	-	-	-	-	-	-	-	-	AHSA1
WP_129758932.1	236814.IX39_16265	1.11e-67	207	COG2259@1|root,31BQE@2|Bacteria,4NQH2@976|Bacteroidetes,1I4G9@117743|Flavobacteriia,3ZRQW@59732|Chryseobacterium	976|Bacteroidetes	S	DoxX-like family	-	-	-	-	-	-	-	-	-	-	-	-	DoxX_2
WP_305069508.1	236814.IX39_16265	1.11e-67	207	COG2259@1|root,31BQE@2|Bacteria,4NQH2@976|Bacteroidetes,1I4G9@117743|Flavobacteriia,3ZRQW@59732|Chryseobacterium	976|Bacteroidetes	S	DoxX-like family	-	-	-	-	-	-	-	-	-	-	-	-	DoxX_2
WP_305069509.1	324057.Pjdr2_6227	2.39e-74	226	2C3KP@1|root,2Z802@2|Bacteria,1TQD1@1239|Firmicutes,4HBGA@91061|Bacilli,26RYU@186822|Paenibacillaceae	91061|Bacilli	S	phage tail protein	yjhE	-	-	-	-	-	-	-	-	-	-	-	-
WP_305069545.1	324057.Pjdr2_6227	2.39e-74	226	2C3KP@1|root,2Z802@2|Bacteria,1TQD1@1239|Firmicutes,4HBGA@91061|Bacilli,26RYU@186822|Paenibacillaceae	91061|Bacilli	S	phage tail protein	yjhE	-	-	-	-	-	-	-	-	-	-	-	-
WP_129758967.1	1338011.BD94_0967	1.52e-62	193	COG0346@1|root,COG0346@2|Bacteria,4NTB6@976|Bacteroidetes,1I9KZ@117743|Flavobacteriia,34RNJ@308865|Elizabethkingia	976|Bacteroidetes	E	lactoylglutathione lyase activity	-	-	-	-	-	-	-	-	-	-	-	-	-
WP_129758968.1	172045.KS04_02175	3.73e-63	195	COG0346@1|root,COG0346@2|Bacteria,4NTB6@976|Bacteroidetes,1I9KZ@117743|Flavobacteriia,34RNJ@308865|Elizabethkingia	976|Bacteroidetes	E	lactoylglutathione lyase activity	-	-	-	-	-	-	-	-	-	-	-	-	-
WP_305069511.1	1229487.AMYW01000006_gene548	4.55e-93	285	COG2267@1|root,COG2267@2|Bacteria,4NNPI@976|Bacteroidetes,1IKJ6@117743|Flavobacteriia,2P045@237|Flavobacterium	976|Bacteroidetes	I	Serine carboxypeptidase S28	-	-	3.4.11.5	ko:K01259	ko00330,map00330	-	R00135	-	ko00000,ko00001,ko01000,ko01002	-	-	-	Abhydrolase_1
WP_305069544.1	1229487.AMYW01000006_gene548	9.14e-93	284	COG2267@1|root,COG2267@2|Bacteria,4NNPI@976|Bacteroidetes,1IKJ6@117743|Flavobacteriia,2P045@237|Flavobacterium	976|Bacteroidetes	I	Serine carboxypeptidase S28	-	-	3.4.11.5	ko:K01259	ko00330,map00330	-	R00135	-	ko00000,ko00001,ko01000,ko01002	-	-	-	Abhydrolase_1
WP_129758914.1	1121895.Q765_02670	2.59e-20	97.8	2DSET@1|root,33FV0@2|Bacteria,4NYIH@976|Bacteroidetes,1ID0M@117743|Flavobacteriia,2NWPB@237|Flavobacterium	976|Bacteroidetes	-	-	-	-	-	-	-	-	-	-	-	-	-	-	-
WP_129758913.1	1121895.Q765_02670	2.51e-20	98.2	2DSET@1|root,33FV0@2|Bacteria,4NYIH@976|Bacteroidetes,1ID0M@117743|Flavobacteriia,2NWPB@237|Flavobacterium	976|Bacteroidetes	-	-	-	-	-	-	-	-	-	-	-	-	-	-	-
WP_129757865.1	1121899.Q764_03195	2.64e-100	305	COG3146@1|root,COG3146@2|Bacteria,4NECI@976|Bacteroidetes,1HY9G@117743|Flavobacteriia,2NSGB@237|Flavobacterium	976|Bacteroidetes	S	Protein conserved in bacteria	-	-	-	-	-	-	-	-	-	-	-	-	Acetyltransf_6
WP_129757869.1	1107311.Q767_11710	3.31e-26	101	COG5658@1|root,COG5658@2|Bacteria,4NUPE@976|Bacteroidetes,1I5QF@117743|Flavobacteriia,2NXQA@237|Flavobacterium	976|Bacteroidetes	S	SdpI/YhfL protein family	-	-	-	-	-	-	-	-	-	-	-	-	SdpI
WP_129757870.1	926559.JoomaDRAFT_3400	2.9e-43	148	COG4194@1|root,COG4194@2|Bacteria,4NPYY@976|Bacteroidetes,1I2QN@117743|Flavobacteriia	976|Bacteroidetes	S	Protein of unknown function (DUF1648)	-	-	-	-	-	-	-	-	-	-	-	-	DUF1648
WP_129757874.1	402612.FP0912	2.49e-19	88.6	2E2JD@1|root,32XNU@2|Bacteria,4NU36@976|Bacteroidetes,1I68Q@117743|Flavobacteriia,2NWV9@237|Flavobacterium	976|Bacteroidetes	-	-	-	-	-	-	-	-	-	-	-	-	-	-	Yip1
WP_129757880.1	1218108.KB908301_gene2391	3.84e-09	56.6	2E4AP@1|root,32Z6C@2|Bacteria,4NWDP@976|Bacteroidetes,1I55P@117743|Flavobacteriia	976|Bacteroidetes	-	-	-	-	-	-	-	-	-	-	-	-	-	-	-
WP_129757898.1	1121898.Q766_09905	3.54e-07	57.4	COG2849@1|root,COG2849@2|Bacteria,4PFJX@976|Bacteroidetes,1I79E@117743|Flavobacteriia	976|Bacteroidetes	S	repeat protein	-	-	-	-	-	-	-	-	-	-	-	-	-
WP_129757919.1	391596.PBAL39_17859	7.08e-09	59.7	2CIIP@1|root,2ZUB9@2|Bacteria,4P89R@976|Bacteroidetes	976|Bacteroidetes	-	-	-	-	-	-	-	-	-	-	-	-	-	-	-
WP_129757930.1	1123008.KB905693_gene1220	2.04e-221	621	COG1680@1|root,COG1680@2|Bacteria,4NI1Z@976|Bacteroidetes,2FUDK@200643|Bacteroidia,22YN2@171551|Porphyromonadaceae	976|Bacteroidetes	V	Beta-lactamase	-	-	3.4.16.4	ko:K01286	-	-	-	-	ko00000,ko01000	-	-	-	Beta-lactamase
WP_129757684.1	1107311.Q767_08930	1.71e-05	48.5	2DQ7V@1|root,3356A@2|Bacteria,4NQ9A@976|Bacteroidetes,1IN33@117743|Flavobacteriia,2NVYR@237|Flavobacterium	976|Bacteroidetes	S	Outer membrane protein beta-barrel domain	-	-	-	-	-	-	-	-	-	-	-	-	OMP_b-brl_2
WP_129757683.1	1107311.Q767_08930	3.28e-13	69.3	2DQ7V@1|root,3356A@2|Bacteria,4NQ9A@976|Bacteroidetes,1IN33@117743|Flavobacteriia,2NVYR@237|Flavobacterium	976|Bacteroidetes	S	Outer membrane protein beta-barrel domain	-	-	-	-	-	-	-	-	-	-	-	-	OMP_b-brl_2
WP_129757678.1	1107311.Q767_03185	1.4e-26	115	COG4935@1|root,COG4935@2|Bacteria	2|Bacteria	O	Belongs to the peptidase S8 family	-	-	-	-	-	-	-	-	-	-	-	-	Inhibitor_I9,P_proprotein,Peptidase_S8
WP_129757677.1	445961.IW15_07720	6.55e-07	58.2	28YC7@1|root,2ZK6U@2|Bacteria,4P8M8@976|Bacteroidetes,1IC0Q@117743|Flavobacteriia	976|Bacteroidetes	-	-	-	-	-	-	-	-	-	-	-	-	-	-	-
WP_129757655.1	1443665.JACA01000007_gene225	1.63e-163	465	2CEBH@1|root,32RZJ@2|Bacteria,4NTYW@976|Bacteroidetes,1I7YT@117743|Flavobacteriia	976|Bacteroidetes	-	-	-	-	-	-	-	-	-	-	-	-	-	-	-
WP_129758959.1	1236976.JCM16418_1383	9.2e-08	58.5	2CI0I@1|root,332G0@2|Bacteria,1VMGK@1239|Firmicutes,4HS1G@91061|Bacilli,271PJ@186822|Paenibacillaceae	91061|Bacilli	S	TIR domain	-	-	-	-	-	-	-	-	-	-	-	-	TIR_2
WP_129758419.1	1349785.BAUG01000066_gene2625	7.92e-05	49.7	COG3064@1|root,COG3064@2|Bacteria,4NM61@976|Bacteroidetes,1I1EC@117743|Flavobacteriia	976|Bacteroidetes	M	Membrane	-	-	-	-	-	-	-	-	-	-	-	-	-
WP_129758457.1	1202532.FF52_10288	9.18e-34	125	COG4974@1|root,COG4974@2|Bacteria,4NIUH@976|Bacteroidetes,1IJET@117743|Flavobacteriia,2P0RR@237|Flavobacterium	976|Bacteroidetes	L	Phage integrase SAM-like domain	-	-	-	-	-	-	-	-	-	-	-	-	Arm-DNA-bind_5,Phage_int_SAM_5,Phage_integrase
WP_129758424.1	1341181.FLJC2902T_26670	1.25e-49	165	COG0526@1|root,COG0526@2|Bacteria,4NR1X@976|Bacteroidetes,1I2WZ@117743|Flavobacteriia,2NW0P@237|Flavobacterium	976|Bacteroidetes	CO	Alkyl hydroperoxide reductase	tlpA	-	-	-	-	-	-	-	-	-	-	-	Redoxin,Thioredoxin_8
WP_129758428.1	1270193.JARP01000001_gene2548	4.18e-41	149	2BNA2@1|root,32GXJ@2|Bacteria,4NQY6@976|Bacteroidetes,1I3VE@117743|Flavobacteriia,2NYIR@237|Flavobacterium	976|Bacteroidetes	-	-	-	-	-	-	-	-	-	-	-	-	-	-	-
WP_129758782.1	929556.Solca_2664	1.04e-120	432	COG2374@1|root,COG3209@1|root,COG3210@1|root,COG3391@1|root,COG4886@1|root,COG4932@1|root,COG5492@1|root,COG2374@2|Bacteria,COG3209@2|Bacteria,COG3210@2|Bacteria,COG3391@2|Bacteria,COG4886@2|Bacteria,COG4932@2|Bacteria,COG5492@2|Bacteria,4PKBQ@976|Bacteroidetes,1IQYI@117747|Sphingobacteriia	976|Bacteroidetes	M	SprB repeat	-	-	-	-	-	-	-	-	-	-	-	-	CHU_C,SdrD_B,SprB
WP_129758780.1	1127692.HMPREF9075_00655	2.6e-21	93.6	2CJ7C@1|root,32ZYU@2|Bacteria,4NUT6@976|Bacteroidetes,1I538@117743|Flavobacteriia,1ERMT@1016|Capnocytophaga	976|Bacteroidetes	-	-	-	-	-	-	-	-	-	-	-	-	-	-	-
WP_129758775.1	1121897.AUGO01000004_gene1007	4.84e-56	198	COG2373@1|root,COG2373@2|Bacteria,4PKR7@976|Bacteroidetes,1HZMS@117743|Flavobacteriia,2NST4@237|Flavobacterium	976|Bacteroidetes	S	CarboxypepD_reg-like domain	-	-	-	-	-	-	-	-	-	-	-	-	CarbopepD_reg_2
WP_129758774.1	290315.Clim_1476	3.1e-92	329	COG1100@1|root,COG4886@1|root,COG1100@2|Bacteria,COG4886@2|Bacteria	2|Bacteria	S	regulation of response to stimulus	-	-	-	ko:K13730	ko05100,map05100	-	-	-	ko00000,ko00001	-	-	-	COR,LRR_4,LRR_8,NB-ARC,Roc,TIR_2,TPR_12,TPR_8
WP_129758770.1	715451.ambt_05375	1.54e-102	326	COG0732@1|root,COG0732@2|Bacteria,1MXVH@1224|Proteobacteria,1S29W@1236|Gammaproteobacteria,467T7@72275|Alteromonadaceae	1236|Gammaproteobacteria	L	COG0732 Restriction endonuclease S subunits	hsdS	-	3.1.21.3	ko:K01154	-	-	-	-	ko00000,ko01000,ko02048	-	-	-	Methylase_S
WP_129758765.1	1008457.BAEX01000012_gene1460	2.71e-38	128	COG0500@1|root,COG0500@2|Bacteria,4NZ1V@976|Bacteroidetes,1IC06@117743|Flavobacteriia	976|Bacteroidetes	Q	methyltransferase	-	-	-	-	-	-	-	-	-	-	-	-	-
WP_129758764.1	1008457.BAEX01000012_gene1461	6.77e-83	249	COG0702@1|root,COG0702@2|Bacteria	2|Bacteria	GM	epimerase	yheG	-	1.1.1.219	ko:K00091	-	-	-	-	ko00000,ko01000	-	-	-	Epimerase,NAD_binding_10
WP_129758763.1	1233950.IW22_24200	4.43e-30	114	2DRK6@1|root,33C58@2|Bacteria,4P7GB@976|Bacteroidetes	976|Bacteroidetes	S	Domain of unknown function (DUF1772)	-	-	-	-	-	-	-	-	-	-	-	-	DUF1772
WP_129758762.1	1008457.BAEX01000012_gene1463	8.69e-175	490	COG2207@1|root,COG2207@2|Bacteria,4NKCU@976|Bacteroidetes,1IIMN@117743|Flavobacteriia	976|Bacteroidetes	K	helix_turn_helix, arabinose operon control protein	-	-	-	-	-	-	-	-	-	-	-	-	HTH_18
WP_129758759.1	1538644.KO02_09615	5.44e-66	204	2E6X0@1|root,2ZKFY@2|Bacteria,4NMC3@976|Bacteroidetes	976|Bacteroidetes	S	Conjugal transfer protein TraB	-	-	-	-	-	-	-	-	-	-	-	-	DUF3408
WP_129757260.1	1121897.AUGO01000007_gene485	2.28e-58	184	298UU@1|root,2ZVYZ@2|Bacteria,4NPH1@976|Bacteroidetes,1I8RV@117743|Flavobacteriia,2NWGH@237|Flavobacterium	976|Bacteroidetes	S	Domain of unknown function (DU1801)	-	-	-	-	-	-	-	-	-	-	-	-	DUF1801
WP_129757255.1	929556.Solca_2290	2.2e-15	78.2	COG0810@1|root,COG0810@2|Bacteria,4NWK2@976|Bacteroidetes,1IWQC@117747|Sphingobacteriia	976|Bacteroidetes	U	Interacts with outer membrane receptor proteins that carry out high-affinity binding and energy dependent uptake into the periplasmic space of specific substrates. It could act to transduce energy from the cytoplasmic membrane to specific energy- requiring processes in the outer membrane, resulting in the release into the periplasm of ligands bound by these outer membrane proteins	-	-	-	ko:K03832	-	-	-	-	ko00000,ko02000	2.C.1.1	-	-	TonB_C
WP_129757236.1	1121895.Q765_08260	4.74e-89	281	COG3577@1|root,COG3577@2|Bacteria,4NMGA@976|Bacteroidetes,1IH37@117743|Flavobacteriia,2NWE1@237|Flavobacterium	976|Bacteroidetes	S	gag-polyprotein putative aspartyl protease	-	-	-	-	-	-	-	-	-	-	-	-	Asp_protease_2
WP_129757235.1	1122621.ATZA01000001_gene1899	3.96e-124	360	COG0330@1|root,COG0330@2|Bacteria	2|Bacteria	O	stress-induced mitochondrial fusion	-	-	-	-	-	-	-	-	-	-	-	-	Band_7
WP_129757230.1	1250006.JHZZ01000001_gene1066	1.39e-23	96.7	2ED2B@1|root,336Z9@2|Bacteria,4NVY5@976|Bacteroidetes,1I5D3@117743|Flavobacteriia	976|Bacteroidetes	-	-	-	-	-	-	-	-	-	-	-	-	-	-	-
WP_235828677.1	929704.Myrod_0590	9.32e-23	100	COG2911@1|root,COG3291@1|root,COG2911@2|Bacteria,COG3291@2|Bacteria,4PHYS@976|Bacteroidetes,1IA2X@117743|Flavobacteriia	976|Bacteroidetes	S	C-terminal domain of CHU protein family	-	-	-	-	-	-	-	-	-	-	-	-	CHU_C
WP_129757216.1	929704.Myrod_3146	4.22e-49	193	COG3291@1|root,COG3291@2|Bacteria,4NM41@976|Bacteroidetes	976|Bacteroidetes	V	Fibronectin type III	-	-	-	-	-	-	-	-	-	-	-	-	CHU_C,Cleaved_Adhesin,MAM,fn3
WP_129757208.1	1347342.BN863_23380	4.49e-214	722	COG2304@1|root,COG3291@1|root,COG3391@1|root,COG2304@2|Bacteria,COG3291@2|Bacteria,COG3391@2|Bacteria,4NDZC@976|Bacteroidetes,1IJ8A@117743|Flavobacteriia	976|Bacteroidetes	G	Pkd domain containing protein	-	-	-	-	-	-	-	-	-	-	-	-	CHU_C,Gal_Lectin,HYR,Laminin_G_3,PKD,SprB,TSP_3
WP_129757207.1	307480.IW16_24670	2.24e-25	98.6	2ERG3@1|root,33J1N@2|Bacteria,4NYJW@976|Bacteroidetes,1I75N@117743|Flavobacteriia,3ZSID@59732|Chryseobacterium	976|Bacteroidetes	S	transposase	-	-	-	-	-	-	-	-	-	-	-	-	-
WP_129757206.1	1121285.AUFK01000018_gene622	1.33e-50	165	2BY07@1|root,34125@2|Bacteria,4P3YD@976|Bacteroidetes,1I9QI@117743|Flavobacteriia,3ZS7J@59732|Chryseobacterium	976|Bacteroidetes	S	Transposase	-	-	-	-	-	-	-	-	-	-	-	-	HTH_7
WP_129757205.1	421531.IX38_11970	2e-15	79.3	COG0582@1|root,COG0582@2|Bacteria,4NDZJ@976|Bacteroidetes,1HZ88@117743|Flavobacteriia,3ZPXX@59732|Chryseobacterium	976|Bacteroidetes	L	Phage integrase SAM-like domain	-	-	-	-	-	-	-	-	-	-	-	-	Phage_int_SAM_5,Phage_integrase
WP_129757204.1	445961.IW15_16110	1.45e-85	268	COG0582@1|root,COG0582@2|Bacteria,4NDZJ@976|Bacteroidetes,1HZ88@117743|Flavobacteriia,3ZPXX@59732|Chryseobacterium	976|Bacteroidetes	L	Phage integrase SAM-like domain	-	-	-	-	-	-	-	-	-	-	-	-	Phage_int_SAM_5,Phage_integrase
WP_129757203.1	1296416.JACB01000033_gene2153	2.75e-49	171	COG3264@1|root,COG3264@2|Bacteria,4PKIA@976|Bacteroidetes,1HX3W@117743|Flavobacteriia,2YI81@290174|Aquimarina	976|Bacteroidetes	M	Conserved TM helix	-	-	-	-	-	-	-	-	-	-	-	-	MS_channel,TM_helix
WP_129757098.1	266748.HY04_05035	1.36e-57	184	COG0457@1|root,COG0457@2|Bacteria,4NSXM@976|Bacteroidetes	976|Bacteroidetes	S	Tetratricopeptide repeat	-	-	-	-	-	-	-	-	-	-	-	-	TPR_2,TPR_8
WP_129757093.1	1406840.Q763_07015	4.38e-134	388	28HQC@1|root,2Z7Y4@2|Bacteria,4NHT4@976|Bacteroidetes,1HXTD@117743|Flavobacteriia,2NSJ4@237|Flavobacterium	976|Bacteroidetes	-	-	-	-	-	-	-	-	-	-	-	-	-	-	-
WP_129757086.1	1218108.KB908294_gene2132	1.5e-43	167	2E779@1|root,331R4@2|Bacteria,4NWSI@976|Bacteroidetes,1I535@117743|Flavobacteriia	976|Bacteroidetes	-	-	-	-	-	-	-	-	-	-	-	-	-	-	-
WP_129757049.1	991.IW20_03800	5.59e-99	299	COG1216@1|root,COG1216@2|Bacteria,4NQ7P@976|Bacteroidetes,1I05T@117743|Flavobacteriia,2NT61@237|Flavobacterium	976|Bacteroidetes	S	glycosyl transferase	-	-	-	-	-	-	-	-	-	-	-	-	Glycos_transf_2
WP_129757048.1	1178825.ALIH01000017_gene658	1.11e-99	302	COG1216@1|root,COG1216@2|Bacteria,4PKGS@976|Bacteroidetes,1IJRT@117743|Flavobacteriia	976|Bacteroidetes	S	Glycosyltransferase like family 2	-	-	-	-	-	-	-	-	-	-	-	-	Glycos_transf_2
WP_129757047.1	1122226.AUHX01000013_gene1288	6.69e-126	374	COG4421@1|root,COG4421@2|Bacteria	2|Bacteria	G	Protein of unknown function (DUF563)	-	-	-	-	-	-	-	-	-	-	-	-	DUF563
WP_129757046.1	1178825.ALIH01000017_gene655	2.78e-75	243	COG0438@1|root,COG0438@2|Bacteria,4NM0R@976|Bacteroidetes,1HX69@117743|Flavobacteriia	976|Bacteroidetes	M	glycosyl transferase group 1	-	-	2.4.1.291	ko:K17248	-	-	-	-	ko00000,ko01000,ko01003	-	GT4	-	Glyco_transf_4,Glycos_transf_1
WP_129756782.1	1229487.AMYW01000033_gene3440	3.3e-57	180	2DMPS@1|root,32SXU@2|Bacteria,4NTIT@976|Bacteroidetes,1I41A@117743|Flavobacteriia,2NWJ3@237|Flavobacterium	976|Bacteroidetes	J	23S rRNA-intervening sequence protein	-	-	-	-	-	-	-	-	-	-	-	-	23S_rRNA_IVP
WP_129756773.1	1392488.JHZY01000002_gene270	2.08e-36	133	2CN03@1|root,32SFX@2|Bacteria,4NSTC@976|Bacteroidetes,1I4Q3@117743|Flavobacteriia	976|Bacteroidetes	-	-	-	-	-	-	-	-	-	-	-	-	-	-	-
WP_129756762.1	1550091.JROE01000006_gene2360	3.45e-26	107	2EMZ6@1|root,33FMC@2|Bacteria,4NZ24@976|Bacteroidetes,1IVSW@117747|Sphingobacteriia	976|Bacteroidetes	-	-	-	-	-	-	-	-	-	-	-	-	-	-	-
WP_129756756.1	1008457.BAEX01000009_gene1383	1e-08	60.5	COG0810@1|root,COG0810@2|Bacteria,4NFH6@976|Bacteroidetes,1IIR5@117743|Flavobacteriia,47I8H@76831|Myroides	976|Bacteroidetes	M	Gram-negative bacterial TonB protein C-terminal	-	-	-	ko:K03832	-	-	-	-	ko00000,ko02000	2.C.1.1	-	-	TonB_C
WP_129756754.1	1121285.AUFK01000012_gene1929	3.96e-65	202	COG0845@1|root,COG0845@2|Bacteria,4NSWM@976|Bacteroidetes,1I1UM@117743|Flavobacteriia,3ZUID@59732|Chryseobacterium	976|Bacteroidetes	M	Protein of unknown function (DUF3347)	-	-	-	-	-	-	-	-	-	-	-	-	DUF3347
WP_129756753.1	743722.Sph21_4776	6.46e-39	130	COG2608@1|root,COG2608@2|Bacteria,4NURN@976|Bacteroidetes,1IUCK@117747|Sphingobacteriia	976|Bacteroidetes	P	Heavy-metal-associated domain	-	-	-	-	-	-	-	-	-	-	-	-	HMA
WP_129756751.1	1410626.JHXB01000025_gene378	2.54e-25	114	COG4096@1|root,COG4096@2|Bacteria,1UT4E@1239|Firmicutes,251AT@186801|Clostridia	186801|Clostridia	V	Type I restriction enzyme R protein N terminus (HSDR_N)	-	-	-	-	-	-	-	-	-	-	-	-	HSDR_N_2
WP_129756749.1	1107311.Q767_12160	9.58e-22	99.4	COG0810@1|root,COG0810@2|Bacteria,4NFH6@976|Bacteroidetes,1IIR5@117743|Flavobacteriia,2NTW7@237|Flavobacterium	976|Bacteroidetes	M	Gram-negative bacterial TonB protein C-terminal	-	-	-	ko:K03832	-	-	-	-	ko00000,ko02000	2.C.1.1	-	-	TonB_C
WP_129756747.1	153721.MYP_2382	9.57e-256	716	COG0477@1|root,COG2814@2|Bacteria,4NG79@976|Bacteroidetes,47PP6@768503|Cytophagia	976|Bacteroidetes	EGP	Major facilitator Superfamily	-	-	-	-	-	-	-	-	-	-	-	-	MFS_1
WP_129756746.1	153721.MYP_2383	9.94e-153	440	COG1566@1|root,COG1566@2|Bacteria,4NEQJ@976|Bacteroidetes,47M5R@768503|Cytophagia	976|Bacteroidetes	V	Biotin-lipoyl like	-	-	-	ko:K03543	-	M00701	-	-	ko00000,ko00002,ko02000	8.A.1.1	-	-	Biotin_lipoyl_2,HlyD_3,HlyD_D23
WP_305069521.1	153721.MYP_2384	2.31e-171	494	COG1538@1|root,COG1538@2|Bacteria,4NIUB@976|Bacteroidetes,47RJM@768503|Cytophagia	976|Bacteroidetes	MU	Outer membrane efflux protein	-	-	-	-	-	-	-	-	-	-	-	-	OEP
WP_129756745.1	153721.MYP_2385	7.21e-133	382	COG4977@1|root,COG4977@2|Bacteria,4NHTS@976|Bacteroidetes,47Q0C@768503|Cytophagia	976|Bacteroidetes	K	helix_turn_helix, arabinose operon control protein	-	-	-	-	-	-	-	-	-	-	-	-	AraC_binding,HTH_18
WP_129756738.1	1189620.AJXL01000012_gene2525	1.43e-234	654	COG2873@1|root,COG2873@2|Bacteria,4NE27@976|Bacteroidetes,1HXJC@117743|Flavobacteriia,2NSFM@237|Flavobacterium	976|Bacteroidetes	E	Catalyzes the formation of L-homocysteine from O- succinyl-L-homoserine (OSHS) and hydrogen sulfide	metY	-	2.5.1.49	ko:K01740	ko00270,ko01100,map00270,map01100	-	R01287,R04859	RC00020,RC02821,RC02848	ko00000,ko00001,ko01000	-	-	-	Cys_Met_Meta_PP
WP_129756737.1	1008457.BAEX01000006_gene902	3.36e-133	388	COG2021@1|root,COG2021@2|Bacteria,4NFG2@976|Bacteroidetes,1HX1W@117743|Flavobacteriia,47HGI@76831|Myroides	976|Bacteroidetes	E	alpha/beta hydrolase fold	metX	-	2.3.1.31	ko:K00641	ko00270,ko01100,ko01130,map00270,map01100,map01130	-	R01776	RC00004,RC00041	ko00000,ko00001,ko01000	-	-	-	Abhydrolase_1
WP_165352927.1	1541065.JRFE01000058_gene5498	2.93e-07	50.8	COG1748@1|root,COG1748@2|Bacteria	2|Bacteria	E	saccharopine dehydrogenase activity	lyS1	-	-	-	-	-	-	-	-	-	-	-	Sacchrp_dh_NADP
WP_129756720.1	1094466.KQS_08880	4.87e-16	88.6	29XAV@1|root,30J0H@2|Bacteria,4PIJC@976|Bacteroidetes,1INBM@117743|Flavobacteriia,2NYZ3@237|Flavobacterium	976|Bacteroidetes	-	-	-	-	-	-	-	-	-	-	-	-	-	-	-
WP_129756711.1	1416760.AYMS01000018_gene1473	0	927	COG4772@1|root,COG4772@2|Bacteria,4PKIU@976|Bacteroidetes,1IJAE@117743|Flavobacteriia,47GUZ@76831|Myroides	976|Bacteroidetes	P	TonB dependent receptor	-	-	-	-	-	-	-	-	-	-	-	-	CarbopepD_reg_2,Plug,TonB_dep_Rec
WP_129756710.1	946077.W5A_00060	5.24e-165	474	COG3291@1|root,COG3291@2|Bacteria,4PKU5@976|Bacteroidetes,1IJEZ@117743|Flavobacteriia	976|Bacteroidetes	S	Pkd domain containing protein	-	-	-	-	-	-	-	-	-	-	-	-	-
WP_129756708.1	1453498.LG45_13680	1.73e-35	134	2DVKX@1|root,33WAY@2|Bacteria,4P3C1@976|Bacteroidetes,1I977@117743|Flavobacteriia	976|Bacteroidetes	-	-	-	-	-	-	-	-	-	-	-	-	-	-	-
WP_129756703.1	1121898.Q766_18310	1.19e-18	85.1	2BTXK@1|root,32P5R@2|Bacteria,4NSMQ@976|Bacteroidetes,1I5J8@117743|Flavobacteriia,2NX4D@237|Flavobacterium	976|Bacteroidetes	-	-	-	-	-	-	-	-	-	-	-	-	-	-	-
WP_305069538.1	1406840.Q763_07800	4.5e-116	414	COG1572@1|root,COG3227@1|root,COG3291@1|root,COG3391@1|root,COG3405@1|root,COG1572@2|Bacteria,COG3227@2|Bacteria,COG3291@2|Bacteria,COG3391@2|Bacteria,COG3405@2|Bacteria,4NWIZ@976|Bacteroidetes,1ICM5@117743|Flavobacteriia,2NVG1@237|Flavobacterium	976|Bacteroidetes	G	Fibronectin type 3 domain	-	-	-	-	-	-	-	-	-	-	-	-	fn3
WP_129756801.1	362418.IW19_15760	2.27e-98	291	COG1738@1|root,COG1738@2|Bacteria,4NNPU@976|Bacteroidetes,1I2GG@117743|Flavobacteriia,2NU67@237|Flavobacterium	976|Bacteroidetes	U	Involved in the import of queuosine (Q) precursors, required for Q precursor salvage	-	-	-	ko:K09125	-	-	-	-	ko00000	-	-	-	Vut_1
WP_129756816.1	445961.IW15_07720	0.000586	49.7	28YC7@1|root,2ZK6U@2|Bacteria,4P8M8@976|Bacteroidetes,1IC0Q@117743|Flavobacteriia	976|Bacteroidetes	-	-	-	-	-	-	-	-	-	-	-	-	-	-	-
WP_129756817.1	1121898.Q766_01690	6.63e-32	130	COG2374@1|root,COG2374@2|Bacteria	2|Bacteria	-	-	-	-	-	ko:K07004	-	-	-	-	ko00000	-	-	-	Big_4,LTD,SLH
WP_129756830.1	1121898.Q766_12640	1.2e-17	91.7	COG0308@1|root,COG0308@2|Bacteria,4PPGU@976|Bacteroidetes,1IKMH@117743|Flavobacteriia,2P0SB@237|Flavobacterium	976|Bacteroidetes	E	CarboxypepD_reg-like domain	-	-	-	-	-	-	-	-	-	-	-	-	CarbopepD_reg_2
WP_129756833.1	1338011.BD94_3438	1.08e-59	192	COG1943@1|root,COG1943@2|Bacteria,4NPWC@976|Bacteroidetes,1I28P@117743|Flavobacteriia,34SC2@308865|Elizabethkingia	976|Bacteroidetes	L	Transposase IS200 like	-	-	-	-	-	-	-	-	-	-	-	-	Y1_Tnp
WP_129756834.1	1034807.FBFL15_1759	8.32e-18	89	COG2304@1|root,COG2304@2|Bacteria,4NKZ6@976|Bacteroidetes,1HZ8Q@117743|Flavobacteriia	976|Bacteroidetes	S	CarboxypepD_reg-like domain	-	-	-	-	-	-	-	-	-	-	-	-	CarbopepD_reg_2
WP_129757551.1	1121898.Q766_01690	6.37e-32	129	COG2374@1|root,COG2374@2|Bacteria	2|Bacteria	-	-	-	-	-	ko:K07004	-	-	-	-	ko00000	-	-	-	Big_4,LTD,SLH
WP_129757552.1	1121898.Q766_01690	4.57e-36	140	COG2374@1|root,COG2374@2|Bacteria	2|Bacteria	-	-	-	-	-	ko:K07004	-	-	-	-	ko00000	-	-	-	Big_4,LTD,SLH
WP_129757576.1	172045.KS04_16265	5.09e-05	45.1	29CPB@1|root,2ZZMK@2|Bacteria,4PFSP@976|Bacteroidetes,1IIDG@117743|Flavobacteriia,34RRY@308865|Elizabethkingia	976|Bacteroidetes	-	-	-	-	-	-	-	-	-	-	-	-	-	-	-
WP_129757596.1	1341155.FSS13T_16540	1.82e-159	452	COG1741@1|root,COG1741@2|Bacteria,4NFZD@976|Bacteroidetes,1HXX4@117743|Flavobacteriia,2NUXP@237|Flavobacterium	976|Bacteroidetes	S	Belongs to the pirin family	-	-	-	ko:K06911	-	-	-	-	ko00000	-	-	-	Pirin,Pirin_C
WP_129757597.1	1550091.JROE01000002_gene909	1.01e-58	187	COG0526@1|root,COG0526@2|Bacteria,4NQHP@976|Bacteroidetes,1J0M1@117747|Sphingobacteriia	976|Bacteroidetes	CO	Thioredoxin-like	-	-	-	-	-	-	-	-	-	-	-	-	Thioredoxin_7
WP_129757600.1	938709.AUSH02000016_gene620	6.13e-81	260	COG2972@1|root,COG2972@2|Bacteria,4NFDP@976|Bacteroidetes	976|Bacteroidetes	T	Histidine kinase	-	-	-	-	-	-	-	-	-	-	-	-	2TM,His_kinase
WP_129757603.1	991.IW20_21625	6.86e-13	72.4	2FKKX@1|root,2ZDK3@2|Bacteria,4P921@976|Bacteroidetes,1IC0Y@117743|Flavobacteriia,2NX1S@237|Flavobacterium	976|Bacteroidetes	-	-	-	-	-	-	-	-	-	-	-	-	-	-	-
WP_099366025.1	1008457.BAEX01000012_gene1459	2.7e-160	453	28KSX@1|root,2ZAA7@2|Bacteria,4NGE9@976|Bacteroidetes,1IIAI@117743|Flavobacteriia	976|Bacteroidetes	S	RteC protein	-	-	-	-	-	-	-	-	-	-	-	-	RteC
WP_099366022.1	1538644.KO02_09615	8.51e-105	303	2E6X0@1|root,2ZKFY@2|Bacteria,4NMC3@976|Bacteroidetes	976|Bacteroidetes	S	Conjugal transfer protein TraB	-	-	-	-	-	-	-	-	-	-	-	-	DUF3408
WP_059333860.1	1461577.CCMH01000018_gene404	3.56e-54	172	2BVDJ@1|root,32QTH@2|Bacteria,4NQEE@976|Bacteroidetes,1I3QI@117743|Flavobacteriia	976|Bacteroidetes	-	-	-	-	-	-	-	-	-	-	-	-	-	-	-
WP_235828642.1	307480.IW16_16495	5.97e-43	149	2DZDV@1|root,32V86@2|Bacteria,4NSNK@976|Bacteroidetes,1I6TK@117743|Flavobacteriia,3ZNMV@59732|Chryseobacterium	976|Bacteroidetes	-	-	-	-	-	-	-	-	-	-	-	-	-	-	-
WP_129757199.1	525257.HMPREF0204_11544	3.35e-83	257	2AHFU@1|root,317T4@2|Bacteria,4NSNV@976|Bacteroidetes,1I5I5@117743|Flavobacteriia,3ZR4J@59732|Chryseobacterium	976|Bacteroidetes	-	-	-	-	-	-	-	-	-	-	-	-	-	-	DUF3324
WP_129757198.1	1216967.L100_12578	4.79e-233	687	COG4932@1|root,COG4932@2|Bacteria,4NH6N@976|Bacteroidetes,1I4ID@117743|Flavobacteriia,34Q74@308865|Elizabethkingia	976|Bacteroidetes	M	domain protein	-	-	-	-	-	-	-	-	-	-	-	-	fn3_3
WP_235828640.1	1500281.JQKZ01000003_gene1636	1.56e-49	165	2DZDV@1|root,33USK@2|Bacteria,4P2EC@976|Bacteroidetes,1I8PU@117743|Flavobacteriia,3ZRMY@59732|Chryseobacterium	976|Bacteroidetes	-	-	-	-	-	-	-	-	-	-	-	-	-	-	-
WP_129757197.1	558152.IQ37_06495	6.5e-46	155	2EK1V@1|root,33DSB@2|Bacteria,4NZR8@976|Bacteroidetes,1I9IA@117743|Flavobacteriia,3ZRYH@59732|Chryseobacterium	976|Bacteroidetes	-	-	-	-	-	-	-	-	-	-	-	-	-	-	-
WP_129757195.1	1035193.HMPREF9073_03086	1.34e-05	49.7	2BVI0@1|root,32QWC@2|Bacteria,4NS1B@976|Bacteroidetes,1I6NM@117743|Flavobacteriia	976|Bacteroidetes	-	-	-	-	-	-	-	-	-	-	-	-	-	-	-
WP_129757194.1	1341181.FLJC2902T_22670	7.54e-273	871	COG3209@1|root,COG3209@2|Bacteria,4NGJF@976|Bacteroidetes,1HYT1@117743|Flavobacteriia,2NTE8@237|Flavobacterium	976|Bacteroidetes	M	RHS repeat-associated core domain protein	-	-	-	-	-	-	-	-	-	-	-	-	RHS_repeat,SpvB,VCBS
WP_129757193.1	1121887.AUDK01000012_gene1615	6.8e-09	58.9	2ETZ4@1|root,33MG8@2|Bacteria,4NZP9@976|Bacteroidetes,1I6QP@117743|Flavobacteriia,2NWQA@237|Flavobacterium	976|Bacteroidetes	-	-	-	-	-	-	-	-	-	-	-	-	-	-	-
WP_129757190.1	1034807.FBFL15_0663	1.77e-79	237	COG0399@1|root,COG0399@2|Bacteria,4NVFZ@976|Bacteroidetes,1I4HI@117743|Flavobacteriia,2P0B0@237|Flavobacterium	976|Bacteroidetes	M	23S rRNA-intervening sequence protein	-	-	-	-	-	-	-	-	-	-	-	-	23S_rRNA_IVP
WP_129757187.1	883096.HMPREF9699_01575	4.33e-48	182	COG3227@1|root,COG3291@1|root,COG3227@2|Bacteria,COG3291@2|Bacteria	2|Bacteria	S	metallopeptidase activity	-	-	3.2.1.4	ko:K01179	ko00500,ko01100,map00500,map01100	-	R06200,R11307,R11308	-	ko00000,ko00001,ko01000	-	GH5,GH9	-	CBM_6,CHU_C,F5_F8_type_C,Glyco_hydro_76,PKD
WP_129757182.1	1121898.Q766_01690	5e-23	105	COG2374@1|root,COG2374@2|Bacteria	2|Bacteria	-	-	-	-	-	ko:K07004	-	-	-	-	ko00000	-	-	-	Big_4,LTD,SLH
WP_129757179.1	1229276.DI53_2966	2.53e-16	78.6	2EPBE@1|root,32PNH@2|Bacteria,4PGV9@976|Bacteroidetes,1IUFN@117747|Sphingobacteriia	976|Bacteroidetes	-	-	-	-	-	-	-	-	-	-	-	-	-	-	-
WP_129758232.1	1229276.DI53_2966	2.31e-17	81.3	2EPBE@1|root,32PNH@2|Bacteria,4PGV9@976|Bacteroidetes,1IUFN@117747|Sphingobacteriia	976|Bacteroidetes	-	-	-	-	-	-	-	-	-	-	-	-	-	-	-
WP_129757154.1	1107311.Q767_08455	3.95e-78	239	2ABZ1@1|root,311GG@2|Bacteria,4NNKH@976|Bacteroidetes,1I2E7@117743|Flavobacteriia,2NYEA@237|Flavobacterium	976|Bacteroidetes	-	-	-	-	-	-	-	-	-	-	-	-	-	-	-
WP_129757147.1	1416760.AYMS01000002_gene1896	2.91e-115	346	COG0438@1|root,COG0438@2|Bacteria,4NIN2@976|Bacteroidetes,1I114@117743|Flavobacteriia	976|Bacteroidetes	M	glycosyl transferase group 1	-	-	-	-	-	-	-	-	-	-	-	-	Glyco_transf_4,Glycos_transf_1
WP_129757143.1	929704.Myrod_1672	9.28e-83	267	COG2244@1|root,COG2244@2|Bacteria,4NNGP@976|Bacteroidetes,1I2E8@117743|Flavobacteriia	976|Bacteroidetes	S	MatE	-	-	-	-	-	-	-	-	-	-	-	-	MatE,Polysacc_synt,Polysacc_synt_C
WP_129757135.1	1406840.Q763_04745	2.73e-57	185	COG1396@1|root,COG1396@2|Bacteria,4NUWD@976|Bacteroidetes,1I521@117743|Flavobacteriia,2P0NI@237|Flavobacterium	976|Bacteroidetes	K	Domain of unknown function (DUF4870)	-	-	-	-	-	-	-	-	-	-	-	-	DUF4870,HTH_3
WP_073312232.1	1120951.AUBG01000014_gene3188	3.58e-38	130	COG1359@1|root,COG1359@2|Bacteria,4NS90@976|Bacteroidetes,1I4AT@117743|Flavobacteriia	976|Bacteroidetes	S	(4S)-4-hydroxy-5-phosphonooxypentane-2,3-dione isomerase activity	-	-	-	-	-	-	-	-	-	-	-	-	-
WP_235828743.1	929703.KE386491_gene3534	6.51e-92	280	COG2207@1|root,COG2207@2|Bacteria,4NF81@976|Bacteroidetes,47QKG@768503|Cytophagia	976|Bacteroidetes	K	helix_turn_helix, arabinose operon control protein	-	-	-	-	-	-	-	-	-	-	-	-	HTH_18
WP_129758954.1	172045.KS04_12195	1.03e-97	310	COG1629@1|root,COG4771@2|Bacteria,4NF4B@976|Bacteroidetes,1HXF4@117743|Flavobacteriia	976|Bacteroidetes	P	TonB-dependent receptor	-	-	-	-	-	-	-	-	-	-	-	-	CarbopepD_reg_2,Plug,TonB_dep_Rec
WP_165353010.1	1122927.KB895412_gene880	1.45e-24	100	COG4319@1|root,COG4319@2|Bacteria,1VVXP@1239|Firmicutes,4HW6F@91061|Bacilli,26YQ1@186822|Paenibacillaceae	91061|Bacilli	S	SnoaL-like domain	-	-	-	-	-	-	-	-	-	-	-	-	DUF4440,SnoaL_3
WP_129758952.1	504472.Slin_2146	5.15e-34	127	COG1846@1|root,COG1846@2|Bacteria	2|Bacteria	K	DNA-binding transcription factor activity	-	-	-	-	-	-	-	-	-	-	-	-	HTH_27,MarR,PRiA4_ORF3
WP_129758961.1	1178825.ALIH01000004_gene2923	8.08e-73	224	COG2318@1|root,COG2318@2|Bacteria,4NP2C@976|Bacteroidetes,1I23S@117743|Flavobacteriia	976|Bacteroidetes	S	DinB superfamily	-	-	-	-	-	-	-	-	-	-	-	-	DinB_2
WP_129758962.1	760192.Halhy_4294	1.67e-44	154	COG0666@1|root,COG0666@2|Bacteria,4P2SK@976|Bacteroidetes	976|Bacteroidetes	S	Ankyrin repeat	-	-	-	-	-	-	-	-	-	-	-	-	-
WP_129758969.1	1121912.AUHD01000026_gene302	4.9e-85	253	COG0454@1|root,COG0456@2|Bacteria,4NQV0@976|Bacteroidetes,1I1XX@117743|Flavobacteriia	976|Bacteroidetes	K	Acetyltransferase (GNAT) domain	-	-	-	-	-	-	-	-	-	-	-	-	Acetyltransf_1,Acetyltransf_10
WP_129758969.1	1121912.AUHD01000026_gene302	4.9e-85	253	COG0454@1|root,COG0456@2|Bacteria,4NQV0@976|Bacteroidetes,1I1XX@117743|Flavobacteriia	976|Bacteroidetes	K	Acetyltransferase (GNAT) domain	-	-	-	-	-	-	-	-	-	-	-	-	Acetyltransf_1,Acetyltransf_10
WP_129758545.1	743722.Sph21_0303	3.39e-115	345	COG4974@1|root,COG4974@2|Bacteria,4NGE1@976|Bacteroidetes,1IRMS@117747|Sphingobacteriia	976|Bacteroidetes	L	Phage integrase, N-terminal SAM-like domain	-	-	-	-	-	-	-	-	-	-	-	-	Phage_int_SAM_4,Phage_integrase
WP_129758550.1	1288963.ADIS_1428	3.16e-13	68.6	294G2@1|root,2ZRVV@2|Bacteria,4P7JJ@976|Bacteroidetes	976|Bacteroidetes	-	-	-	-	-	-	-	-	-	-	-	-	-	-	-
WP_129758558.1	445961.IW15_18310	1.62e-31	121	2EEET@1|root,3388T@2|Bacteria,4NVK9@976|Bacteroidetes,1I61J@117743|Flavobacteriia,3ZU2S@59732|Chryseobacterium	976|Bacteroidetes	-	-	-	-	-	-	-	-	-	-	-	-	-	-	-
WP_129758753.1	1094466.KQS_05985	5.4e-69	211	2CJU0@1|root,33WRA@2|Bacteria,4P3HH@976|Bacteroidetes	976|Bacteroidetes	-	-	-	-	-	-	-	-	-	-	-	-	-	-	-
WP_129758647.1	1300143.CCAV010000008_gene3462	1.67e-205	582	COG2234@1|root,COG2234@2|Bacteria,4NE66@976|Bacteroidetes,1HXV2@117743|Flavobacteriia,3ZPM8@59732|Chryseobacterium	976|Bacteroidetes	S	Peptidase, M28	-	-	-	-	-	-	-	-	-	-	-	-	PA,Peptidase_M28
WP_305069505.1	553177.CAPSP0001_2187	1.66e-157	447	COG3677@1|root,COG3677@2|Bacteria,4PNH2@976|Bacteroidetes,1IMZC@117743|Flavobacteriia,1ERV3@1016|Capnocytophaga	976|Bacteroidetes	L	Transposase	-	-	-	-	-	-	-	-	-	-	-	-	Zn_Tnp_IS1595
WP_129757533.1	553177.CAPSP0001_2187	1.66e-157	447	COG3677@1|root,COG3677@2|Bacteria,4PNH2@976|Bacteroidetes,1IMZC@117743|Flavobacteriia,1ERV3@1016|Capnocytophaga	976|Bacteroidetes	L	Transposase	-	-	-	-	-	-	-	-	-	-	-	-	Zn_Tnp_IS1595
WP_305069505.1	553177.CAPSP0001_2187	1.66e-157	447	COG3677@1|root,COG3677@2|Bacteria,4PNH2@976|Bacteroidetes,1IMZC@117743|Flavobacteriia,1ERV3@1016|Capnocytophaga	976|Bacteroidetes	L	Transposase	-	-	-	-	-	-	-	-	-	-	-	-	Zn_Tnp_IS1595
WP_305069505.1	553177.CAPSP0001_2187	1.66e-157	447	COG3677@1|root,COG3677@2|Bacteria,4PNH2@976|Bacteroidetes,1IMZC@117743|Flavobacteriia,1ERV3@1016|Capnocytophaga	976|Bacteroidetes	L	Transposase	-	-	-	-	-	-	-	-	-	-	-	-	Zn_Tnp_IS1595
WP_305069505.1	553177.CAPSP0001_2187	1.66e-157	447	COG3677@1|root,COG3677@2|Bacteria,4PNH2@976|Bacteroidetes,1IMZC@117743|Flavobacteriia,1ERV3@1016|Capnocytophaga	976|Bacteroidetes	L	Transposase	-	-	-	-	-	-	-	-	-	-	-	-	Zn_Tnp_IS1595
WP_129758300.1	1121890.AUDO01000015_gene2972	7.93e-79	240	COG1704@1|root,COG1704@2|Bacteria,4NMD3@976|Bacteroidetes,1HXSV@117743|Flavobacteriia,2P02T@237|Flavobacterium	976|Bacteroidetes	S	LemA family	lemA	-	-	ko:K03744	-	-	-	-	ko00000	-	-	-	LemA
WP_207209417.1	760192.Halhy_1761	3.4e-19	85.5	COG3943@1|root,COG3943@2|Bacteria,4NEGN@976|Bacteroidetes,1IRCF@117747|Sphingobacteriia	976|Bacteroidetes	S	Virulence protein RhuM family	-	-	-	-	-	-	-	-	-	-	-	-	Virulence_RhuM
WP_165352984.1	1120951.AUBG01000002_gene1307	1.15e-07	50.4	COG5562@1|root,COG5562@2|Bacteria,4NR3A@976|Bacteroidetes,1I3BI@117743|Flavobacteriia	976|Bacteroidetes	S	Phage envelope protein	-	-	-	-	-	-	-	-	-	-	-	-	DUF1398
WP_129758280.1	1341181.FLJC2902T_12350	0.000146	44.7	2A9ZJ@1|root,30Z80@2|Bacteria,4PDCX@976|Bacteroidetes,1INEI@117743|Flavobacteriia,2NZBA@237|Flavobacterium	976|Bacteroidetes	-	-	-	-	-	-	-	-	-	-	-	-	-	-	-
WP_165352980.1	984262.SGRA_2810	1.03e-20	94.4	COG0526@1|root,COG0526@2|Bacteria,4NV4W@976|Bacteroidetes,1IU4Z@117747|Sphingobacteriia	976|Bacteroidetes	CO	alkyl hydroperoxide reductase Thiol specific antioxidant Mal allergen	-	-	-	-	-	-	-	-	-	-	-	-	AhpC-TSA
WP_129757381.1	236814.IX39_06620	4.7e-40	135	COG1359@1|root,COG1359@2|Bacteria,4NVNN@976|Bacteroidetes,1I4N9@117743|Flavobacteriia,3ZS9J@59732|Chryseobacterium	976|Bacteroidetes	S	(4S)-4-hydroxy-5-phosphonooxypentane-2,3-dione isomerase activity	-	-	-	-	-	-	-	-	-	-	-	-	-
WP_129757370.1	1392490.JHZX01000001_gene1807	1.75e-14	76.3	COG1512@1|root,COG1512@2|Bacteria,4NS9C@976|Bacteroidetes,1I3XE@117743|Flavobacteriia	976|Bacteroidetes	S	Beta-propeller domains of methanol dehydrogenase type	-	-	-	ko:K06872	-	-	-	-	ko00000	-	-	-	TPM_phosphatase
WP_305069542.1	1443665.JACA01000005_gene248	1.32e-79	249	COG3209@1|root,COG3209@2|Bacteria,4NE5D@976|Bacteroidetes,1HYTK@117743|Flavobacteriia	976|Bacteroidetes	M	RHS repeat-associated core domain	-	-	-	-	-	-	-	-	-	-	-	-	-
WP_129757351.1	1034807.FBFL15_0112	2.61e-26	100	COG3668@1|root,COG3668@2|Bacteria,4NXUR@976|Bacteroidetes,1I765@117743|Flavobacteriia,2NXQ0@237|Flavobacterium	976|Bacteroidetes	S	Plasmid stabilization system	-	-	-	-	-	-	-	-	-	-	-	-	ParE_toxin
WP_129757350.1	1034807.FBFL15_0113	9.52e-29	105	2ER02@1|root,33IJK@2|Bacteria,4NXQX@976|Bacteroidetes	976|Bacteroidetes	-	-	-	-	-	-	-	-	-	-	-	-	-	-	PhdYeFM_antitox
WP_235828648.1	1121896.JMLU01000004_gene2610	1.31e-122	357	COG0294@1|root,COG0294@2|Bacteria,4NEYJ@976|Bacteroidetes,1HXJ4@117743|Flavobacteriia,2NTN5@237|Flavobacterium	976|Bacteroidetes	H	Catalyzes the condensation of para-aminobenzoate (pABA) with 6-hydroxymethyl-7,8-dihydropterin diphosphate (DHPt-PP) to form 7,8-dihydropteroate (H2Pte), the immediate precursor of folate derivatives	folP	-	2.5.1.15	ko:K00796	ko00790,ko01100,map00790,map01100	M00126,M00841	R03066,R03067	RC00121,RC00842	ko00000,ko00001,ko00002,ko01000	-	-	-	Pterin_bind
WP_129757327.1	1506583.JQJY01000002_gene1282	1.3e-08	58.2	2A9NB@1|root,30YV2@2|Bacteria,4PCTR@976|Bacteroidetes,1IDBS@117743|Flavobacteriia,2NXYU@237|Flavobacterium	976|Bacteroidetes	S	Lipocalin-like domain	-	-	-	-	-	-	-	-	-	-	-	-	Lipocalin_4
WP_129757326.1	655815.ZPR_4685	3.08e-98	291	arCOG06916@1|root,30456@2|Bacteria,4NNYX@976|Bacteroidetes,1I4MG@117743|Flavobacteriia	976|Bacteroidetes	S	Domain of unknown function (DUF4276)	-	-	-	-	-	-	-	-	-	-	-	-	DUF4276
WP_129757325.1	655815.ZPR_4684	1.53e-181	513	COG4637@1|root,COG4637@2|Bacteria,4NFTD@976|Bacteroidetes,1HY8M@117743|Flavobacteriia	976|Bacteroidetes	S	AAA ATPase domain	-	-	-	-	-	-	-	-	-	-	-	-	AAA_15,AAA_21,DUF2813
WP_129757307.1	1461577.CCMH01000005_gene1836	0	2269	COG3513@1|root,COG3513@2|Bacteria,4NFM9@976|Bacteroidetes,1HYZN@117743|Flavobacteriia	976|Bacteroidetes	L	CRISPR (clustered regularly interspaced short palindromic repeat) is an adaptive immune system that provides protection against mobile genetic elements (viruses, transposable elements and conjugative plasmids). CRISPR clusters contain spacers, sequences complementary to antecedent mobile elements, and target invading nucleic acids. CRISPR clusters are transcribed and processed into CRISPR RNA (cr…	cas9	-	-	ko:K09952	-	-	-	-	ko00000,ko01000,ko02048	-	-	-	Cas9-BH,HNH_4
WP_129757815.1	860228.Ccan_00080	1.5e-90	278	COG4823@1|root,COG4823@2|Bacteria,4NN89@976|Bacteroidetes,1I15E@117743|Flavobacteriia,1ERYI@1016|Capnocytophaga	976|Bacteroidetes	V	Abi-like protein	-	-	-	-	-	-	-	-	-	-	-	-	Abi_2
WP_129757816.1	1249975.JQLP01000005_gene2551	6.59e-178	503	2DB9A@1|root,2Z7VI@2|Bacteria,4NJ4U@976|Bacteroidetes,1HXKW@117743|Flavobacteriia	976|Bacteroidetes	S	Adenine-specific methyltransferase EcoRI	-	-	-	-	-	-	-	-	-	-	-	-	EcoRI_methylase
WP_129757817.1	1453500.AT05_01480	1.64e-103	310	2C3DT@1|root,32RC5@2|Bacteria,4NRZ0@976|Bacteroidetes,1IA4T@117743|Flavobacteriia	976|Bacteroidetes	-	-	-	-	-	-	-	-	-	-	-	-	-	-	-
WP_129757818.1	1034807.FBFL15_0247	1.37e-211	590	COG1403@1|root,COG1479@1|root,COG1403@2|Bacteria,COG1479@2|Bacteria,4NGH2@976|Bacteroidetes,1I71P@117743|Flavobacteriia	976|Bacteroidetes	V	Protein of unknown function DUF262	-	-	-	-	-	-	-	-	-	-	-	-	DUF262,HNH
WP_129757840.1	1416760.AYMS01000032_gene2370	1.7e-34	127	2BZXP@1|root,32WKM@2|Bacteria,4NTUI@976|Bacteroidetes,1I70Y@117743|Flavobacteriia,47IAC@76831|Myroides	976|Bacteroidetes	-	-	-	-	-	-	-	-	-	-	-	-	-	-	-
WP_305069526.1	1089547.KB913013_gene3944	7.64e-118	423	COG1874@1|root,COG2911@1|root,COG3209@1|root,COG3656@1|root,COG1874@2|Bacteria,COG2911@2|Bacteria,COG3209@2|Bacteria,COG3656@2|Bacteria,4PKBQ@976|Bacteroidetes,47XXU@768503|Cytophagia	976|Bacteroidetes	M	SprB repeat	-	-	-	-	-	-	-	-	-	-	-	-	CHU_C,SdrD_B,SprB
WP_305069534.1	1089547.KB913013_gene3944	6.89e-120	425	COG1874@1|root,COG2911@1|root,COG3209@1|root,COG3656@1|root,COG1874@2|Bacteria,COG2911@2|Bacteria,COG3209@2|Bacteria,COG3656@2|Bacteria,4PKBQ@976|Bacteroidetes,47XXU@768503|Cytophagia	976|Bacteroidetes	M	SprB repeat	-	-	-	-	-	-	-	-	-	-	-	-	CHU_C,SdrD_B,SprB
WP_129758593.1	985255.APHJ01000025_gene1122	8.31e-07	54.7	28STS@1|root,2ZF3H@2|Bacteria,4P7YZ@976|Bacteroidetes,1IBCW@117743|Flavobacteriia	976|Bacteroidetes	-	-	-	-	-	-	-	-	-	-	-	-	-	-	-
WP_129758599.1	762903.Pedsa_1984	0	879	COG0589@1|root,COG1914@1|root,COG0589@2|Bacteria,COG1914@2|Bacteria,4NENE@976|Bacteroidetes,1IQIP@117747|Sphingobacteriia	976|Bacteroidetes	P	H( )-stimulated, divalent metal cation uptake system	mntH	-	-	ko:K03322	-	-	-	-	ko00000,ko02000	2.A.55.2.6,2.A.55.3	-	-	Nramp,Usp
WP_165352993.1	1121887.AUDK01000012_gene1606	6.9e-32	118	COG2143@1|root,COG2143@2|Bacteria,4NTTQ@976|Bacteroidetes,1I5XT@117743|Flavobacteriia,2NVYD@237|Flavobacterium	976|Bacteroidetes	O	COG2143 Thioredoxin-related protein	-	-	-	-	-	-	-	-	-	-	-	-	Thioredoxin_2,Thioredoxin_7
WP_129758609.1	929704.Myrod_1603	9.92e-58	195	COG0526@1|root,COG0526@2|Bacteria	2|Bacteria	CO	cell redox homeostasis	-	-	-	ko:K12057	-	-	-	-	ko00000,ko02044	3.A.7.11.1	-	-	Thioredoxin,Thioredoxin_9
WP_129757429.1	1500281.JQKZ01000021_gene2703	7.4e-18	82	2C597@1|root,334FM@2|Bacteria,4NVTN@976|Bacteroidetes,1I5XN@117743|Flavobacteriia,3ZSDY@59732|Chryseobacterium	976|Bacteroidetes	-	-	-	-	-	-	-	-	-	-	-	-	-	-	-
WP_207209403.1	929704.Myrod_2807	5.56e-21	87.8	2EGUW@1|root,33AM2@2|Bacteria,4NYJY@976|Bacteroidetes,1I6Q6@117743|Flavobacteriia	976|Bacteroidetes	-	-	-	-	-	-	-	-	-	-	-	-	-	-	-
WP_129758509.1	929704.Myrod_2807	1.48e-23	94.4	2EGUW@1|root,33AM2@2|Bacteria,4NYJY@976|Bacteroidetes,1I6Q6@117743|Flavobacteriia	976|Bacteroidetes	-	-	-	-	-	-	-	-	-	-	-	-	-	-	-
WP_129757430.1	376686.Fjoh_3729	6.01e-235	728	COG3209@1|root,COG3209@2|Bacteria,4NE5D@976|Bacteroidetes,1HYTK@117743|Flavobacteriia,2NSHK@237|Flavobacterium	976|Bacteroidetes	M	RHS repeat-associated core domain	-	-	-	-	-	-	-	-	-	-	-	-	-
WP_305069540.1	421531.IX38_11970	1.34e-136	404	COG0582@1|root,COG0582@2|Bacteria,4NDZJ@976|Bacteroidetes,1HZ88@117743|Flavobacteriia,3ZPXX@59732|Chryseobacterium	976|Bacteroidetes	L	Phage integrase SAM-like domain	-	-	-	-	-	-	-	-	-	-	-	-	Phage_int_SAM_5,Phage_integrase
WP_129757434.1	743722.Sph21_3564	1.67e-76	231	28M8P@1|root,32UH2@2|Bacteria,4NT3C@976|Bacteroidetes,1IWCH@117747|Sphingobacteriia	976|Bacteroidetes	S	Domain of unknown function, B. Theta Gene description (DUF3872)	-	-	-	-	-	-	-	-	-	-	-	-	DUF3872
WP_129757435.1	925409.KI911562_gene1970	1.67e-103	302	28JX5@1|root,2Z9MM@2|Bacteria,4NGMG@976|Bacteroidetes,1IWYB@117747|Sphingobacteriia	976|Bacteroidetes	S	Conjugative transposon protein TraO	-	-	-	-	-	-	-	-	-	-	-	-	TraO
WP_129757437.1	1233950.IW22_14120	6.45e-205	580	28HNW@1|root,2Z7X2@2|Bacteria,4NG2R@976|Bacteroidetes,1HXA3@117743|Flavobacteriia,3ZR2X@59732|Chryseobacterium	976|Bacteroidetes	S	Conjugative transposon, TraM	traM	-	-	-	-	-	-	-	-	-	-	-	Transposon_TraM
WP_129757438.1	1233950.IW22_14115	1.73e-28	105	2BR4P@1|root,33VP8@2|Bacteria,4P347@976|Bacteroidetes,1I9BZ@117743|Flavobacteriia,3ZS8U@59732|Chryseobacterium	976|Bacteroidetes	-	-	-	-	-	-	-	-	-	-	-	-	-	-	-
WP_129757440.1	762903.Pedsa_1680	1.92e-182	514	28IE2@1|root,2Z8G6@2|Bacteria,4NFI5@976|Bacteroidetes,1IVQT@117747|Sphingobacteriia	976|Bacteroidetes	S	Homologues of TraJ from Bacteroides conjugative transposon	traJ	-	-	-	-	-	-	-	-	-	-	-	CtnDOT_TraJ
WP_129757446.1	926562.Oweho_3417	7.86e-93	282	COG1502@1|root,COG1502@2|Bacteria	2|Bacteria	I	Catalyzes the reversible phosphatidyl group transfer from one phosphatidylglycerol molecule to another to form cardiolipin (CL) (diphosphatidylglycerol) and glycerol	-	-	-	ko:K06131	ko00564,ko01100,map00564,map01100	-	R07390	RC00017	ko00000,ko00001,ko01000	-	-	-	AAA_11,AAA_12,PLDc_2,Sulfotransfer_3
WP_129757447.1	1500281.JQKZ01000001_gene1185	4.7e-92	274	2E4K1@1|root,32ZF0@2|Bacteria,4PGDD@976|Bacteroidetes,1IH8F@117743|Flavobacteriia,3ZTE8@59732|Chryseobacterium	976|Bacteroidetes	-	-	-	-	-	-	-	-	-	-	-	-	-	-	-
WP_129757448.1	645991.Sgly_0848	0	1610	COG0610@1|root,COG0610@2|Bacteria,1TP7S@1239|Firmicutes,248A6@186801|Clostridia,2610J@186807|Peptococcaceae	186801|Clostridia	V	Subunit R is required for both nuclease and ATPase activities, but not for modification	-	-	3.1.21.3	ko:K01153	-	-	-	-	ko00000,ko01000,ko02048	-	-	-	DUF3387,HSDR_N,ResIII
WP_129757449.1	645991.Sgly_0847	5.32e-172	488	2BW0K@1|root,2Z9YA@2|Bacteria	2|Bacteria	-	-	-	-	-	-	-	-	-	-	-	-	-	-	-
WP_129757450.1	1313421.JHBV01000048_gene153	3.7e-151	443	COG0732@1|root,COG0732@2|Bacteria,4PIJ5@976|Bacteroidetes,1IY0E@117747|Sphingobacteriia	976|Bacteroidetes	V	type I restriction modification DNA specificity domain	-	-	-	-	-	-	-	-	-	-	-	-	-
WP_129757451.1	391596.PBAL39_04473	5.96e-267	769	COG0419@1|root,COG0419@2|Bacteria,4PMP8@976|Bacteroidetes	976|Bacteroidetes	L	ATPase involved in DNA repair	-	-	-	-	-	-	-	-	-	-	-	-	AAA_13,AAA_21,AAA_23
WP_129757452.1	645991.Sgly_0845	0	1064	COG0286@1|root,COG0286@2|Bacteria,1TPGZ@1239|Firmicutes,247RY@186801|Clostridia,26092@186807|Peptococcaceae	186801|Clostridia	V	PFAM N-6 DNA methylase	-	-	2.1.1.72	ko:K03427	-	-	-	-	ko00000,ko01000,ko02048	-	-	-	HsdM_N,N6_Mtase
WP_129757453.1	391596.PBAL39_19140	7.28e-33	114	COG1476@1|root,COG1476@2|Bacteria,4NV6T@976|Bacteroidetes,1IUFG@117747|Sphingobacteriia	976|Bacteroidetes	K	Cro/C1-type HTH DNA-binding domain	-	-	-	-	-	-	-	-	-	-	-	-	HTH_26,HTH_3
WP_129757454.1	926556.Echvi_3226	1.89e-87	263	28JRR@1|root,2Z9HA@2|Bacteria,4NGXT@976|Bacteroidetes,47UDT@768503|Cytophagia	976|Bacteroidetes	S	Conjugal transfer protein TraD	-	-	-	-	-	-	-	-	-	-	-	-	-
WP_129757456.1	1218108.KB908308_gene211	1.23e-47	153	2E6X0@1|root,335FF@2|Bacteria,4NV4Y@976|Bacteroidetes,1I9RH@117743|Flavobacteriia	976|Bacteroidetes	S	Protein of unknown function (DUF3408)	-	-	-	-	-	-	-	-	-	-	-	-	DUF3408
WP_129757457.1	1218108.KB908308_gene210	3.12e-65	202	2E6X0@1|root,30IUG@2|Bacteria,4NP1V@976|Bacteroidetes,1I31S@117743|Flavobacteriia	976|Bacteroidetes	S	Protein of unknown function (DUF3408)	-	-	-	-	-	-	-	-	-	-	-	-	DUF3408
WP_129757460.1	525373.HMPREF0766_14155	2.54e-226	633	COG3843@1|root,COG3843@2|Bacteria,4NG66@976|Bacteroidetes,1IRND@117747|Sphingobacteriia	976|Bacteroidetes	U	Relaxase mobilization nuclease	-	-	-	-	-	-	-	-	-	-	-	-	Relaxase
WP_129757461.1	445961.IW15_07720	5.83e-06	55.1	28YC7@1|root,2ZK6U@2|Bacteria,4P8M8@976|Bacteroidetes,1IC0Q@117743|Flavobacteriia	976|Bacteroidetes	-	-	-	-	-	-	-	-	-	-	-	-	-	-	-
WP_129757462.1	525257.HMPREF0204_15214	3.48e-111	327	COG0639@1|root,COG0639@2|Bacteria,4NEQW@976|Bacteroidetes,1HWXJ@117743|Flavobacteriia,3ZNUB@59732|Chryseobacterium	976|Bacteroidetes	T	Calcineurin-like phosphoesterase superfamily domain	-	-	3.1.3.16	ko:K07313	-	-	-	-	ko00000,ko01000	-	-	-	Metallophos
WP_207209404.1	1270196.JCKI01000006_gene2564	3.17e-51	168	COG3093@1|root,COG3093@2|Bacteria,4NMVH@976|Bacteroidetes,1IT7H@117747|Sphingobacteriia	976|Bacteroidetes	K	plasmid maintenance system antidote protein	-	-	-	ko:K21498	-	-	-	-	ko00000,ko02048	-	-	-	HTH_3
WP_129757464.1	491205.JARQ01000001_gene692	5.47e-94	280	COG2253@1|root,COG2253@2|Bacteria,4NUAF@976|Bacteroidetes,1I773@117743|Flavobacteriia,3ZSJ2@59732|Chryseobacterium	976|Bacteroidetes	S	Nucleotidyl transferase AbiEii toxin, Type IV TA system	-	-	-	-	-	-	-	-	-	-	-	-	AbiEii
WP_129757465.1	525257.HMPREF0204_15144	9.85e-55	179	COG1595@1|root,COG1595@2|Bacteria,4NSV9@976|Bacteroidetes,1I4SV@117743|Flavobacteriia	976|Bacteroidetes	K	RNA polymerase sigma factor, sigma-70 family	-	-	-	ko:K03088	-	-	-	-	ko00000,ko03021	-	-	-	GerE,Sigma70_r2,Sigma70_r4_2
WP_129757466.1	1346330.M472_00150	1.7e-66	223	COG3712@1|root,COG3712@2|Bacteria	2|Bacteria	PT	iron ion homeostasis	-	-	-	-	-	-	-	-	-	-	-	-	DUF4974,FecR
WP_129757467.1	1408813.AYMG01000020_gene3045	0	1011	COG1629@1|root,COG1629@2|Bacteria,4NDXS@976|Bacteroidetes,1IP0D@117747|Sphingobacteriia	976|Bacteroidetes	P	TonB-dependent receptor plug	-	-	-	-	-	-	-	-	-	-	-	-	CarbopepD_reg_2,Plug,TonB_dep_Rec
WP_129757468.1	1408813.AYMG01000020_gene3046	1.38e-118	361	COG1834@1|root,COG1834@2|Bacteria,4NE18@976|Bacteroidetes,1IPR8@117747|Sphingobacteriia	976|Bacteroidetes	E	PFAM SusD family	-	-	-	ko:K21572	-	-	-	-	ko00000,ko02000	8.A.46.1,8.A.46.3	-	-	SusD-like_3,SusD_RagB
WP_129757469.1	1408813.AYMG01000020_gene3047	6.94e-31	132	COG0526@1|root,COG0526@2|Bacteria,4NTH5@976|Bacteroidetes,1ITDW@117747|Sphingobacteriia	976|Bacteroidetes	O	PFAM alkyl hydroperoxide reductase Thiol specific antioxidant Mal allergen	-	-	-	-	-	-	-	-	-	-	-	-	AhpC-TSA,Thioredoxin_8
WP_129757472.1	926556.Echvi_1954	4.29e-21	98.2	COG3279@1|root,COG3279@2|Bacteria,4NSF2@976|Bacteroidetes,47S7R@768503|Cytophagia	976|Bacteroidetes	KT	PFAM LytTr DNA-binding	-	-	-	-	-	-	-	-	-	-	-	-	LytTR
WP_129757473.1	714943.Mucpa_0101	1.95e-13	69.3	28W71@1|root,2ZI7P@2|Bacteria,4P7TW@976|Bacteroidetes,1IZWR@117747|Sphingobacteriia	976|Bacteroidetes	-	-	-	-	-	-	-	-	-	-	-	-	-	-	-
WP_129757477.1	1218108.KB908297_gene3010	0	1044	COG0550@1|root,COG0550@2|Bacteria,4NE6R@976|Bacteroidetes,1HWYU@117743|Flavobacteriia	976|Bacteroidetes	L	DNA topoisomerase	-	-	5.99.1.2	ko:K03169	-	-	-	-	ko00000,ko01000,ko03032	-	-	-	Topoisom_bac,Toprim,Toprim_Crpt
WP_129757478.1	172045.KS04_19125	4.73e-250	697	2CI0Q@1|root,2Z86V@2|Bacteria,4NEAY@976|Bacteroidetes,1HX3J@117743|Flavobacteriia	976|Bacteroidetes	S	Protein of unknown function (DUF4099)	-	-	-	-	-	-	-	-	-	-	-	-	DUF3945,DUF4099
WP_129757479.1	1121887.AUDK01000010_gene1357	1.1e-42	142	2D42G@1|root,32TG4@2|Bacteria,4NSVJ@976|Bacteroidetes,1I4NC@117743|Flavobacteriia,2NX1D@237|Flavobacterium	976|Bacteroidetes	S	Helix-turn-helix domain	-	-	-	-	-	-	-	-	-	-	-	-	HTH_17
WP_129757480.1	1406840.Q763_09700	9.34e-71	235	2E8Z7@1|root,34AH2@2|Bacteria,4P5J4@976|Bacteroidetes,1I86W@117743|Flavobacteriia,2NT9C@237|Flavobacterium	976|Bacteroidetes	-	-	-	-	-	-	-	-	-	-	-	-	-	-	-
WP_129757481.1	926556.Echvi_1369	5.57e-37	140	COG3279@1|root,COG3279@2|Bacteria,4NSF2@976|Bacteroidetes,47S7R@768503|Cytophagia	976|Bacteroidetes	KT	PFAM LytTr DNA-binding	-	-	-	-	-	-	-	-	-	-	-	-	LytTR
WP_129757482.1	1408813.AYMG01000020_gene3042	2.57e-09	58.5	28W71@1|root,2ZI7P@2|Bacteria,4P7TW@976|Bacteroidetes,1IZWR@117747|Sphingobacteriia	976|Bacteroidetes	-	-	-	-	-	-	-	-	-	-	-	-	-	-	-
WP_129757483.1	525373.HMPREF0766_12558	1.21e-40	135	2E3D7@1|root,32YCE@2|Bacteria,4NVGT@976|Bacteroidetes,1IZ80@117747|Sphingobacteriia	976|Bacteroidetes	S	Helix-turn-helix domain	-	-	-	-	-	-	-	-	-	-	-	-	HTH_17
WP_129757484.1	525373.HMPREF0766_12557	4.61e-223	623	COG0582@1|root,COG0582@2|Bacteria,4NDZJ@976|Bacteroidetes,1IPS6@117747|Sphingobacteriia	976|Bacteroidetes	L	Belongs to the 'phage' integrase family	-	-	-	-	-	-	-	-	-	-	-	-	Arm-DNA-bind_5,Phage_int_SAM_5,Phage_integrase
WP_235828653.1	1233951.IO90_09105	9.9e-129	369	2CJP6@1|root,2Z7MS@2|Bacteria,4NJDB@976|Bacteroidetes,1I0M2@117743|Flavobacteriia	976|Bacteroidetes	L	Eco47II restriction endonuclease	-	-	-	-	-	-	-	-	-	-	-	-	RE_Eco47II
WP_207209406.1	1233951.IO90_09100	1.37e-257	711	COG0270@1|root,COG0789@1|root,COG0270@2|Bacteria,COG0789@2|Bacteria,4NG9A@976|Bacteroidetes,1HZAK@117743|Flavobacteriia,3HJ39@358033|Chryseobacterium	976|Bacteroidetes	H	C-5 cytosine-specific DNA methylase	-	-	2.1.1.37	ko:K00558	ko00270,ko01100,ko05206,map00270,map01100,map05206	M00035	R04858	RC00003,RC00332	ko00000,ko00001,ko00002,ko01000,ko02048,ko03032,ko03036	-	-	-	DNA_methylase,HTH_17,MerR,MerR_1
WP_129757500.1	1121287.AUMU01000001_gene1549	5.09e-74	227	COG1670@1|root,COG1670@2|Bacteria,4NR3B@976|Bacteroidetes,1I4X3@117743|Flavobacteriia,3ZRWN@59732|Chryseobacterium	976|Bacteroidetes	J	Acetyltransferase (GNAT) domain	-	-	-	-	-	-	-	-	-	-	-	-	Acetyltransf_3
WP_165352948.1	1347342.BN863_3040	2.33e-08	62.8	COG3203@1|root,COG3203@2|Bacteria,4PKBJ@976|Bacteroidetes,1HYG6@117743|Flavobacteriia	976|Bacteroidetes	M	CarboxypepD_reg-like domain	-	-	-	-	-	-	-	-	-	-	-	-	CarbopepD_reg_2
WP_129758539.1	445961.IW15_13475	4.07e-111	325	COG0500@1|root,COG2226@2|Bacteria,4NJH4@976|Bacteroidetes,1I1ND@117743|Flavobacteriia,3ZTCR@59732|Chryseobacterium	976|Bacteroidetes	Q	ubiE/COQ5 methyltransferase family	-	-	2.1.1.163,2.1.1.201	ko:K03183	ko00130,ko01100,ko01110,map00130,map01100,map01110	M00116,M00117	R04990,R04993,R06859,R08774,R09736	RC00003,RC01253,RC01662	ko00000,ko00001,ko00002,ko01000	-	-	-	Ubie_methyltran
WP_129758535.1	1046627.BZARG_396	5.85e-79	241	COG0454@1|root,COG0456@2|Bacteria,4NPAS@976|Bacteroidetes,1I2M6@117743|Flavobacteriia	976|Bacteroidetes	K	Acetyltransferase (GNAT) family	-	-	-	-	-	-	-	-	-	-	-	-	Acetyltransf_1,Acetyltransf_10,Acetyltransf_7
WP_129758517.1	1120965.AUBV01000017_gene191	1.56e-38	131	COG3620@1|root,COG3620@2|Bacteria,4NQCR@976|Bacteroidetes,47QE7@768503|Cytophagia	976|Bacteroidetes	K	Helix-turn-helix domain	-	-	-	-	-	-	-	-	-	-	-	-	HTH_3
WP_129758516.1	1189612.A33Q_2273	1.4e-47	155	COG4679@1|root,COG4679@2|Bacteria,4NPPR@976|Bacteroidetes,47Q24@768503|Cytophagia	976|Bacteroidetes	S	Phage derived protein Gp49-like (DUF891)	-	-	-	-	-	-	-	-	-	-	-	-	Gp49
WP_207209402.1	616991.JPOO01000001_gene4055	3.91e-144	416	COG3464@1|root,COG3464@2|Bacteria,4NFK7@976|Bacteroidetes,1HX8S@117743|Flavobacteriia,23I4B@178469|Arenibacter	976|Bacteroidetes	L	Transposase	-	-	-	-	-	-	-	-	-	-	-	-	DDE_Tnp_ISL3
WP_207209402.1	616991.JPOO01000001_gene4055	3.91e-144	416	COG3464@1|root,COG3464@2|Bacteria,4NFK7@976|Bacteroidetes,1HX8S@117743|Flavobacteriia,23I4B@178469|Arenibacter	976|Bacteroidetes	L	Transposase	-	-	-	-	-	-	-	-	-	-	-	-	DDE_Tnp_ISL3
WP_207209402.1	616991.JPOO01000001_gene4055	3.91e-144	416	COG3464@1|root,COG3464@2|Bacteria,4NFK7@976|Bacteroidetes,1HX8S@117743|Flavobacteriia,23I4B@178469|Arenibacter	976|Bacteroidetes	L	Transposase	-	-	-	-	-	-	-	-	-	-	-	-	DDE_Tnp_ISL3
WP_207209402.1	616991.JPOO01000001_gene4055	3.91e-144	416	COG3464@1|root,COG3464@2|Bacteria,4NFK7@976|Bacteroidetes,1HX8S@117743|Flavobacteriia,23I4B@178469|Arenibacter	976|Bacteroidetes	L	Transposase	-	-	-	-	-	-	-	-	-	-	-	-	DDE_Tnp_ISL3
WP_207209402.1	616991.JPOO01000001_gene4055	3.91e-144	416	COG3464@1|root,COG3464@2|Bacteria,4NFK7@976|Bacteroidetes,1HX8S@117743|Flavobacteriia,23I4B@178469|Arenibacter	976|Bacteroidetes	L	Transposase	-	-	-	-	-	-	-	-	-	-	-	-	DDE_Tnp_ISL3
WP_207209402.1	616991.JPOO01000001_gene4055	3.91e-144	416	COG3464@1|root,COG3464@2|Bacteria,4NFK7@976|Bacteroidetes,1HX8S@117743|Flavobacteriia,23I4B@178469|Arenibacter	976|Bacteroidetes	L	Transposase	-	-	-	-	-	-	-	-	-	-	-	-	DDE_Tnp_ISL3
WP_207209402.1	616991.JPOO01000001_gene4055	3.91e-144	416	COG3464@1|root,COG3464@2|Bacteria,4NFK7@976|Bacteroidetes,1HX8S@117743|Flavobacteriia,23I4B@178469|Arenibacter	976|Bacteroidetes	L	Transposase	-	-	-	-	-	-	-	-	-	-	-	-	DDE_Tnp_ISL3
WP_305069514.1	1041826.FCOL_11420	3.41e-56	177	COG3464@1|root,COG3464@2|Bacteria,4NNMJ@976|Bacteroidetes,1I3B3@117743|Flavobacteriia,2NX1V@237|Flavobacterium	976|Bacteroidetes	L	Transposase	-	-	-	-	-	-	-	-	-	-	-	-	-
WP_305069514.1	1041826.FCOL_11420	3.41e-56	177	COG3464@1|root,COG3464@2|Bacteria,4NNMJ@976|Bacteroidetes,1I3B3@117743|Flavobacteriia,2NX1V@237|Flavobacterium	976|Bacteroidetes	L	Transposase	-	-	-	-	-	-	-	-	-	-	-	-	-
WP_305069514.1	1041826.FCOL_11420	3.41e-56	177	COG3464@1|root,COG3464@2|Bacteria,4NNMJ@976|Bacteroidetes,1I3B3@117743|Flavobacteriia,2NX1V@237|Flavobacterium	976|Bacteroidetes	L	Transposase	-	-	-	-	-	-	-	-	-	-	-	-	-
WP_305069514.1	1041826.FCOL_11420	3.41e-56	177	COG3464@1|root,COG3464@2|Bacteria,4NNMJ@976|Bacteroidetes,1I3B3@117743|Flavobacteriia,2NX1V@237|Flavobacterium	976|Bacteroidetes	L	Transposase	-	-	-	-	-	-	-	-	-	-	-	-	-
WP_305069514.1	1041826.FCOL_11420	3.41e-56	177	COG3464@1|root,COG3464@2|Bacteria,4NNMJ@976|Bacteroidetes,1I3B3@117743|Flavobacteriia,2NX1V@237|Flavobacterium	976|Bacteroidetes	L	Transposase	-	-	-	-	-	-	-	-	-	-	-	-	-
WP_305069514.1	1041826.FCOL_11420	3.41e-56	177	COG3464@1|root,COG3464@2|Bacteria,4NNMJ@976|Bacteroidetes,1I3B3@117743|Flavobacteriia,2NX1V@237|Flavobacterium	976|Bacteroidetes	L	Transposase	-	-	-	-	-	-	-	-	-	-	-	-	-
WP_165353009.1	1121899.Q764_11545	4.61e-31	115	COG3184@1|root,COG3184@2|Bacteria,4NQ9V@976|Bacteroidetes,1I3P7@117743|Flavobacteriia,2P077@237|Flavobacterium	976|Bacteroidetes	S	Uncharacterized protein conserved in bacteria (DUF2059)	-	-	-	ko:K09924	-	-	-	-	ko00000	-	-	-	DUF2059
WP_129758888.1	391598.FBBAL38_06055	2.6e-38	142	2B7AU@1|root,320DW@2|Bacteria,4NQKJ@976|Bacteroidetes,1I313@117743|Flavobacteriia	976|Bacteroidetes	S	Domain of unknown function (DUF4292)	-	-	-	-	-	-	-	-	-	-	-	-	DUF4292
WP_129758730.1	485917.Phep_0213	7.13e-08	63.2	COG0810@1|root,COG1629@1|root,COG4219@1|root,COG0810@2|Bacteria,COG4219@2|Bacteria,COG4771@2|Bacteria,4NDWS@976|Bacteroidetes,1IRNZ@117747|Sphingobacteriia	976|Bacteroidetes	KMT	BlaR1 peptidase M56	-	-	-	-	-	-	-	-	-	-	-	-	CarbopepD_reg_2,Peptidase_M56,Plug,TonB_C
WP_165353000.1	1392488.JHZY01000002_gene545	5.87e-94	284	2DV70@1|root,33UEQ@2|Bacteria,4P2F9@976|Bacteroidetes,1I8PD@117743|Flavobacteriia	976|Bacteroidetes	S	Tetratricopeptide repeat	-	-	-	-	-	-	-	-	-	-	-	-	TPR_19
WP_129758742.1	1121887.AUDK01000002_gene2034	1.21e-10	62.8	COG3385@1|root,COG3385@2|Bacteria,4NG39@976|Bacteroidetes,1HY95@117743|Flavobacteriia	976|Bacteroidetes	L	Pfam Transposase DDE domain	-	-	-	-	-	-	-	-	-	-	-	-	DDE_Tnp_1,DUF4372
WP_129758743.1	1121870.AUAA01000035_gene112	5.08e-62	201	COG3385@1|root,COG3385@2|Bacteria,4NG39@976|Bacteroidetes,1HY95@117743|Flavobacteriia	976|Bacteroidetes	L	Pfam Transposase DDE domain	-	-	-	-	-	-	-	-	-	-	-	-	DDE_Tnp_1,DUF4372
WP_129758746.1	929704.Myrod_0240	2.49e-110	351	COG0018@1|root,COG0018@2|Bacteria,4PFTV@976|Bacteroidetes,1IM04@117743|Flavobacteriia,47IPD@76831|Myroides	976|Bacteroidetes	J	arginyl-trna synthetase	-	-	-	-	-	-	-	-	-	-	-	-	-
WP_129757954.1	319236.JCM19294_2286	2.55e-94	307	COG1401@1|root,COG2947@1|root,COG1401@2|Bacteria,COG2947@2|Bacteria,4NEEG@976|Bacteroidetes,1HZEM@117743|Flavobacteriia,3HM2A@363408|Nonlabens	976|Bacteroidetes	V	AAA domain (dynein-related subfamily)	-	-	-	ko:K07452	-	-	-	-	ko00000,ko01000,ko02048	-	-	-	AAA_5,EVE
WP_129758191.1	314345.SPV1_06274	4.64e-42	153	2CYQJ@1|root,32T4M@2|Bacteria	2|Bacteria	-	-	-	-	-	-	-	-	-	-	-	-	-	-	-
WP_129758165.1	694427.Palpr_0714	4.33e-76	237	2E9DH@1|root,333M2@2|Bacteria,4NWWJ@976|Bacteroidetes	976|Bacteroidetes	-	-	-	-	-	-	-	-	-	-	-	-	-	-	-
WP_129758144.1	391598.FBBAL38_00940	1.55e-22	95.5	2EG8M@1|root,33A0F@2|Bacteria,4NZDA@976|Bacteroidetes,1I6TQ@117743|Flavobacteriia	976|Bacteroidetes	-	-	-	-	-	-	-	-	-	-	-	-	-	-	-
WP_129758133.1	1406840.Q763_07010	3.26e-70	228	COG0438@1|root,COG0438@2|Bacteria,4PMHE@976|Bacteroidetes,1IJT3@117743|Flavobacteriia,2NVSJ@237|Flavobacterium	976|Bacteroidetes	M	transferase activity, transferring glycosyl groups	-	-	-	-	-	-	-	-	-	-	-	-	-
WP_129758132.1	1406840.Q763_07010	2.74e-72	233	COG0438@1|root,COG0438@2|Bacteria,4PMHE@976|Bacteroidetes,1IJT3@117743|Flavobacteriia,2NVSJ@237|Flavobacterium	976|Bacteroidetes	M	transferase activity, transferring glycosyl groups	-	-	-	-	-	-	-	-	-	-	-	-	-
WP_165352944.1	1121898.Q766_07770	1.94e-123	385	COG1520@1|root,COG1520@2|Bacteria,4NRYC@976|Bacteroidetes,1I3IV@117743|Flavobacteriia,2NSFE@237|Flavobacterium	976|Bacteroidetes	S	Part of the outer membrane protein assembly complex, which is involved in assembly and insertion of beta-barrel proteins into the outer membrane	-	-	-	-	-	-	-	-	-	-	-	-	-
WP_129757285.1	1121897.AUGO01000009_gene2904	1.79e-38	141	COG2197@1|root,COG2197@2|Bacteria,4NR5M@976|Bacteroidetes,1HYNZ@117743|Flavobacteriia,2NX0F@237|Flavobacterium	976|Bacteroidetes	K	helix_turn_helix, Lux Regulon	-	-	-	-	-	-	-	-	-	-	-	-	GerE,PAS_3
WP_129757282.1	1461577.CCMH01000014_gene623	2.47e-66	214	2DSJQ@1|root,33GEY@2|Bacteria,4NXNB@976|Bacteroidetes,1I71A@117743|Flavobacteriia	976|Bacteroidetes	-	-	-	-	-	-	-	-	-	-	-	-	-	-	-
WP_129757280.1	236814.IX39_00605	2.81e-30	113	2CPJB@1|root,32SJ9@2|Bacteria,4PFZS@976|Bacteroidetes,1IGW3@117743|Flavobacteriia,3ZS2P@59732|Chryseobacterium	976|Bacteroidetes	-	-	-	-	-	-	-	-	-	-	-	-	-	-	-
WP_305069543.1	1341181.FLJC2902T_13660	3.8e-37	129	COG0454@1|root,COG0456@2|Bacteria,4NSPT@976|Bacteroidetes,1I4MD@117743|Flavobacteriia,2NWJI@237|Flavobacterium	976|Bacteroidetes	K	acetyltransferase	-	-	-	-	-	-	-	-	-	-	-	-	Acetyltransf_7
WP_129758651.1	1144313.PMI10_00065	2.91e-94	278	COG0454@1|root,COG0456@2|Bacteria,4NP1E@976|Bacteroidetes,1I26T@117743|Flavobacteriia,2NW1A@237|Flavobacterium	976|Bacteroidetes	K	Acetyltransferase (GNAT) domain	-	-	2.3.1.57	ko:K22441	-	-	-	-	ko00000,ko01000	-	-	-	Acetyltransf_1
WP_129758652.1	376686.Fjoh_3622	5.34e-64	196	2DMN6@1|root,32SM9@2|Bacteria,4NXMI@976|Bacteroidetes	976|Bacteroidetes	-	-	-	-	-	-	-	-	-	-	-	-	-	-	-
WP_129758653.1	376686.Fjoh_3621	9.65e-104	306	COG2253@1|root,COG2253@2|Bacteria,4NQ2B@976|Bacteroidetes,1I4QA@117743|Flavobacteriia,2P0AF@237|Flavobacterium	976|Bacteroidetes	S	Nucleotidyl transferase AbiEii toxin, Type IV TA system	-	-	-	-	-	-	-	-	-	-	-	-	AbiEii
WP_165352997.1	525257.HMPREF0204_12334	2.07e-06	46.6	2ABVU@1|root,311CU@2|Bacteria,4PG5Q@976|Bacteroidetes,1IH16@117743|Flavobacteriia,3ZSSA@59732|Chryseobacterium	976|Bacteroidetes	-	-	-	-	-	-	-	-	-	-	-	-	-	-	-
WP_123247948.1	1461577.CCMH01000011_gene1793	1.44e-79	236	2E4R3@1|root,32ZJN@2|Bacteria,4NVRS@976|Bacteroidetes,1I96Q@117743|Flavobacteriia	976|Bacteroidetes	-	-	-	-	-	-	-	-	-	-	-	-	-	-	-
WP_129758660.1	1461577.CCMH01000011_gene1792	1.24e-86	254	2EBPR@1|root,335PU@2|Bacteria,4NVWA@976|Bacteroidetes,1I5H9@117743|Flavobacteriia	976|Bacteroidetes	-	-	-	-	-	-	-	-	-	-	-	-	-	-	-
WP_369417914.1	1121897.AUGO01000005_gene137	5.75e-21	90.9	28KSX@1|root,2ZAA7@2|Bacteria,4NGE9@976|Bacteroidetes,1HYGG@117743|Flavobacteriia,2NT9Z@237|Flavobacterium	976|Bacteroidetes	S	RteC protein	-	-	-	-	-	-	-	-	-	-	-	-	RteC
WP_369417915.1	1538644.KO02_15230	8.42e-88	266	28KSX@1|root,2ZAA7@2|Bacteria,4NGE9@976|Bacteroidetes,1ISDG@117747|Sphingobacteriia	976|Bacteroidetes	S	Tetracycline regulation of excision, RteC	-	-	-	-	-	-	-	-	-	-	-	-	RteC
WP_129757783.1	1121286.AUMT01000002_gene1592	2.3e-122	354	COG0351@1|root,COG0351@2|Bacteria,4NE0F@976|Bacteroidetes,1I2PM@117743|Flavobacteriia,3ZUC4@59732|Chryseobacterium	976|Bacteroidetes	H	Phosphomethylpyrimidine kinase	thiD	-	2.7.1.49,2.7.4.7	ko:K00941	ko00730,ko01100,map00730,map01100	M00127	R03471,R04509	RC00002,RC00017	ko00000,ko00001,ko00002,ko01000	-	-	-	Phos_pyr_kin
WP_129757784.1	1121286.AUMT01000002_gene1591	1.09e-101	298	COG0352@1|root,COG0352@2|Bacteria,4NRDR@976|Bacteroidetes,1I374@117743|Flavobacteriia,3ZP2J@59732|Chryseobacterium	976|Bacteroidetes	H	Thiamine monophosphate synthase	thiE	-	2.5.1.3	ko:K00788	ko00730,ko01100,map00730,map01100	M00127	R03223,R10712	RC00224,RC03255,RC03397	ko00000,ko00001,ko00002,ko01000	-	-	-	TMP-TENI
WP_129757786.1	1229276.DI53_2900	7.46e-25	98.2	2E40F@1|root,32YX9@2|Bacteria,4NV5X@976|Bacteroidetes,1IYTN@117747|Sphingobacteriia	976|Bacteroidetes	-	-	-	-	-	-	-	-	-	-	-	-	-	-	-
WP_129757787.1	1195236.CTER_0417	4.64e-15	76.3	COG0189@1|root,COG0769@1|root,COG0189@2|Bacteria,COG0769@2|Bacteria,1V3WY@1239|Firmicutes,249AA@186801|Clostridia,3WHSJ@541000|Ruminococcaceae	186801|Clostridia	HJM	Mur ligase middle domain	cphA	-	6.3.2.29,6.3.2.30	ko:K03802	-	-	-	-	ko00000,ko01000	-	-	-	Mur_ligase_C,Mur_ligase_M,RimK
WP_129757789.1	1121897.AUGO01000007_gene338	1.69e-16	73.6	2A9JC@1|root,30YRR@2|Bacteria,4PCNT@976|Bacteroidetes,1ID7K@117743|Flavobacteriia,2NXM4@237|Flavobacterium	976|Bacteroidetes	-	-	-	-	-	-	-	-	-	-	-	-	-	-	-
WP_129757791.1	1239415.CM001837_gene1551	1.32e-12	73.9	2A2IY@1|root,30QWN@2|Bacteria,4PD4M@976|Bacteroidetes,1INAN@117743|Flavobacteriia,37FPI@326319|Dokdonia	976|Bacteroidetes	-	-	-	-	-	-	-	-	-	-	-	-	-	-	-
WP_129756658.1	319236.JCM19294_2271	1.1e-31	123	2A6SE@1|root,30VKM@2|Bacteria,4PDV3@976|Bacteroidetes,1IE8J@117743|Flavobacteriia,3HM8W@363408|Nonlabens	976|Bacteroidetes	-	-	-	-	-	-	-	-	-	-	-	-	-	-	-
WP_129756641.1	929704.Myrod_1706	3.47e-31	120	COG3637@1|root,COG3637@2|Bacteria,4NQQ0@976|Bacteroidetes,1I2VU@117743|Flavobacteriia	976|Bacteroidetes	M	Outer membrane protein beta-barrel domain	-	-	-	-	-	-	-	-	-	-	-	-	OMP_b-brl,OMP_b-brl_2
WP_129756636.1	362418.IW19_08070	4.03e-17	79	2DSA9@1|root,33F82@2|Bacteria,4NYNX@976|Bacteroidetes,1ID97@117743|Flavobacteriia,2NXS0@237|Flavobacterium	976|Bacteroidetes	-	-	-	-	-	-	-	-	-	-	-	-	-	-	-
WP_129756634.1	745718.JADT01000004_gene1245	4.05e-17	90.9	COG3468@1|root,COG3468@2|Bacteria,4NEVR@976|Bacteroidetes,1HXUP@117743|Flavobacteriia	976|Bacteroidetes	MU	outer membrane autotransporter barrel domain protein	-	-	-	-	-	-	-	-	-	-	-	-	OMP_b-brl,OMP_b-brl_2
WP_235828607.1	525373.HMPREF0766_14029	1.61e-107	322	COG0668@1|root,COG0668@2|Bacteria,4NEPW@976|Bacteroidetes,1IT38@117747|Sphingobacteriia	976|Bacteroidetes	M	mechanosensitive ion channel	-	-	-	ko:K03442	-	-	-	-	ko00000,ko02000	1.A.23.2	-	-	MS_channel,TM_helix
WP_129756615.1	402612.FP2448	1.43e-34	129	2C8KU@1|root,30Z72@2|Bacteria,4PDBK@976|Bacteroidetes,1IDUG@117743|Flavobacteriia,2NZ8I@237|Flavobacterium	976|Bacteroidetes	-	-	-	-	-	-	-	-	-	-	-	-	-	-	-
WP_129756609.1	1094466.KQS_00665	1.45e-47	155	2DNS7@1|root,32YWC@2|Bacteria,4NSJ6@976|Bacteroidetes,1I44S@117743|Flavobacteriia,2NWET@237|Flavobacterium	976|Bacteroidetes	J	S23 ribosomal protein	-	-	-	-	-	-	-	-	-	-	-	-	23S_rRNA_IVP

## Sheet: Table_S3
Table S3. List of clusters from the TCH3-2-specific genes.
No.	Accessions (# same accessions)*	#Genes	Annotation
1	WP_207209402.1 (7)	7	Transposase
2	WP_129758008.1 (1)	2	Secretion system C-terminal sorting domain
	WP_129758006.1 (1)
3	WP_129757551.1 (1)	2	Secretion system C-terminal sorting domain
	WP_129757552.1 (1)
4	WP_305069511.1 (1)	2	pip; proline iminopeptidase
	WP_305069544.1 (1)
5	WP_129758969.1 (2)	2	N-acetylglutamate synthase or related acetyltransferase, GNAT family
6	WP_305069505.1 (4)	5	IS1595 family transposase
	WP_129757533.1 (1)
7	WP_305069509.1 (1)	2	Hypothetical
	WP_305069545.1 (1)
8	WP_129758967.1 (1)	2	Hypothetical
	WP_129758968.1 (1)
9	WP_129757179.1 (1)	2	Hypothetical
	WP_129758232.1 (1)
10	WP_207209403.1 (1)	2	Hypothetical
	WP_129758509.1 (1)
11	WP_305069514.1 (6)	6	Hypothetical
12	WP_305069526.1 (1)	2	Glycine rich protein/Hypothetical
	WP_305069534.1 (1)
13	WP_129758932.1 (1)	2	DoxX-like family
	WP_305069508.1 (1)
14	WP_369417907.1 (1)	2	Domain of unknown function (DUF4180)
	WP_129758469.1 (1)
15	WP_235828677.1 (1)	2	CHU_C Type IX secretion signal domain
	WP_129757216.1 (1)
16	WP_129758933.1 (2)	2	Chalcone/flavanone-binding protein YndB, AHSA1/START/SRPBCC domain
*Composition of each cluster was shown with name and the number of the unique NCBI accessions.

## Sheet: Table_S4
Table S4. The list of OTUs in all samples
#OTU ID	3w_En_Con_A1	3w_En_Con_A10	3w_En_Con_A2	3w_En_Con_A3	3w_En_Con_A4	3w_En_Con_A5	3w_En_Con_A6	3w_En_Con_A7	3w_En_Con_A8	3w_En_Con_A9	3w_En_TCH_A11	3w_En_TCH_A12	3w_En_TCH_B1	3w_En_TCH_B2	3w_En_TCH_B3	3w_En_TCH_B4	3w_En_TCH_B5	3w_En_TCH_B6	3w_En_TCH_B7	3w_En_TCH_B8	3w_Rh_Con_1	3w_Rh_Con_10	3w_Rh_Con_2	3w_Rh_Con_3	3w_Rh_Con_4	3w_Rh_Con_5	3w_Rh_Con_6	3w_Rh_Con_7	3w_Rh_Con_8	3w_Rh_Con_9	3w_Rh_TCH_1	3w_Rh_TCH_10	3w_Rh_TCH_2	3w_Rh_TCH_3	3w_Rh_TCH_4	3w_Rh_TCH_5	3w_Rh_TCH_6	3w_Rh_TCH_7	3w_Rh_TCH_8	3w_Rh_TCH_9	5w_En_Con_A1	5w_En_Con_A2	5w_En_Con_A3	5w_En_Con_A4	5w_En_Con_A5	5w_En_Con_A6	5w_En_Con_A7	5w_En_Con_A8	5w_En_Con_H7
OTU0001	0	0	0	0	0	0	0	0	0	0	0	0	0	0	0	0	0	0	0	0	0	0	0	6	0	0	0	0	0	0	0	2	0	0	0	0	0	0	0	0	0	0	0	0	0	0	0	0	0
OTU0002	0	0	0	0	0	0	0	0	0	0	0	0	0	0	0	0	0	0	0	0	0	0	0	0	0	0	0	0	0	0	0	0	0	0	0	0	0	0	0	39	0	0	0	0	37	0	0	0	0
OTU0003	0	0	0	0	0	0	0	0	0	0	0	0	0	0	0	0	0	0	0	0	0	0	0	0	9	0	12	11	0	10	0	0	0	0	6	0	0	0	0	0	0	0	0	0	0	0	0	0	0
OTU0004	0	0	0	0	0	0	0	0	0	0	0	0	0	0	0	0	0	0	0	0	0	0	0	0	0	0	7	0	0	0	0	6	5	0	6	26	0	9	0	8	0	0	0	0	0	0	0	0	0
OTU0005	0	0	0	0	0	0	0	0	0	0	0	0	0	0	0	0	0	0	0	0	0	0	0	0	0	0	0	0	0	0	0	0	0	13	0	0	0	20	0	0	12	0	0	0	0	0	0	0	0
OTU0006	0	0	0	0	0	0	0	0	0	0	0	0	0	0	0	0	0	0	0	0	100	104	86	74	73	100	75	69	120	119	83	103	119	72	78	93	136	109	83	132	0	0	0	0	0	0	0	0	0
OTU0007	0	0	0	0	0	0	0	0	0	0	0	0	0	0	0	0	0	0	0	0	0	0	8	0	0	0	0	17	0	0	0	0	0	0	11	0	0	14	0	16	0	0	0	0	0	0	0	0	0
OTU0008	0	0	0	0	0	0	0	0	0	0	0	0	0	0	0	0	0	0	0	0	60	0	0	0	0	0	17	0	0	0	0	0	0	0	0	0	0	0	0	15	0	0	0	0	0	10	0	0	0
OTU0009	0	0	0	0	0	0	0	0	0	0	0	0	0	0	0	0	0	0	0	0	0	0	0	0	0	0	0	0	0	0	0	0	0	0	0	13	0	0	0	0	0	0	0	0	0	0	0	0	0
OTU0010	0	0	0	0	0	0	0	0	0	0	0	0	0	0	0	0	0	0	0	0	0	0	0	0	0	0	0	0	0	0	0	0	0	0	0	0	0	0	0	0	0	0	21	0	0	25	0	0	0
OTU0011	0	0	0	0	0	0	0	0	0	0	0	0	0	0	0	0	0	0	0	0	0	0	0	0	0	3	0	0	0	6	0	0	7	0	0	0	5	0	4	0	0	0	0	0	0	0	0	0	0
OTU0012	0	0	0	0	0	0	0	0	0	0	0	0	0	0	0	0	0	0	0	0	0	0	0	0	0	0	0	0	0	0	0	0	0	0	0	0	0	0	0	0	0	0	12	0	0	21	0	0	0
OTU0013	0	0	0	0	0	0	0	0	0	0	0	0	0	0	0	0	0	0	0	0	14	30	19	0	17	23	31	0	0	0	0	17	0	0	23	20	31	0	17	22	0	0	0	0	0	0	0	0	0
OTU0014	0	0	0	0	0	0	0	0	0	0	12	0	0	0	0	0	0	0	0	0	4	0	0	0	0	0	0	0	0	0	0	0	0	0	0	0	0	0	0	0	0	0	7	0	0	0	0	0	0
OTU0015	0	0	0	0	0	7	0	0	0	0	0	0	0	0	0	0	0	0	0	0	10	0	0	0	10	0	11	11	0	0	0	0	0	11	0	9	9	0	17	0	0	0	0	0	0	0	0	0	0
OTU0016	0	0	0	0	0	0	0	0	0	0	0	0	0	0	0	0	0	0	0	0	0	0	0	0	0	0	0	0	0	0	0	0	0	0	0	0	0	0	0	0	0	0	0	0	0	0	0	0	0
OTU0017	0	0	0	0	0	0	0	0	0	0	0	0	0	0	0	0	0	0	0	0	0	0	0	0	0	0	0	0	0	0	0	0	0	0	0	0	0	0	5	0	0	0	0	0	0	0	0	0	0
OTU0018	0	0	0	0	0	0	0	0	0	0	0	0	0	0	0	0	0	0	0	0	0	0	0	0	0	0	0	0	16	0	0	0	0	0	0	0	0	0	10	0	0	0	0	0	0	0	0	0	0
OTU0019	0	0	0	0	0	0	0	0	0	22	0	0	26	0	0	0	0	0	0	0	0	0	0	0	0	0	0	0	0	0	0	16	19	0	0	0	0	30	0	0	0	0	0	0	0	0	0	0	0
OTU0020	0	0	0	0	0	0	0	0	0	0	0	0	0	0	0	0	0	0	0	0	17	0	0	23	27	24	38	0	21	0	14	0	0	19	0	0	0	0	32	0	0	0	0	7	0	0	0	0	0
OTU0021	0	0	0	0	0	0	0	0	0	0	0	0	0	0	0	0	0	0	0	36	0	0	0	0	0	20	0	0	0	18	0	102	44	28	0	0	0	0	12	0	0	0	21	0	0	93	0	0	0
OTU0022	0	0	0	0	0	0	0	0	0	0	0	0	0	0	0	0	0	0	0	0	0	0	0	0	0	0	0	0	0	0	0	0	0	0	0	0	0	0	0	0	0	13	0	0	0	0	0	0	36
OTU0023	0	0	0	0	0	0	0	0	0	0	0	0	0	0	0	0	0	0	0	0	0	0	0	0	0	0	0	0	0	0	0	0	0	0	0	0	0	0	7	0	0	0	0	0	0	0	0	0	8
OTU0024	0	0	0	0	77	0	0	0	0	0	0	0	0	0	0	0	0	0	0	0	0	0	0	0	0	0	0	0	0	9	0	0	0	0	0	0	0	0	0	0	0	0	0	0	0	0	0	0	35
OTU0025	0	0	0	0	0	0	0	0	0	0	0	0	0	0	0	0	0	0	0	0	0	0	5	0	0	0	0	12	0	0	0	0	0	0	0	27	0	0	0	15	0	0	0	0	0	0	0	0	0
OTU0026	0	0	0	0	0	0	0	0	0	0	0	0	0	0	0	0	0	0	0	0	0	0	0	0	0	0	0	0	3	0	0	0	0	0	0	0	0	0	0	0	0	0	7	0	0	0	0	0	0
OTU0027	0	0	0	0	0	0	0	0	0	0	0	0	0	43	0	0	0	0	0	62	0	0	0	0	0	0	0	0	0	0	2	0	0	0	0	0	16	0	62	21	0	0	0	0	0	0	0	0	0
OTU0028	0	0	0	0	0	0	0	0	0	0	0	0	0	0	0	0	0	0	0	0	0	0	0	0	0	13	10	5	0	16	0	0	6	0	0	0	0	6	0	15	0	0	0	0	0	0	0	0	0
OTU0029	0	0	0	0	0	0	0	10	0	0	0	0	0	0	0	0	0	0	0	0	0	0	0	0	0	0	0	0	0	0	0	0	0	0	0	0	0	0	0	0	0	0	0	0	0	0	0	0	0
OTU0030	0	0	0	0	0	0	0	0	0	0	0	0	0	0	0	0	0	0	0	0	0	0	0	0	0	0	0	0	0	0	0	0	0	0	0	0	0	6	0	0	0	0	0	0	0	0	0	0	0
OTU0031	0	0	0	0	28	0	0	0	0	0	0	0	0	0	0	0	0	0	0	0	0	0	0	0	0	0	0	0	0	0	0	0	0	0	0	0	0	0	0	0	0	0	0	0	0	0	0	0	0
OTU0032	0	0	0	0	0	0	0	0	0	0	0	0	0	35	0	0	0	0	0	0	59	83	89	83	81	85	71	89	100	100	58	57	100	113	86	80	118	128	111	96	0	0	0	0	0	0	0	0	0
OTU0033	0	0	0	0	0	0	0	0	0	0	0	0	0	0	0	0	0	0	0	0	0	0	0	7	0	0	0	0	0	0	0	0	0	0	0	0	0	0	0	0	0	0	0	0	0	0	0	0	0
OTU0034	0	0	0	0	0	0	0	0	0	0	0	0	0	0	0	0	0	0	0	0	0	27	0	0	0	15	0	15	0	19	0	0	9	0	12	18	15	17	0	21	0	0	0	0	0	0	0	0	0
OTU0035	0	0	0	0	0	0	0	0	0	0	0	0	0	0	0	0	0	0	0	0	0	0	0	0	0	0	0	0	0	0	0	0	0	0	0	0	0	0	0	0	0	7	0	14	0	0	0	0	0
OTU0036	0	0	0	0	0	0	13	0	0	0	0	0	14	0	0	0	0	0	33	0	0	0	0	0	0	0	0	0	0	0	0	0	0	0	0	0	0	0	0	0	11	0	0	0	0	0	0	0	0
OTU0037	0	0	0	20	0	0	0	0	0	0	0	0	0	0	0	0	0	5	0	0	0	0	0	0	0	0	0	0	0	0	0	0	0	0	0	0	0	0	0	0	0	0	0	0	0	0	0	0	0
OTU0038	0	0	0	0	0	0	0	0	0	0	0	0	0	0	0	0	0	0	0	0	13	24	15	23	19	0	20	0	18	27	14	0	19	17	13	16	29	16	21	0	0	0	0	0	0	0	0	0	0
OTU0039	91	215	0	84	22	87	24	18	37	94	0	6	62	29	120	62	0	69	0	46	24	29	31	30	38	37	46	20	39	47	17	20	16	29	2	28	43	0	23	43	0	31	131	0	0	0	0	29	0
OTU0040	0	0	0	0	0	0	0	0	0	0	0	0	0	0	0	0	0	0	0	0	0	0	14	0	0	0	0	0	0	0	0	15	0	0	0	0	0	0	0	0	0	0	0	0	0	0	0	0	0
OTU0041	0	0	0	0	0	0	0	0	0	0	0	0	0	0	0	0	0	0	0	0	0	0	0	0	9	7	0	7	0	0	0	0	0	0	13	0	9	0	0	5	0	0	0	0	0	0	0	0	0
OTU0042	0	0	0	0	0	0	0	0	0	0	0	0	0	0	0	0	0	0	0	0	0	0	0	0	0	0	0	0	0	0	0	0	15	0	0	0	0	0	0	0	0	0	0	0	0	22	0	0	0
OTU0043	0	0	0	0	0	0	0	0	0	0	0	0	0	0	0	0	0	0	0	0	7	0	0	0	0	0	0	0	0	0	0	0	0	0	0	0	0	0	0	0	0	0	0	0	0	0	0	0	0
OTU0044	0	0	0	0	0	0	0	0	0	0	0	0	0	0	0	0	0	0	0	0	12	0	10	0	0	0	19	0	0	0	0	0	10	15	0	0	21	15	0	22	0	0	0	0	0	0	0	0	0
OTU0045	0	0	0	0	0	0	0	0	0	0	0	0	0	36	0	0	0	0	0	0	0	0	41	55	43	0	0	23	0	87	80	22	54	124	58	57	0	88	38	81	0	0	0	0	0	0	0	0	11
OTU0046	0	0	0	0	0	0	0	0	0	0	0	0	0	0	0	0	0	0	0	0	0	5	4	0	0	0	0	0	0	16	0	0	0	0	0	0	0	0	0	0	0	0	0	0	0	0	0	0	0
OTU0047	0	0	0	0	0	0	0	0	0	0	0	0	0	0	0	0	0	0	0	0	0	0	0	0	0	0	0	0	0	0	0	0	0	0	4	0	0	0	0	0	6	0	0	0	0	0	0	0	0
OTU0048	0	0	0	0	0	0	0	0	0	0	0	0	0	0	0	0	0	0	0	0	0	0	0	0	14	24	16	20	21	15	0	8	16	0	19	0	0	17	0	27	0	0	0	0	0	0	0	0	0
OTU0049	0	0	0	0	0	0	0	0	0	0	0	0	0	0	0	0	0	0	0	0	0	0	0	0	0	0	0	0	0	0	0	0	0	0	0	0	0	0	0	0	0	0	89	0	0	144	0	0	0
OTU0050	0	0	0	0	0	0	0	0	0	0	0	0	0	0	0	0	0	0	0	0	0	0	0	0	0	0	0	0	11	0	0	0	39	0	0	0	0	0	0	0	0	0	0	0	0	0	0	0	0
OTU0051	0	0	0	0	25	13	0	0	0	0	73	0	0	0	0	0	0	0	0	13	0	0	0	0	0	22	41	0	0	25	33	0	0	13	0	16	45	0	0	0	0	0	0	0	0	0	0	0	0
OTU0052	0	0	0	0	0	0	0	0	0	0	0	0	0	0	0	0	0	0	0	0	5	8	0	3	3	0	0	0	0	0	0	0	12	0	0	7	0	15	0	0	0	0	0	0	0	0	0	0	0
OTU0053	0	0	0	0	0	0	0	0	0	0	0	0	0	0	0	0	0	0	0	0	0	25	18	0	0	0	0	0	15	0	0	0	0	0	0	27	25	0	38	0	0	0	0	0	0	0	0	0	0
OTU0054	0	0	0	0	0	0	0	0	0	0	0	0	0	0	0	0	0	0	0	0	0	0	4	0	15	0	0	0	8	0	0	0	0	0	0	8	0	9	0	0	0	0	0	0	0	0	0	0	0
OTU0055	0	0	0	0	0	5	0	0	0	0	0	0	0	0	0	0	0	0	0	0	0	0	0	0	0	0	0	6	5	0	0	0	0	0	0	0	0	0	10	0	48	0	26	20	0	119	0	0	0
OTU0056	0	0	0	0	0	0	0	0	0	0	16	0	0	116	0	0	0	0	29	82	116	180	127	52	72	70	49	109	87	168	46	27	89	96	83	79	48	63	72	121	11	0	0	0	20	0	0	0	0
OTU0057	0	0	0	0	0	0	0	0	0	0	0	0	0	0	0	0	0	0	0	0	0	0	17	0	0	0	0	0	0	33	0	0	0	10	0	0	0	0	0	0	0	0	0	0	0	0	0	0	0
OTU0058	0	15	0	0	0	0	0	0	10	0	9	0	0	0	36	0	91	0	0	0	0	59	37	70	0	65	106	65	56	87	37	27	22	0	0	0	0	72	55	64	75	0	42	0	0	0	0	0	24
OTU0059	0	0	0	0	0	0	0	0	0	0	0	0	0	0	0	0	0	0	0	0	13	13	0	0	0	0	0	0	17	0	0	0	22	0	0	0	13	22	0	0	0	0	0	0	0	0	0	0	0
OTU0060	0	0	0	0	0	70	0	0	0	14	0	0	0	0	0	0	0	0	0	0	0	0	0	0	0	0	0	0	0	0	0	0	0	0	0	0	0	0	0	0	0	0	0	0	0	0	0	0	0
OTU0061	0	0	0	0	0	0	0	0	0	0	0	0	0	0	0	0	0	0	33	0	0	0	0	0	0	0	0	0	0	0	0	0	0	0	0	0	0	0	0	0	0	0	0	0	0	0	0	0	42
OTU0062	0	0	0	0	0	0	0	0	0	0	98	0	47	105	0	0	0	0	0	335	153	171	217	151	126	147	194	150	297	172	246	161	194	173	160	138	116	234	245	162	0	49	435	64	0	396	0	23	77
OTU0063	0	0	0	0	0	0	0	0	0	0	0	0	0	0	0	0	0	32	32	0	27	0	17	15	0	38	0	0	0	32	0	0	0	0	0	0	0	23	0	0	0	0	0	0	0	0	0	0	0
OTU0064	0	0	0	0	0	0	0	0	0	0	0	0	0	0	0	0	0	0	0	0	0	51	28	0	0	0	24	20	23	35	0	0	0	35	34	30	0	31	0	47	0	0	0	0	0	0	0	0	0
OTU0065	24	0	0	33	31	73	0	46	0	58	0	44	97	0	111	37	0	0	45	49	48	60	150	61	47	95	83	84	106	76	48	82	76	56	46	87	99	57	82	131	0	0	0	0	18	0	10	24	62
OTU0066	0	0	0	0	0	0	0	0	0	0	0	0	0	0	0	0	0	0	0	0	0	0	0	0	0	0	0	0	0	0	0	0	0	0	0	0	0	0	0	0	0	0	0	0	0	0	0	0	0
OTU0067	0	0	0	0	14	36	0	0	26	81	0	0	0	0	0	0	0	0	0	0	0	0	0	0	0	0	0	0	0	0	0	0	0	0	0	0	0	0	0	0	0	0	0	0	28	0	16	0	0
OTU0068	0	0	0	0	0	0	0	0	0	0	0	0	0	0	0	0	0	0	0	0	0	0	0	0	0	0	0	0	0	0	0	0	0	0	0	0	0	0	0	0	0	0	0	0	0	0	0	0	0
OTU0069	0	0	0	0	0	0	0	0	0	0	0	0	0	0	0	0	0	0	0	0	0	0	0	0	0	0	9	0	0	0	0	0	0	0	0	0	0	0	0	0	0	0	33	0	0	116	0	0	0
OTU0070	0	0	0	0	0	0	0	0	0	0	0	0	0	0	0	0	0	0	0	0	0	0	0	0	0	0	0	0	0	0	0	0	25	7	16	0	15	16	0	0	0	0	0	0	0	0	0	0	0
OTU0071	0	0	0	0	0	0	0	0	0	0	0	0	0	66	0	0	0	0	21	0	52	0	0	30	0	0	0	0	63	64	66	0	0	0	57	0	0	0	22	0	0	0	0	0	0	0	0	0	0
OTU0072	0	0	0	6	0	0	0	0	0	0	0	0	0	0	0	0	0	0	0	0	0	0	0	0	0	0	0	0	0	0	0	0	0	0	0	0	0	0	0	0	0	0	0	0	0	0	0	0	0
OTU0073	0	0	0	0	0	0	0	0	0	0	0	0	0	0	0	0	0	0	0	0	0	0	0	0	0	0	0	0	0	0	0	0	0	0	0	0	18	27	0	17	0	0	20	0	0	0	0	0	0
OTU0074	0	0	0	0	0	0	0	0	0	0	0	0	0	0	0	0	0	0	0	0	0	18	0	0	0	0	0	0	0	0	0	0	0	0	0	0	0	0	19	0	0	0	0	0	0	0	0	0	0
OTU0075	52	0	18	0	43	0	0	0	0	0	14	0	0	0	0	0	0	4	0	0	0	0	18	0	0	0	0	0	0	0	0	0	0	0	0	0	0	54	0	0	0	0	0	0	0	0	0	0	0
OTU0076	0	0	0	0	0	0	0	0	0	0	0	0	0	0	0	0	0	0	0	0	0	0	0	0	0	0	0	13	0	0	0	0	0	0	0	0	0	0	0	0	0	0	25	0	0	48	0	0	0
OTU0077	0	0	0	0	0	0	0	0	0	0	61	0	0	0	0	0	0	29	0	0	0	0	0	1	0	0	0	0	24	24	0	0	19	0	0	0	0	16	0	0	0	0	0	0	0	38	0	0	0
OTU0078	0	0	0	0	0	0	0	0	0	0	0	0	0	0	0	0	0	0	0	0	0	0	0	14	0	16	0	0	0	33	0	0	19	0	0	0	0	19	0	20	0	0	0	0	0	0	0	0	0
OTU0079	0	0	0	0	0	0	0	0	0	0	0	0	0	0	0	0	0	0	0	0	0	0	0	0	0	0	5	0	23	0	0	0	0	0	0	0	0	0	0	0	0	0	0	0	0	0	0	0	0
OTU0080	0	0	0	0	0	0	0	0	0	0	0	0	0	0	0	0	0	0	0	0	39	57	65	48	63	61	43	0	92	52	47	52	47	21	61	78	56	79	52	114	0	0	0	0	0	0	0	0	0
OTU0081	0	0	0	0	0	0	0	0	0	0	0	0	0	0	0	0	0	0	0	0	13	24	8	21	15	16	17	29	20	16	15	20	15	22	26	20	28	15	25	34	0	0	0	0	0	0	0	0	0
OTU0082	0	0	0	0	0	0	0	0	0	0	0	0	0	0	0	0	0	0	0	50	0	0	0	0	0	0	0	0	0	0	0	0	0	0	0	0	0	0	0	0	0	0	0	0	0	0	0	0	0
OTU0083	0	0	0	0	0	0	0	0	0	0	0	0	0	0	0	0	0	0	0	0	0	0	0	0	0	0	0	36	0	26	0	0	35	0	25	0	27	0	0	0	0	0	0	0	0	0	0	0	0
OTU0084	0	0	0	0	0	0	0	0	0	0	0	0	0	0	0	0	0	0	0	0	23	26	0	0	0	17	0	0	0	0	0	0	0	0	0	0	0	0	0	0	0	0	0	0	0	0	0	0	0
OTU0085	0	0	0	0	0	0	0	0	0	0	0	0	0	0	5	0	0	0	0	0	8	0	0	0	0	0	0	0	0	0	0	0	0	0	0	0	0	0	0	0	0	9	0	0	0	0	0	0	0
OTU0086	0	8	0	0	0	0	0	0	18	0	0	0	16	0	0	12	0	0	0	0	0	0	0	0	0	0	0	0	0	0	0	0	0	0	0	0	0	0	0	0	0	0	0	0	0	0	14	8	0
OTU0087	0	0	0	0	0	0	0	0	0	0	0	0	0	0	0	0	0	0	0	0	0	0	0	19	0	0	0	0	27	0	0	0	0	0	0	0	27	32	7	24	0	0	0	0	0	0	0	0	0
OTU0088	0	19	168	0	0	0	0	0	0	0	28	0	0	0	0	0	0	0	0	78	82	88	108	67	105	93	55	72	114	103	83	227	137	94	122	149	60	70	105	101	26	0	0	0	0	142	0	0	0
OTU0089	0	0	0	0	0	0	0	0	0	0	0	0	0	0	0	0	0	0	0	0	0	0	0	0	0	0	0	0	0	0	20	0	0	0	0	0	0	0	0	0	65	0	17	0	67	121	0	0	0
OTU0090	0	0	0	0	0	0	0	0	0	0	0	0	0	0	0	0	0	0	0	0	0	0	0	0	22	0	0	0	0	0	0	0	0	0	14	0	0	31	25	0	0	0	0	0	0	0	0	0	0
OTU0091	23	0	0	0	0	0	0	0	0	0	0	0	0	0	0	0	0	0	0	0	0	0	0	0	0	0	0	0	0	0	0	0	0	0	0	0	0	0	0	0	0	0	0	0	0	0	0	0	0
OTU0092	0	0	0	0	0	0	0	0	5	0	0	0	0	0	0	0	0	0	0	0	0	0	0	0	0	0	0	0	0	0	0	0	0	0	0	0	0	0	0	0	0	0	0	0	0	0	0	0	0
OTU0093	0	0	0	0	0	0	0	0	0	0	0	0	0	0	0	0	0	0	0	0	0	18	0	0	0	0	0	0	0	0	0	0	0	18	0	0	0	0	0	16	0	0	0	0	0	0	0	0	0
OTU0094	0	0	0	0	0	0	0	0	0	0	0	0	0	0	6	0	0	0	0	5	0	0	0	0	0	0	0	0	0	0	0	0	0	0	0	0	0	0	0	0	0	0	0	0	0	0	0	0	0
OTU0095	0	0	0	0	0	0	0	0	0	0	0	0	0	0	0	0	0	0	0	0	0	15	0	0	0	0	0	0	0	0	0	0	0	0	0	0	0	0	10	0	0	0	0	0	0	0	0	0	0
OTU0096	0	0	0	0	0	0	0	0	0	0	0	0	0	0	0	0	0	0	0	0	0	0	0	0	0	0	0	0	0	0	0	0	0	0	0	0	0	0	0	0	0	0	0	0	0	40	0	0	0
OTU0097	0	0	0	0	0	0	0	0	0	0	0	0	0	0	0	0	0	0	0	0	0	0	0	0	0	0	0	0	0	0	0	0	0	0	0	6	0	0	0	0	0	0	0	0	0	25	0	0	0
OTU0098	0	0	0	0	0	13	0	0	0	0	0	0	0	126	0	0	0	0	2	0	0	41	33	0	0	21	0	0	0	0	47	0	0	0	35	47	0	0	0	0	0	0	0	0	0	0	0	0	0
OTU0099	0	0	0	0	43	0	0	0	0	0	0	0	0	0	0	0	0	38	0	0	0	0	0	0	0	0	0	0	0	0	0	0	0	0	0	0	0	0	0	0	0	0	0	0	13	0	0	0	0
OTU0100	0	0	0	0	0	0	0	0	0	0	0	0	0	0	0	0	0	0	0	0	0	0	0	0	0	0	0	0	0	0	44	0	0	0	0	0	0	0	0	0	0	0	38	0	0	137	0	0	0
OTU0101	0	0	0	0	0	0	0	0	0	0	0	0	0	54	0	0	0	0	0	0	16	0	0	0	0	0	0	16	13	12	0	133	37	0	15	0	22	18	43	0	0	0	0	16	0	0	0	0	0
OTU0102	0	0	0	0	0	0	0	0	0	0	0	0	0	0	0	0	0	0	0	0	0	0	0	0	0	0	0	0	0	0	0	0	0	0	0	0	0	0	0	0	0	0	0	0	0	0	0	0	0
OTU0103	0	0	0	0	0	0	0	0	0	0	0	0	0	0	0	0	0	0	0	0	7	20	9	0	0	0	11	8	16	10	0	0	0	0	0	0	0	0	0	0	0	0	0	0	0	0	0	0	0
OTU0104	0	0	0	0	0	0	0	0	0	0	0	0	0	0	0	0	0	0	0	0	0	0	0	13	0	0	0	0	0	0	0	0	0	9	12	0	17	0	0	10	0	0	0	0	0	0	0	0	0
OTU0105	0	0	0	0	0	0	0	37	0	0	0	0	0	0	0	0	0	0	0	0	0	0	0	0	0	0	0	0	0	0	0	0	0	0	0	0	20	0	0	0	0	0	0	0	0	0	0	0	0
OTU0106	0	0	0	0	0	0	0	0	0	0	0	0	0	0	0	0	0	0	0	0	0	0	0	0	0	0	14	21	0	0	0	0	0	0	0	0	0	0	0	0	0	0	0	0	0	0	0	0	0
OTU0107	0	0	0	0	0	0	0	0	10	0	0	0	0	0	0	0	0	0	0	0	0	0	0	0	0	0	0	0	0	0	0	0	0	0	0	0	0	0	0	0	0	0	0	0	0	0	0	0	0
OTU0108	0	0	0	0	0	0	0	0	0	0	0	0	0	0	0	0	0	0	0	0	0	0	0	0	0	0	0	0	0	0	0	0	0	0	0	0	0	0	0	16	39	0	0	0	0	0	0	0	0
OTU0109	0	0	0	0	0	0	0	0	0	0	0	0	0	0	0	0	0	0	0	0	0	0	0	0	0	0	0	0	0	26	0	0	0	21	0	0	16	0	27	27	0	0	10	0	0	0	0	0	0
OTU0110	0	0	0	0	0	0	0	0	0	0	0	0	0	0	0	0	0	0	0	0	0	0	0	0	0	0	0	0	0	0	0	0	0	0	0	9	0	0	0	0	0	0	0	0	0	0	0	0	0
OTU0111	0	0	0	0	0	0	0	0	0	0	0	0	0	0	0	0	0	0	0	0	0	0	0	0	0	0	0	0	0	0	0	3	0	0	0	0	0	0	0	0	0	0	0	0	0	0	0	0	0
OTU0112	0	0	0	0	0	0	0	0	0	0	0	0	0	0	0	0	0	0	0	0	0	0	0	0	0	0	0	0	0	0	0	0	6	0	0	0	0	0	0	11	0	0	0	0	0	0	0	0	0
OTU0113	0	0	0	0	0	0	0	0	0	10	15	0	0	32	0	0	0	0	12	0	32	56	0	18	0	0	0	0	0	0	59	0	50	53	0	21	48	80	0	22	0	0	19	29	0	39	0	0	0
OTU0114	0	0	0	0	0	0	0	0	0	0	0	0	0	0	0	0	0	0	0	0	0	0	0	0	0	0	0	0	0	0	0	0	13	0	0	0	0	43	0	0	0	0	0	0	0	0	0	0	0
OTU0115	0	0	0	0	0	0	0	0	0	0	0	0	0	0	0	0	0	0	0	0	0	0	0	0	0	0	0	0	0	0	0	0	0	0	0	0	0	0	0	0	0	0	0	0	0	0	0	0	0
OTU0116	0	0	0	0	0	0	0	0	0	0	0	0	0	0	0	0	0	0	0	0	0	0	0	0	0	0	0	0	0	0	0	0	0	0	0	0	0	0	0	0	0	0	0	0	0	0	0	0	0
OTU0117	0	0	0	0	0	0	0	0	0	0	0	0	0	0	0	0	0	0	0	0	0	0	0	0	0	0	0	16	0	14	0	0	0	0	0	0	0	0	0	0	0	0	0	0	0	0	0	0	0
OTU0118	0	0	0	0	0	0	0	0	0	0	0	0	0	0	0	0	0	0	0	0	106	105	108	97	115	75	62	128	87	105	43	0	88	94	74	74	72	39	112	31	0	0	0	0	0	0	0	0	0
OTU0119	0	0	0	0	0	0	0	0	0	0	0	0	0	0	0	0	0	0	0	0	0	0	0	0	0	0	0	0	0	0	0	0	0	0	0	0	0	0	16	0	11	0	0	0	0	135	0	0	0
OTU0120	0	0	0	0	0	0	0	0	0	0	0	0	0	0	0	0	0	0	0	0	0	0	0	0	0	0	0	0	0	0	4	0	0	0	0	0	0	0	6	0	0	0	0	0	0	0	0	0	0
OTU0121	0	20	0	0	0	0	0	0	0	0	0	0	0	0	0	0	0	85	32	43	23	21	0	10	0	23	24	12	0	0	11	19	0	0	13	0	15	0	19	23	12	0	0	0	5	0	0	0	0
OTU0122	0	0	0	0	0	0	0	0	0	0	0	0	0	0	0	0	0	0	0	0	0	0	0	0	0	0	0	0	0	0	0	0	0	0	0	0	0	0	0	0	0	0	0	0	0	0	0	0	0
OTU0123	113	17	0	0	15	0	20	0	0	0	30	0	0	0	35	0	35	0	0	108	0	59	40	27	15	0	94	37	46	104	0	148	37	51	13	0	43	20	0	35	0	0	113	0	0	72	0	0	0
OTU0124	0	0	0	10	0	0	0	0	0	0	0	0	0	0	0	0	0	0	0	0	0	0	0	3	0	0	0	0	0	0	0	0	0	0	0	0	0	0	0	0	0	0	0	0	0	0	0	0	0
OTU0125	0	0	0	0	0	0	0	0	0	0	0	0	0	0	0	0	0	0	0	0	16	28	13	0	34	22	22	13	36	0	0	0	0	0	0	23	27	15	28	29	0	0	0	0	0	0	0	0	0
OTU0126	0	0	0	0	0	0	0	0	0	0	0	0	0	0	0	0	0	0	0	3	0	0	0	0	0	0	6	0	0	0	0	0	0	0	0	0	0	0	0	0	0	0	0	0	0	0	0	0	0
OTU0127	0	0	0	0	0	0	0	0	0	0	0	0	0	0	0	0	0	0	0	0	20	0	0	0	0	0	0	0	0	0	0	0	0	0	0	0	29	17	43	30	0	0	0	0	0	0	0	0	0
OTU0128	310	0	0	0	0	0	0	5	0	0	222	0	0	0	169	0	28	23	0	0	73	53	66	42	0	35	93	42	78	25	101	632	101	67	74	37	72	51	87	183	0	0	359	0	58	0	0	69	0
OTU0129	0	0	0	0	0	0	0	0	0	0	0	0	0	0	0	0	0	0	0	0	0	0	0	0	0	7	0	0	0	0	0	0	23	0	0	0	0	0	0	0	0	0	0	0	0	0	0	0	0
OTU0130	0	0	0	0	0	0	0	0	0	0	0	0	0	0	0	0	0	0	0	0	28	16	15	31	23	0	17	31	34	35	32	26	14	28	24	20	32	34	35	33	0	0	0	0	0	0	0	0	0
OTU0131	0	0	0	0	0	0	0	0	0	0	0	0	0	0	0	0	0	0	0	0	9	13	0	7	5	0	0	0	5	7	0	10	9	0	0	0	13	0	0	16	0	0	0	0	0	0	0	0	0
OTU0132	0	0	0	0	0	0	0	0	0	0	17	0	0	0	0	0	0	0	0	0	16	14	0	0	16	15	16	15	0	23	0	24	11	0	0	0	10	25	18	25	0	0	0	0	0	0	0	0	0
OTU0133	0	0	0	0	0	0	0	0	0	0	38	0	0	0	0	0	0	0	0	7	0	13	9	0	0	0	0	0	0	0	0	0	0	0	10	12	0	0	0	8	0	15	0	30	0	0	0	0	0
OTU0134	0	0	0	0	0	0	0	0	0	0	0	0	0	0	0	0	0	0	0	0	0	0	0	0	0	0	0	0	0	0	0	0	0	0	0	0	0	0	0	0	0	0	59	0	13	77	0	0	0
OTU0135	26	22	0	30	35	57	31	29	23	0	23	0	26	23	126	36	0	95	0	41	49	76	47	36	25	65	77	52	84	44	0	58	38	42	0	41	54	63	45	50	0	0	29	0	41	0	0	24	0
OTU0136	0	0	0	0	0	0	0	0	0	0	0	0	0	0	0	0	0	0	0	15	0	0	0	4	0	0	0	0	0	0	0	0	0	0	0	0	0	0	0	0	0	0	0	0	0	0	0	0	0
OTU0137	0	0	0	0	0	0	0	0	0	0	0	0	0	0	0	0	0	0	0	0	0	0	0	0	0	0	0	20	0	0	0	0	14	14	22	0	0	0	0	16	0	0	0	7	0	0	0	0	0
OTU0138	0	0	0	0	0	0	0	0	0	0	0	0	0	0	0	0	0	0	0	0	0	0	0	0	0	0	0	0	12	0	0	0	22	0	0	9	13	9	0	0	0	0	0	0	0	0	0	0	0
OTU0139	0	0	0	33	0	0	0	0	0	0	0	0	0	0	0	0	0	0	0	0	0	10	0	0	0	0	0	0	0	0	38	0	0	0	0	0	8	0	0	0	0	0	0	0	0	124	20	13	83
OTU0140	0	0	0	0	0	0	0	0	0	0	0	0	0	0	0	0	0	0	0	0	14	0	0	0	0	0	10	0	0	0	0	0	0	0	0	0	19	0	0	0	0	0	0	0	0	0	0	0	0
OTU0141	0	0	0	0	0	0	0	0	0	0	0	0	0	0	0	0	0	0	0	0	0	8	0	0	0	12	0	0	0	0	0	0	0	0	0	0	0	0	0	0	0	0	0	0	0	0	0	0	0
OTU0142	0	0	0	0	0	0	0	0	0	0	0	0	0	0	0	0	0	0	0	0	22	0	26	33	33	74	34	69	47	40	0	0	36	35	31	45	68	56	57	0	0	0	6	0	0	0	0	0	0
OTU0143	0	0	0	0	0	0	0	0	0	0	0	0	0	0	0	0	0	0	0	0	0	0	0	0	0	0	0	0	5	0	0	0	0	0	0	0	0	0	0	12	0	0	0	0	0	0	0	0	0
OTU0144	0	0	0	0	0	0	0	0	0	0	0	0	0	0	0	0	0	0	0	0	0	0	0	0	0	0	0	12	0	0	0	12	0	0	0	17	0	19	0	16	0	0	0	0	0	0	11	0	0
OTU0145	0	0	0	0	7	0	0	0	0	0	0	0	0	0	0	0	0	0	0	0	27	0	14	0	29	20	0	28	26	12	22	0	25	25	35	40	20	15	31	55	0	14	0	0	0	0	0	0	0
OTU0146	0	0	0	0	0	0	0	0	0	0	0	0	0	0	0	0	0	0	0	0	17	0	28	26	0	0	0	0	0	28	0	0	0	0	0	0	23	0	0	0	0	0	0	0	0	0	0	0	0
OTU0147	0	0	0	0	0	0	0	0	0	0	0	0	0	0	0	0	0	0	0	0	0	13	0	0	0	16	0	0	24	0	0	17	0	0	0	17	0	0	0	23	0	0	0	0	0	0	0	0	0
OTU0148	0	0	0	0	15	0	0	0	0	0	0	0	0	0	0	0	0	0	0	0	0	0	19	0	0	18	0	14	0	17	0	0	0	0	0	24	0	0	0	0	0	0	0	0	0	0	0	0	0
OTU0149	0	0	0	0	0	0	0	0	0	0	0	0	0	0	0	0	0	0	0	0	0	0	0	0	0	0	0	6	0	0	0	0	0	0	0	0	0	0	0	10	0	0	0	0	0	0	0	0	0
OTU0150	0	0	0	0	0	0	0	0	0	0	0	0	0	0	0	0	0	0	0	0	0	28	28	0	31	0	36	29	32	37	0	24	25	0	27	31	37	28	23	0	0	0	0	0	0	0	0	0	0
OTU0151	0	0	0	0	0	0	0	0	0	0	0	0	0	0	0	0	0	0	0	0	10	16	0	13	22	21	0	21	21	0	0	0	18	0	17	18	19	0	28	14	0	0	0	0	0	0	0	0	0
OTU0152	0	0	0	0	0	0	0	0	0	0	0	0	0	0	0	0	0	0	0	0	0	0	0	0	0	0	0	0	39	0	0	0	41	0	0	0	0	0	0	0	0	0	0	0	0	0	0	0	63
OTU0153	0	0	0	0	0	0	0	0	12	0	0	0	0	0	0	0	0	0	0	0	18	15	18	8	17	18	0	8	27	26	17	0	13	33	23	13	49	28	13	25	0	0	0	0	0	0	0	0	0
OTU0154	0	0	0	0	0	8	0	0	0	0	0	53	0	0	0	0	0	0	0	0	47	27	0	29	0	0	19	0	22	37	33	0	23	41	17	30	20	30	52	19	11	0	0	0	0	0	0	0	0
OTU0155	0	0	0	16	0	0	0	0	0	0	0	0	0	0	0	0	0	0	0	0	43	72	0	43	19	0	23	0	0	39	48	0	41	37	0	0	0	0	10	0	0	0	0	0	0	0	0	0	0
OTU0156	0	0	0	0	0	0	0	0	0	0	0	0	0	0	0	0	0	0	0	0	0	0	0	26	0	23	0	36	0	0	0	0	0	0	17	0	26	0	58	50	0	0	0	0	0	0	0	0	0
OTU0157	0	0	0	0	0	0	0	0	0	0	0	0	0	0	0	0	0	0	0	0	0	0	0	0	0	0	0	0	0	0	0	0	0	0	0	25	0	0	0	4	0	0	0	0	0	0	0	0	0
OTU0158	0	0	0	0	34	0	0	0	0	0	0	0	0	0	0	0	0	0	0	0	45	53	39	51	45	49	51	54	61	46	33	29	55	0	29	31	0	31	41	55	0	0	0	0	0	0	0	0	0
OTU0159	0	0	0	0	0	0	0	0	0	0	0	0	14	0	0	0	0	0	0	0	0	0	0	0	0	0	0	0	0	0	0	0	0	0	0	0	0	0	0	0	0	0	0	0	0	43	0	0	0
OTU0160	6	0	0	0	0	0	0	0	0	0	0	0	0	0	0	0	0	0	0	0	0	0	0	0	0	0	0	0	0	0	7	0	0	0	0	0	0	0	0	0	0	0	0	0	0	0	0	0	0
OTU0161	0	0	0	0	0	0	0	0	0	0	0	0	0	0	0	0	0	0	0	0	0	0	0	0	0	0	0	0	0	0	0	0	0	0	0	0	0	0	0	0	10	0	0	0	0	0	0	0	0
OTU0162	0	0	0	0	0	0	0	0	0	0	0	0	0	0	0	0	0	0	0	0	34	24	26	37	59	37	56	35	39	61	37	0	53	65	32	49	61	47	63	71	0	7	11	0	0	0	0	0	0
OTU0163	0	0	0	0	0	0	0	0	0	0	0	0	0	0	0	0	0	0	0	0	0	0	0	0	0	0	0	0	0	0	0	0	0	0	0	0	0	0	0	0	0	0	0	0	0	40	0	0	0
OTU0164	0	0	0	0	0	0	0	0	0	0	0	0	0	0	0	0	0	0	0	0	0	4	0	0	4	0	0	0	0	0	0	0	0	0	4	0	0	0	0	12	0	0	0	0	0	0	0	0	0
OTU0165	0	0	0	0	0	0	0	0	0	0	0	0	0	0	0	0	0	0	0	0	0	0	0	0	9	0	0	0	0	0	0	0	0	4	0	0	0	0	0	0	0	0	0	0	0	0	0	0	0
OTU0166	0	0	0	0	0	0	0	0	0	0	0	0	0	0	0	0	0	0	0	0	0	0	0	0	0	0	0	0	0	0	0	0	0	0	0	0	0	0	0	0	0	0	0	0	0	45	0	0	0
OTU0167	0	0	0	0	0	0	0	0	0	60	0	0	0	0	0	0	0	0	0	0	0	16	0	0	0	0	0	0	0	0	0	0	0	0	0	0	17	0	0	0	0	0	0	0	0	0	0	0	0
OTU0168	0	0	0	0	0	0	0	0	0	0	0	0	0	0	0	0	0	0	0	9	0	0	0	24	0	0	0	0	0	0	0	0	0	0	0	0	0	0	0	0	0	0	0	0	0	0	0	0	0
OTU0169	0	0	0	0	0	0	0	0	0	0	0	0	0	0	0	0	0	0	0	0	77	0	0	12	0	0	36	0	0	0	0	0	0	0	0	0	0	0	0	91	0	0	0	0	0	0	0	0	0
OTU0170	0	0	0	0	0	0	0	0	0	0	0	0	0	0	0	0	0	0	0	0	0	0	0	0	0	0	0	0	0	0	0	0	0	0	0	0	0	0	0	0	11	0	36	0	0	36	0	0	0
OTU0171	0	5	0	0	27	0	0	0	0	0	0	0	0	48	0	0	0	0	33	19	116	59	81	99	70	95	91	95	48	84	113	56	111	108	137	109	149	91	109	137	0	0	0	0	0	0	0	0	0
OTU0172	0	0	0	0	0	15	0	0	0	0	0	0	0	0	0	0	0	0	0	0	0	0	0	23	0	0	0	0	0	0	0	0	0	0	0	0	0	0	0	0	0	0	0	0	0	0	0	0	0
OTU0173	0	0	0	0	0	0	0	0	0	0	0	0	0	0	0	0	0	0	0	0	0	0	0	0	0	0	0	0	0	0	0	0	0	14	0	0	21	0	0	20	0	0	0	0	0	0	0	0	0
OTU0174	0	0	0	0	0	0	0	0	0	0	0	0	0	0	0	0	0	0	0	0	0	0	0	0	0	8	0	0	0	0	0	0	0	0	5	0	6	0	0	0	0	0	0	0	0	0	0	0	0
OTU0175	0	0	0	0	0	0	0	0	0	0	0	0	0	0	0	0	0	0	0	0	0	0	3	0	0	0	0	0	0	0	0	0	0	0	0	0	9	0	0	0	0	0	0	0	0	0	0	0	0
OTU0176	0	0	0	0	0	0	0	0	0	0	0	0	0	0	0	0	0	0	0	0	10	10	14	11	20	18	28	7	18	20	0	0	17	8	9	10	9	0	8	8	0	0	0	0	0	0	0	0	0
OTU0177	57	64	0	18	0	102	0	0	52	36	173	129	0	49	50	56	0	0	24	45	0	46	28	26	0	30	31	0	0	0	33	56	0	44	32	31	60	86	24	55	0	41	49	0	15	90	0	4	64
OTU0178	10	0	0	0	0	0	0	0	0	0	76	0	0	88	91	0	0	0	54	0	107	242	193	86	118	122	262	190	284	302	82	117	69	179	124	154	214	143	291	189	0	23	194	0	28	37	0	0	74
OTU0179	0	0	0	0	0	0	0	0	0	0	0	0	0	0	0	0	0	0	0	0	0	0	0	0	0	0	0	0	0	0	0	0	0	0	0	0	0	0	0	0	0	0	0	10	0	0	0	0	0
OTU0180	0	0	0	0	0	0	0	0	0	0	0	0	0	0	0	0	0	0	0	0	0	0	0	0	0	0	0	0	0	0	0	0	4	0	0	0	22	0	0	0	0	0	0	0	0	0	0	0	0
OTU0181	0	0	0	0	0	0	0	0	0	0	0	0	0	0	0	0	0	0	0	0	14	18	49	0	0	0	0	0	0	0	0	0	13	55	43	21	0	0	17	0	0	0	0	0	0	0	0	0	0
OTU0182	0	0	0	0	0	0	0	0	0	0	0	0	0	0	0	0	0	13	0	0	17	0	0	0	0	0	0	0	0	0	0	0	0	0	0	0	0	0	0	6	0	0	0	0	0	0	0	0	0
OTU0183	175	76	178	60	114	0	63	0	0	87	249	147	0	363	108	0	40	64	128	123	317	1374	427	298	281	201	360	274	408	964	95	53	236	481	275	276	390	247	425	303	16	107	118	169	43	0	0	0	100
OTU0184	0	0	0	0	11	0	0	0	0	0	0	0	0	0	0	0	0	0	0	0	37	0	0	0	0	0	48	0	0	15	33	0	10	0	0	23	1	0	0	39	0	0	36	0	0	103	0	0	0
OTU0185	0	0	0	0	0	0	0	0	0	0	0	0	0	0	0	0	0	0	0	0	11	0	0	0	0	0	12	0	19	0	0	8	0	11	0	7	10	12	0	12	0	0	0	0	0	0	0	0	0
OTU0186	13	0	0	0	0	0	0	0	0	0	0	0	0	0	0	0	0	0	0	0	0	0	57	31	0	0	0	0	0	34	0	0	0	22	0	0	0	0	23	0	0	0	36	0	0	0	0	0	0
OTU0187	0	0	0	0	0	0	0	0	0	0	0	0	0	0	0	0	0	0	0	0	0	0	0	0	0	0	11	9	0	8	0	0	0	0	0	0	0	7	7	6	0	0	0	0	0	0	0	0	0
OTU0188	0	0	0	0	0	0	0	0	0	0	0	0	0	0	0	0	0	0	0	0	0	0	0	0	0	0	0	5	0	0	0	0	0	0	0	0	7	0	0	0	0	0	0	0	0	0	0	0	0
OTU0189	0	0	0	0	51	0	0	0	0	0	0	0	0	15	0	0	0	0	0	0	0	21	22	26	15	12	0	0	18	75	28	0	19	0	0	20	34	23	48	17	0	0	0	0	0	0	0	0	0
OTU0190	0	0	0	0	0	0	0	0	0	0	0	0	0	0	0	0	0	0	0	0	13	0	0	0	0	0	0	0	0	0	0	0	0	0	0	0	0	0	0	0	0	0	0	0	0	40	0	0	0
OTU0191	0	0	0	0	0	0	0	0	0	0	0	0	0	0	0	0	0	0	0	0	0	16	0	0	0	0	0	0	0	10	0	0	0	29	0	0	0	0	0	0	0	0	0	0	0	0	0	0	0
OTU0192	0	0	0	0	0	0	0	0	0	0	0	0	0	0	0	0	0	0	0	0	0	0	16	0	0	0	0	15	0	0	0	0	0	0	0	0	0	0	0	0	0	0	0	0	0	0	0	0	0
OTU0193	0	0	0	0	0	0	0	0	0	0	0	0	0	0	0	0	34	25	0	0	0	0	0	0	0	0	0	0	0	0	0	0	0	0	0	0	0	0	0	16	0	0	0	0	0	0	0	23	0
OTU0194	0	0	0	0	0	0	0	0	0	0	0	0	0	0	0	0	0	0	0	0	0	0	22	0	0	0	0	0	19	0	0	0	0	0	0	0	0	0	0	0	0	15	63	0	0	0	0	0	0
OTU0195	0	0	0	0	0	0	0	0	0	0	0	0	0	0	0	0	0	0	0	0	0	0	0	0	12	0	0	0	0	0	0	0	14	0	0	0	0	0	21	16	0	0	0	0	0	0	0	0	0
OTU0196	0	0	0	0	0	0	0	0	0	0	0	0	0	0	0	0	0	0	0	0	0	0	0	0	0	0	0	0	0	21	0	0	0	0	0	0	0	0	0	0	0	0	54	0	0	0	0	0	0
OTU0197	0	0	0	0	0	0	0	0	0	0	0	0	0	0	0	0	0	0	0	0	10	12	9	0	0	0	0	9	0	0	0	0	18	12	0	0	0	0	0	10	0	0	0	0	0	0	0	0	0
OTU0198	0	0	0	15	0	0	0	0	0	0	0	20	0	0	33	0	0	0	0	45	0	0	0	0	0	0	0	14	0	0	0	0	0	0	0	0	0	0	0	0	0	0	0	0	15	0	0	0	0
OTU0199	0	0	0	0	0	0	0	0	0	0	0	0	0	0	0	0	0	0	0	0	0	0	0	0	0	0	0	0	7	9	0	0	0	0	11	0	0	0	0	0	0	0	0	0	0	0	0	0	0
OTU0200	0	0	0	0	0	0	0	0	0	0	0	0	0	0	0	0	0	0	0	0	0	30	0	0	0	0	0	0	25	0	0	0	0	0	0	0	0	0	0	0	0	0	62	0	0	141	0	0	0
OTU0201	20	0	0	0	0	0	0	0	0	0	0	0	0	0	0	0	0	0	0	0	0	0	0	0	0	0	0	0	0	0	0	0	0	0	0	0	0	3	0	0	0	0	0	0	0	0	0	0	0
OTU0202	204	0	0	0	0	0	0	0	15	26	170	0	0	0	46	0	0	0	0	147	294	463	427	209	55	214	351	168	288	305	390	276	190	239	138	124	207	232	253	284	0	30	0	42	55	54	0	0	0
OTU0203	0	0	0	0	0	0	0	0	0	0	0	0	0	0	0	0	0	0	0	0	51	55	36	43	52	66	48	36	68	32	0	41	40	68	34	49	42	51	65	79	0	0	0	0	0	0	0	0	0
OTU0204	0	0	0	0	0	0	0	0	0	0	0	0	0	0	0	0	0	0	0	0	0	5	0	0	0	0	0	0	0	20	24	17	4	0	0	0	9	7	0	0	0	0	0	0	26	0	0	0	0
OTU0205	0	0	0	0	0	0	0	0	0	0	0	0	0	0	0	0	0	0	0	0	0	0	0	0	0	0	0	0	0	0	0	0	0	0	0	0	7	0	0	0	0	0	0	0	0	0	0	0	0
OTU0206	0	4	0	0	0	0	0	0	0	5	0	0	0	0	0	0	0	0	0	0	0	0	0	0	0	0	0	0	0	0	0	0	0	0	0	0	0	0	0	0	0	0	0	0	0	0	0	0	3
OTU0207	0	0	0	0	0	0	0	0	0	0	0	0	0	10	0	0	0	0	0	0	0	0	0	0	0	14	11	0	0	0	0	0	0	0	0	0	0	18	0	0	0	0	0	0	0	0	0	0	0
OTU0208	0	0	0	0	0	0	0	0	0	0	0	0	0	0	0	0	0	0	0	0	0	0	0	0	0	0	0	0	18	0	0	0	0	0	0	0	0	17	0	0	0	0	0	0	0	0	0	0	0
OTU0209	0	0	0	0	0	0	0	0	0	0	0	0	0	0	0	0	0	0	0	0	0	0	0	0	0	0	0	0	0	0	0	0	0	16	11	0	0	0	0	0	0	0	0	0	0	0	0	0	0
OTU0210	0	0	0	0	0	0	0	0	12	0	0	0	0	0	0	0	0	0	0	0	0	0	0	0	0	0	0	0	0	0	0	0	0	0	0	0	0	0	0	0	0	0	22	0	0	0	0	0	0
OTU0211	0	0	0	0	0	0	0	0	0	0	0	0	0	0	0	0	0	0	0	90	15	21	28	0	0	22	17	21	0	17	0	20	0	26	27	23	0	0	28	18	0	0	0	0	0	0	0	0	0
OTU0212	0	0	0	61	0	30	34	0	178	0	0	0	61	0	0	36	0	0	65	0	0	0	0	0	0	0	70	0	0	0	0	0	0	22	0	0	0	0	0	24	0	0	9	0	0	87	0	25	0
OTU0213	0	0	0	0	0	0	0	0	0	0	0	0	0	0	0	0	0	0	0	0	0	8	10	0	0	0	14	0	0	0	3	0	0	7	0	11	0	0	0	12	0	0	0	0	0	0	0	0	0
OTU0214	0	0	0	0	0	35	0	0	0	0	0	0	0	0	0	0	0	0	0	0	0	0	0	0	0	9	0	0	0	0	0	0	0	0	0	0	0	0	0	0	0	0	0	0	0	0	0	0	0
OTU0215	17	0	0	0	0	0	0	0	0	0	0	24	0	58	7	0	0	0	39	0	0	18	0	0	0	0	0	0	0	0	20	0	0	8	12	15	10	0	0	0	0	0	12	0	0	0	0	0	0
OTU0216	0	0	0	0	0	0	0	0	0	0	0	0	0	0	0	0	0	0	0	0	0	0	0	0	0	0	0	0	0	0	0	0	0	0	0	0	0	0	0	0	0	0	0	0	0	0	0	0	0
OTU0217	0	0	0	0	0	0	0	0	0	0	0	0	0	0	0	0	0	0	0	0	0	0	0	0	13	0	0	0	0	0	16	0	0	0	0	16	43	28	27	38	0	0	0	23	0	0	0	0	0
OTU0218	0	0	0	0	0	0	0	0	0	0	0	0	0	0	0	0	0	0	0	0	0	0	0	5	0	0	0	13	0	0	0	0	0	0	12	17	0	8	0	0	0	0	0	0	0	0	0	0	0
OTU0219	57	0	0	0	23	0	9	0	0	44	0	0	33	0	34	0	0	0	97	0	41	0	54	38	47	0	84	46	21	74	0	0	65	37	0	29	0	66	40	51	0	0	0	0	0	0	7	16	0
OTU0220	0	0	0	0	0	0	0	0	0	0	0	0	0	0	0	0	10	0	0	0	0	0	0	0	0	0	0	0	0	0	0	0	0	0	0	0	0	0	0	0	28	0	52	0	22	206	14	0	0
OTU0221	0	0	0	0	0	0	0	0	0	0	0	0	0	0	0	0	0	0	0	0	0	0	0	0	0	0	0	0	0	0	33	0	0	0	0	0	0	0	0	0	0	0	19	0	0	91	13	0	0
OTU0222	0	0	0	0	0	0	0	0	0	0	0	0	0	0	0	0	0	0	0	0	0	0	0	0	0	0	28	0	0	0	2	0	0	0	0	4	0	0	0	0	0	0	0	0	0	0	0	0	0
OTU0223	0	0	0	0	0	0	0	0	0	0	0	0	0	0	0	0	0	0	0	0	0	0	0	0	0	0	0	0	5	0	0	0	6	0	0	0	0	0	0	0	0	0	0	0	0	0	0	0	0
OTU0224	0	0	0	0	0	0	0	0	0	0	0	0	0	0	0	0	0	0	0	0	0	0	0	0	0	0	0	0	0	13	0	0	17	0	0	0	0	0	0	0	0	0	0	0	0	0	0	0	0
OTU0225	0	0	0	0	0	0	0	0	0	0	0	0	0	0	0	0	0	0	0	0	107	166	91	143	156	115	74	103	173	157	72	27	106	114	0	124	111	144	128	174	0	0	0	0	0	0	0	0	0
OTU0226	0	0	0	0	0	0	0	0	0	0	0	28	0	0	0	0	0	0	22	0	0	0	0	0	0	0	0	0	0	0	0	0	0	0	0	0	0	0	0	0	0	0	0	0	0	0	0	0	0
OTU0227	0	0	0	0	0	0	0	0	0	0	0	0	0	0	0	0	0	0	0	0	0	0	10	0	7	7	6	4	7	4	0	0	9	3	0	10	0	11	9	44	0	0	0	0	0	0	0	0	0
OTU0228	0	0	0	0	0	0	0	0	0	0	0	0	0	0	0	0	0	0	0	0	0	0	0	0	0	0	0	12	0	0	0	0	6	0	0	0	0	0	0	0	0	0	0	0	0	0	0	0	0
OTU0229	0	16	0	0	0	0	0	0	0	0	0	0	0	0	0	0	0	0	0	0	0	0	0	0	0	0	0	0	0	0	0	0	0	0	0	0	0	0	0	0	0	0	0	0	0	0	0	0	0
OTU0230	0	0	0	0	0	0	0	0	0	0	0	0	0	0	0	0	0	0	0	0	0	18	0	0	0	12	0	0	0	0	0	0	0	0	0	0	0	0	0	0	0	0	0	0	0	0	0	0	0
OTU0231	0	0	0	0	0	0	0	0	0	0	0	0	0	0	0	0	0	0	0	7	0	0	14	0	0	0	0	0	11	0	0	0	0	13	0	0	16	38	0	0	0	0	0	0	0	0	0	0	0
OTU0232	0	0	0	0	0	0	0	0	0	0	0	0	0	0	0	0	0	0	0	0	0	0	0	0	19	0	0	16	26	0	0	0	0	0	0	21	0	0	14	13	0	0	0	0	0	0	0	0	0
OTU0233	0	0	0	0	0	0	0	0	0	0	0	0	0	0	0	0	0	0	0	0	6	11	0	0	0	6	0	0	0	0	0	0	0	0	5	0	0	0	0	4	0	0	0	0	0	0	0	0	0
OTU0234	0	0	0	0	27	0	0	0	0	0	4	19	0	0	41	0	0	30	17	0	0	0	0	0	0	13	0	11	0	0	0	0	6	0	0	0	0	0	0	0	0	0	0	0	0	0	0	0	0
OTU0235	0	0	0	0	0	0	0	0	0	0	0	0	0	0	0	0	0	0	0	0	0	0	0	0	0	0	0	9	0	0	0	0	0	0	0	0	18	14	0	0	0	0	0	0	0	0	0	0	0
OTU0236	0	0	0	0	0	0	0	0	0	0	0	0	0	0	0	0	0	0	0	0	0	0	0	0	0	0	0	0	0	0	0	20	0	0	0	0	0	13	0	0	0	0	0	0	0	0	0	0	0
OTU0237	0	0	0	0	0	0	0	0	0	0	0	0	0	0	0	0	0	0	0	0	0	0	0	0	0	0	0	0	0	0	0	0	0	0	0	0	0	0	0	0	0	0	0	0	0	12	0	0	0
OTU0238	0	0	0	0	0	0	0	0	0	0	0	0	0	0	0	0	0	0	0	0	4	0	4	0	0	0	0	0	0	0	0	0	0	0	0	0	0	0	0	6	0	0	0	0	0	0	0	0	0
OTU0239	0	0	0	0	0	0	0	0	0	0	0	0	0	0	0	0	0	0	0	0	0	0	0	0	17	0	13	0	22	7	0	7	0	0	19	22	0	19	16	22	0	0	0	0	0	0	0	0	0
OTU0240	0	0	0	0	0	0	0	0	0	0	0	0	0	0	0	0	0	0	0	0	0	10	0	0	0	27	0	18	10	0	0	15	10	0	0	8	0	0	0	48	0	0	0	0	0	0	0	0	0
OTU0241	0	0	0	0	37	0	0	0	0	0	0	0	0	13	0	0	0	0	0	9	0	45	81	32	51	61	34	25	44	128	52	37	24	53	30	0	27	14	32	16	0	0	66	0	10	0	0	0	0
OTU0242	0	0	0	0	0	0	0	0	0	0	0	0	0	0	0	0	0	0	0	0	11	19	0	13	15	0	8	11	16	14	0	6	12	8	0	16	0	0	16	15	0	0	0	0	0	0	0	0	0
OTU0243	0	0	0	0	0	0	0	0	0	0	0	0	0	0	0	0	0	0	0	0	0	0	0	0	17	0	22	0	20	0	0	0	0	13	0	0	0	0	0	0	0	0	0	0	0	0	0	0	0
OTU0244	0	0	0	0	0	0	0	0	0	0	0	0	0	0	0	0	0	0	0	0	0	0	0	0	0	0	0	0	10	0	0	0	9	0	0	0	0	0	0	12	0	0	0	0	0	0	0	0	0
OTU0245	0	0	0	0	0	0	0	0	0	0	0	0	0	0	0	0	0	0	0	0	0	0	5	0	0	4	0	0	0	0	0	0	0	0	0	6	0	0	0	0	0	0	0	0	0	0	0	0	0
OTU0246	0	0	0	0	0	0	0	0	0	0	0	0	0	0	0	0	0	0	0	0	40	7	7	8	13	11	0	0	5	0	42	4	0	52	11	39	6	0	52	0	0	0	0	0	0	0	0	0	0
OTU0247	0	0	0	0	0	0	0	0	0	0	0	0	0	0	0	0	0	0	0	0	0	0	2	0	0	0	0	0	0	0	0	0	0	8	5	0	0	9	7	7	0	0	0	0	0	0	0	0	0
OTU0248	0	0	0	0	0	0	0	0	0	0	0	0	0	0	0	0	0	0	0	0	0	0	0	0	0	0	0	0	0	0	0	0	0	0	0	0	0	0	0	0	0	0	0	0	0	6	0	0	0
OTU0249	0	0	0	0	0	0	0	0	0	0	0	0	0	0	0	0	0	0	0	0	0	0	0	0	0	0	10	0	0	0	0	0	0	0	0	0	0	0	0	0	0	0	0	0	0	0	0	0	0
OTU0250	0	0	0	0	0	0	0	0	0	0	0	0	0	0	0	0	0	0	0	0	0	0	3	0	0	0	0	0	0	3	0	0	4	0	0	0	0	0	0	4	0	0	0	0	0	0	0	0	0
OTU0251	0	0	0	0	0	0	0	0	0	0	0	0	0	0	0	0	0	0	0	0	0	9	10	0	14	0	18	0	17	21	0	16	0	0	0	9	7	27	0	4	0	0	0	0	0	0	0	0	0
OTU0252	0	0	0	0	0	0	0	0	0	0	0	0	0	0	0	0	0	0	0	0	0	0	0	0	0	0	0	0	0	23	0	0	0	0	0	0	0	0	0	0	0	0	13	0	0	0	0	0	0
OTU0253	0	0	0	0	0	0	0	0	0	0	0	0	0	11	0	0	0	0	0	0	0	0	0	0	0	0	0	0	0	0	0	0	0	8	16	0	0	0	0	19	0	0	0	0	0	0	0	0	0
OTU0254	0	0	0	0	0	0	0	0	0	0	0	0	0	0	0	0	0	0	0	0	0	0	0	0	0	0	0	0	0	0	0	0	0	0	0	14	12	0	0	0	0	0	0	0	0	0	0	0	0
OTU0255	0	0	0	0	0	0	0	0	0	0	0	0	8	0	0	0	0	0	0	0	10	0	0	0	0	0	0	0	12	18	0	0	34	0	0	0	0	0	0	0	0	0	0	0	0	0	0	0	0
OTU0256	0	0	0	0	0	9	0	0	0	0	0	0	0	0	0	0	0	0	0	0	0	0	0	6	0	0	0	0	0	0	0	0	0	0	0	0	0	0	0	0	0	0	0	0	0	0	0	0	0
OTU0257	0	0	0	0	0	0	0	22	0	0	0	0	0	0	0	0	0	0	0	0	9	15	0	0	7	0	0	0	14	14	0	0	11	20	17	12	18	12	0	0	0	23	6	6	0	0	0	0	0
OTU0258	0	0	0	0	0	0	0	0	0	0	0	0	0	0	0	0	0	0	0	0	13	0	0	0	0	0	8	0	14	0	0	0	0	16	0	20	0	0	0	20	0	0	0	0	0	0	0	0	0
OTU0259	0	0	0	0	0	0	0	0	30	0	0	0	0	0	0	0	0	0	0	0	0	0	0	0	0	0	0	0	0	0	0	0	0	0	0	0	0	0	0	0	0	0	0	0	8	0	0	0	0
OTU0260	0	0	0	0	0	0	0	0	0	0	0	0	0	0	0	0	0	0	0	0	0	0	0	0	0	0	0	0	0	0	0	0	0	0	0	0	0	0	0	0	0	0	0	0	12	0	0	0	0
OTU0261	0	0	0	0	0	0	0	0	0	0	0	0	0	0	0	0	0	0	0	0	0	0	0	0	0	5	9	6	0	0	0	0	0	5	0	0	0	0	0	6	0	0	0	0	0	0	0	0	0
OTU0262	56	51	55	0	157	0	0	0	0	0	78	0	0	66	10	0	0	16	25	68	30	41	45	24	80	35	35	62	52	125	68	151	92	47	29	63	36	41	101	72	39	0	31	18	9	0	0	16	0
OTU0263	0	0	0	0	0	0	0	0	0	0	0	0	0	0	0	0	0	0	0	0	17	23	25	28	20	23	0	6	27	20	0	16	22	19	20	23	30	21	38	46	0	0	0	0	0	0	0	0	0
OTU0264	0	0	0	0	0	0	0	0	0	0	0	0	0	0	0	0	0	0	0	0	12	16	15	0	18	13	0	15	23	102	48	8	72	0	0	18	15	25	0	23	0	0	0	0	0	0	0	0	0
OTU0265	0	0	0	0	0	0	0	0	0	12	0	0	0	0	0	0	0	0	0	0	20	0	0	0	0	0	0	0	0	13	0	0	0	0	5	0	0	0	6	0	0	0	0	0	0	0	0	0	0
OTU0266	0	0	0	0	0	0	0	0	0	0	0	0	3	0	0	0	0	0	0	0	55	0	0	0	0	0	0	0	0	0	0	0	0	0	0	0	0	0	0	0	0	0	0	0	0	0	0	0	0
OTU0267	0	0	0	0	0	0	0	0	0	0	0	0	0	0	0	0	0	0	0	0	60	58	21	32	0	36	68	41	38	43	31	43	14	19	34	35	37	47	58	70	0	0	0	0	0	0	0	0	0
OTU0268	0	0	0	0	0	0	0	0	0	0	0	0	0	0	0	0	0	0	0	0	47	31	45	18	0	0	62	54	69	32	28	38	21	41	35	51	37	59	43	59	0	0	0	0	0	0	0	0	0
OTU0269	0	0	0	0	0	0	0	0	0	0	0	0	0	0	0	0	0	0	0	0	0	0	0	0	0	12	0	0	0	0	0	0	0	0	0	0	0	0	0	28	0	0	0	0	0	0	0	0	0
OTU0270	0	0	0	0	7	0	0	0	0	0	12	0	0	45	0	0	0	0	0	0	21	23	14	21	0	24	25	0	16	9	0	18	0	19	0	0	0	0	0	23	0	0	0	0	0	0	0	0	0
OTU0271	65	0	0	0	0	0	0	0	0	0	0	100	0	0	0	0	0	0	6	0	86	200	116	103	83	69	73	121	50	118	0	0	54	25	41	29	0	50	51	26	0	0	0	0	0	10	0	0	0
OTU0272	0	0	0	0	0	0	0	0	0	0	0	0	0	0	0	0	0	0	0	0	0	12	0	12	23	15	15	9	17	10	0	12	0	0	0	14	0	14	15	29	0	0	0	0	0	0	0	0	0
OTU0273	0	0	0	0	0	0	0	0	0	0	0	0	0	0	0	0	0	0	0	0	0	0	0	0	0	10	0	13	14	0	0	0	0	0	8	0	0	15	0	0	0	0	0	0	0	0	0	0	0
OTU0274	0	0	0	0	0	0	0	0	0	0	0	0	0	0	0	0	0	0	0	0	0	0	0	0	0	0	0	8	0	0	0	0	0	0	0	16	0	0	0	0	0	0	0	0	0	0	0	0	0
OTU0275	0	0	0	0	0	0	0	0	0	0	0	0	0	0	0	0	0	0	0	0	0	0	0	0	0	13	0	0	0	0	0	0	0	0	0	0	0	0	0	0	0	0	0	0	0	0	0	0	0
OTU0276	0	0	0	0	0	0	0	0	0	0	0	0	0	0	0	0	0	0	0	0	0	0	0	0	0	0	0	0	0	0	24	0	0	0	0	32	0	0	0	0	0	0	0	0	0	65	0	0	0
OTU0277	0	0	0	0	0	0	0	0	0	0	0	0	0	0	0	0	0	0	0	0	0	22	13	24	0	0	30	0	0	0	0	0	14	0	0	0	0	14	0	0	0	0	0	0	0	0	0	0	0
OTU0278	0	0	0	0	0	0	0	0	0	0	0	0	0	6	0	0	0	0	0	0	0	0	0	0	0	0	0	0	0	0	0	16	0	0	0	0	0	0	0	29	0	0	0	0	0	0	0	0	0
OTU0279	0	0	0	0	0	0	0	0	0	0	0	0	0	0	0	0	0	0	0	0	26	43	0	0	0	16	0	0	0	0	0	0	0	0	0	0	0	0	11	13	0	0	0	0	0	0	0	0	0
OTU0280	0	0	0	0	0	0	0	0	0	0	0	0	0	0	0	0	0	0	0	0	8	0	0	0	0	0	6	7	0	0	0	0	0	0	0	5	3	0	0	4	0	0	0	0	0	0	0	0	0
OTU0281	0	0	0	0	0	0	0	0	0	0	0	0	0	0	0	0	0	0	0	0	0	11	31	27	0	27	54	23	0	0	0	24	44	0	0	0	18	0	0	13	0	0	0	0	0	0	0	0	0
OTU0282	0	0	0	0	0	0	0	0	0	0	0	64	0	0	0	0	0	0	0	25	17	0	0	0	20	14	0	0	0	0	0	22	0	13	0	0	23	0	15	17	0	9	0	0	0	0	0	0	0
OTU0283	0	0	0	0	0	0	0	0	0	0	0	0	0	0	0	0	0	0	0	0	12	12	0	0	8	0	0	0	0	16	0	0	0	0	0	0	0	0	0	23	0	0	0	15	0	0	0	0	0
OTU0284	0	0	0	0	0	0	0	0	0	0	0	0	0	0	0	0	0	0	0	0	0	0	0	0	0	0	3	0	0	7	0	0	0	0	0	0	0	0	0	0	0	0	0	0	0	0	0	0	0
OTU0285	0	0	0	0	0	0	0	0	0	0	0	0	0	0	0	0	0	0	0	0	0	0	0	0	8	0	0	0	0	0	0	0	0	5	0	0	0	0	0	17	0	0	0	0	0	0	0	0	0
OTU0286	0	0	0	0	0	0	0	0	0	0	0	0	0	0	8	0	0	0	0	0	0	0	0	0	0	0	0	0	0	0	0	0	0	0	0	0	0	0	0	0	0	0	0	0	0	0	0	0	0
OTU0287	0	0	0	0	0	0	0	0	0	0	0	0	0	0	0	0	0	0	0	0	28	0	0	0	0	0	0	0	0	0	0	0	34	0	0	0	24	0	0	0	0	0	0	0	0	0	0	0	0
OTU0288	0	0	0	0	0	0	0	0	0	0	0	0	0	0	0	0	0	0	0	0	0	29	30	0	24	37	47	27	35	30	0	16	35	0	0	32	31	32	29	42	0	0	0	0	0	0	0	0	0
OTU0289	0	8	0	0	0	0	0	0	0	0	0	0	0	0	0	0	0	0	0	0	0	0	0	0	0	0	0	0	0	0	0	0	0	0	0	0	0	0	0	0	0	0	0	0	0	0	0	0	0
OTU0290	0	0	0	0	0	11	0	0	0	0	0	0	0	0	0	0	0	0	0	0	0	0	0	0	0	0	0	0	0	0	0	0	0	0	0	0	0	0	11	0	0	0	0	0	0	0	0	0	0
OTU0291	0	0	0	0	0	20	0	0	0	0	0	0	0	0	0	0	0	0	0	0	0	2	1	0	0	0	0	0	0	0	0	0	0	0	0	0	0	0	0	25	0	0	0	0	0	0	0	0	0
OTU0292	0	0	0	0	57	0	0	0	0	0	63	0	0	0	23	0	0	0	0	0	46	17	0	0	21	0	29	47	0	40	87	0	0	0	0	98	76	52	13	11	0	49	0	0	0	0	0	0	8
OTU0293	0	0	0	0	0	0	0	0	0	0	0	0	0	0	0	0	0	0	0	0	0	0	0	0	0	0	0	0	0	0	0	0	0	0	0	0	0	0	0	0	0	0	7	0	0	24	0	0	0
OTU0294	40	113	0	30	95	93	13	108	29	86	28	215	203	53	335	117	31	167	253	118	267	284	281	155	211	122	210	296	192	203	61	196	134	69	82	145	160	162	160	383	35	37	57	19	0	0	0	36	51
OTU0295	0	0	0	0	0	0	0	0	0	0	0	0	0	0	0	0	0	0	0	0	0	0	0	0	0	0	15	0	0	0	3	0	0	0	6	0	0	0	0	0	0	0	0	0	0	0	0	0	0
OTU0296	0	0	0	0	0	0	0	0	0	0	0	0	0	0	0	0	0	0	0	0	0	0	30	0	41	0	0	0	35	0	0	0	36	31	0	41	0	43	0	60	0	0	0	0	0	0	0	0	0
OTU0297	0	0	0	0	0	0	0	0	0	0	0	0	0	0	0	0	0	0	8	0	18	17	0	15	0	12	23	17	15	10	29	0	0	25	23	32	17	25	38	18	0	5	0	0	0	0	0	0	0
OTU0298	0	0	0	0	87	0	0	0	0	0	0	0	0	0	0	0	0	0	0	0	45	64	0	42	44	32	52	31	41	27	21	0	65	46	27	27	30	28	52	64	0	13	10	15	0	0	0	0	0
OTU0299	0	0	0	0	0	0	0	0	0	0	0	0	0	0	0	0	0	0	0	49	72	62	63	48	42	49	73	46	27	76	53	96	61	66	43	66	40	75	80	64	0	0	11	0	0	25	0	0	0
OTU0300	0	50	0	0	0	35	0	0	0	0	0	0	0	0	0	0	0	0	0	0	0	0	12	0	24	0	0	0	17	0	0	54	0	25	0	40	45	0	0	27	0	0	0	57	0	0	0	0	0
OTU0301	0	0	0	0	0	0	0	0	0	0	0	0	0	0	0	0	0	12	0	0	0	0	0	0	0	0	0	0	0	0	0	0	0	0	0	0	0	0	0	0	0	0	0	0	0	0	0	0	0
OTU0302	0	0	0	0	0	0	0	0	0	0	0	0	0	0	0	0	0	0	0	0	0	0	0	0	0	0	7	0	0	0	0	0	9	0	0	0	0	0	0	0	0	0	0	0	0	0	0	0	0
OTU0303	0	0	0	0	16	0	0	0	0	0	0	7	0	0	0	0	0	0	0	0	0	0	0	0	5	0	0	0	0	0	0	0	37	0	0	0	0	0	0	0	0	0	0	0	0	0	0	0	0
OTU0304	0	0	0	0	0	0	0	0	0	0	0	0	0	0	0	0	0	0	0	0	8	0	0	0	0	0	0	0	0	0	0	13	0	0	0	0	0	0	0	0	0	0	0	0	0	0	0	0	0
OTU0305	0	0	0	0	0	0	0	0	9	21	0	91	27	0	83	0	0	85	0	0	0	27	18	0	0	0	0	0	0	0	0	0	0	0	27	22	0	0	0	0	0	0	0	0	0	0	0	0	0
OTU0306	0	0	0	0	0	0	0	0	0	0	0	0	0	0	0	0	0	0	0	0	0	0	0	0	0	0	0	0	0	0	0	19	0	0	0	0	0	0	0	0	0	13	47	0	0	0	0	0	0
OTU0307	7	0	0	0	0	0	0	0	0	0	0	10	0	27	0	0	0	0	0	0	0	0	0	0	0	15	0	0	0	0	0	0	24	27	0	0	0	0	0	0	0	0	0	0	0	0	0	0	0
OTU0308	0	0	0	0	0	0	0	0	0	0	0	0	0	0	0	0	0	0	0	0	0	0	0	0	0	0	13	0	0	0	0	0	0	0	0	0	0	0	18	0	0	0	0	0	0	0	0	0	0
OTU0309	0	0	0	0	0	0	0	0	0	0	0	0	0	0	0	0	0	0	0	0	0	0	0	0	0	0	0	6	0	6	0	0	0	0	0	0	0	0	0	0	0	0	0	0	0	0	0	0	0
OTU0310	0	0	0	0	0	0	0	0	0	0	0	0	0	0	0	0	0	0	0	0	0	0	0	0	0	0	13	0	0	10	0	0	14	0	0	0	0	0	0	0	0	0	0	0	0	0	0	0	0
OTU0311	0	0	0	0	0	0	0	0	0	0	0	17	0	0	0	0	0	0	0	34	76	83	52	39	127	103	142	111	83	107	66	95	103	78	87	144	89	81	93	135	0	0	0	0	0	0	0	0	0
OTU0312	0	0	0	0	0	0	0	0	0	0	0	0	0	0	0	0	0	0	0	0	0	0	0	0	0	0	0	19	0	0	0	38	0	0	0	0	35	0	0	0	0	0	0	0	0	0	0	0	0
OTU0313	0	0	0	0	0	0	0	0	0	0	0	0	0	0	0	0	0	0	0	0	33	69	15	21	61	56	32	45	68	66	28	43	55	29	43	50	51	39	48	59	0	0	0	0	0	0	0	0	0
OTU0314	0	0	0	0	0	0	0	0	0	0	0	0	0	0	0	0	0	0	0	0	0	0	0	0	0	0	0	0	0	0	0	6	0	0	0	0	0	7	11	0	0	0	0	0	0	0	0	0	0
OTU0315	0	0	0	0	0	0	0	0	0	0	0	0	0	0	0	0	0	0	0	0	0	0	0	0	0	0	0	0	0	3	0	0	0	2	0	0	0	0	6	0	0	12	0	0	0	0	0	0	0
OTU0316	0	9	0	0	0	12	0	0	0	0	0	0	0	0	0	0	0	0	0	13	5	0	0	12	5	7	0	0	0	0	0	0	0	6	0	0	0	4	0	12	0	0	0	0	0	0	0	0	0
OTU0317	0	0	0	0	0	0	0	0	0	0	0	0	0	0	0	0	0	0	0	0	0	26	26	0	0	15	31	0	0	23	0	0	0	20	22	0	0	0	0	0	0	0	0	0	0	0	0	0	0
OTU0318	0	0	0	0	0	0	0	0	0	0	0	0	0	0	0	0	0	0	21	0	0	0	0	0	0	0	0	0	0	0	0	0	26	0	0	0	0	0	0	0	0	0	0	0	0	0	0	0	0
OTU0319	0	0	0	0	0	0	0	0	0	0	0	0	0	0	0	0	0	0	0	0	32	0	0	22	0	0	0	0	19	0	0	0	0	0	0	14	0	0	12	0	0	0	0	0	0	0	0	0	0
OTU0320	0	0	0	0	0	0	0	0	0	0	0	0	0	5	0	0	0	0	0	0	20	15	0	0	23	0	0	16	0	0	21	0	30	26	13	35	49	36	17	37	0	0	23	0	0	55	0	0	0
OTU0321	0	0	0	0	0	0	0	0	0	0	0	0	0	0	0	0	0	0	0	0	0	0	0	45	0	0	0	0	0	0	0	0	0	0	0	0	0	0	0	0	0	0	0	0	0	0	0	0	0
OTU0322	0	0	0	0	0	0	0	0	0	0	0	0	0	0	0	0	0	0	0	0	0	0	0	0	0	0	0	0	19	22	18	0	0	0	0	0	0	0	0	0	0	0	0	0	0	0	0	0	0
OTU0323	0	0	0	0	0	0	0	0	0	0	0	0	0	0	53	23	0	0	0	0	0	0	0	0	0	0	0	0	0	0	0	0	0	0	0	0	0	0	0	0	0	0	0	0	0	0	0	0	0
OTU0324	0	0	0	0	0	0	0	0	0	11	0	0	0	0	0	0	0	0	0	0	0	0	3	0	9	8	7	0	9	0	0	0	0	0	10	4	0	6	0	0	0	0	0	0	0	0	0	0	0
OTU0325	0	0	0	0	0	0	0	0	0	0	0	0	0	0	0	0	0	0	0	0	0	0	8	0	0	0	0	0	8	0	0	6	0	0	0	0	0	0	0	0	0	0	0	0	0	0	0	0	0
OTU0326	0	0	0	0	0	0	0	0	0	0	0	0	0	0	0	0	0	0	0	0	0	7	0	0	5	0	0	0	0	0	0	0	0	0	0	0	0	0	0	0	0	0	0	0	0	0	0	0	0
OTU0327	0	0	0	0	0	0	0	0	44	0	0	0	0	0	0	0	0	0	0	0	0	0	0	0	0	0	0	0	16	0	0	0	0	39	0	0	28	0	0	0	0	0	0	0	0	0	0	0	0
OTU0328	0	0	0	0	0	0	0	0	0	0	0	0	0	0	0	0	0	0	0	0	62	51	67	60	72	32	37	27	31	94	48	20	44	73	18	50	26	13	62	0	0	0	20	0	0	0	0	0	0
OTU0329	0	0	0	0	0	0	0	0	0	0	0	0	0	0	0	0	0	0	0	0	41	0	0	12	0	0	0	0	0	0	58	0	0	0	0	0	15	0	15	31	0	0	0	0	0	0	0	0	34
OTU0330	0	0	0	0	0	0	0	0	0	0	0	0	0	0	0	0	0	0	0	0	15	0	0	0	0	16	13	11	0	20	0	0	15	0	0	9	10	32	11	16	0	0	0	0	0	0	0	0	0
OTU0331	0	0	0	0	0	0	0	0	0	0	0	0	0	0	0	0	0	0	0	0	0	0	0	0	0	0	0	0	0	0	15	0	0	0	0	0	0	0	0	0	0	0	0	0	0	0	0	0	0
OTU0332	0	0	0	0	0	0	0	0	0	0	0	49	22	0	0	0	0	0	0	0	0	0	0	0	0	0	0	0	0	0	0	0	0	0	0	0	0	0	0	14	0	0	0	0	0	0	0	0	15
OTU0333	0	0	0	0	0	0	0	0	0	0	0	0	0	0	0	0	0	0	0	0	0	0	6	0	13	11	22	13	12	0	0	10	19	0	0	21	4	0	15	0	0	0	0	0	0	0	0	0	0
OTU0334	0	0	0	0	0	0	0	0	0	0	0	0	0	0	0	0	0	0	0	0	0	0	0	0	0	0	0	6	0	0	0	0	0	4	0	0	0	0	0	0	0	0	0	0	0	90	0	0	0
OTU0335	0	0	0	0	0	0	0	0	0	0	0	0	0	0	0	0	0	0	0	0	0	7	0	0	15	0	0	5	0	10	0	0	26	0	0	6	0	0	0	0	0	0	0	0	0	0	0	0	0
OTU0336	0	0	0	0	0	0	0	0	0	0	0	0	0	0	0	0	0	16	0	27	0	0	25	0	8	0	15	11	0	12	14	11	0	0	0	0	0	0	19	0	0	0	0	0	0	0	0	0	22
OTU0337	0	0	0	0	0	0	0	0	0	0	0	0	0	0	0	0	0	0	0	0	0	0	0	0	0	0	0	0	0	0	0	0	20	0	20	27	32	0	0	0	0	15	0	0	0	0	0	0	0
OTU0338	0	0	0	0	0	0	0	0	0	0	0	0	0	0	0	0	0	0	0	0	0	0	0	0	0	0	0	0	0	13	0	11	0	12	0	12	0	0	0	0	0	0	0	0	0	0	0	0	0
OTU0339	0	0	0	0	0	0	0	0	0	0	0	0	0	0	0	0	0	15	0	0	0	0	0	0	0	0	0	0	0	0	0	0	0	0	0	0	0	0	0	0	0	0	0	0	0	0	0	0	37
OTU0340	0	0	0	0	0	0	0	0	0	0	0	0	0	0	0	0	0	0	0	0	20	22	19	22	27	29	11	17	29	23	12	17	22	6	14	10	22	41	18	24	0	0	0	0	0	0	0	0	0
OTU0341	0	0	0	0	0	0	0	0	0	0	0	0	10	0	0	0	0	0	0	0	0	0	0	0	0	0	0	0	0	0	0	0	0	0	0	0	0	0	0	0	0	0	0	0	0	0	0	0	0
OTU0342	0	0	0	0	0	0	0	0	0	0	0	0	0	0	0	0	0	0	0	20	0	0	22	0	0	0	23	39	29	0	0	31	48	21	0	0	19	0	0	0	0	0	0	0	0	0	0	0	0
OTU0343	0	0	7	0	29	0	0	0	0	0	32	0	14	0	0	0	0	0	0	0	12	0	0	16	10	0	0	0	0	0	0	0	0	0	0	17	0	38	16	0	5	10	0	40	0	0	0	17	0
OTU0344	0	0	0	0	0	0	0	0	0	0	0	0	0	0	0	0	0	0	0	0	0	0	0	0	0	0	0	0	0	0	0	0	0	0	0	0	0	18	0	0	0	0	0	21	0	0	0	0	0
OTU0345	0	0	0	0	0	0	0	0	0	0	0	0	0	0	0	0	0	0	0	0	74	36	47	68	0	73	92	24	0	26	0	0	0	53	53	58	73	70	0	91	0	0	0	0	0	0	0	0	0
OTU0346	0	0	0	0	0	0	0	0	0	0	0	0	0	0	0	0	0	0	0	0	0	0	9	0	0	0	0	0	0	0	0	0	0	0	0	0	0	0	18	0	0	13	0	0	0	58	0	0	0
OTU0347	0	0	0	0	0	0	0	0	0	0	0	0	0	0	0	0	0	0	0	0	0	0	0	0	0	0	0	0	0	0	0	0	0	0	0	0	0	0	0	0	0	0	0	0	0	23	0	0	0
OTU0348	0	0	0	19	0	0	0	0	0	0	0	0	0	0	0	0	0	0	0	0	0	0	0	0	0	0	0	0	0	0	0	0	0	0	0	0	0	0	0	0	0	0	5	0	0	0	0	0	0
OTU0349	65	243	31	228	167	200	0	105	102	14	38	316	209	98	464	217	0	414	254	280	265	324	281	245	157	240	274	214	188	242	272	349	232	197	128	334	371	394	270	262	56	27	152	0	0	0	50	43	107
OTU0350	0	0	0	0	0	0	0	0	0	0	0	0	0	0	0	0	0	0	0	0	0	0	12	0	0	0	17	0	11	0	0	0	0	10	0	0	0	0	0	15	0	0	0	0	0	0	0	0	0
OTU0351	0	0	0	0	0	0	0	0	0	0	0	0	0	0	0	0	0	0	0	0	0	0	13	0	0	63	28	31	28	25	31	0	0	37	24	30	29	74	40	19	0	0	0	0	0	0	0	0	0
OTU0352	0	0	0	0	0	0	0	0	0	0	0	0	0	0	0	0	0	0	0	0	0	0	0	0	0	0	0	0	0	0	0	0	0	10	0	12	0	0	0	0	0	0	0	0	0	0	0	0	0
OTU0353	0	0	0	0	0	0	0	0	0	0	0	0	0	0	0	0	0	0	0	0	0	0	0	0	0	0	0	0	0	0	0	8	13	0	0	9	0	0	0	0	0	0	0	0	0	0	0	0	0
OTU0354	0	0	0	0	0	0	0	0	0	0	0	0	30	0	0	0	0	0	0	0	140	560	178	272	108	362	105	119	105	231	58	0	73	826	70	85	144	372	57	128	0	0	0	38	0	0	0	10	0
OTU0355	0	0	0	0	0	0	0	0	0	0	0	0	0	0	0	0	0	0	0	0	0	0	0	0	0	0	0	0	0	0	0	22	0	0	0	0	0	0	0	0	0	0	0	0	0	0	0	0	0
OTU0356	0	0	0	0	0	0	0	0	0	0	0	14	0	0	0	0	0	0	0	0	0	0	0	15	0	0	0	0	0	0	0	0	0	0	0	0	0	0	0	0	0	0	0	0	0	0	0	0	0
OTU0357	0	9	0	0	0	0	0	0	0	0	0	0	0	0	0	0	0	9	0	0	0	0	0	0	0	0	0	0	0	0	0	0	0	0	0	0	0	0	0	0	0	0	0	0	0	0	0	0	0
OTU0358	0	0	0	17	0	0	0	0	0	0	0	0	0	0	0	0	0	0	14	7	14	0	0	0	0	0	0	0	0	0	0	0	0	4	0	0	9	0	0	26	0	0	21	0	0	0	0	0	0
OTU0359	0	0	0	0	0	0	0	0	0	0	0	0	0	0	0	0	0	0	0	0	0	0	0	0	0	0	0	0	0	0	0	0	0	0	0	0	0	0	0	0	0	0	0	0	0	0	0	0	20
OTU0360	0	0	0	0	0	0	0	0	0	0	0	0	0	0	0	0	0	0	0	0	0	0	0	0	9	0	5	0	0	0	0	4	0	0	0	0	0	8	0	0	0	0	0	0	0	0	0	0	0
OTU0361	0	0	0	0	0	0	0	0	0	0	0	0	9	69	0	0	0	0	27	0	0	0	0	0	0	0	0	0	0	0	0	0	0	0	0	0	0	0	0	0	0	0	0	0	0	63	0	0	0
OTU0362	0	0	0	0	0	0	0	0	0	0	0	0	0	0	0	0	0	0	0	0	0	0	0	0	0	0	0	0	0	0	0	0	0	0	0	0	0	0	0	0	4	0	0	0	35	0	0	0	0
OTU0363	0	0	0	0	11	0	0	0	0	0	0	0	0	0	0	0	0	0	0	0	0	10	18	11	0	23	11	14	8	0	11	15	9	16	13	7	11	19	11	0	0	0	0	0	0	0	0	0	0
OTU0364	0	0	0	0	0	0	0	0	0	0	0	0	0	0	8	0	0	0	0	0	0	0	0	0	0	0	0	0	0	0	0	0	0	0	0	0	4	0	0	0	0	0	0	0	8	0	0	0	0
OTU0365	0	0	0	0	25	0	0	0	0	0	0	0	0	0	0	0	0	0	0	0	0	0	0	0	0	0	0	0	0	0	0	0	0	0	0	0	0	0	0	0	0	0	0	0	0	0	0	0	0
OTU0366	10	0	0	7	0	0	0	0	0	18	0	0	0	0	5	0	7	0	0	0	0	0	0	0	0	0	3	3	0	0	0	0	6	4	0	0	0	0	0	21	0	9	15	10	28	0	49	0	24
OTU0367	0	0	0	0	0	0	0	0	0	0	0	0	0	0	0	0	0	0	0	0	0	0	0	0	2	0	0	0	0	0	0	0	0	0	0	0	0	0	0	0	28	0	0	0	0	15	0	0	0
OTU0368	0	0	0	0	0	0	0	0	0	0	0	0	0	0	0	0	0	0	8	0	18	25	30	12	19	30	86	30	25	30	21	27	35	51	24	29	30	39	31	45	0	21	0	0	0	0	0	0	0
OTU0369	0	0	0	0	0	0	0	0	0	0	0	0	0	0	0	0	0	0	0	0	0	6	15	0	11	0	7	19	0	0	0	0	0	1	0	0	0	3	0	0	0	0	0	0	0	0	0	4	0
OTU0370	0	0	0	0	0	0	0	0	0	0	0	0	0	0	0	0	0	0	0	0	0	0	0	14	0	0	11	0	0	20	16	0	8	21	0	7	0	0	15	5	0	0	0	0	0	0	0	0	0
OTU0371	0	0	0	0	0	0	0	0	0	0	0	0	0	0	0	0	0	0	0	0	0	0	0	0	0	0	0	5	0	0	0	0	22	0	0	5	0	11	0	8	0	0	0	0	0	0	0	0	0
OTU0372	0	0	0	0	0	0	0	0	15	0	0	0	0	0	0	0	0	0	0	0	0	0	0	0	0	0	0	2	0	0	0	0	0	0	0	0	0	0	0	0	0	0	0	0	0	0	0	0	0
OTU0373	0	0	0	0	0	0	0	0	0	0	0	0	0	0	0	0	0	0	0	0	0	0	0	0	0	0	0	0	0	7	4	0	0	0	0	0	0	0	7	5	0	0	0	0	0	0	0	0	0
OTU0374	0	0	0	0	0	0	0	0	0	0	0	0	0	0	0	0	0	0	0	0	0	5	3	0	0	0	0	0	17	7	0	0	19	0	0	0	0	0	3	0	0	0	0	0	0	0	0	0	0
OTU0375	0	0	0	0	0	0	0	0	0	0	0	0	0	0	0	0	0	0	0	0	0	0	0	0	0	0	0	0	0	0	4	0	0	0	0	0	0	0	0	0	0	0	0	0	0	0	0	0	0
OTU0376	0	0	0	0	0	0	0	0	0	0	0	0	0	0	0	0	0	0	0	0	0	0	14	20	0	0	11	0	16	25	16	24	21	31	0	0	17	0	16	19	0	0	0	0	0	0	0	0	0
OTU0377	0	0	0	0	0	13	0	0	0	0	0	0	0	0	31	0	0	0	17	0	10	0	0	0	7	16	16	0	14	7	0	22	0	0	0	0	11	0	8	33	0	0	0	0	0	0	0	7	0
OTU0378	0	0	0	0	0	0	0	0	0	0	0	0	0	0	0	0	0	0	0	0	0	0	0	0	0	0	0	6	0	0	0	0	0	0	0	0	0	0	0	0	0	0	0	0	0	0	0	0	0
OTU0379	0	0	0	0	0	0	0	0	0	0	0	0	0	0	0	0	0	0	0	0	29	34	22	21	32	28	30	26	20	16	0	0	28	42	32	22	26	44	32	54	0	0	0	0	0	0	0	0	0
OTU0380	0	0	0	0	0	0	0	0	0	0	0	0	0	0	0	0	0	0	0	0	9	0	0	0	0	0	0	0	0	0	5	0	0	0	0	0	0	0	0	0	0	0	0	0	0	0	0	0	0
OTU0381	0	0	0	0	0	0	0	0	0	0	0	0	0	0	0	0	0	0	0	38	0	0	16	0	10	0	15	18	0	14	0	20	22	0	15	0	17	47	15	23	0	0	0	0	0	27	0	0	0
OTU0382	0	0	0	0	0	0	0	0	0	0	0	0	0	0	0	0	0	0	0	98	0	0	0	0	0	0	0	0	0	0	0	0	0	0	0	0	0	0	0	0	0	0	0	0	0	0	13	0	30
OTU0383	99	50	0	60	52	30	47	78	55	52	155	131	142	75	252	152	61	191	187	113	225	265	244	258	274	251	274	200	253	244	102	233	147	170	127	254	134	262	225	215	129	144	172	51	169	45	119	115	112
OTU0384	0	0	0	0	0	0	0	0	0	0	0	0	0	0	0	0	0	0	0	0	0	26	0	0	31	36	21	0	27	19	0	0	0	0	29	29	22	27	24	28	0	0	0	0	0	0	0	0	0
OTU0385	0	0	0	0	0	0	0	0	0	0	0	0	0	0	0	0	0	0	0	0	0	0	12	13	7	0	0	0	27	0	0	0	0	0	0	0	0	0	0	0	0	0	0	0	0	0	0	0	0
OTU0386	0	0	0	0	0	0	0	0	0	0	0	0	0	0	0	0	0	0	0	0	0	0	0	0	0	0	0	0	0	0	0	0	0	21	15	0	0	0	0	0	0	0	0	0	0	0	0	0	0
OTU0387	0	0	92	0	0	0	0	0	0	41	95	60	0	42	98	0	0	0	42	81	214	547	298	413	52	462	584	243	349	340	220	362	237	378	170	281	126	189	190	237	99	0	137	14	97	650	43	0	26
OTU0388	0	0	0	0	0	0	0	0	0	0	0	0	0	0	0	0	0	0	0	0	15	13	0	0	0	0	14	0	0	0	0	0	13	0	0	0	0	0	0	16	0	0	0	0	0	0	0	0	0
OTU0389	0	0	0	0	0	0	0	0	0	0	0	0	0	0	0	0	0	0	0	0	0	17	16	0	14	0	0	20	0	14	70	0	26	0	0	23	0	22	12	22	0	0	0	0	0	0	0	0	0
OTU0390	0	0	0	0	0	0	0	0	0	0	0	0	0	0	0	0	0	0	0	0	0	0	0	0	0	0	0	0	0	0	0	0	0	0	0	0	0	0	0	0	0	0	33	0	0	79	25	0	0
OTU0391	0	0	0	0	0	0	0	0	0	0	0	0	0	0	7	0	0	0	0	0	26	34	25	0	0	18	31	0	0	0	0	37	32	29	20	0	31	27	32	34	0	0	0	0	0	0	0	0	0
OTU0392	0	0	0	0	0	0	0	0	0	0	0	11	0	0	0	0	0	0	0	0	0	0	0	0	0	0	0	0	0	7	17	0	0	0	0	0	0	0	0	0	0	0	0	0	0	0	0	0	0
OTU0393	0	0	0	0	0	0	0	0	0	0	0	0	0	0	0	0	0	0	0	21	0	77	56	92	46	51	59	76	70	43	75	93	75	93	61	72	99	46	65	82	0	0	0	0	0	0	0	0	0
OTU0394	0	0	0	0	0	0	0	0	0	0	0	0	0	0	0	0	0	0	0	0	0	0	0	0	8	0	0	0	0	0	0	0	0	0	0	0	0	0	0	0	0	0	0	0	0	0	0	0	0
OTU0395	0	0	0	0	0	0	0	0	0	0	0	0	0	0	0	0	0	0	0	0	11	22	11	0	14	16	9	9	9	16	0	12	15	19	10	18	0	0	10	21	0	0	0	0	0	0	0	0	0
OTU0396	0	0	0	0	0	0	0	0	0	0	0	0	0	0	0	0	0	0	0	0	0	0	0	0	0	0	0	0	0	0	0	0	0	0	0	0	0	0	0	0	0	0	75	0	0	0	0	0	0
OTU0397	0	0	0	0	0	0	0	0	0	0	0	0	0	0	0	0	0	0	0	0	24	8	12	23	14	18	9	0	9	0	0	15	0	0	0	0	12	0	0	18	0	0	0	0	0	0	0	0	0
OTU0398	0	0	0	0	0	0	0	0	0	0	0	0	0	0	0	0	0	0	0	0	0	9	0	0	0	16	0	0	0	0	0	0	0	0	0	0	0	0	0	15	0	0	0	0	0	0	0	0	0
OTU0399	0	0	0	0	0	0	0	4	0	0	0	0	0	0	0	0	0	0	0	0	0	0	0	0	0	0	0	0	0	0	0	0	0	0	0	0	0	0	12	0	0	0	0	0	0	0	0	0	0
OTU0400	0	0	0	0	0	0	0	0	0	0	0	0	0	0	0	0	0	0	0	0	0	0	0	0	0	0	0	7	0	0	0	0	0	0	0	0	4	0	0	0	0	0	0	0	0	0	0	0	0
OTU0401	0	0	0	0	0	0	0	0	0	0	0	0	0	0	0	0	0	0	0	0	0	0	0	0	0	0	0	0	0	0	0	0	0	0	0	0	0	0	0	0	0	0	3	0	0	0	0	0	0
OTU0402	0	0	0	0	0	0	0	0	0	0	0	0	0	0	0	0	0	0	0	0	8	15	9	8	0	0	0	10	0	13	19	0	0	15	0	6	18	0	0	0	0	11	0	0	0	0	0	0	0
OTU0403	0	0	0	0	0	0	0	0	0	0	0	0	0	0	0	0	0	0	0	0	0	10	0	0	0	0	0	0	0	0	0	0	0	0	0	0	18	0	0	0	0	0	0	0	0	0	0	0	0
OTU0404	0	0	0	0	0	0	0	0	0	0	0	0	0	0	0	0	0	0	0	0	0	0	0	0	0	0	0	0	0	0	0	4	0	0	8	0	0	0	0	0	0	0	0	0	0	0	0	0	0
OTU0405	0	0	0	0	0	0	0	0	0	0	0	0	0	0	0	0	0	0	0	0	0	0	0	0	0	0	0	0	0	0	0	0	0	0	0	0	21	0	0	22	0	0	0	0	0	0	0	0	0
OTU0406	0	0	0	0	0	0	0	0	5	0	0	0	14	0	0	11	0	0	0	0	0	0	0	0	0	0	0	0	0	0	0	0	0	0	0	0	0	0	0	0	48	0	26	0	32	0	16	0	16
OTU0407	0	0	0	0	0	0	0	0	0	0	0	0	0	0	0	0	0	0	0	0	0	0	0	0	0	0	11	0	8	0	7	0	0	0	0	0	5	0	14	0	0	0	0	0	0	0	0	0	0
OTU0408	15	74	0	68	42	85	32	24	47	114	0	0	21	0	53	38	16	0	0	0	0	0	0	0	0	0	0	0	0	0	0	0	0	0	0	0	0	0	0	0	0	0	0	0	0	0	0	26	68
OTU0409	0	0	0	0	0	0	0	0	0	0	0	0	0	0	0	0	0	0	0	0	0	11	0	0	0	0	0	0	0	0	0	0	0	0	0	0	0	0	0	0	0	23	0	0	0	14	0	0	0
OTU0410	0	0	0	0	0	0	0	0	0	0	0	0	0	0	0	0	0	0	0	0	38	49	37	0	35	41	55	0	47	0	0	63	21	0	63	40	39	39	99	48	18	0	0	0	0	0	0	0	0
OTU0411	0	25	0	0	0	0	0	0	0	0	6	0	0	9	0	0	14	0	0	0	0	0	0	0	14	0	0	0	0	0	0	0	0	43	0	14	0	0	0	0	22	0	0	0	0	0	0	0	0
OTU0412	0	0	0	0	0	0	0	0	0	0	0	0	0	0	0	0	0	0	0	0	21	19	27	41	22	18	22	0	29	27	0	0	0	17	18	25	31	0	21	35	0	0	0	0	0	0	0	0	0
OTU0413	0	0	0	0	0	0	0	0	0	0	0	0	0	0	0	0	0	0	0	0	0	13	0	0	0	0	0	0	0	0	0	0	19	0	0	0	0	16	0	0	0	0	0	0	0	0	0	0	0
OTU0414	0	0	0	0	0	0	0	0	0	0	0	0	0	0	0	0	0	0	0	0	0	0	0	0	0	0	11	6	0	0	0	0	0	0	0	0	0	0	0	0	0	0	0	0	0	0	0	0	0
OTU0415	0	0	0	0	0	0	0	0	0	0	0	0	0	0	0	0	0	0	0	0	0	0	0	0	0	0	0	0	0	29	0	0	0	0	0	0	0	0	0	0	0	0	0	0	0	0	0	0	0
OTU0416	61	0	0	0	17	0	0	0	29	0	36	0	0	0	0	0	0	0	0	93	0	66	27	8	27	0	0	14	0	40	0	48	0	0	0	0	0	9	10	13	0	0	0	30	20	0	0	0	0
OTU0417	16	7	0	10	11	0	0	0	0	0	10	0	0	100	0	0	0	0	0	0	43	104	48	28	0	39	27	36	21	111	32	32	35	83	34	35	42	58	75	50	23	0	22	0	29	0	0	0	0
OTU0418	0	0	0	0	0	0	0	0	0	0	0	0	0	0	0	0	0	0	0	11	0	0	0	0	0	5	0	0	0	0	0	0	0	0	5	0	0	0	0	0	0	0	0	0	0	0	0	0	0
OTU0419	0	0	0	13	11	13	0	0	8	0	0	0	0	0	0	0	0	0	0	0	8	18	0	7	15	11	21	18	73	0	0	0	0	0	0	0	0	0	0	20	15	0	0	0	0	0	0	0	0
OTU0420	0	0	0	0	0	0	0	0	0	0	0	0	0	0	0	0	0	0	0	0	0	0	0	0	0	0	0	0	0	0	0	0	0	0	0	0	0	0	0	0	0	0	19	0	0	17	0	0	0
OTU0421	0	0	0	0	0	0	0	0	0	0	0	0	0	0	0	0	0	0	0	0	6	0	0	0	0	0	0	0	0	0	0	0	0	22	0	13	9	0	68	0	0	0	0	0	0	0	0	0	0
OTU0422	0	0	0	0	0	0	0	0	0	0	0	0	0	0	0	0	0	0	0	0	0	0	0	0	0	0	0	0	0	0	0	0	0	0	0	0	0	0	0	0	0	0	0	0	0	0	0	0	39
OTU0423	0	0	0	0	0	0	0	0	0	0	0	0	0	0	0	0	0	0	0	0	0	7	0	0	8	0	0	0	0	0	0	17	8	0	0	0	7	0	0	30	0	0	0	0	0	0	0	0	0
OTU0424	0	0	0	0	0	0	0	0	0	0	0	0	0	0	0	0	0	0	0	0	13	0	7	7	0	11	8	0	8	7	0	0	16	0	0	12	0	7	6	7	0	0	0	0	0	0	0	0	0
OTU0425	0	0	0	0	0	0	0	0	0	0	0	0	0	13	0	0	0	0	0	0	0	0	14	0	0	0	0	0	0	0	0	0	0	0	0	0	0	0	0	0	0	0	9	7	0	0	0	0	0
OTU0426	27	0	0	0	0	0	0	0	0	0	0	0	0	0	0	0	0	0	0	0	29	0	0	0	0	0	0	0	0	0	0	0	0	0	0	0	0	0	0	0	0	0	0	0	0	0	0	0	0
OTU0427	0	0	0	0	6	0	0	0	4	0	0	0	0	0	0	0	0	0	0	0	0	4	0	0	0	0	0	0	0	0	0	0	0	0	0	0	0	0	0	0	0	0	0	0	0	0	0	0	0
OTU0428	0	0	0	0	0	0	0	0	0	0	0	41	19	0	0	0	0	0	0	0	0	0	0	0	0	6	0	0	0	0	0	0	0	0	0	0	0	0	0	0	0	0	0	0	0	0	0	0	0
OTU0429	0	0	0	0	0	0	0	0	0	0	0	0	0	0	0	0	0	0	0	0	0	0	0	0	0	8	10	6	0	0	0	0	0	0	6	0	0	0	8	0	0	0	0	0	0	0	0	0	0
OTU0430	0	0	0	0	0	22	0	0	0	0	0	0	0	0	0	0	0	0	0	0	0	0	0	0	0	0	0	0	0	0	0	0	0	0	0	0	0	0	0	0	0	0	0	0	0	0	0	0	0
OTU0431	0	0	0	0	0	0	0	0	0	0	0	0	0	0	0	0	0	0	0	0	0	0	0	0	11	0	0	0	0	0	0	0	0	0	0	0	0	0	0	0	0	0	0	0	0	0	0	0	0
OTU0432	0	0	0	0	0	0	0	0	0	0	0	0	0	0	0	0	0	0	0	0	0	0	0	0	0	0	10	0	21	6	0	7	0	8	11	0	0	0	8	13	0	0	0	0	0	0	0	0	0
OTU0433	0	0	0	0	0	0	0	0	0	0	0	0	0	0	0	0	0	0	0	0	3	0	0	0	0	0	0	0	0	0	0	0	0	0	0	0	0	0	0	0	0	0	0	0	0	0	0	0	0
OTU0434	0	0	0	0	0	0	0	0	0	0	0	0	0	20	0	0	0	0	0	0	8	0	0	34	15	23	20	0	21	0	0	0	0	0	28	0	0	9	0	24	0	0	0	0	0	0	0	0	0
OTU0435	0	0	0	0	0	0	0	0	0	0	0	0	0	0	0	0	0	0	0	0	0	0	0	0	0	0	0	0	0	0	0	0	0	0	0	0	0	0	0	0	0	0	12	0	0	19	0	0	0
OTU0436	0	0	0	0	0	0	0	0	0	0	0	0	0	0	0	0	0	0	0	0	0	0	0	0	0	0	16	0	0	15	0	0	0	0	0	0	0	7	0	0	0	0	0	0	0	0	0	0	0
OTU0437	0	0	0	0	8	0	0	0	0	0	0	0	0	0	0	0	5	0	0	0	0	0	0	0	0	0	0	0	0	0	0	0	0	0	0	0	0	0	0	0	3	0	0	0	0	0	0	0	0
OTU0438	14	10	0	17	0	0	0	0	0	0	0	0	0	0	26	0	0	0	0	0	0	0	0	0	0	0	0	0	0	0	0	0	0	0	0	0	0	0	0	0	0	0	0	0	0	0	0	0	0
OTU0439	0	0	0	0	0	0	0	0	0	0	0	0	0	0	0	0	0	0	0	0	0	0	0	0	0	0	0	0	0	0	0	0	0	0	0	0	0	0	0	0	0	0	0	0	0	0	0	0	0
OTU0440	0	0	0	0	0	0	0	0	0	0	0	0	0	0	0	0	0	0	0	0	0	16	12	17	0	0	18	30	0	0	10	0	0	0	6	19	0	11	19	0	0	0	0	17	0	0	0	0	0
OTU0441	0	0	0	0	0	0	0	0	0	0	0	0	0	0	0	0	0	0	0	0	0	0	0	8	0	8	0	0	7	6	0	0	9	0	0	0	18	11	13	12	0	0	0	0	0	0	0	0	0
OTU0442	0	0	0	0	0	0	0	0	0	0	0	0	0	0	0	0	0	0	0	0	0	0	0	0	0	0	0	0	0	0	0	0	0	0	0	0	0	0	0	0	0	0	0	0	0	0	0	0	0
OTU0443	0	0	0	0	0	0	0	0	0	0	0	0	0	13	0	5	0	0	0	16	61	112	101	51	104	113	119	121	113	103	107	94	182	57	74	128	113	104	81	101	0	19	0	32	26	0	0	0	19
OTU0444	0	0	0	0	0	0	0	0	0	0	0	0	0	0	0	0	0	0	0	10	18	22	12	12	0	10	14	12	0	25	30	0	15	22	8	0	20	28	0	25	0	0	0	0	0	0	0	0	0
OTU0445	0	0	0	0	0	0	0	0	0	0	0	0	0	0	0	0	0	0	0	0	0	0	0	0	0	0	0	0	0	0	0	0	0	0	0	0	51	0	19	0	0	0	0	0	0	0	0	0	0
OTU0446	0	0	0	0	0	5	0	0	0	0	0	0	0	0	0	0	0	0	0	0	0	0	0	0	0	10	0	15	11	0	0	0	0	0	0	10	20	0	0	0	0	0	0	0	0	0	0	0	0
OTU0447	0	18	0	37	0	18	10	0	0	32	0	0	0	0	0	0	0	0	0	0	0	0	0	0	0	0	0	0	10	17	0	0	0	0	8	0	8	12	0	0	0	0	0	0	47	0	0	0	26
OTU0448	0	0	0	0	0	0	0	0	0	0	0	0	0	0	0	0	0	0	0	0	0	0	0	0	0	18	0	18	0	0	0	16	0	20	0	0	0	15	12	0	0	0	0	0	0	0	0	0	0
OTU0449	0	0	0	0	0	0	0	0	0	0	0	0	0	0	0	0	0	0	0	0	0	10	0	0	0	26	0	0	8	0	0	0	0	0	0	5	0	0	0	8	0	0	0	0	0	0	0	0	0
OTU0450	0	0	0	0	0	0	0	0	0	0	0	115	0	0	57	0	0	46	57	16	0	13	19	0	0	0	0	0	0	0	0	0	0	0	0	0	23	12	13	16	0	0	0	0	0	0	0	0	0
OTU0451	0	0	0	0	0	0	0	0	0	0	0	0	0	0	0	0	0	0	0	0	0	0	0	0	0	0	0	0	0	0	0	0	0	0	0	0	0	0	0	6	0	0	0	0	0	0	0	0	16
OTU0452	0	0	0	0	0	0	0	0	0	0	0	0	0	20	0	0	0	0	0	11	28	0	34	16	34	43	0	0	23	45	0	24	41	38	26	40	47	0	45	0	0	6	0	0	0	0	0	0	0
OTU0453	0	0	0	0	0	0	0	0	0	0	0	0	0	0	0	0	0	0	0	0	0	0	5	0	0	0	14	0	19	0	0	20	8	0	0	13	0	0	0	10	0	0	0	0	0	0	0	0	0
OTU0454	0	0	0	0	22	0	0	0	0	0	0	0	0	0	0	0	0	27	0	0	0	0	0	0	0	0	0	0	0	0	0	0	0	0	0	0	0	0	0	0	0	0	0	0	0	0	0	0	0
OTU0455	0	0	0	0	0	0	0	0	0	0	0	0	0	0	0	0	0	0	0	0	0	0	0	0	0	0	8	0	0	0	0	0	0	0	11	0	0	0	0	0	0	0	0	0	0	0	0	0	0
OTU0456	0	0	0	0	0	0	0	0	0	0	0	0	0	0	0	0	0	0	0	0	4	0	0	0	6	0	0	0	0	0	0	0	0	0	0	0	0	0	0	0	0	0	0	0	0	0	0	0	0
OTU0457	0	0	0	0	0	0	0	0	0	0	0	0	0	0	0	0	0	0	0	0	0	0	0	0	0	0	0	0	0	0	0	0	0	0	0	0	0	0	0	0	0	0	0	0	0	0	0	0	0
OTU0458	0	0	0	0	0	0	0	0	0	0	0	0	0	0	0	0	0	0	0	0	26	24	0	0	20	26	33	27	16	17	23	33	26	0	0	0	0	0	22	33	12	0	70	0	0	132	0	0	0
OTU0459	0	0	0	0	0	0	0	0	0	0	0	0	0	0	6	0	0	0	0	0	0	0	0	0	4	0	0	2	0	0	0	0	0	0	0	0	0	0	0	0	0	0	0	0	0	0	0	0	18
OTU0460	0	0	0	0	0	0	0	0	0	0	0	0	0	0	0	0	0	0	0	17	4	0	0	21	0	0	0	0	0	0	0	0	0	0	0	0	0	0	0	5	0	0	0	0	0	0	0	0	0
OTU0461	0	0	0	0	0	0	0	0	0	0	0	0	0	0	0	0	0	0	0	0	0	0	0	0	0	0	0	0	0	0	0	0	0	0	0	0	0	0	0	0	0	0	16	0	0	70	0	0	0
OTU0462	0	0	0	0	0	0	0	0	0	0	0	0	0	3	0	0	0	0	0	0	0	0	12	0	0	0	0	0	8	0	0	0	0	8	12	0	0	6	0	13	0	0	0	0	0	0	0	0	0
OTU0463	0	0	0	0	0	0	0	0	0	0	0	0	0	0	0	0	0	0	0	0	0	0	0	13	0	0	0	0	0	0	0	0	0	0	0	0	0	0	0	0	0	3	0	0	0	0	0	0	0
OTU0464	0	0	0	0	0	0	0	0	0	0	0	0	15	0	24	0	0	0	0	0	0	0	0	0	0	0	0	0	0	0	0	0	0	0	0	0	0	13	0	0	0	0	0	0	0	0	0	0	0
OTU0465	0	0	0	0	0	0	0	0	0	0	0	0	0	0	0	0	0	0	0	0	0	0	0	0	0	0	0	0	0	14	0	0	11	0	0	0	0	0	0	0	0	0	0	0	0	0	0	0	0
OTU0466	0	0	0	0	0	0	0	0	0	0	0	0	0	0	0	0	0	0	0	0	0	0	0	0	0	0	0	0	6	0	0	0	0	0	0	0	0	0	0	0	0	0	0	0	0	0	0	0	0
OTU0467	0	0	0	0	0	0	0	0	15	0	0	0	0	0	0	0	0	0	0	0	0	0	0	0	0	0	13	0	0	0	0	0	0	0	0	0	0	0	0	0	0	0	0	0	0	0	0	0	0
OTU0468	0	0	0	0	0	0	0	0	0	0	0	0	0	0	0	0	0	0	0	0	0	0	0	0	0	0	0	0	0	0	13	0	0	0	0	0	0	0	0	0	0	0	0	0	0	0	0	0	0
OTU0469	0	0	0	0	0	0	0	0	0	0	0	0	0	0	0	0	0	0	0	0	0	0	0	0	0	0	0	0	0	0	0	0	0	0	0	4	6	0	0	0	0	0	0	0	0	0	0	0	0
OTU0470	0	0	0	0	0	0	0	0	0	0	0	0	0	0	0	0	0	0	0	0	3	0	5	0	0	0	0	0	0	0	0	0	0	0	0	10	0	0	4	0	0	0	0	0	0	0	0	0	0
OTU0471	0	0	0	0	0	0	0	0	0	0	0	0	0	0	0	0	0	0	0	0	0	0	9	0	0	0	0	0	0	0	0	0	0	0	0	0	0	0	0	0	0	0	32	0	0	0	0	0	0
OTU0472	0	69	11	48	107	58	0	31	17	73	88	142	32	36	44	0	0	46	75	77	29	117	69	25	34	29	138	46	87	102	48	32	81	45	30	16	77	22	180	0	0	25	39	87	34	83	0	33	52
OTU0473	0	0	0	0	0	0	0	0	0	0	0	0	0	0	0	0	0	0	0	0	0	11	0	10	0	0	0	0	11	0	0	0	13	0	0	0	0	11	0	8	0	0	0	0	0	0	0	0	0
OTU0474	0	0	0	0	0	0	0	0	0	0	0	0	0	0	0	0	0	0	0	0	44	158	44	52	45	60	128	92	49	91	38	0	38	125	18	0	180	87	62	42	0	0	0	0	0	0	0	13	0
OTU0475	0	0	0	0	0	0	0	0	0	0	0	0	0	0	0	0	0	0	0	0	0	0	0	0	0	0	0	0	0	0	0	0	0	0	0	0	0	0	0	0	0	0	0	0	0	82	21	0	0
OTU0476	0	0	0	0	22	0	0	0	0	0	0	22	0	34	0	0	0	0	0	19	0	0	0	0	0	0	0	0	15	0	0	0	0	0	9	0	53	13	16	17	0	0	31	0	0	93	0	0	0
OTU0477	0	0	0	0	0	0	0	0	0	0	0	0	0	0	0	0	0	0	0	0	0	0	0	0	8	0	0	0	0	0	0	0	0	0	0	6	0	0	0	0	0	0	0	0	0	0	0	0	0
OTU0478	0	0	0	0	0	0	0	0	0	0	0	0	0	0	0	0	0	0	0	0	0	0	0	0	0	0	0	3	0	7	0	0	12	0	0	9	4	9	0	0	0	0	0	5	0	0	0	0	0
OTU0479	0	0	0	0	0	0	0	0	0	0	0	0	0	0	0	0	0	0	0	0	0	0	18	0	0	0	0	0	10	0	0	0	0	0	0	0	0	0	0	0	0	0	0	0	0	0	0	0	0
OTU0480	0	0	0	0	0	9	0	0	0	0	0	19	0	0	0	0	0	26	0	0	7	12	0	0	0	10	6	0	0	0	0	0	3	0	0	2	0	0	8	0	0	0	0	0	0	0	4	0	0
OTU0481	0	0	0	0	0	0	0	0	0	0	0	0	0	0	0	0	0	0	0	0	0	0	0	0	0	0	0	0	0	0	31	0	0	0	0	0	0	0	24	0	0	0	0	0	0	0	0	0	0
OTU0482	0	0	0	0	0	0	0	0	0	0	0	0	0	0	0	0	0	0	0	0	5	0	0	0	0	0	0	0	0	15	0	23	19	0	25	14	16	0	0	19	0	0	0	0	0	0	0	0	0
OTU0483	0	0	0	0	0	0	0	0	0	0	0	0	0	0	0	0	0	0	0	0	0	0	0	0	0	0	0	0	0	59	0	0	0	0	0	0	0	0	0	0	0	0	0	0	0	0	0	0	0
OTU0484	0	0	0	0	0	0	0	0	0	0	0	0	0	0	0	0	0	0	0	0	0	0	0	0	0	0	0	0	18	0	0	0	0	0	0	0	0	0	0	0	0	0	0	0	0	0	0	0	19
OTU0485	0	0	0	0	0	0	0	0	0	0	0	0	0	0	0	0	0	0	0	0	0	0	0	0	0	0	0	0	0	10	0	0	0	0	0	0	0	0	0	0	0	0	0	0	0	0	0	0	0
OTU0486	0	0	0	0	0	0	0	0	0	0	0	0	0	0	0	0	0	0	0	0	23	0	0	33	0	0	0	0	0	36	0	0	0	0	0	0	0	0	0	0	0	0	0	0	0	0	0	0	0
OTU0487	0	0	0	0	0	0	0	0	0	0	0	0	0	0	0	0	0	0	0	0	0	14	0	0	0	0	0	0	0	0	0	0	0	11	10	0	0	22	6	16	0	0	0	0	0	0	0	0	0
OTU0488	0	0	0	0	0	0	0	0	0	0	0	0	0	0	0	0	0	0	0	0	5	0	0	11	0	0	0	0	0	0	0	0	0	0	0	0	0	0	0	0	0	0	0	0	0	0	0	0	0
OTU0489	0	0	0	0	0	0	0	0	0	0	0	0	0	0	0	0	0	0	0	0	0	0	0	0	0	0	0	0	0	0	25	0	0	0	0	0	0	0	7	0	19	0	56	0	0	104	0	0	0
OTU0490	0	0	0	0	0	0	0	0	0	0	0	0	0	0	0	0	0	0	0	0	0	0	0	0	0	0	39	22	0	26	0	22	0	0	0	0	0	0	0	60	0	0	0	0	0	0	0	0	0
OTU0491	0	0	0	0	0	0	0	0	0	0	0	13	0	0	0	0	0	0	0	0	30	0	0	0	0	0	0	0	0	0	0	0	0	0	0	0	0	0	0	0	0	0	0	0	0	0	0	0	0
OTU0492	0	0	0	0	0	0	0	0	0	0	0	0	0	0	0	0	0	0	0	0	0	0	0	0	0	0	0	0	0	12	0	0	10	11	0	17	15	0	0	21	0	0	0	0	0	0	0	7	0
OTU0493	0	0	0	0	0	0	0	0	0	0	0	0	0	20	0	0	0	0	0	0	0	0	0	0	23	0	0	0	17	0	0	13	0	0	44	49	31	0	0	47	0	0	0	0	0	13	0	0	0
OTU0494	0	0	0	0	0	0	0	0	0	0	0	0	0	0	0	0	0	0	0	0	67	0	0	0	0	0	73	0	0	0	0	0	0	0	0	0	0	0	0	12	0	0	0	0	0	0	0	0	0
OTU0495	0	0	0	0	0	0	0	0	0	0	0	0	0	0	0	0	0	0	0	0	0	0	0	0	0	0	0	8	0	0	0	8	0	0	0	0	0	0	0	0	0	0	0	0	0	0	0	0	0
OTU0496	0	0	0	0	0	0	0	0	0	0	0	0	0	0	0	0	0	0	0	0	0	0	0	0	0	0	0	0	0	0	0	0	0	0	0	0	0	0	0	0	0	15	151	0	0	99	0	0	0
OTU0497	0	0	0	0	0	0	0	0	0	0	0	0	0	0	0	0	0	0	0	0	0	0	0	18	0	16	0	0	0	0	12	0	0	0	0	29	15	17	21	33	0	0	0	0	0	0	0	0	0
OTU0498	0	0	0	0	0	0	0	0	0	0	0	0	0	0	0	0	0	0	14	0	10	20	0	26	0	25	0	0	0	16	0	0	38	22	0	20	10	25	0	29	0	0	0	0	0	0	0	0	0
OTU0499	0	0	0	0	0	0	0	0	0	0	0	0	0	0	0	0	0	0	0	0	0	0	0	0	0	0	0	0	18	0	0	0	0	0	0	12	8	10	0	0	0	0	0	0	0	0	0	0	0
OTU0500	0	0	0	0	0	0	0	0	0	0	0	0	0	0	9	0	0	0	0	0	0	0	0	0	0	0	0	0	0	0	0	0	0	0	0	0	0	0	0	0	0	0	0	0	0	0	0	0	0
OTU0501	0	0	0	0	0	0	0	0	0	0	38	0	0	25	0	0	0	0	0	26	0	0	0	0	0	0	0	0	0	0	0	0	0	0	0	0	0	0	0	0	0	0	51	0	0	59	0	0	0
OTU0502	0	0	0	0	0	0	0	0	0	0	0	0	0	0	0	0	0	0	0	0	0	10	0	6	0	10	12	0	0	10	10	16	8	18	0	16	0	11	0	0	0	0	0	0	0	0	0	0	0
OTU0503	0	0	0	0	0	0	0	0	0	0	0	0	0	0	0	0	0	0	0	0	0	46	36	0	0	0	0	0	0	0	0	33	45	0	0	48	87	22	0	59	0	0	0	0	17	15	0	0	0
OTU0504	0	0	0	0	0	0	0	0	0	0	0	0	0	0	0	0	0	0	0	0	0	0	17	0	0	0	0	0	0	0	33	0	0	0	0	0	0	0	0	0	0	0	0	0	0	0	0	0	0
OTU0505	0	0	0	0	0	0	0	0	0	0	0	0	0	0	0	42	0	0	0	0	0	0	0	0	0	0	0	0	0	0	0	0	0	0	0	0	0	0	0	0	40	0	200	0	50	1702	93	0	0
OTU0506	0	0	0	0	0	0	0	0	0	0	0	0	0	0	0	0	0	0	0	0	18	17	0	0	0	42	0	18	15	0	0	22	0	0	0	29	19	18	18	38	0	0	0	0	0	0	0	0	0
OTU0507	0	0	0	0	0	0	0	0	0	0	0	0	0	0	0	0	0	0	0	14	0	13	21	16	11	0	14	0	18	20	0	0	12	0	0	0	0	0	14	5	0	0	0	0	0	0	0	0	0
OTU0508	0	0	0	0	0	0	0	0	0	0	0	0	0	0	0	18	0	0	0	0	0	0	0	0	0	0	10	0	0	0	0	0	13	0	0	0	0	0	0	0	0	0	0	0	0	0	9	0	0
OTU0509	0	0	7	0	0	0	0	0	0	0	0	0	0	0	0	0	0	0	0	0	0	0	0	0	0	0	0	0	0	0	0	0	0	0	0	0	0	0	0	0	0	0	0	0	0	34	0	0	0
OTU0510	0	0	0	0	0	0	0	0	0	0	0	0	0	73	0	0	0	0	0	79	72	74	93	62	59	85	70	66	80	96	76	131	72	70	58	82	84	106	73	107	0	23	0	0	0	32	0	0	0
OTU0511	0	0	0	0	0	0	0	0	0	0	0	0	0	0	0	0	0	0	0	0	0	0	0	0	0	0	0	0	0	0	0	0	0	0	0	0	0	20	15	0	0	0	0	0	0	0	0	0	0
OTU0512	0	55	0	77	41	48	38	0	35	94	0	19	20	0	22	18	33	16	0	0	0	0	0	0	0	0	14	0	0	0	0	0	0	0	0	0	0	0	0	0	25	0	0	0	0	0	0	0	0
OTU0513	21	86	0	74	166	0	0	0	0	8	52	8	0	0	49	9	19	24	133	0	6	14	0	0	0	0	0	0	0	0	0	0	0	0	0	0	0	0	0	0	32	0	29	22	0	0	23	0	71
OTU0514	0	0	0	0	0	0	0	0	0	0	0	0	0	0	0	0	0	0	0	21	60	75	58	42	61	71	81	101	79	76	55	68	95	60	71	79	73	67	80	88	0	0	13	0	0	0	0	0	0
OTU0515	0	0	0	0	0	0	0	0	0	0	0	0	0	0	0	0	0	0	0	0	0	0	0	0	0	0	0	0	0	0	0	0	0	0	0	0	0	0	0	0	85	0	0	0	0	22	0	0	0
OTU0516	0	0	0	0	0	0	0	0	0	21	0	0	0	0	0	0	0	0	0	0	77	63	92	77	108	44	87	111	100	19	41	82	116	47	86	130	59	38	66	196	0	0	0	0	0	15	0	0	0
OTU0517	0	0	0	0	0	0	0	0	0	0	0	0	0	0	0	0	0	0	0	0	0	0	0	0	0	0	0	0	0	0	0	0	0	0	0	0	0	0	0	0	0	13	23	0	0	74	14	0	0
OTU0518	0	0	0	0	0	0	0	0	0	0	48	0	0	41	0	0	0	0	0	0	332	347	436	265	368	288	316	288	345	334	326	96	366	189	213	282	298	221	345	423	0	0	27	0	15	0	0	0	0
OTU0519	0	0	0	0	0	0	0	0	0	0	0	0	0	0	0	0	0	0	0	0	0	37	0	0	0	0	0	0	0	0	0	0	14	0	0	0	0	0	0	0	0	0	0	0	0	0	0	0	0
OTU0520	0	0	0	0	0	0	0	0	0	0	0	0	0	0	0	0	0	0	0	0	0	0	0	0	0	0	0	10	0	9	0	0	0	10	0	15	0	0	0	0	0	0	0	0	0	0	0	0	0
OTU0521	0	0	0	0	0	0	0	0	0	0	0	0	0	0	0	0	0	0	0	0	0	0	0	0	0	0	0	8	0	0	0	0	0	0	0	0	4	4	0	0	0	0	0	0	0	0	0	0	0
OTU0522	0	0	0	0	0	0	0	0	0	0	0	13	0	0	0	0	0	0	0	0	38	14	28	42	54	56	39	52	78	37	20	9	55	13	43	34	54	52	53	43	0	0	0	0	0	0	0	0	0
OTU0523	0	0	0	0	0	0	0	0	0	0	0	0	0	0	0	0	0	0	0	0	0	0	0	0	0	0	0	0	0	10	0	0	0	0	0	0	8	10	0	0	0	0	0	0	0	0	0	0	0
OTU0524	0	0	0	0	0	0	0	0	0	0	0	0	0	18	0	0	0	0	6	0	0	0	0	0	0	0	0	0	0	0	0	0	15	0	18	0	0	0	0	0	0	0	0	0	0	0	0	0	0
OTU0525	0	0	0	0	0	0	0	0	0	0	0	0	0	0	0	0	0	0	0	0	102	137	89	84	97	95	105	82	89	135	122	69	91	93	88	90	80	47	119	86	0	0	0	0	0	0	0	0	0
OTU0526	0	0	0	0	0	0	0	0	0	0	0	0	0	0	0	0	0	0	0	0	0	0	0	0	0	0	0	0	0	0	0	0	0	7	0	0	6	0	0	6	0	0	0	0	0	0	0	0	0
OTU0527	0	0	0	0	0	0	0	0	0	0	0	0	0	0	0	0	0	0	0	0	0	9	0	0	0	10	0	9	9	0	0	0	11	5	0	10	8	15	4	8	0	0	0	0	0	0	0	0	0
OTU0528	0	0	0	0	0	0	0	0	0	0	0	0	0	0	0	0	0	0	0	0	0	0	8	0	0	0	0	0	0	0	0	0	8	11	0	0	0	0	0	0	0	0	0	0	0	0	0	0	0
OTU0529	0	0	0	0	0	0	0	0	0	0	0	0	0	0	0	0	0	0	0	14	0	0	0	14	0	0	0	0	0	0	0	10	0	0	0	0	0	0	0	0	0	0	0	0	0	0	0	0	0
OTU0530	0	0	0	0	0	0	0	0	0	0	0	0	20	0	0	0	0	0	0	0	0	0	0	0	0	0	0	0	0	0	0	0	0	0	0	0	0	0	0	0	0	0	0	0	0	0	0	0	0
OTU0531	0	0	0	0	19	0	0	0	0	0	0	0	0	0	0	0	0	0	0	0	17	0	24	0	0	0	0	0	16	0	0	0	0	25	0	0	0	0	0	0	7	0	0	0	0	16	0	0	32
OTU0532	0	0	0	0	0	0	0	0	0	0	0	27	0	0	0	0	0	0	17	0	0	0	0	0	0	0	0	0	0	0	0	0	0	0	9	0	0	0	0	0	0	0	0	0	0	0	0	0	30
OTU0533	0	0	0	0	0	0	0	0	0	0	0	0	0	0	0	0	0	0	0	0	0	36	0	0	0	57	54	0	71	0	0	32	0	26	41	48	35	45	30	82	0	7	0	0	0	0	0	0	0
OTU0534	0	0	0	0	0	0	0	0	0	0	0	0	0	0	0	0	0	0	0	0	0	0	0	0	0	0	0	0	0	0	0	14	0	0	0	0	0	0	0	0	0	7	0	0	0	0	0	0	0
OTU0535	0	0	0	0	0	0	0	0	0	0	0	0	0	0	0	0	0	0	0	0	0	0	8	0	0	0	0	0	5	0	0	0	0	0	0	0	0	0	0	0	0	0	0	0	0	0	0	0	0
OTU0536	0	0	0	0	0	0	0	0	0	0	0	0	0	0	0	0	0	0	0	0	0	0	0	0	0	0	0	0	11	0	0	0	0	0	0	0	0	0	0	0	0	0	0	0	0	0	0	0	0
OTU0537	35	8	87	0	0	0	0	0	0	16	0	0	0	0	0	0	0	0	0	0	79	101	75	70	33	30	127	0	0	0	79	29	0	0	0	0	30	19	0	0	0	0	0	16	0	0	0	0	8
OTU0538	0	0	0	0	0	0	0	0	0	0	0	0	0	0	0	0	0	0	0	0	0	25	55	0	28	22	48	4	0	83	0	38	0	50	0	49	0	69	10	0	0	10	0	0	0	34	0	0	0
OTU0539	0	0	0	0	0	0	0	0	0	0	0	0	0	0	0	0	0	0	0	0	0	0	0	0	0	12	0	0	16	0	0	0	0	0	0	5	0	0	0	0	0	0	0	0	0	0	0	0	0
OTU0540	0	0	0	0	0	0	0	0	0	0	0	0	0	0	0	0	0	0	0	0	0	0	0	0	0	0	0	0	0	0	0	0	0	0	0	0	0	0	0	0	0	0	0	0	0	25	0	0	0
OTU0541	0	0	0	0	0	0	0	0	0	0	0	0	0	0	0	0	0	0	0	0	0	13	29	0	53	58	59	28	22	0	0	0	35	0	0	0	44	28	69	79	0	0	8	0	0	0	0	0	0
OTU0542	0	0	0	0	0	0	0	0	0	0	37	0	0	0	0	0	6	0	0	0	8	0	0	0	8	0	0	0	11	0	0	0	5	0	0	0	12	13	0	0	0	0	0	7	11	0	0	0	0
OTU0543	0	0	0	0	0	0	0	0	0	0	0	0	0	0	0	0	0	0	0	0	0	0	0	0	0	0	0	9	0	12	0	0	0	0	0	0	0	0	7	0	0	0	0	0	0	0	0	0	0
OTU0544	0	10	0	0	48	0	0	0	0	0	41	40	0	19	0	0	0	0	11	16	45	46	49	59	69	78	29	50	59	0	45	28	57	48	0	117	57	48	59	89	0	42	9	39	10	0	0	0	0
OTU0545	12	0	0	0	0	0	0	0	0	0	0	0	0	0	0	0	0	0	0	0	0	0	0	0	0	0	0	0	0	0	0	0	0	0	0	0	0	0	0	0	0	0	0	0	0	0	0	0	0
OTU0546	0	0	0	0	0	0	8	0	0	0	0	0	0	0	0	0	0	0	0	0	0	0	0	0	0	0	0	0	0	0	0	0	0	7	0	0	0	4	0	5	0	0	0	0	0	0	0	0	0
OTU0547	0	0	0	0	0	0	0	0	0	0	0	0	0	0	0	0	0	0	0	10	0	0	0	0	0	0	0	0	0	0	0	0	0	0	0	0	0	0	0	0	0	0	7	0	0	0	0	0	0
OTU0548	0	0	0	0	0	0	0	0	0	0	0	0	0	0	0	0	0	0	0	0	13	31	12	11	0	0	27	13	11	15	0	0	26	50	10	14	20	23	33	26	0	0	0	0	0	0	0	0	0
OTU0549	0	0	0	0	0	0	0	0	0	0	0	0	0	0	0	0	0	0	0	0	0	0	0	0	0	0	0	0	0	16	0	0	0	0	0	0	0	0	0	8	0	0	0	0	0	0	0	0	0
OTU0550	63	0	377	56	0	0	24	0	29	0	216	156	75	25	68	56	0	101	25	65	495	480	272	329	247	413	962	305	400	242	212	821	443	385	285	203	195	191	278	344	0	119	0	177	721	32	0	0	23
OTU0551	0	7	0	0	0	0	0	0	0	0	0	0	0	0	0	0	0	0	0	0	0	11	0	0	0	0	0	0	0	0	0	0	0	0	0	0	0	0	0	0	0	0	0	0	0	0	0	0	0
OTU0552	0	0	0	0	0	0	0	0	0	0	0	0	0	0	0	0	0	0	0	0	37	22	0	0	28	30	0	30	11	0	0	19	10	39	35	32	17	16	0	45	0	0	0	0	0	0	0	0	0
OTU0553	0	0	0	0	0	0	0	0	0	0	0	0	0	0	0	0	0	0	0	0	0	11	9	0	0	0	0	0	0	6	0	0	0	0	0	0	0	0	0	0	0	0	0	0	0	0	0	0	0
OTU0554	0	0	0	62	0	0	0	0	0	0	0	32	16	0	0	0	0	21	0	19	16	0	12	0	14	0	0	0	0	0	0	0	0	0	0	18	19	22	20	21	0	0	0	0	0	0	0	0	0
OTU0555	0	0	0	0	0	0	0	0	0	0	0	0	0	0	0	0	0	0	0	0	0	0	0	0	8	0	0	0	0	8	0	0	0	0	3	0	0	0	0	0	0	0	0	0	0	0	0	0	0
OTU0556	0	11	0	0	0	0	0	0	0	0	0	0	0	0	0	0	0	0	0	0	53	47	53	31	36	69	50	54	63	33	12	20	43	26	29	60	73	49	42	65	0	0	0	0	0	0	0	0	0
OTU0557	0	0	0	0	0	0	0	19	0	0	0	0	0	0	0	0	0	36	0	0	0	0	0	0	0	84	0	0	0	0	0	0	0	0	0	0	0	0	0	0	0	0	0	0	0	0	0	0	0
OTU0558	0	0	0	0	0	0	0	0	0	0	0	0	0	0	0	0	0	0	0	0	0	0	0	20	0	10	0	0	0	24	0	0	0	23	0	0	0	21	22	0	0	0	0	0	0	0	0	0	0
OTU0559	0	0	0	0	0	0	0	0	0	0	0	0	0	0	0	0	0	0	0	0	0	0	0	0	0	0	0	0	0	0	0	0	0	0	0	0	0	0	0	0	0	0	29	0	0	0	0	0	0
OTU0560	0	0	0	0	0	0	0	0	0	0	0	0	0	0	0	0	0	0	0	0	21	0	22	0	20	0	0	0	0	0	0	34	0	0	0	0	0	0	0	0	0	0	0	0	0	0	0	0	0
OTU0561	0	0	0	0	0	0	0	0	0	0	0	0	0	0	0	0	0	0	0	0	0	0	0	11	0	0	13	10	0	0	0	0	18	0	0	18	0	0	0	0	0	0	0	0	0	0	0	0	30
OTU0562	0	0	0	0	0	0	0	0	0	9	0	0	0	0	0	0	0	0	0	0	0	0	0	0	0	0	0	0	0	0	0	0	0	0	0	0	0	0	0	0	0	0	0	0	0	0	0	0	0
OTU0563	0	0	0	0	0	0	0	0	0	0	0	0	0	0	0	0	0	0	0	0	7	0	0	0	8	0	0	0	0	9	0	0	0	0	0	10	9	4	0	10	0	0	0	0	0	0	0	0	0
OTU0564	0	0	0	0	0	0	0	0	0	0	0	0	0	0	0	0	0	0	0	0	0	0	0	0	0	0	0	0	0	0	0	0	0	0	0	0	0	18	0	9	0	0	0	0	0	0	0	0	0
OTU0565	0	0	0	0	0	6	0	0	0	0	0	0	0	0	0	0	0	5	0	0	0	0	0	0	0	0	0	0	0	0	0	0	0	0	0	0	0	7	11	0	0	0	0	0	0	0	0	0	0
OTU0566	0	0	0	0	0	0	0	0	0	0	0	0	0	0	0	0	0	0	0	0	36	39	29	21	61	0	0	36	43	35	26	39	77	44	29	0	28	0	61	66	0	0	0	0	0	0	0	0	0
OTU0567	0	0	0	0	0	0	0	0	0	0	0	0	0	0	0	0	0	0	0	0	37	36	34	28	38	43	47	43	50	24	20	49	0	33	21	27	49	46	30	36	0	0	0	0	0	0	0	0	0
OTU0568	0	0	0	0	0	0	0	0	0	0	0	0	0	0	0	0	0	0	0	0	13	0	0	0	0	0	0	0	0	0	0	0	0	3	0	0	0	0	0	0	0	0	0	0	0	0	0	0	0
OTU0569	0	0	0	0	0	10	0	0	0	0	0	0	51	0	0	9	0	111	0	43	29	0	0	20	21	23	82	19	35	19	0	34	31	0	0	0	0	27	29	0	0	0	0	0	0	0	0	0	0
OTU0570	0	0	0	0	0	0	0	0	0	0	0	0	0	0	0	0	0	0	0	0	0	0	22	0	0	0	0	0	0	0	0	0	0	0	0	12	0	0	0	0	0	0	0	0	0	0	0	0	0
OTU0571	0	0	0	0	0	0	0	0	0	0	0	0	0	0	0	0	0	0	0	0	53	0	0	0	0	0	74	0	0	0	0	0	0	0	0	0	0	0	0	54	0	0	0	0	0	0	0	0	0
OTU0572	0	0	0	0	0	0	0	0	0	0	0	0	0	0	0	0	0	0	0	0	0	0	0	0	0	0	6	0	0	0	0	0	0	0	0	0	6	0	0	0	0	0	0	0	0	0	0	0	0
OTU0573	0	0	0	0	0	0	0	0	0	0	0	0	0	0	6	0	0	0	0	0	0	0	0	0	0	0	8	0	0	0	0	0	0	0	0	0	0	0	0	0	0	0	0	0	0	0	0	0	0
OTU0574	0	0	0	0	0	0	0	0	0	0	0	0	0	3	0	0	0	0	0	0	35	52	18	31	22	13	34	12	35	35	24	0	20	47	0	0	23	0	50	17	0	0	0	0	0	0	0	0	0
OTU0575	0	0	0	11	0	0	0	0	0	0	0	0	0	0	0	0	0	0	0	0	20	25	17	0	17	16	12	40	0	24	0	19	21	27	17	35	55	0	0	60	0	5	0	0	0	0	0	0	0
OTU0576	0	0	0	0	0	0	0	0	0	0	0	0	0	0	0	0	0	0	0	0	0	0	0	15	0	0	0	0	0	0	14	0	12	28	0	0	0	0	0	0	0	0	0	0	0	0	0	0	0
OTU0577	0	0	0	0	0	0	0	0	0	0	0	0	0	0	0	0	0	0	0	0	0	0	0	0	0	0	0	4	0	0	0	0	0	0	0	7	0	9	0	14	0	0	0	0	0	0	0	0	0
OTU0578	0	0	0	0	0	0	0	0	0	0	0	0	0	0	0	0	0	0	0	0	0	0	7	0	5	0	0	0	0	7	0	0	0	0	0	0	0	0	8	0	0	0	0	0	0	0	0	0	0
OTU0579	0	0	0	0	0	0	0	0	0	0	0	0	0	0	0	0	0	0	0	0	0	0	8	8	0	0	0	0	0	16	0	0	0	0	0	0	0	0	0	0	0	0	0	0	0	0	0	0	0
OTU0580	0	0	0	0	0	0	0	0	0	0	0	0	0	0	0	0	0	0	0	0	0	0	0	0	0	0	0	0	0	0	0	0	0	0	0	0	0	0	0	0	0	0	0	25	25	30	27	0	0
OTU0581	0	0	0	0	0	0	0	0	0	0	0	0	0	0	0	0	0	0	0	0	0	0	0	0	0	0	0	0	0	0	0	11	3	0	0	0	0	0	0	0	0	0	0	0	0	0	0	0	0
OTU0582	0	0	0	0	11	0	0	0	0	0	0	0	0	0	0	0	0	0	0	0	22	34	43	14	48	47	41	63	34	23	0	46	41	26	30	43	39	35	40	37	0	0	0	0	0	0	0	0	0
OTU0583	0	0	0	0	0	0	0	0	0	48	0	0	0	63	0	0	0	0	0	0	57	0	0	50	0	37	85	43	106	103	0	41	0	32	132	37	166	66	55	135	0	0	0	0	0	0	0	0	0
OTU0584	0	0	2	0	8	0	0	0	0	0	0	0	0	0	0	0	0	0	0	0	0	0	0	0	0	0	0	0	0	0	0	0	0	0	0	0	0	2	0	0	0	0	0	0	0	0	0	0	0
OTU0585	0	0	0	11	0	0	0	0	0	0	0	0	0	0	0	0	0	0	0	0	0	0	0	0	0	0	12	0	0	0	0	0	0	0	0	0	0	0	0	0	0	0	0	0	0	0	0	0	0
OTU0586	0	0	0	56	55	0	1	0	0	0	0	0	0	0	0	0	21	0	0	0	0	0	0	0	0	0	0	0	0	0	0	0	0	0	0	19	0	0	0	22	0	0	48	0	0	78	2	0	0
OTU0587	0	10	22	11	18	16	0	6	14	21	0	0	0	0	0	0	0	0	0	0	0	0	0	0	0	0	0	0	0	0	0	0	0	0	0	0	0	0	0	0	13	0	0	0	0	0	0	0	17
OTU0588	0	0	0	0	0	0	0	0	0	0	0	0	0	0	0	0	0	0	0	0	0	0	0	0	0	0	0	0	0	0	0	0	0	0	0	0	0	0	0	0	0	0	0	0	0	0	0	0	0
OTU0589	0	0	0	0	0	0	0	0	0	0	0	0	0	0	0	0	0	0	0	0	0	0	0	0	0	0	0	0	0	0	0	0	35	0	0	0	0	0	32	0	0	0	0	0	0	0	0	0	0
OTU0590	0	0	0	0	0	0	0	0	0	0	0	0	0	0	0	0	0	0	0	0	0	0	0	0	0	0	0	0	0	0	0	0	0	0	0	10	0	4	0	0	0	0	0	0	0	0	0	0	0
OTU0591	0	0	0	0	0	0	0	0	0	0	0	0	0	0	0	0	0	0	0	0	0	0	0	0	0	0	0	0	0	0	0	0	0	0	0	0	0	0	0	0	0	0	34	0	0	68	0	0	0
OTU0592	0	0	0	0	0	0	0	0	0	0	0	0	0	0	0	0	0	0	0	0	5	0	0	0	0	0	0	0	0	0	0	0	0	15	0	0	0	0	74	0	0	0	0	0	0	0	0	0	0
OTU0593	0	0	0	0	0	0	0	0	0	0	0	0	0	0	0	0	0	0	0	0	0	0	0	0	0	0	0	0	0	0	0	0	0	0	0	0	0	0	0	0	0	0	0	0	0	0	0	0	0
OTU0594	0	0	0	0	0	0	0	0	0	0	0	0	0	0	0	0	0	0	0	0	0	0	0	0	0	0	0	10	0	0	0	0	0	0	0	0	0	5	0	7	0	0	0	0	0	0	0	0	0
OTU0595	0	0	0	6	0	7	0	0	7	0	0	0	0	0	0	0	0	0	0	0	0	0	0	0	0	0	0	0	0	0	0	0	0	0	0	0	0	0	0	0	0	0	0	0	0	0	0	0	0
OTU0596	0	0	0	0	0	0	0	0	0	0	0	0	0	0	0	0	0	0	0	0	24	34	0	0	21	22	0	0	29	31	0	0	28	0	0	33	21	35	46	46	0	0	0	0	12	0	0	0	0
OTU0597	0	0	0	0	0	0	0	0	0	0	14	0	0	0	0	0	0	0	0	0	0	18	0	18	25	18	17	0	0	20	0	0	23	0	0	0	17	22	0	0	0	0	0	0	0	0	0	0	0
OTU0598	0	0	0	0	0	0	0	0	0	0	0	0	0	0	0	0	0	0	0	0	0	0	0	0	0	0	0	7	0	0	0	0	0	0	0	0	0	0	0	0	0	0	0	0	0	0	0	0	0
OTU0599	0	0	0	0	0	0	0	0	0	0	0	0	0	0	0	0	0	0	0	0	7	0	0	0	0	0	0	0	0	0	0	0	0	0	0	0	0	0	0	0	0	0	15	0	0	0	0	0	0
OTU0600	0	0	0	0	0	0	0	0	0	0	0	0	0	0	0	0	0	0	0	0	0	0	0	0	0	0	0	0	0	13	0	0	5	0	4	0	0	6	0	0	0	0	11	0	0	49	0	0	0
OTU0601	0	0	0	0	0	0	0	0	0	0	0	0	0	0	0	0	0	0	0	0	30	64	0	39	28	58	43	56	0	50	32	23	56	0	33	55	0	51	30	55	0	0	0	0	0	0	0	0	0
OTU0602	0	0	0	0	0	0	0	0	0	0	0	0	0	0	0	0	0	0	0	0	40	80	66	42	51	62	87	76	75	77	65	77	53	61	45	67	101	121	53	69	0	0	0	0	0	0	0	0	0
OTU0603	0	0	0	0	0	0	0	0	0	8	0	0	0	0	0	0	0	0	0	0	37	77	36	0	65	0	42	58	0	0	0	0	29	81	72	0	17	0	41	90	0	0	0	0	0	0	0	0	0
OTU0604	0	0	0	0	0	0	0	0	0	0	0	0	0	0	0	0	0	0	0	0	0	0	0	0	0	0	17	13	0	0	0	0	0	0	0	17	0	20	20	0	0	0	0	0	0	0	0	0	0
OTU0605	0	0	0	0	0	0	0	0	0	0	0	0	0	0	0	0	0	0	0	0	0	0	0	0	0	0	0	0	0	0	0	0	0	0	0	0	0	0	0	15	0	0	0	0	0	0	0	0	37
OTU0606	0	0	0	0	0	0	0	0	0	0	0	0	0	0	0	0	0	0	0	0	0	10	16	0	0	0	14	0	0	14	0	0	0	0	0	0	11	9	0	13	0	0	0	0	0	0	0	0	0
OTU0607	0	0	0	0	0	0	0	0	0	0	0	0	0	0	0	0	0	0	0	0	0	0	0	0	4	0	0	0	0	0	0	0	0	0	0	0	0	0	0	0	0	0	0	0	0	0	0	0	0
OTU0608	0	0	0	0	22	0	0	18	0	0	58	0	0	0	0	0	0	0	0	33	0	104	39	0	10	0	0	0	0	59	0	0	0	16	0	0	33	0	0	0	23	0	47	58	0	0	0	0	0
OTU0609	0	0	0	0	0	0	0	0	0	0	0	0	0	0	0	0	0	0	0	0	0	0	0	0	0	21	0	0	0	0	0	0	0	0	0	42	17	0	0	34	0	0	0	0	0	0	0	0	0
OTU0610	0	0	0	0	0	0	0	0	0	0	0	0	0	0	0	0	0	0	0	0	0	0	17	0	45	0	0	26	0	0	0	31	26	0	30	0	31	0	17	33	0	0	0	0	0	0	0	0	0
OTU0611	0	0	0	0	0	0	0	0	0	0	0	0	0	0	0	0	0	0	0	0	32	57	22	41	36	43	45	49	59	31	0	21	36	0	43	33	52	38	45	49	0	0	0	0	0	0	0	0	0
OTU0612	0	0	0	0	0	0	0	0	0	0	0	0	0	0	0	0	0	0	0	0	0	0	0	0	0	0	0	0	0	0	0	0	0	0	0	0	0	42	0	0	0	0	0	0	0	0	0	0	17
OTU0613	0	0	0	0	0	0	0	0	0	0	0	0	0	0	0	0	0	0	0	0	0	0	0	0	0	0	0	0	0	0	0	0	0	0	0	0	0	0	0	0	0	4	0	31	0	0	0	0	0
OTU0614	0	0	0	0	0	0	0	0	0	0	0	0	0	0	0	0	0	0	0	0	0	5	0	0	0	0	0	0	0	0	0	0	0	0	0	0	0	0	0	0	0	0	0	0	0	0	0	0	0
OTU0615	0	0	0	14	0	0	0	0	0	0	0	0	0	0	0	0	0	0	0	0	9	52	48	45	0	0	13	0	0	0	0	0	0	20	0	0	0	0	0	10	0	0	10	0	0	0	0	0	0
OTU0616	41	121	28	86	59	497	22	36	0	57	23	0	0	0	0	0	0	0	0	0	0	0	0	0	0	0	0	0	0	0	0	0	0	0	0	0	0	0	0	0	30	0	0	0	0	9	48	47	187
OTU0617	0	0	0	0	0	0	0	0	0	0	85	34	0	0	0	0	7	0	0	0	0	56	0	0	0	0	33	20	0	0	0	0	0	0	0	0	0	0	0	0	0	92	0	0	0	0	0	0	0
OTU0618	0	0	0	0	0	0	0	0	0	0	0	0	0	0	0	0	0	0	0	0	0	0	0	0	0	0	0	0	0	0	0	0	0	0	0	0	0	0	15	11	0	0	0	0	0	0	0	0	0
OTU0619	0	0	0	0	0	0	0	0	0	0	0	0	0	0	0	0	0	0	0	0	0	0	0	0	0	0	0	0	0	0	0	0	0	0	0	0	0	0	0	0	0	0	43	0	0	51	0	0	0
OTU0620	0	0	0	0	0	0	0	0	0	0	0	0	0	0	0	0	0	0	0	0	0	0	0	0	0	0	0	0	0	0	10	24	26	18	0	0	13	0	11	43	0	0	0	0	0	0	0	0	0
OTU0621	0	0	0	0	0	0	0	0	0	0	0	0	0	0	0	0	0	0	0	0	0	0	0	0	0	0	0	0	0	0	0	0	0	0	7	0	0	0	0	11	0	0	0	0	0	0	0	0	0
OTU0622	0	0	0	0	0	0	0	0	0	0	0	0	0	0	0	0	0	0	0	0	6	0	0	0	0	9	0	0	0	0	0	0	5	0	0	0	0	0	0	0	0	0	0	0	0	0	0	0	0
OTU0623	0	0	0	0	0	0	0	0	0	0	0	0	0	0	0	0	0	0	0	0	0	0	0	0	0	0	31	17	0	0	0	0	0	0	0	0	32	0	0	0	0	0	0	0	0	0	0	0	0
OTU0624	0	0	0	0	0	0	0	0	0	0	0	0	0	0	0	0	0	0	0	0	53	0	35	74	60	25	0	0	0	88	0	0	0	139	44	14	26	61	76	0	0	0	68	0	0	0	0	0	0
OTU0625	0	0	0	0	0	0	0	0	0	0	0	0	0	0	0	0	0	0	0	0	0	0	0	0	0	0	0	0	9	0	0	0	0	0	0	0	0	0	0	0	0	0	0	0	0	64	0	0	0
OTU0626	0	0	0	0	0	0	0	0	0	0	0	0	0	0	0	0	0	0	0	0	17	0	0	0	0	0	0	0	13	0	0	0	0	0	0	10	10	0	0	0	0	0	0	0	0	0	0	0	0
OTU0627	0	0	0	0	0	0	0	0	0	0	0	0	0	0	0	0	0	0	0	0	44	101	66	89	68	88	65	37	78	0	0	67	54	27	0	0	58	75	61	77	0	0	0	0	0	0	0	0	0
OTU0628	0	0	0	0	22	0	0	15	41	0	114	17	0	0	15	19	0	0	0	0	0	0	0	0	0	0	0	0	0	0	0	0	0	0	0	0	0	14	12	0	0	13	0	63	58	0	0	0	0
OTU0629	0	6	0	0	0	0	0	0	7	0	0	0	0	0	0	0	0	0	0	0	0	0	7	0	0	0	0	0	0	0	0	0	0	0	0	0	0	0	0	0	0	0	57	0	0	0	0	0	0
OTU0630	0	0	0	0	0	0	0	0	0	0	0	0	0	0	0	0	0	0	0	0	0	0	0	0	0	0	0	0	0	0	0	0	16	0	0	0	0	0	0	0	0	0	0	0	0	0	0	0	0
OTU0631	0	0	0	0	0	0	0	0	0	0	0	0	0	0	0	0	0	0	0	10	0	0	0	0	0	0	0	0	0	0	0	0	12	8	0	0	0	0	0	0	0	0	0	0	0	0	0	0	0
OTU0632	0	0	0	0	0	0	0	0	0	0	0	0	0	0	0	0	0	0	0	0	0	0	0	0	0	0	24	0	0	0	0	0	0	0	0	0	0	0	0	0	0	47	0	0	0	0	0	0	0
OTU0633	0	0	0	0	0	0	0	0	0	0	0	0	0	0	0	0	0	0	0	0	0	0	12	0	14	0	0	0	22	0	0	0	23	16	0	17	0	20	17	26	0	0	0	0	0	0	0	0	0
OTU0634	0	0	0	0	0	0	0	0	0	0	0	0	0	0	68	18	0	0	0	0	0	0	0	0	0	0	0	0	0	0	0	0	0	0	0	0	0	0	0	0	0	0	35	0	0	0	28	0	0
OTU0635	0	0	0	0	0	0	0	0	0	0	0	0	33	0	0	0	0	0	0	0	0	0	0	0	0	0	0	0	0	0	0	0	0	0	0	0	0	0	0	0	0	0	0	0	0	0	0	0	0
OTU0636	0	0	0	12	0	0	0	0	0	0	0	0	0	0	0	0	0	0	0	0	0	7	0	0	0	0	0	0	0	0	0	0	0	0	0	0	0	0	0	4	0	0	0	0	0	8	0	0	0
OTU0637	0	0	0	0	0	0	0	0	0	0	0	0	0	0	0	0	0	0	0	0	0	0	16	0	0	0	19	0	0	16	0	0	0	0	0	0	0	0	0	0	0	0	0	0	0	0	0	0	0
OTU0638	0	0	0	0	11	0	0	0	0	0	0	54	0	53	0	0	0	0	0	125	155	198	164	124	160	144	194	188	175	144	84	189	152	113	123	158	147	209	198	283	0	0	0	0	0	0	0	0	0
OTU0639	0	0	0	0	0	0	0	0	0	0	0	0	0	0	0	0	0	0	0	0	0	0	0	0	3	0	0	0	0	0	0	0	0	0	0	0	0	0	0	0	0	0	0	0	0	0	0	0	0
OTU0640	61	0	0	0	0	0	35	0	75	68	0	29	54	0	0	0	0	0	76	0	34	31	42	25	0	38	31	0	42	1	0	34	0	0	0	0	0	38	0	54	0	33	0	47	52	0	0	0	95
OTU0641	39	0	21	0	0	0	0	0	0	0	0	0	0	0	0	0	0	0	0	25	107	0	0	45	50	0	41	0	0	22	0	0	33	0	0	0	0	0	0	0	0	0	0	58	0	0	0	0	0
OTU0642	0	0	0	0	0	0	0	0	0	0	0	0	0	0	0	0	0	0	0	0	0	0	0	0	12	0	0	0	0	0	0	0	0	0	0	0	0	0	0	0	0	0	0	0	0	0	0	0	0
OTU0643	0	0	0	0	0	0	0	0	0	0	0	0	0	0	0	0	0	0	0	0	54	70	51	85	79	82	18	66	91	133	67	0	101	100	57	54	51	41	34	95	0	0	0	0	0	0	0	0	0
OTU0644	0	0	0	0	0	11	0	0	0	0	0	0	0	0	0	0	0	0	0	0	26	54	18	40	35	28	49	41	22	52	35	52	44	41	51	0	40	37	84	98	0	0	0	0	0	0	0	0	0
OTU0645	0	0	0	0	0	0	0	0	0	0	0	0	0	0	0	0	0	0	0	0	0	0	0	0	0	0	0	0	0	0	0	0	0	0	0	0	0	18	0	0	0	8	0	0	0	0	0	0	0
OTU0646	0	0	0	0	0	0	0	0	0	0	0	0	0	0	0	0	0	0	0	0	0	0	0	0	0	0	0	0	0	0	0	0	0	0	0	13	6	0	0	11	0	0	0	0	0	0	0	0	0
OTU0647	0	0	0	0	0	0	0	0	0	0	0	0	0	0	0	0	0	0	0	0	23	50	38	0	20	43	0	75	22	46	60	0	118	124	0	24	131	110	57	111	0	0	76	0	19	67	0	0	0
OTU0648	0	0	0	0	0	0	0	0	0	0	0	0	0	0	0	0	0	0	0	0	26	41	22	34	36	29	11	0	37	0	0	34	0	29	0	16	0	24	0	12	0	0	0	0	0	0	0	0	0
OTU0649	0	0	0	0	0	0	0	0	0	0	0	0	0	0	0	0	0	0	11	0	0	0	0	0	0	0	0	0	0	0	0	0	0	0	0	0	0	0	0	0	0	0	0	0	0	0	7	0	0
OTU0650	0	0	0	0	0	0	0	0	0	0	0	0	0	0	0	0	0	0	0	0	0	0	0	0	0	0	15	0	0	0	0	0	0	0	0	0	0	14	0	0	0	0	0	0	0	0	0	0	0
OTU0651	0	0	0	0	0	0	0	0	0	0	0	0	0	0	0	0	0	0	0	0	0	0	0	0	0	5	0	9	0	0	0	0	0	0	12	0	0	0	0	0	0	0	0	0	0	0	0	0	0
OTU0652	0	0	0	0	0	0	15	0	0	0	35	0	0	50	0	0	0	0	18	72	0	0	0	0	0	0	0	0	0	0	0	18	0	0	0	0	33	0	39	0	0	17	0	0	19	0	0	0	0
OTU0653	0	0	0	0	0	0	0	0	0	0	0	0	0	0	0	0	0	0	0	0	0	0	0	0	0	4	8	0	0	0	4	0	0	0	0	0	0	0	9	11	0	0	0	0	0	0	0	0	0
OTU0654	0	0	0	0	0	0	0	0	0	0	0	0	0	0	0	0	0	0	0	0	0	0	0	0	0	0	0	0	0	0	0	10	8	0	0	0	0	16	0	11	0	0	0	0	0	0	0	0	0
OTU0655	0	0	0	0	0	0	0	0	0	0	0	0	0	0	0	0	0	8	10	0	0	0	0	0	0	0	0	0	0	0	0	14	11	0	0	0	0	0	0	0	0	0	0	0	0	0	0	0	0
OTU0656	9	0	0	0	0	0	0	0	0	0	0	0	0	0	0	0	0	0	0	0	0	0	0	0	0	0	0	0	0	0	0	0	0	0	0	0	0	0	0	0	0	0	0	0	0	0	6	0	0
OTU0657	0	0	0	0	0	0	0	0	0	0	0	0	0	0	0	0	0	0	0	0	44	74	30	22	31	42	31	25	47	45	0	28	37	29	22	29	43	36	38	35	0	5	0	10	0	0	0	0	0
OTU0658	0	0	0	0	0	0	0	0	0	0	0	0	0	0	0	0	0	0	0	0	59	0	53	22	33	33	29	0	39	28	20	18	24	44	0	71	0	0	0	84	0	0	94	0	0	65	0	0	0
OTU0659	0	0	0	0	0	0	0	0	0	0	0	0	0	0	0	0	0	0	0	0	18	0	0	0	38	0	0	0	0	0	0	0	31	0	0	0	0	0	0	0	0	0	0	0	0	0	0	0	0
OTU0660	0	0	0	0	0	0	0	0	2	0	0	0	0	0	0	0	0	0	0	0	0	0	0	0	0	0	0	0	0	0	0	0	0	4	0	0	0	0	0	0	3	0	0	0	0	0	2	0	0
OTU0661	0	0	0	0	0	0	0	0	0	0	0	0	0	0	0	0	0	0	0	0	0	0	0	0	0	0	0	0	6	0	0	0	0	5	0	0	0	0	7	0	0	0	0	0	0	0	0	0	0
OTU0662	0	0	0	0	0	0	0	0	0	0	0	0	0	0	0	0	0	0	0	0	20	0	0	29	0	22	24	0	16	0	17	0	33	0	0	32	19	22	14	34	0	0	0	0	0	0	0	0	0
OTU0663	0	0	0	0	0	0	0	0	0	0	9	0	0	30	0	0	0	0	0	19	50	32	54	0	43	25	57	26	49	51	38	66	34	59	31	37	38	43	45	75	0	0	0	0	0	0	0	0	0
OTU0664	0	0	0	0	0	0	0	0	0	0	0	0	0	0	0	0	0	0	0	0	0	0	0	0	0	0	0	0	0	0	0	0	0	0	0	0	0	0	0	0	0	0	0	0	0	0	0	0	0
OTU0665	0	0	0	0	0	0	0	0	0	0	0	0	0	14	0	0	0	0	0	0	23	18	19	18	26	19	25	17	34	26	0	26	27	22	35	36	23	46	27	55	0	0	27	0	0	41	0	0	0
OTU0666	0	0	0	0	0	0	0	0	0	0	27	0	0	0	0	0	0	0	0	0	35	44	0	25	0	0	42	12	20	21	33	25	0	30	0	14	25	15	38	27	0	0	0	0	0	0	0	0	0
OTU0667	0	0	0	0	0	0	0	0	0	0	0	0	0	0	0	0	0	0	0	0	0	12	25	13	0	0	0	0	0	36	0	0	0	27	0	13	0	29	0	0	0	0	11	0	0	0	0	0	0
OTU0668	0	0	0	0	0	0	0	0	26	0	0	0	0	0	0	0	0	0	0	0	0	0	0	0	0	0	0	0	0	0	0	0	0	0	0	0	0	0	0	0	0	0	0	0	0	0	0	0	0
OTU0669	0	0	0	0	0	0	0	0	0	0	0	0	0	8	0	0	0	0	0	0	0	17	0	0	0	14	15	0	0	0	0	0	0	0	0	0	0	23	0	0	0	0	0	0	0	0	0	0	0
OTU0670	0	0	0	0	0	0	0	0	0	0	0	0	0	0	0	0	0	0	0	0	0	0	2	0	0	0	0	0	4	0	0	0	6	0	0	0	0	0	2	0	0	0	0	0	0	0	0	0	0
OTU0671	0	0	0	0	0	0	0	0	0	0	0	0	0	0	0	0	0	0	0	0	67	44	37	0	26	33	13	53	34	37	38	35	37	0	23	20	0	32	26	0	0	0	0	0	0	0	0	0	0
OTU0672	0	0	0	0	0	0	0	0	0	0	0	0	0	0	0	0	0	0	0	0	0	0	0	0	0	8	0	15	14	0	0	0	12	0	0	0	0	17	0	6	0	0	0	0	0	0	0	0	0
OTU0673	0	0	0	0	0	0	0	137	0	0	0	0	0	0	0	0	0	0	0	0	0	20	0	0	0	0	27	10	49	0	0	89	0	0	0	0	0	0	6	0	0	56	142	0	0	41	0	0	0
OTU0674	0	0	0	0	0	0	0	0	0	0	0	0	0	0	0	0	0	0	0	0	0	0	0	0	0	0	0	0	0	0	0	0	10	0	0	0	0	0	0	0	0	0	0	0	0	0	0	0	0
OTU0675	0	31	0	8	0	0	0	0	0	0	10	0	0	0	0	0	0	0	72	0	0	0	0	0	0	0	0	0	0	0	0	0	0	0	0	0	0	0	0	0	0	0	0	0	0	0	0	0	0
OTU0676	0	0	0	0	0	0	0	0	0	0	0	0	0	0	0	0	0	0	0	0	96	140	112	106	95	72	159	118	94	125	89	88	126	118	32	80	110	150	101	131	0	28	0	0	0	0	0	0	0
OTU0677	0	0	0	0	0	0	0	0	0	0	0	0	26	0	0	0	0	0	0	0	0	0	0	0	0	0	0	0	0	24	0	0	0	0	0	0	0	0	0	0	0	0	0	0	0	0	0	0	0
OTU0678	0	0	0	0	0	0	0	0	0	0	0	0	0	0	0	0	0	0	0	0	0	0	0	0	0	0	8	0	0	0	0	0	0	0	0	0	0	0	19	0	0	0	0	0	0	0	0	0	0
OTU0679	0	0	0	0	0	0	0	0	0	13	0	0	9	0	0	0	0	0	0	0	0	0	0	0	0	0	0	0	0	0	0	0	0	0	0	0	0	0	0	0	0	0	0	0	0	0	0	0	0
OTU0680	0	0	0	0	0	0	0	0	0	0	0	0	0	0	0	0	0	0	0	0	17	12	0	0	11	25	23	11	32	23	0	17	24	20	0	18	21	35	20	30	0	0	0	0	0	0	0	0	0
OTU0681	0	0	0	0	0	0	0	0	0	0	0	0	0	0	0	0	0	0	0	0	0	0	0	0	0	0	0	0	0	0	0	0	0	0	0	0	0	0	0	0	0	0	0	0	0	46	0	0	0
OTU0682	0	0	0	0	22	0	0	0	0	9	0	0	0	0	0	0	0	0	0	0	0	0	0	0	0	0	9	0	0	0	0	0	0	0	0	0	0	0	0	0	0	0	0	0	0	0	0	0	0
OTU0683	0	0	0	0	0	0	0	0	0	0	0	0	0	0	0	0	0	0	0	0	40	41	0	15	41	0	27	21	31	18	22	0	30	0	0	0	0	0	0	27	0	0	0	0	0	0	0	0	0
OTU0684	0	0	0	0	0	0	0	0	0	0	0	0	0	0	0	0	0	0	0	0	0	7	0	0	0	0	0	0	0	0	0	0	0	0	0	0	0	0	0	0	0	0	0	0	0	0	0	0	0
OTU0685	0	0	0	0	0	0	0	0	0	0	0	0	0	0	0	0	0	0	0	0	0	0	0	0	0	0	0	0	0	0	0	0	0	0	0	0	0	0	0	3	0	0	0	14	0	0	0	0	0
OTU0686	0	0	0	0	0	0	0	0	0	0	0	0	0	0	0	0	0	0	0	0	0	0	0	0	0	0	0	0	0	12	6	0	7	15	0	0	10	19	0	0	0	0	0	0	0	0	0	0	0
OTU0687	0	0	0	0	3	0	0	0	0	0	0	0	0	0	0	0	0	0	0	0	0	0	0	0	0	0	0	0	0	0	0	0	0	0	0	0	0	0	0	0	0	0	0	0	0	0	0	0	0
OTU0688	0	0	0	0	22	0	0	0	0	0	0	0	0	0	17	0	0	0	0	0	0	39	0	115	50	0	46	34	29	67	34	9	24	0	0	25	0	20	37	34	0	49	42	0	0	0	0	0	0
OTU0689	0	0	0	0	0	0	0	0	0	0	0	95	0	0	0	0	0	0	0	0	0	0	0	0	0	0	0	9	0	0	0	0	0	0	0	0	0	0	0	0	0	0	0	0	0	0	0	0	0
OTU0690	0	0	0	0	0	0	0	0	0	0	0	0	0	0	0	0	0	0	0	0	9	0	6	6	7	11	0	0	7	0	0	0	0	0	5	6	0	0	8	2	0	0	0	0	0	0	0	0	0
OTU0691	0	0	0	0	0	0	0	0	0	0	0	0	0	0	0	0	0	0	0	0	0	0	0	0	0	0	0	16	0	0	0	0	19	4	0	0	0	0	10	0	0	0	0	0	0	0	0	0	0
OTU0692	0	0	0	0	0	0	0	0	0	0	0	0	0	0	0	0	0	0	0	0	0	11	9	0	14	10	0	6	9	8	0	0	0	5	0	0	7	0	0	0	0	0	0	0	0	0	0	0	0
OTU0693	0	0	0	0	0	0	0	0	0	0	0	0	0	0	0	0	0	0	0	0	0	0	0	0	0	0	0	0	0	0	0	0	0	0	0	0	0	0	0	0	0	0	0	0	0	0	0	0	0
OTU0694	0	0	0	0	0	0	0	0	0	0	0	0	0	0	0	0	0	0	0	0	0	0	0	0	0	0	0	0	0	0	0	0	0	0	0	0	0	0	0	0	0	0	0	0	0	12	0	0	0
OTU0695	0	0	0	0	0	0	0	0	0	0	0	0	0	0	0	0	0	0	0	0	0	19	0	0	0	20	0	0	10	0	0	0	0	0	0	0	0	0	0	0	0	0	0	0	0	0	0	0	0
OTU0696	0	0	0	0	0	0	0	0	0	0	0	0	0	0	0	0	0	0	0	0	0	0	0	0	0	0	0	0	0	0	0	0	0	0	0	0	13	0	0	0	0	0	0	9	0	0	0	0	0
OTU0697	0	0	0	0	0	0	0	0	22	0	0	0	0	0	0	0	0	0	0	0	0	0	0	0	0	0	0	13	31	0	0	0	0	0	0	0	0	0	0	0	0	0	0	0	0	0	0	0	0
OTU0698	0	0	0	0	0	0	0	0	0	0	0	0	0	0	0	0	0	0	0	0	0	0	0	0	0	0	0	0	0	0	0	0	0	0	0	0	0	0	0	0	0	0	0	3	0	0	0	0	0
OTU0699	0	0	0	0	0	0	0	0	0	0	0	0	0	0	0	0	0	0	0	0	0	0	0	0	0	0	0	0	0	0	0	0	0	0	0	0	0	0	0	0	0	0	0	0	0	0	0	0	0
OTU0700	0	0	0	0	0	0	0	0	5	0	0	0	0	0	0	0	0	0	0	0	0	0	16	0	0	0	0	0	18	0	0	0	0	0	0	0	0	0	0	0	0	0	0	0	0	0	0	0	0
OTU0701	0	0	0	53	0	16	0	0	0	34	0	0	0	0	0	22	0	24	38	45	14	23	21	16	24	28	0	30	24	26	0	26	22	0	15	19	10	37	27	24	17	0	36	0	0	0	0	0	0
OTU0702	0	0	0	0	0	0	0	0	0	0	0	0	0	43	0	0	0	0	0	0	0	0	0	0	0	31	0	0	0	0	0	0	22	0	0	0	0	0	0	24	0	0	0	0	0	0	0	0	0
OTU0703	0	0	0	0	0	0	0	0	0	0	0	0	0	0	0	0	0	0	0	0	0	0	0	0	0	0	0	0	0	0	0	0	0	0	0	0	0	0	0	0	0	0	0	0	4	0	0	0	0
OTU0704	0	0	0	0	0	0	0	0	0	0	0	0	0	0	0	0	0	0	0	0	0	0	0	0	0	0	0	0	0	0	0	0	0	0	0	0	0	0	0	0	0	0	0	0	0	0	0	0	0
OTU0705	0	0	0	0	0	0	0	0	0	0	0	0	0	0	0	0	0	0	0	0	19	0	0	0	0	22	30	0	0	33	18	0	18	27	19	19	0	38	15	43	0	0	0	0	0	0	0	0	0
OTU0706	0	0	0	0	0	0	0	0	0	0	0	0	0	0	0	0	0	0	0	0	0	9	0	0	0	0	0	0	0	0	0	0	0	0	0	0	0	0	0	0	0	0	0	0	0	0	2	0	0
OTU0707	5	0	0	0	0	0	0	0	0	0	0	0	0	0	0	0	0	0	0	0	0	0	0	0	0	0	0	0	0	0	0	0	0	0	0	0	0	0	0	0	0	0	0	0	0	0	0	0	0
OTU0708	0	0	0	0	0	0	0	0	0	0	0	0	0	0	0	0	0	0	0	0	12	0	13	0	0	16	0	0	0	20	10	14	14	0	0	22	13	27	0	15	0	0	0	0	0	0	0	0	0
OTU0709	0	0	0	0	0	0	0	0	0	0	0	0	0	0	0	0	0	0	0	0	23	15	16	0	26	20	16	0	39	0	0	18	22	0	0	0	39	0	25	31	0	0	0	0	0	0	0	0	0
OTU0710	0	0	0	0	0	0	0	0	0	0	0	62	0	50	0	0	0	0	0	0	0	0	24	0	47	0	0	0	0	0	0	48	0	0	0	35	0	48	0	109	0	0	37	0	0	35	0	0	0
OTU0711	0	0	0	0	0	0	0	0	0	0	0	0	0	0	0	0	0	0	0	0	0	0	0	0	0	0	0	0	0	0	0	0	0	0	0	0	35	0	20	0	0	0	0	0	0	0	0	0	0
OTU0712	0	0	0	0	0	17	0	0	50	0	0	41	0	0	0	0	0	25	0	0	9	0	0	0	0	0	0	0	0	0	0	0	0	0	0	0	0	0	11	0	0	0	0	0	0	0	0	0	0
OTU0713	0	0	0	0	22	0	0	0	0	0	0	0	0	0	0	0	0	31	0	0	33	58	36	0	0	42	51	39	0	56	29	36	0	0	25	0	0	43	60	76	0	0	0	26	0	113	0	0	0
OTU0714	0	0	0	0	0	0	0	0	0	0	0	0	0	0	0	0	0	0	0	0	0	0	0	0	0	0	0	9	0	0	0	0	0	0	0	0	3	0	0	14	0	0	0	0	0	0	0	0	0
OTU0715	0	9	0	0	0	0	0	0	0	0	0	0	0	0	0	0	0	0	0	0	0	0	0	0	0	0	0	0	0	0	0	0	0	0	0	0	0	0	0	0	0	0	0	0	0	0	0	0	0
OTU0716	0	0	0	0	0	0	0	0	0	0	0	0	0	0	0	0	0	0	0	0	19	12	29	18	14	33	16	16	28	19	0	25	20	20	11	31	0	24	11	28	0	0	0	0	0	0	0	0	0
OTU0717	0	0	0	0	0	0	0	0	0	0	0	0	0	0	0	0	0	0	0	0	0	0	0	0	0	0	0	0	0	0	0	0	0	0	0	0	0	0	0	0	0	0	0	0	0	0	0	0	0
OTU0718	84	63	30	0	56	110	0	79	123	140	0	0	25	57	24	51	0	25	39	0	24	41	0	0	20	19	23	0	0	0	0	0	0	0	0	0	0	0	0	0	0	0	0	0	18	0	0	0	0
OTU0719	0	0	0	0	0	0	0	0	0	0	0	0	0	0	0	0	0	0	0	0	0	38	0	12	0	0	0	0	0	0	0	0	0	0	9	0	0	0	0	0	0	0	26	0	0	0	0	0	0
OTU0720	0	0	0	0	0	0	0	0	0	0	0	0	0	0	0	0	0	0	0	0	0	0	0	0	0	0	0	0	0	0	0	0	0	0	0	0	0	0	0	0	0	0	5	0	0	0	0	0	0
OTU0721	0	0	0	0	0	19	0	0	0	0	0	0	0	0	0	0	0	0	0	0	0	0	0	0	0	0	28	0	0	0	0	0	0	0	0	13	0	21	0	31	0	0	16	0	0	0	0	0	0
OTU0722	0	0	0	0	0	0	0	0	0	0	0	0	0	0	0	0	0	0	0	0	26	33	12	0	0	0	15	18	27	33	15	8	0	7	10	11	0	34	23	0	0	0	0	0	0	0	0	0	0
OTU0723	0	0	0	0	0	0	0	0	0	0	0	0	0	0	0	0	0	0	0	0	0	0	0	0	0	0	0	0	0	0	0	0	0	0	0	0	8	0	0	0	0	0	0	0	0	0	0	0	15
OTU0724	0	0	0	0	0	0	0	0	0	0	0	0	0	0	0	0	0	0	0	0	0	0	0	0	0	0	9	11	0	0	0	0	0	0	0	0	0	0	0	6	0	0	0	0	0	0	0	0	0
OTU0725	0	0	0	0	0	0	0	0	0	0	0	0	0	0	0	0	0	0	0	0	0	0	0	15	0	23	0	0	10	0	0	0	0	0	9	0	0	10	0	0	0	0	0	0	0	0	0	0	0
OTU0726	0	0	0	0	0	0	0	0	0	0	0	0	0	0	0	0	0	0	0	12	0	0	0	10	0	0	0	0	0	0	0	0	0	0	0	9	0	6	0	0	0	0	0	0	0	0	0	0	0
OTU0727	0	0	0	0	0	0	0	0	0	0	0	0	0	0	0	0	0	0	0	0	0	0	0	0	0	0	5	0	0	3	10	6	0	3	0	0	0	0	13	0	0	0	0	0	0	0	0	0	0
OTU0728	0	0	0	0	0	0	0	0	0	0	0	0	0	0	0	0	0	0	0	0	0	0	0	0	0	0	0	0	0	0	0	0	0	0	0	0	0	0	0	0	32	0	78	0	0	43	0	0	0
OTU0729	0	0	0	0	0	0	0	0	0	0	0	0	0	0	0	0	0	0	0	0	0	0	0	0	0	0	0	0	0	0	0	0	0	0	0	0	0	0	4	9	0	0	0	0	0	0	0	0	0
OTU0730	10	26	0	34	69	36	0	10	10	33	17	35	33	15	120	13	10	0	55	55	21	20	20	28	14	21	17	20	17	14	19	14	14	7	19	8	26	20	10	21	14	10	14	13	5	0	16	0	14
OTU0731	0	0	0	0	0	0	0	0	0	0	0	0	0	0	0	0	0	0	0	0	0	8	0	0	0	0	0	0	0	10	0	0	0	0	7	0	0	11	0	0	0	0	0	0	0	0	0	0	0
OTU0732	0	0	0	0	0	0	0	0	0	0	0	0	0	0	0	0	0	0	0	0	0	0	0	0	0	0	0	0	0	0	0	37	0	0	0	0	0	0	0	0	0	0	0	0	0	0	0	0	0
OTU0733	0	0	0	0	0	0	0	0	0	0	0	0	0	0	0	0	0	0	0	0	0	0	10	0	0	0	0	0	0	0	0	0	0	0	0	0	13	0	0	0	0	0	0	0	0	0	0	0	0
OTU0734	64	93	804	0	0	0	0	71	0	92	92	178	0	0	0	0	0	0	0	89	348	274	267	226	361	273	288	251	274	311	117	353	198	167	185	200	138	85	175	225	0	53	0	0	113	61	0	0	0
OTU0735	0	0	0	0	0	0	0	0	0	0	0	0	0	0	0	0	0	0	0	0	0	0	0	3	0	0	0	0	0	5	0	0	0	0	0	0	0	0	0	4	0	0	0	0	0	0	0	0	0
OTU0736	0	0	0	0	0	0	0	0	0	0	0	0	0	0	30	0	0	0	0	0	0	0	0	0	0	0	0	0	0	0	0	0	0	0	0	0	0	0	0	0	0	0	0	0	0	0	0	0	0
OTU0737	0	0	0	0	0	0	0	0	0	0	0	0	0	0	0	0	0	0	0	0	0	0	0	0	0	0	5	0	0	0	0	0	9	0	0	8	0	0	0	0	0	0	0	0	0	0	0	0	0
OTU0738	0	0	0	0	0	0	0	0	0	0	0	0	0	0	0	0	0	0	0	0	0	0	0	0	0	0	0	0	0	0	0	0	0	0	0	0	0	0	0	0	0	0	0	0	16	34	0	0	0
OTU0739	0	0	0	0	0	0	0	0	0	0	0	0	0	0	0	0	0	0	0	0	14	25	0	0	0	30	27	16	16	19	0	0	0	0	20	34	25	14	11	23	0	0	0	0	0	0	0	0	0
OTU0740	0	0	0	0	0	0	0	0	0	0	0	0	0	0	0	0	0	0	0	0	13	0	0	0	0	0	0	0	12	0	0	0	6	0	7	5	0	0	10	0	0	0	0	0	0	0	0	0	0
OTU0741	0	0	0	16	0	0	0	0	0	16	13	0	8	0	0	0	0	0	0	0	0	0	0	0	0	0	0	0	0	0	0	0	0	0	0	0	0	0	0	0	0	0	0	0	7	0	0	0	0
OTU0742	0	40	0	0	33	0	0	6	0	0	93	31	0	93	0	6	7	72	0	26	25	0	16	0	17	22	16	0	30	14	0	11	21	24	20	19	26	35	26	0	0	0	23	0	0	0	0	0	0
OTU0743	0	0	0	0	0	18	0	0	0	0	0	0	0	0	0	0	0	0	0	0	55	57	26	35	37	40	0	0	67	33	12	42	0	99	0	0	12	0	0	22	15	0	0	0	0	67	0	0	17
OTU0744	0	0	0	0	0	0	0	0	0	0	0	0	0	0	0	0	0	0	0	0	0	0	0	0	0	0	0	0	0	9	0	0	0	0	0	0	0	18	0	0	0	0	0	0	0	0	0	0	0
OTU0745	0	0	0	0	0	0	0	0	0	0	0	0	0	0	0	0	0	0	0	0	0	0	0	8	8	0	7	0	0	0	0	0	0	5	0	0	0	0	0	8	0	0	0	0	0	0	0	0	0
OTU0746	0	0	0	0	0	0	0	0	0	0	0	0	0	0	0	0	0	0	0	0	0	0	0	0	0	0	0	0	0	0	0	0	0	0	0	0	0	0	0	0	0	0	0	0	0	0	0	0	0
OTU0747	0	0	0	0	0	0	0	0	0	0	0	0	0	14	0	0	0	0	0	41	37	0	34	0	37	34	28	26	52	64	0	49	26	0	0	68	45	28	27	0	16	0	18	0	5	0	0	0	0
OTU0748	0	0	0	0	0	0	0	0	0	0	0	0	0	0	0	0	0	0	0	0	0	65	0	0	0	0	0	0	24	0	0	0	0	0	0	0	9	0	0	0	0	0	0	0	0	0	0	0	0
OTU0749	0	0	0	0	0	0	0	0	0	0	0	0	0	6	0	0	0	0	0	0	0	0	0	0	0	0	0	0	0	0	0	0	0	0	0	0	0	0	0	0	0	0	0	0	0	0	0	0	0
OTU0750	0	0	0	0	0	0	0	0	0	0	0	0	0	0	0	0	0	0	0	0	0	0	0	0	0	0	0	0	0	0	0	0	0	0	0	0	0	0	0	0	0	0	0	10	0	0	0	0	0
OTU0751	0	0	0	0	0	0	0	0	0	0	0	0	0	0	0	0	0	0	0	0	0	0	6	0	0	8	0	0	0	0	0	0	0	0	0	0	0	0	0	0	0	0	0	0	0	0	0	0	0
OTU0752	0	0	0	0	0	0	0	0	0	0	0	0	0	0	0	0	0	0	0	0	0	0	18	0	0	0	0	0	0	0	55	0	0	0	0	0	0	0	0	0	0	0	0	0	0	162	0	0	0
OTU0753	0	0	0	0	0	0	0	0	0	0	0	0	0	0	0	0	0	0	0	0	0	0	0	0	0	6	0	4	0	0	0	0	0	0	5	0	0	7	0	0	0	0	0	0	0	0	0	0	0
OTU0754	0	0	0	0	0	0	7	0	0	0	0	0	0	0	0	0	0	0	0	0	87	132	26	130	125	157	152	227	113	94	70	154	143	106	87	184	199	186	161	229	0	0	0	0	0	0	0	0	0
OTU0755	0	0	0	0	0	0	14	0	0	0	0	95	0	20	0	0	0	0	0	0	32	53	0	0	49	61	80	0	91	58	21	0	84	38	0	0	0	23	69	0	0	0	0	0	0	0	0	0	0
OTU0756	0	0	0	0	0	0	0	0	0	0	40	0	0	0	0	0	0	0	0	0	0	0	19	8	0	0	0	10	0	0	8	13	0	0	0	0	0	8	8	0	0	0	0	0	0	0	0	0	0
OTU0757	0	0	0	0	0	0	0	0	0	0	0	53	0	0	17	0	0	0	27	20	0	0	4	0	0	0	0	0	0	0	0	0	0	0	0	0	14	0	0	0	0	0	0	0	0	0	0	0	0
OTU0758	0	0	0	0	0	0	0	0	0	0	0	0	0	0	0	0	0	0	0	0	0	0	0	0	0	0	0	9	0	6	0	0	0	0	0	0	0	0	0	0	0	0	0	0	0	0	0	0	0
OTU0759	0	0	0	0	0	0	0	0	0	0	0	0	0	0	0	0	0	0	0	0	0	21	0	34	0	43	0	0	28	21	0	14	0	0	0	30	26	26	18	40	0	0	0	0	0	0	0	0	0
OTU0760	0	0	0	0	0	0	0	0	0	0	0	0	0	0	0	0	0	0	0	0	0	0	0	0	0	0	0	0	0	0	0	0	0	0	0	0	0	0	0	0	0	0	14	0	0	7	0	0	0
OTU0761	0	0	0	0	0	0	0	0	0	0	0	0	0	0	0	0	0	0	0	0	0	39	0	0	0	42	0	41	35	0	0	0	30	0	30	49	34	57	0	49	13	0	0	0	0	31	0	0	0
OTU0762	0	0	0	0	0	0	0	0	0	0	0	0	0	0	0	0	0	0	0	0	0	0	0	0	0	0	0	0	0	0	0	0	0	0	0	0	0	0	0	0	0	0	0	0	0	0	0	0	0
OTU0763	0	0	0	0	0	0	0	0	0	0	0	0	0	0	0	0	0	0	0	0	28	0	0	0	0	27	0	38	26	26	0	12	0	24	10	30	47	28	50	50	0	0	0	0	0	0	0	0	0
OTU0764	43	52	0	118	0	40	0	24	29	62	0	116	63	0	89	13	61	65	77	0	83	117	128	0	59	125	168	108	139	82	42	54	108	55	72	55	128	148	0	159	0	0	42	0	42	0	12	47	40
OTU0765	0	0	0	0	0	0	0	0	0	0	0	0	0	0	0	0	0	0	0	0	0	0	0	0	0	0	0	0	0	0	0	20	0	0	0	0	0	0	0	62	0	0	0	0	0	0	0	0	0
OTU0766	0	0	0	0	0	0	0	0	0	0	0	0	0	0	0	0	0	0	0	0	0	7	0	0	0	0	0	0	0	0	0	0	0	0	0	0	0	0	0	0	0	0	0	0	0	0	0	0	0
OTU0767	0	0	0	0	0	0	0	0	0	0	0	0	0	0	0	0	0	0	0	0	0	0	0	0	0	0	0	9	0	0	0	0	0	8	0	0	0	0	0	0	0	0	0	0	0	0	0	0	0
OTU0768	0	0	0	0	0	0	0	0	0	0	0	0	0	0	0	0	0	0	0	0	0	12	0	0	0	0	17	8	15	9	0	0	19	0	0	0	13	0	0	16	0	0	0	0	0	0	0	0	0
OTU0769	0	0	0	12	0	0	0	0	0	8	0	0	0	0	0	0	0	0	0	0	6	0	0	0	0	0	0	6	0	0	0	0	12	9	0	0	0	0	0	0	0	0	0	0	0	0	0	0	0
OTU0770	0	0	0	0	0	0	0	0	0	0	0	0	0	0	0	0	0	0	0	0	0	34	31	43	29	53	40	52	39	26	0	32	20	31	0	34	55	18	38	41	0	0	0	0	0	0	0	0	0
OTU0771	0	0	0	0	0	0	0	0	0	0	0	0	0	0	0	0	0	0	0	0	8	0	9	0	15	10	0	0	10	0	0	0	0	9	0	0	0	0	15	0	0	0	0	0	0	0	0	0	0
OTU0772	0	0	0	0	0	0	0	0	0	0	0	0	0	0	0	0	0	0	0	0	0	0	0	0	0	0	0	0	0	0	0	0	0	0	10	19	0	0	0	0	0	0	0	0	0	0	0	0	0
OTU0773	0	0	0	0	0	0	0	0	0	0	0	0	0	0	0	0	0	0	0	0	0	0	0	0	0	0	0	0	0	0	0	0	0	0	0	0	6	5	0	9	0	0	0	0	0	0	0	0	0
OTU0774	0	0	0	0	0	0	0	0	0	0	0	0	0	0	0	0	0	0	0	0	0	0	2	0	0	0	0	0	0	0	8	0	0	18	0	22	13	11	12	0	0	0	0	0	0	0	0	0	0
OTU0775	0	0	0	0	0	0	0	0	0	0	65	0	0	0	8	15	0	8	0	9	0	0	0	0	0	0	0	0	0	0	12	0	0	8	0	0	0	0	0	4	0	14	0	0	0	40	0	0	0
OTU0776	0	0	0	0	0	0	0	0	0	0	0	0	0	0	0	0	0	0	0	0	0	0	0	0	0	0	22	15	10	0	0	0	0	0	12	0	0	27	0	0	0	0	0	0	0	0	0	0	0
OTU0777	0	0	0	0	0	0	0	0	0	0	10	0	0	16	10	0	0	0	0	0	16	0	20	12	0	13	40	14	0	18	0	0	0	27	19	36	0	30	37	0	0	0	0	31	0	0	0	0	0
OTU0778	0	0	0	0	0	0	0	0	0	0	0	0	0	0	0	0	0	0	0	0	0	0	0	6	0	8	0	0	0	9	0	0	0	5	10	10	0	0	0	14	0	0	0	0	0	0	0	0	0
OTU0779	0	0	0	0	0	0	0	0	0	0	0	0	0	0	0	0	0	0	0	0	0	0	0	0	0	0	0	0	0	0	0	6	0	0	0	0	0	0	0	10	0	0	0	0	0	0	0	0	0
OTU0780	0	0	0	20	0	11	0	8	0	0	53	83	0	0	0	0	0	0	0	27	108	157	207	119	38	163	132	206	247	61	137	240	209	192	20	148	149	366	77	253	121	0	0	255	20	96	0	0	0
OTU0781	0	0	0	8	0	0	0	0	0	0	0	0	0	0	0	0	0	0	0	0	0	0	0	16	0	0	0	17	19	0	0	0	0	16	0	21	0	16	0	22	0	0	0	0	0	0	0	0	0
OTU0782	34	0	0	0	0	0	6	0	0	0	0	0	0	0	0	0	0	0	0	0	52	57	44	57	59	0	0	0	0	138	60	0	0	84	0	13	0	0	30	0	0	0	0	0	0	0	0	0	0
OTU0783	0	0	0	0	0	0	0	0	0	0	0	0	0	0	0	0	0	0	0	0	0	0	0	0	34	0	0	0	0	0	0	0	0	0	29	38	37	33	0	41	0	0	0	0	0	0	0	0	0
OTU0784	0	0	0	0	0	0	0	0	0	0	0	0	15	0	0	0	0	0	0	0	0	0	0	9	0	0	0	0	0	0	0	0	16	19	11	17	0	0	9	15	0	0	0	0	0	0	0	0	0
OTU0785	0	0	0	0	0	0	0	0	0	0	0	0	0	0	0	0	0	0	0	0	0	0	0	0	8	0	0	0	12	0	0	0	0	0	0	0	0	0	0	0	0	0	0	0	0	0	0	0	0
OTU0786	0	0	0	0	0	0	0	0	0	12	0	0	0	0	0	0	0	0	0	0	0	0	0	0	0	0	0	0	0	0	0	0	0	0	0	0	0	0	0	0	0	0	0	0	0	0	0	0	0
OTU0787	0	0	11	0	0	0	0	0	0	0	0	0	0	0	0	0	0	0	0	0	0	0	12	0	0	0	0	0	0	0	0	0	0	0	0	0	0	0	0	0	0	0	0	0	0	0	0	0	0
OTU0788	0	0	0	0	0	0	0	0	0	20	0	0	0	0	0	19	0	0	0	0	0	0	0	0	0	0	0	0	0	0	0	0	0	0	0	0	0	0	0	0	0	0	15	0	0	0	0	0	0
OTU0789	0	0	0	0	0	34	0	0	0	0	0	0	0	0	43	0	0	0	10	0	7	0	5	3	0	0	0	0	0	0	0	3	0	0	0	2	0	0	0	0	0	0	0	0	0	0	0	0	0
OTU0790	0	0	0	0	0	0	0	0	0	0	0	0	0	0	0	0	0	0	0	0	0	0	0	0	0	0	0	0	0	0	0	0	0	0	0	0	0	0	0	0	0	0	57	0	0	0	0	0	0
OTU0791	0	0	0	0	0	0	0	0	0	0	0	0	0	0	0	0	0	0	0	0	0	0	6	0	0	0	0	0	0	7	0	0	0	0	0	4	0	0	0	2	0	0	0	0	0	0	0	0	0
OTU0792	0	0	0	99	0	0	0	0	0	0	0	0	0	28	0	0	0	0	22	0	22	21	23	0	0	0	0	19	28	0	70	45	29	47	45	59	0	43	108	46	0	0	0	0	0	0	0	0	0
OTU0793	0	0	0	0	0	0	0	0	0	0	0	0	0	0	0	0	0	0	0	0	0	0	0	0	0	0	0	0	0	0	0	0	0	6	0	0	0	0	0	0	0	0	0	0	0	0	0	0	0
OTU0794	0	0	0	0	0	0	0	0	0	0	0	0	0	0	0	0	0	0	0	0	7	0	0	0	0	0	0	0	0	0	0	0	0	0	0	0	0	0	0	0	0	11	0	0	0	0	0	0	0
OTU0795	0	0	0	0	52	0	0	0	0	0	0	0	0	0	0	0	0	29	20	0	0	0	0	0	0	5	0	0	0	0	10	0	0	0	0	0	0	9	0	10	0	0	0	0	0	0	0	0	0
OTU0796	0	0	0	0	0	0	0	0	0	0	0	0	0	0	0	0	0	0	0	0	0	0	0	13	0	0	0	4	3	5	0	0	0	0	0	6	13	0	0	8	0	0	0	0	0	0	0	0	0
OTU0797	0	0	0	0	0	0	0	0	0	0	0	0	0	0	0	0	0	0	0	0	11	0	0	0	0	0	0	0	0	0	0	0	0	0	0	0	0	4	0	0	0	0	0	0	0	0	0	0	0
OTU0798	0	0	0	0	0	0	0	0	0	0	0	0	0	0	0	0	0	0	0	0	22	0	8	22	0	16	0	19	22	16	0	0	0	0	0	35	0	0	25	24	0	0	0	0	0	0	0	0	0
OTU0799	0	0	0	0	0	0	0	0	0	0	0	0	0	0	0	0	0	0	0	0	0	37	0	0	0	0	0	0	0	18	0	0	0	0	0	0	0	0	0	0	0	0	26	0	0	0	0	0	0
OTU0800	0	0	0	0	0	0	0	0	0	0	0	0	0	0	0	0	0	0	0	0	0	0	0	0	0	0	0	0	0	0	0	41	7	0	0	0	0	0	0	0	0	0	0	0	0	0	0	0	0
OTU0801	0	0	0	0	0	0	0	0	0	0	0	0	0	0	0	0	0	0	0	0	31	0	0	14	35	27	0	23	0	0	0	0	55	0	17	0	29	23	29	36	0	0	0	0	0	0	0	0	0
OTU0802	0	0	0	0	0	0	0	0	0	0	0	0	0	0	0	0	0	0	0	0	9	11	0	0	0	10	0	17	10	0	0	0	0	29	6	0	17	0	0	14	0	0	0	0	0	0	0	0	0
OTU0803	0	0	0	0	0	0	0	0	0	0	0	0	10	0	0	0	0	0	0	0	0	0	0	0	0	0	18	0	0	32	0	0	18	0	0	13	0	21	19	0	0	80	0	0	0	0	0	0	0
OTU0804	0	14	0	0	0	0	0	0	0	0	0	0	0	0	0	0	0	0	0	46	54	60	66	64	70	60	68	62	67	67	59	101	79	89	49	102	57	81	62	95	0	0	24	0	0	0	0	0	0
OTU0805	0	0	0	0	0	0	0	0	0	0	0	0	0	0	0	0	0	0	0	0	0	0	0	0	0	0	0	0	0	0	0	0	0	19	0	0	0	0	0	23	0	0	0	0	0	12	0	0	0
OTU0806	79	54	0	67	40	36	51	86	107	56	58	53	89	44	139	99	51	198	26	0	0	23	0	0	0	33	24	30	44	0	0	32	0	25	0	0	0	0	0	65	112	0	0	0	46	0	0	50	82
OTU0807	0	0	0	0	0	0	0	19	0	0	0	0	16	0	0	0	0	0	0	0	0	0	0	0	0	0	0	0	0	0	0	0	0	0	0	0	0	0	0	0	0	0	0	0	0	0	0	0	0
OTU0808	0	0	0	0	0	0	0	0	0	12	0	0	0	0	0	0	0	0	0	0	0	0	0	0	17	0	0	0	14	12	0	0	0	0	0	0	0	0	0	0	0	0	12	21	0	83	0	0	0
OTU0809	0	0	0	0	0	0	0	0	0	0	0	0	53	0	0	0	0	0	0	0	0	0	0	0	0	0	0	0	0	0	0	0	0	0	0	0	0	0	0	0	0	0	0	0	0	43	0	0	0
OTU0810	0	0	0	0	0	0	0	0	0	0	0	0	0	0	0	0	0	0	0	0	0	5	5	0	0	9	7	7	10	4	0	6	5	0	0	8	18	0	18	8	0	0	0	0	0	0	0	0	0
OTU0811	0	0	0	0	0	0	0	0	0	0	0	0	0	0	0	0	0	0	0	0	0	0	0	0	0	0	0	0	0	0	7	0	0	0	0	0	0	0	0	0	0	0	28	0	0	15	0	0	0
OTU0812	0	7	0	0	0	0	0	0	0	0	0	0	0	51	28	12	0	73	52	0	0	0	0	0	0	11	22	14	20	0	0	17	0	0	0	0	0	0	0	12	0	0	0	0	0	0	0	0	17
OTU0813	0	0	0	0	0	0	0	0	0	6	0	0	0	0	0	0	0	34	0	0	0	0	0	0	0	0	0	0	0	0	0	0	0	0	0	0	0	0	0	0	0	0	0	0	0	0	0	0	0
OTU0814	0	0	0	0	0	0	0	0	0	0	0	0	0	0	0	0	0	0	0	0	7	0	0	0	0	0	0	0	12	0	0	0	0	0	0	0	9	14	0	0	0	0	0	0	0	0	0	0	0
OTU0815	0	0	0	0	0	0	0	0	0	0	0	0	0	0	0	0	0	0	0	0	0	0	0	0	0	0	0	0	7	0	0	0	0	0	0	0	0	0	0	13	0	0	0	0	0	0	0	0	0
OTU0816	0	0	0	0	0	0	0	0	0	0	0	0	0	0	0	0	0	0	10	0	0	0	0	0	0	0	0	0	0	0	0	0	0	0	0	0	0	0	11	0	0	0	9	0	0	0	0	0	0
OTU0817	0	0	0	0	0	0	0	0	0	0	0	0	0	0	0	0	0	0	0	0	0	0	0	0	0	0	0	0	0	0	0	0	0	0	0	0	0	0	0	3	0	0	0	0	0	0	0	0	0
OTU0818	0	0	0	0	0	0	0	0	0	0	0	0	0	0	0	0	0	0	0	0	0	19	0	29	0	0	18	0	0	0	31	0	0	0	0	0	0	0	0	0	0	0	0	0	0	31	0	0	0
OTU0819	0	0	0	0	0	0	0	0	0	0	0	0	0	0	0	0	0	0	0	0	0	0	0	13	14	14	18	0	0	0	8	10	13	21	16	21	12	14	30	42	0	0	0	0	0	0	0	0	0
OTU0820	0	0	0	0	0	0	0	0	0	0	0	0	0	0	0	0	0	0	0	0	0	0	0	0	0	0	5	0	0	0	0	0	12	0	0	0	0	0	0	11	0	0	0	0	0	0	0	0	0
OTU0821	0	0	0	0	0	0	0	0	0	0	0	0	0	0	0	0	0	0	0	7	0	0	0	0	0	0	0	7	0	0	0	0	7	0	0	0	0	0	0	0	0	0	0	0	0	0	0	0	0
OTU0822	749	57	25	67	0	22	70	31	16	0	369	96	0	0	0	38	0	51	0	0	580	315	361	161	122	129	204	95	167	200	617	0	218	55	25	25	90	83	57	0	0	437	0	61	198	37	13	0	127
OTU0823	0	0	0	0	0	0	0	0	0	0	0	0	0	0	0	0	0	0	0	0	0	0	0	0	0	0	0	0	0	0	0	0	0	33	0	5	0	0	0	0	0	0	0	0	0	0	0	0	0
OTU0824	0	0	0	0	39	0	0	0	0	0	0	0	0	0	0	0	0	0	0	0	0	0	6	0	0	18	0	0	0	0	0	0	0	0	0	0	0	13	0	0	0	0	0	0	0	0	0	0	0
OTU0825	0	0	0	0	0	0	0	0	0	0	0	0	0	0	0	0	0	0	0	0	27	0	15	34	31	28	17	21	32	47	19	11	27	33	22	28	16	20	28	30	0	10	0	0	0	0	0	0	0
OTU0826	0	0	0	0	0	0	0	0	0	0	0	0	0	0	0	0	0	0	0	0	0	0	0	0	0	0	0	24	0	0	0	0	0	0	0	19	0	0	23	0	0	0	0	0	0	0	0	0	0
OTU0827	0	0	0	0	0	0	0	0	0	0	0	0	0	0	0	0	0	0	0	5	0	22	0	12	20	13	0	0	18	0	33	0	0	24	16	21	0	0	23	0	0	0	0	0	0	0	0	0	0
OTU0828	0	0	0	18	0	0	0	0	8	8	0	0	0	0	0	0	0	0	0	0	0	6	0	0	0	0	0	15	0	0	0	0	0	0	0	0	0	0	0	0	6	0	0	0	0	0	0	10	0
OTU0829	11	24	14	31	20	20	10	13	16	20	0	0	0	0	0	0	0	0	0	0	0	0	0	0	0	0	0	0	0	0	0	0	0	0	0	0	0	0	0	0	0	0	0	0	0	0	4	0	12
OTU0830	0	0	0	0	0	0	0	0	0	0	0	0	59	0	0	0	0	0	0	0	0	0	0	0	0	0	0	0	0	0	0	0	0	0	0	0	0	0	0	18	0	0	27	0	0	0	0	0	0
OTU0831	0	0	0	0	0	0	0	0	0	0	0	0	0	0	0	0	0	0	0	0	0	0	0	0	0	0	0	0	0	0	0	0	0	0	0	0	0	0	0	0	19	0	0	0	0	1	0	0	0
OTU0832	0	0	0	0	0	0	0	0	0	0	0	0	0	0	0	0	0	0	0	0	0	8	0	0	0	0	10	0	11	0	0	0	0	0	0	0	8	0	11	0	0	0	0	0	0	0	0	0	0
OTU0833	0	0	0	0	7	0	0	0	0	0	0	0	0	0	0	0	0	0	0	0	0	53	0	35	37	0	30	0	21	0	0	29	16	0	30	12	0	11	28	27	0	0	0	0	0	0	0	0	0
OTU0834	0	0	0	0	0	0	0	0	0	8	16	23	0	0	38	0	0	0	0	0	0	0	96	0	0	0	24	0	0	0	0	0	0	0	0	0	0	0	0	11	0	0	0	16	0	0	0	0	0
OTU0835	0	0	0	0	263	0	0	0	0	0	0	0	0	0	0	0	0	37	0	0	0	0	0	0	0	0	0	0	0	0	0	0	0	0	0	0	0	0	0	0	0	0	0	0	0	0	0	0	0
OTU0836	0	0	0	0	0	0	0	0	0	0	0	0	0	0	0	0	0	0	0	0	0	0	0	0	0	0	0	0	0	0	0	0	0	0	0	0	0	0	0	0	0	0	22	0	0	56	0	0	0
OTU0837	0	0	0	0	0	0	0	0	0	0	0	0	0	0	0	0	0	0	0	0	0	6	9	0	0	0	0	0	0	14	0	0	0	0	0	0	0	0	0	0	0	0	0	0	0	0	0	0	0
OTU0838	0	0	0	0	0	0	0	0	0	0	0	0	0	0	0	0	0	0	0	0	0	0	0	0	0	9	0	0	21	12	13	0	0	0	0	0	11	0	18	12	0	0	0	0	0	0	0	0	0
OTU0839	0	0	0	0	0	0	0	0	0	0	0	0	0	0	0	0	0	0	0	0	0	0	0	0	0	0	0	0	0	0	0	0	0	0	0	0	0	0	0	0	0	0	0	0	0	0	0	0	0
OTU0840	23	0	0	0	0	0	0	0	0	22	0	149	63	38	38	27	17	91	0	49	44	51	50	33	0	0	56	37	38	61	0	41	0	25	32	28	50	35	32	41	0	0	0	0	0	0	16	0	0
OTU0841	0	0	0	0	0	0	0	0	0	0	0	0	0	0	0	0	0	0	0	67	60	118	88	0	49	68	104	37	48	59	25	112	119	39	43	77	55	121	81	169	0	0	9	16	0	0	0	0	0
OTU0842	0	0	0	0	0	0	0	0	0	0	0	0	0	0	0	0	0	0	0	0	0	0	0	0	19	0	0	0	0	0	0	0	0	0	0	0	0	0	0	0	0	10	0	0	0	0	0	0	0
OTU0843	0	0	0	0	0	0	0	0	0	0	0	0	0	0	0	0	0	0	0	0	0	0	0	0	0	0	0	0	0	0	8	0	0	0	0	0	0	0	0	0	0	0	11	0	0	0	0	0	0
OTU0844	0	0	0	0	0	0	0	0	0	0	0	0	0	0	0	0	0	0	0	0	0	0	0	0	0	0	0	9	8	8	0	0	0	0	10	0	0	0	0	0	0	0	0	0	0	0	0	0	0
OTU0845	0	0	0	0	0	0	0	0	0	0	0	0	0	0	0	22	0	0	0	0	0	0	0	0	0	0	0	0	0	0	0	0	0	0	0	0	0	0	0	0	0	0	0	0	0	0	0	0	0
OTU0846	0	0	0	0	0	0	0	0	0	0	0	0	0	0	0	0	0	0	0	0	0	0	5	0	12	0	0	0	0	0	0	0	0	0	0	0	0	0	0	0	0	0	0	0	0	0	0	0	0
OTU0847	0	0	0	0	0	0	0	0	0	0	0	0	0	0	0	0	0	0	0	0	0	0	0	0	0	0	4	0	0	0	0	6	0	0	0	0	5	0	0	0	0	0	0	0	0	0	0	0	0
OTU0848	0	0	0	0	0	0	0	0	0	0	4	0	0	30	5	0	0	0	6	0	0	0	0	0	0	0	0	0	0	0	0	0	0	0	5	25	0	18	0	0	0	17	0	0	0	0	0	0	0
OTU0849	0	0	0	0	0	0	0	0	0	0	0	0	0	0	0	0	0	0	0	0	0	0	0	4	5	5	0	0	0	0	0	9	6	6	0	0	0	0	18	13	0	0	0	0	0	0	0	0	0
OTU0850	0	0	0	0	0	0	0	0	0	0	0	0	0	0	0	0	0	0	0	0	0	4	0	0	0	0	6	0	0	0	0	0	15	6	0	0	3	0	0	5	0	0	0	0	0	0	0	0	0
OTU0851	0	0	0	0	8	0	0	0	0	0	0	0	0	0	0	0	0	0	0	0	0	0	0	0	0	0	0	0	0	0	0	0	0	0	0	0	0	0	0	0	0	0	0	0	0	0	0	0	0
OTU0852	0	0	0	0	0	0	0	0	0	0	0	0	0	0	0	0	0	0	0	0	82	66	36	48	57	47	101	85	92	59	62	74	100	90	63	96	48	58	106	96	0	0	0	0	0	0	0	0	0
OTU0853	0	0	0	0	0	0	0	0	0	0	0	0	0	0	0	0	0	0	0	0	8	0	0	0	0	0	0	0	0	0	0	0	0	0	0	0	0	0	0	0	0	0	0	0	0	0	0	0	0
OTU0854	0	0	0	0	0	0	0	0	0	0	0	0	0	0	0	0	0	0	0	0	0	0	0	6	0	0	27	0	0	11	0	0	0	0	0	0	0	0	0	0	0	0	0	0	0	0	0	0	0
OTU0855	0	0	0	0	0	0	0	0	0	0	0	0	0	0	0	0	0	0	0	0	0	0	0	0	0	0	0	0	0	0	0	0	0	0	0	9	6	0	0	0	0	0	0	0	0	0	0	0	0
OTU0856	0	0	0	0	0	0	0	0	0	0	0	0	0	0	0	0	0	0	0	0	0	0	0	0	0	0	0	0	0	0	0	0	0	0	0	0	0	0	0	0	0	0	0	0	0	39	0	0	0
OTU0857	0	0	0	0	0	0	0	0	0	0	0	0	0	0	0	0	0	0	0	0	0	0	0	0	0	7	0	0	0	0	0	0	0	0	0	0	0	7	0	0	0	0	0	0	0	0	0	0	0
OTU0858	0	0	0	0	0	0	0	0	0	0	0	0	0	0	0	0	0	0	0	0	0	0	5	0	0	0	0	0	0	0	0	0	0	0	0	0	34	0	0	0	0	0	0	0	0	50	0	0	0
OTU0859	0	0	0	0	0	0	0	0	0	0	0	0	0	0	0	0	0	0	0	0	0	0	0	0	0	0	3	0	0	0	0	0	0	0	0	9	0	8	0	0	0	0	0	0	0	0	0	0	0
OTU0860	0	0	0	0	0	0	0	0	0	0	0	0	0	0	0	0	0	0	0	0	0	0	0	0	0	0	0	9	0	6	0	0	0	0	0	0	0	0	0	0	0	0	0	0	0	0	0	0	0
OTU0861	12	0	0	0	15	0	17	0	0	0	0	0	0	169	0	0	0	0	29	47	35	43	46	50	31	27	38	22	29	45	63	16	26	106	29	51	94	0	97	49	0	0	71	17	0	0	0	6	0
OTU0862	0	0	0	0	0	0	0	0	0	0	0	0	0	0	0	0	0	0	0	0	63	82	19	83	189	177	64	121	215	99	40	171	43	35	65	198	113	119	155	172	0	0	0	0	0	5	0	0	0
OTU0863	0	0	0	0	0	0	0	0	0	0	0	0	0	0	0	0	0	0	0	0	0	18	0	0	0	0	0	0	0	0	0	0	0	0	15	0	0	0	0	0	0	0	0	0	0	0	0	0	0
OTU0864	0	0	0	0	0	0	0	0	0	0	0	0	0	0	0	0	0	0	0	0	0	0	0	0	0	0	0	0	0	8	0	0	12	0	6	0	0	0	0	0	0	0	0	0	0	0	0	0	0
OTU0865	0	0	0	0	0	0	0	0	0	0	0	0	0	0	0	0	0	0	3	0	0	0	0	0	0	0	16	0	0	0	0	0	0	0	0	0	0	0	0	0	0	0	0	0	0	0	0	0	0
OTU0866	0	0	0	0	0	0	0	0	0	0	0	0	0	0	0	0	0	0	0	0	0	0	0	0	0	0	0	0	0	0	0	0	0	0	0	0	0	0	0	0	0	0	0	0	0	0	0	0	0
OTU0867	0	101	35	135	72	47	36	63	67	143	36	96	112	16	179	54	22	93	119	73	81	193	66	93	92	160	128	104	93	102	69	116	95	75	84	155	117	199	84	115	0	29	52	0	46	0	32	43	81
OTU0868	0	0	0	0	0	0	0	0	0	0	0	0	13	0	0	0	0	0	0	0	0	0	0	0	0	0	0	0	0	0	0	0	0	0	0	0	0	0	0	0	0	0	0	0	0	0	0	0	0
OTU0869	0	0	0	0	0	0	0	0	0	15	0	0	0	0	0	0	0	0	0	0	0	0	0	0	0	0	0	0	15	14	22	0	0	0	0	0	0	0	0	0	20	0	78	0	54	187	13	0	15
OTU0870	0	0	0	0	0	0	0	0	0	0	0	0	0	0	0	0	0	0	0	0	0	0	0	0	0	0	0	0	0	0	0	0	0	0	0	10	5	0	8	0	0	0	0	0	0	0	0	0	0
OTU0871	0	0	0	0	0	0	0	0	0	0	0	0	0	0	0	0	0	0	0	0	12	0	0	0	0	0	0	31	0	0	25	0	0	16	0	0	0	0	0	0	26	0	44	0	38	66	0	0	0
OTU0872	0	0	15	0	0	0	0	0	0	0	0	0	0	0	0	0	0	0	71	54	0	0	0	52	0	0	0	17	0	0	0	0	0	0	0	0	34	0	72	0	0	23	88	29	0	0	0	0	0
OTU0873	0	0	0	0	0	0	0	0	0	0	0	0	0	0	0	0	0	0	0	0	0	0	0	19	0	0	0	0	0	0	19	0	17	0	0	0	0	0	0	0	0	0	0	0	0	0	0	0	0
OTU0874	0	17	0	0	56	0	11	0	0	0	89	199	0	4	0	0	37	0	133	56	56	74	51	28	28	58	71	68	34	84	155	39	108	68	25	19	46	100	48	97	13	267	86	68	60	241	47	4	0
OTU0875	0	0	0	0	0	0	0	0	0	19	0	0	0	0	0	0	0	0	0	0	4	5	5	0	12	9	9	0	0	6	5	0	0	0	0	0	0	0	0	0	0	0	0	0	0	0	0	0	0
OTU0876	0	0	0	0	0	0	0	0	0	0	0	0	0	0	0	0	0	0	0	0	0	0	0	0	0	0	0	0	0	0	0	0	0	0	12	0	0	0	0	0	0	5	7	0	0	21	0	0	0
OTU0877	0	0	0	0	0	0	0	0	0	0	0	0	0	0	0	0	0	0	0	0	0	0	7	0	0	0	9	0	0	4	0	0	0	0	0	0	0	0	0	0	0	0	0	0	0	0	0	0	0
OTU0878	0	0	0	0	0	0	0	13	0	0	0	0	0	0	0	0	0	0	0	0	0	0	0	0	0	0	0	0	0	0	0	0	0	0	0	0	0	0	0	0	0	0	0	0	0	0	0	0	45
OTU0879	0	0	0	0	0	0	0	0	0	0	0	0	0	0	0	0	0	0	0	0	0	0	0	0	0	0	26	36	22	0	0	0	42	0	0	0	0	0	0	0	0	0	0	0	0	56	0	0	0
OTU0880	0	0	0	0	0	0	0	0	0	0	0	0	0	0	0	0	0	0	0	0	0	0	20	0	0	0	0	0	0	0	0	0	0	0	30	32	0	0	0	0	0	0	0	0	0	0	0	0	0
OTU0881	0	0	0	0	0	0	0	0	0	0	0	0	0	0	8	20	0	0	0	0	0	0	0	0	0	0	0	0	0	0	0	0	0	0	0	0	0	0	0	0	0	0	0	0	0	0	0	0	0
OTU0882	0	0	0	0	0	0	8	0	0	0	0	0	0	0	0	0	0	0	0	0	0	0	0	0	0	0	13	0	0	0	0	0	0	0	0	0	0	0	0	0	0	0	0	0	0	0	0	0	0
OTU0883	0	0	0	0	0	0	0	0	0	0	0	0	0	0	0	0	0	0	0	0	0	0	0	0	0	0	0	0	0	0	0	0	0	0	0	0	0	0	0	0	12	0	0	0	0	0	0	0	0
OTU0884	0	0	0	0	0	0	0	0	0	0	0	0	0	0	0	0	0	0	0	0	9	0	0	0	0	0	0	0	0	0	12	0	6	0	0	0	0	0	20	0	0	0	0	0	0	0	0	0	0
OTU0885	0	0	0	0	0	0	0	0	0	0	9	0	0	0	0	0	0	0	0	0	0	0	0	0	0	0	45	0	0	0	0	6	17	0	0	0	10	18	0	0	28	0	0	0	0	38	0	0	0
OTU0886	0	0	0	0	0	0	0	0	0	0	0	0	0	0	0	0	0	0	35	0	27	116	26	31	44	27	97	29	32	111	22	30	109	131	40	61	158	76	46	100	21	0	24	0	0	32	0	0	0
OTU0887	0	0	0	0	0	0	0	0	0	17	0	0	0	0	5	0	0	0	0	0	0	38	0	0	31	28	28	32	79	27	54	41	89	0	64	0	69	32	44	69	0	0	0	0	0	0	0	0	27
OTU0888	0	0	0	0	0	0	0	0	0	0	0	0	0	0	0	0	0	0	0	0	0	0	0	0	0	0	0	0	0	16	0	0	0	0	0	0	0	0	0	29	0	0	0	0	0	0	0	0	0
OTU0889	0	0	0	0	0	0	0	0	0	0	0	0	0	0	0	0	0	0	0	0	0	0	0	0	0	0	0	0	0	0	0	0	0	0	0	0	0	10	0	0	0	0	0	0	0	0	0	0	0
OTU0890	0	0	0	0	0	0	0	0	0	0	0	0	0	0	0	0	0	0	0	0	0	0	0	0	0	0	0	0	0	0	0	0	0	0	14	0	0	0	0	0	0	0	0	0	0	0	0	0	0
OTU0891	0	0	0	0	0	0	0	0	0	0	0	0	0	0	0	0	0	0	0	0	0	0	0	0	15	0	0	0	0	0	0	0	0	0	0	0	13	0	0	0	0	0	0	0	0	0	0	0	0
OTU0892	0	0	0	0	0	0	0	0	0	0	0	0	0	0	0	0	0	0	0	0	38	69	56	40	52	66	37	29	53	59	0	72	68	53	0	63	53	73	66	112	0	0	0	0	0	0	0	0	0
OTU0893	0	0	0	0	0	0	0	0	0	0	0	0	0	0	0	0	0	0	0	0	0	0	0	0	0	0	0	0	0	15	0	0	0	0	12	0	0	0	0	0	0	0	0	0	0	0	0	0	0
OTU0894	0	0	0	0	0	0	0	0	0	0	0	0	0	0	0	0	0	0	0	0	0	0	0	0	0	0	32	0	0	29	0	34	26	0	0	0	31	0	0	0	0	0	0	0	0	0	0	0	0
OTU0895	0	0	0	0	0	0	0	0	0	0	0	0	0	0	0	0	0	0	0	0	0	0	9	0	0	0	0	0	0	0	0	0	0	0	0	0	0	0	0	10	0	0	0	0	0	0	0	0	0
OTU0896	0	0	0	0	0	0	0	0	0	0	0	0	0	0	0	0	0	0	0	0	0	0	7	0	7	0	0	0	0	0	0	0	0	9	17	16	0	0	0	0	0	0	0	0	0	0	0	0	0
OTU0897	0	0	0	0	0	0	0	0	0	0	0	0	0	0	0	0	0	0	0	0	55	0	89	45	26	58	83	59	68	53	0	0	44	60	33	51	74	147	89	86	0	0	0	0	0	0	0	0	0
OTU0898	0	0	0	0	0	0	0	0	0	0	0	0	0	0	0	0	0	0	0	0	0	0	0	0	0	0	0	0	0	0	0	9	0	0	0	0	0	0	0	0	0	0	0	0	0	0	0	0	0
OTU0899	0	47	0	0	0	0	0	0	0	0	0	0	0	0	0	0	0	0	0	0	0	0	0	0	0	0	0	0	0	0	0	0	0	0	0	0	0	0	0	0	0	0	0	0	0	0	0	0	0
OTU0900	0	0	0	0	0	0	0	0	0	0	0	0	0	0	0	0	0	0	0	0	0	0	0	0	0	0	41	0	0	0	0	0	0	0	0	0	0	0	0	0	0	0	0	0	0	0	0	0	0
OTU0901	0	0	0	0	0	0	0	0	0	0	11	0	0	0	0	0	0	0	0	0	10	10	5	0	14	8	12	3	9	17	0	0	0	8	0	4	0	0	10	0	0	0	0	0	0	0	0	0	0
OTU0902	0	0	0	0	0	0	0	0	0	0	0	0	0	12	0	0	0	0	0	0	0	0	0	0	0	0	0	0	0	0	0	0	0	0	0	0	15	0	0	12	0	0	0	0	0	0	0	0	0
OTU0903	0	0	0	0	0	0	0	0	0	0	0	0	0	0	0	0	0	0	0	0	0	0	0	0	0	5	5	0	0	0	0	0	0	0	0	0	0	0	0	9	0	0	0	0	0	0	0	0	0
OTU0904	0	0	0	0	23	0	0	0	0	0	0	0	14	0	19	0	0	0	0	0	0	0	0	0	0	0	7	4	0	7	6	0	0	0	0	0	0	0	0	0	0	0	0	0	0	0	0	0	22
OTU0905	0	0	0	0	0	0	0	0	0	0	3	0	0	0	0	0	0	0	0	0	0	0	0	0	0	0	0	0	0	0	0	0	0	0	0	0	0	0	0	0	0	0	18	0	0	0	0	0	0
OTU0906	0	0	0	0	8	0	0	0	0	0	0	0	0	0	0	0	0	0	0	0	0	0	0	0	0	0	0	0	0	0	0	0	0	0	0	0	0	0	0	0	0	0	0	0	0	0	0	0	0
OTU0907	0	0	0	0	0	0	0	0	0	0	0	0	0	0	0	0	0	0	0	0	0	0	0	0	0	0	0	0	0	0	0	0	0	7	0	0	0	0	18	0	0	0	0	0	0	0	0	0	0
OTU0908	0	0	0	0	0	0	0	0	0	0	0	0	0	0	0	0	0	0	0	0	0	11	9	0	0	0	6	0	6	37	7	4	0	14	13	16	29	8	22	8	0	0	0	0	0	0	0	0	0
OTU0909	0	0	0	0	0	0	0	0	0	0	0	0	0	0	0	0	0	26	0	0	0	0	0	0	0	25	0	0	0	0	0	0	0	0	0	0	0	0	0	0	9	17	0	0	0	50	24	0	0
OTU0910	0	0	0	0	0	0	0	0	0	0	0	0	0	0	0	0	0	0	0	0	0	9	0	0	0	0	0	0	0	0	0	0	0	0	0	0	0	0	0	0	0	0	33	0	27	136	0	0	0
OTU0911	0	0	0	0	0	0	0	0	0	0	0	0	0	0	0	0	0	0	0	0	16	56	21	28	29	36	42	21	37	26	18	15	33	39	33	39	36	31	43	61	0	0	0	0	0	0	0	0	0
OTU0912	0	0	0	0	0	0	0	0	0	0	0	0	0	0	0	0	0	0	0	0	0	0	0	0	0	0	0	0	10	0	0	0	0	0	0	0	6	7	0	6	0	0	0	0	0	0	0	0	0
OTU0913	0	0	0	0	0	0	0	0	0	0	0	0	0	33	0	0	0	0	0	0	0	0	0	0	0	0	0	0	0	53	45	0	0	58	0	0	0	0	0	0	0	0	0	0	0	0	0	0	0
OTU0914	0	0	0	0	0	0	0	0	0	0	0	0	0	0	0	0	0	0	0	0	0	0	0	2	0	0	0	0	0	15	0	0	0	0	0	0	0	0	0	0	0	0	0	0	0	0	0	0	0
OTU0915	0	0	0	0	0	0	0	0	0	0	0	0	0	0	0	0	0	0	0	0	0	0	0	0	0	0	0	0	0	0	0	0	0	0	0	0	0	0	0	0	0	0	0	0	0	81	0	0	0
OTU0916	0	0	0	0	0	0	0	0	0	0	0	0	0	0	0	0	0	0	0	0	0	0	0	0	0	0	0	0	0	0	0	0	0	0	0	17	0	0	0	0	0	0	0	0	0	0	0	0	0
OTU0917	0	0	0	0	0	0	0	0	0	0	0	0	0	0	0	0	0	0	0	0	0	0	0	0	0	0	0	0	0	7	0	0	7	0	0	0	0	0	0	0	0	0	0	0	0	0	0	0	0
OTU0918	0	0	0	15	0	0	0	0	0	0	0	0	0	34	0	0	0	0	26	0	22	53	0	61	38	28	25	20	30	82	72	0	27	68	33	64	34	31	60	31	0	0	8	0	0	0	0	0	0
OTU0919	0	0	0	0	0	0	0	0	0	0	0	0	0	73	0	0	0	8	0	105	282	268	268	214	230	196	210	135	228	204	147	630	98	152	150	153	199	112	156	114	0	0	18	0	0	0	0	0	55
OTU0920	0	0	0	10	0	0	0	0	0	0	0	0	0	0	0	0	0	0	0	0	0	0	0	0	0	0	0	0	0	0	0	0	0	0	5	0	0	0	0	0	0	0	0	0	0	0	0	0	0
OTU0921	0	0	0	0	0	0	0	0	0	0	0	0	0	0	0	0	0	0	0	0	0	22	28	0	0	0	0	0	19	0	0	0	0	0	0	0	0	0	25	0	0	0	0	0	0	0	0	0	0
OTU0922	0	0	0	0	0	0	0	0	0	0	0	0	0	0	0	0	0	0	0	0	0	8	0	0	0	0	0	0	0	0	0	0	0	0	0	0	0	0	5	0	0	0	0	0	0	0	0	0	0
OTU0923	289	708	132	2266	165	133	345	123	353	1123	184	214	843	0	565	317	0	142	540	0	193	598	142	234	83	206	772	180	194	367	287	0	152	242	99	102	323	69	120	308	415	101	246	133	284	83	148	623	436
OTU0924	19	0	0	0	0	0	0	0	0	0	0	0	0	0	5	0	0	0	0	0	0	13	9	11	12	0	0	0	0	26	0	0	30	0	6	0	0	22	78	0	0	0	9	27	0	0	0	0	0
OTU0925	0	0	0	0	0	0	0	0	0	0	0	0	0	0	0	0	0	0	0	6	10	0	0	0	14	13	0	0	36	27	0	0	0	0	0	21	28	0	26	29	0	0	0	0	0	0	0	0	0
OTU0926	0	0	0	16	0	0	0	0	0	0	0	0	0	0	0	0	0	0	0	0	0	0	0	0	0	0	0	0	0	0	0	0	4	0	0	0	0	0	0	0	0	0	0	0	0	0	0	0	0
OTU0927	14	28	0	0	25	28	17	0	0	40	0	0	19	20	0	23	0	31	0	0	44	0	48	21	27	33	47	56	45	36	0	38	0	0	29	73	0	0	35	0	0	12	0	0	0	0	22	12	40
OTU0928	0	0	0	0	0	0	0	0	0	0	49	0	0	0	0	0	0	0	0	30	38	48	35	39	17	42	30	39	27	43	0	21	29	23	30	0	45	0	15	41	0	0	0	0	34	0	0	0	0
OTU0929	0	0	0	0	0	0	0	0	0	0	0	0	0	0	0	0	0	0	0	0	8	8	12	11	17	13	5	13	20	18	6	0	10	0	11	17	21	17	0	17	0	0	0	0	0	0	0	0	0
OTU0930	0	0	0	0	0	0	0	0	0	0	0	0	70	0	10	0	0	0	0	0	0	0	0	0	0	0	0	0	0	0	0	0	0	0	0	0	0	0	0	0	0	0	0	0	0	0	0	0	0
OTU0931	0	0	0	0	0	0	0	0	0	0	0	0	0	0	0	0	0	0	0	0	20	0	0	0	0	23	0	22	0	0	0	29	21	37	0	35	0	0	37	14	0	0	0	0	0	0	0	0	0
OTU0932	0	0	0	0	0	0	0	0	0	0	0	0	0	0	0	0	0	0	0	0	0	0	0	0	0	6	0	0	0	0	0	0	0	0	0	0	6	0	0	0	0	0	0	0	0	0	0	0	0
OTU0933	0	0	0	0	0	0	0	0	0	0	0	0	0	0	0	0	0	0	0	0	0	0	0	4	0	0	0	0	0	0	0	0	0	0	0	8	0	0	0	0	0	0	0	7	0	12	0	10	0
OTU0934	0	0	0	11	0	0	0	0	0	0	0	0	0	0	0	0	0	0	0	0	0	0	0	0	0	17	0	0	0	0	0	0	0	0	0	0	0	0	0	0	0	0	0	0	0	0	0	0	0
OTU0935	0	0	0	0	0	0	0	0	0	0	0	0	0	0	0	0	0	0	0	0	0	10	0	8	0	6	5	0	5	7	0	0	0	0	11	10	16	31	9	0	0	0	12	0	0	9	0	0	0
OTU0936	0	0	0	0	0	0	0	0	0	58	0	0	34	0	0	0	0	0	0	0	32	31	48	0	0	0	0	0	0	27	0	0	31	0	40	27	0	0	48	0	0	0	0	0	0	0	0	0	0
OTU0937	0	0	0	0	0	0	0	0	0	0	0	0	0	0	0	0	0	0	0	0	0	0	0	0	0	0	0	0	0	0	0	0	0	0	0	0	0	0	0	0	0	0	0	0	0	0	0	0	0
OTU0938	0	0	0	0	0	0	0	0	0	0	0	0	0	0	0	0	0	0	0	0	0	0	0	0	0	0	0	0	0	0	0	0	0	4	0	0	0	0	0	7	0	0	0	0	0	0	0	0	0
OTU0939	0	0	0	0	0	0	0	0	0	0	0	0	0	0	0	0	0	0	0	0	0	0	9	0	0	0	22	0	16	19	0	0	0	0	8	0	0	32	13	25	0	0	0	0	0	0	0	0	0
OTU0940	0	0	0	0	0	0	0	0	0	0	0	0	0	0	0	0	0	0	0	0	14	0	18	11	0	22	0	21	0	0	0	16	9	15	12	16	17	15	0	25	0	0	0	0	0	0	0	0	0
OTU0941	0	0	0	0	0	0	0	0	0	0	0	0	0	0	0	0	0	0	0	0	0	0	0	0	0	0	0	0	6	0	0	0	0	0	0	0	0	0	0	0	0	0	0	0	0	50	0	0	0
OTU0942	0	0	0	0	0	0	4	0	0	0	0	0	0	0	0	0	0	0	0	0	0	0	0	0	0	0	0	0	0	0	0	0	0	0	0	0	0	0	0	0	0	0	0	0	0	0	0	0	0
OTU0943	0	0	0	0	0	0	0	0	0	0	0	0	0	0	0	0	0	0	0	0	0	0	0	0	0	0	0	0	0	0	0	0	0	0	0	0	0	0	0	0	6	0	0	0	0	13	0	0	0
OTU0944	0	0	0	0	0	0	0	0	0	0	0	0	0	0	0	0	0	0	0	0	0	0	13	0	12	15	0	19	0	14	0	0	0	0	0	0	0	0	15	20	0	0	0	0	0	0	0	0	0
OTU0945	0	0	0	0	0	0	0	0	0	0	0	0	0	0	0	0	0	0	0	0	30	0	0	0	0	0	26	0	0	0	0	0	0	0	0	0	0	0	0	0	0	0	0	0	0	0	0	0	0
OTU0946	0	0	0	0	0	0	0	0	0	0	0	0	0	0	0	0	0	0	0	0	0	0	0	0	0	11	0	0	19	0	0	15	0	0	0	9	6	0	20	15	0	0	0	0	0	0	0	0	0
OTU0947	0	0	0	0	0	0	0	0	0	0	0	0	0	0	0	0	0	0	0	0	37	56	46	55	42	52	58	44	49	46	19	0	35	22	17	34	42	49	17	55	0	0	0	0	0	0	0	0	0
OTU0948	0	0	0	0	0	0	0	0	0	0	0	0	0	0	0	0	0	0	0	0	0	0	0	19	19	0	0	23	25	0	0	0	0	0	24	27	23	27	0	22	0	0	0	0	0	0	0	0	0
OTU0949	0	0	0	0	0	0	0	0	0	0	0	0	0	0	0	0	0	0	0	0	0	0	0	0	0	0	45	0	0	0	4	0	0	0	0	0	11	0	0	0	0	0	0	0	0	0	0	0	0
OTU0950	0	0	0	0	0	0	0	0	0	0	0	0	0	0	0	0	0	0	0	0	0	0	20	0	0	0	0	0	0	0	0	0	0	0	0	0	0	18	0	0	0	0	0	0	0	0	0	0	0
OTU0951	0	0	0	0	0	0	0	0	0	0	0	0	0	0	0	0	0	0	0	0	0	5	0	0	0	0	12	5	0	7	0	10	0	12	0	0	8	0	0	0	0	0	0	0	0	0	0	0	0
OTU0952	0	0	0	0	0	0	0	0	0	0	0	0	0	0	0	0	0	0	0	0	0	0	0	0	0	0	8	0	28	0	0	0	0	0	0	23	0	0	0	27	0	0	0	0	0	56	0	0	0
OTU0953	0	0	0	0	0	0	0	0	0	0	0	0	0	0	0	0	0	0	0	0	0	4	0	0	7	0	0	0	0	0	0	0	0	0	0	0	0	0	0	0	0	0	0	0	0	0	0	0	0
OTU0954	0	0	0	0	0	0	0	0	0	0	0	0	0	0	0	0	0	0	0	0	0	0	0	0	0	0	0	0	0	0	0	0	0	0	0	0	0	4	0	0	0	0	0	0	0	18	0	0	0
OTU0955	0	0	0	0	0	0	0	0	0	0	0	0	0	0	0	0	0	0	0	0	0	0	0	0	0	0	0	0	0	0	0	0	0	0	0	0	0	0	0	0	0	0	0	0	0	59	0	0	0
OTU0956	0	17	0	0	0	0	0	0	0	0	0	0	0	0	0	0	0	0	0	0	0	17	26	0	18	18	18	26	18	34	14	0	14	11	0	19	16	0	37	45	0	0	0	0	0	0	0	0	0
OTU0957	0	0	0	0	0	14	0	0	0	0	38	43	0	0	0	0	0	0	0	0	17	11	12	0	0	6	0	0	0	17	13	0	0	18	0	0	0	0	20	18	0	0	0	0	0	0	0	0	0
OTU0958	0	0	0	0	0	0	0	0	0	0	0	0	0	0	0	0	0	0	0	0	0	32	0	0	0	3	10	0	0	17	0	0	0	11	0	0	0	0	0	0	0	0	0	0	0	0	0	0	0
OTU0959	0	0	0	0	0	0	0	0	0	0	0	0	0	0	0	0	0	0	0	0	0	0	0	0	0	0	0	0	5	0	0	0	0	0	0	0	0	21	0	0	0	0	0	0	0	0	0	0	0
OTU0960	0	0	0	0	0	0	0	0	0	0	0	0	0	79	31	0	0	64	150	0	38	0	0	0	27	0	0	0	0	0	21	27	0	77	48	0	0	0	54	0	0	4249	638	550	145	0	0	128	0
OTU0961	0	0	0	0	0	0	0	0	0	0	0	0	0	0	0	0	0	0	0	0	0	0	0	0	0	0	0	0	0	0	0	0	10	0	0	9	0	0	6	0	0	0	0	0	0	0	0	0	0
OTU0962	0	0	0	0	0	0	0	0	0	0	0	0	0	0	0	0	0	0	0	0	0	23	0	0	0	0	0	0	37	0	21	0	23	19	0	30	0	0	0	0	0	0	0	0	0	0	0	0	0
OTU0963	18	0	0	0	0	0	29	0	0	0	48	0	0	0	0	0	0	0	0	0	21	30	0	0	0	0	11	0	0	16	31	0	0	0	0	0	0	0	0	0	0	0	0	9	0	0	0	0	0
OTU0964	0	0	0	0	0	0	0	0	0	0	0	0	0	0	0	0	0	0	0	0	0	0	0	0	0	0	0	0	0	0	0	0	0	0	0	0	0	0	0	0	0	0	40	0	0	0	0	0	35
OTU0965	0	0	0	0	0	0	0	0	0	0	0	0	0	0	0	0	0	0	0	0	0	0	0	0	0	0	0	0	0	0	0	0	0	0	0	0	0	0	0	0	72	0	0	0	16	0	7	0	0
OTU0966	0	0	0	0	26	0	0	0	0	0	0	0	0	0	0	0	0	0	0	0	0	0	0	0	0	0	0	0	0	0	0	0	0	2	0	0	0	0	0	0	0	0	0	0	0	0	0	0	0
OTU0967	0	0	0	0	0	0	0	0	0	0	0	0	0	0	0	0	0	0	0	0	17	14	0	0	11	16	0	13	10	0	0	10	0	0	0	0	0	0	0	9	0	0	0	0	0	0	0	0	0
OTU0968	0	0	0	0	0	0	0	0	0	0	0	0	0	0	0	0	0	0	0	0	0	0	0	0	0	20	0	0	0	0	0	0	0	0	0	0	0	0	0	9	0	0	0	0	0	0	0	0	0
OTU0969	76	0	0	0	0	0	0	0	0	0	0	0	0	0	0	0	0	0	0	0	25	57	51	32	0	34	44	22	46	43	19	32	20	24	37	42	47	28	32	42	0	65	0	0	0	0	0	0	0
OTU0970	0	0	0	0	0	0	0	0	0	0	0	0	0	0	0	0	0	0	0	9	0	9	6	0	11	0	0	0	0	0	0	0	0	0	14	7	4	8	8	27	0	0	0	0	0	0	0	0	0
OTU0971	0	14	0	0	0	0	0	0	0	0	75	0	0	0	0	0	0	0	0	0	0	0	0	0	0	0	20	0	0	0	0	0	0	14	0	0	0	0	0	0	0	0	44	0	0	0	0	0	0
OTU0972	0	0	0	0	0	0	0	0	0	0	0	0	0	0	0	0	0	0	0	0	14	0	0	0	0	0	0	0	0	0	0	0	12	0	0	0	0	0	0	8	0	0	0	0	0	0	0	0	0
OTU0973	0	0	0	0	0	0	0	0	0	0	0	0	0	0	0	0	0	0	0	0	6	0	0	0	0	16	0	0	0	0	0	0	0	0	0	0	0	0	0	0	0	0	0	0	0	0	0	0	0
OTU0974	0	0	0	0	86	0	0	0	0	0	0	0	0	0	0	0	0	0	0	0	0	0	0	0	0	0	0	0	0	0	0	0	0	0	0	0	0	0	0	6	0	0	0	0	0	0	0	0	0
OTU0975	0	0	0	0	0	0	0	0	0	0	0	0	0	0	0	0	0	0	0	0	0	0	0	0	12	0	22	7	22	8	0	0	14	12	0	12	12	0	0	0	0	0	0	0	0	0	0	0	0
OTU0976	0	0	0	0	10	0	0	0	0	0	0	0	0	0	0	0	0	0	0	0	0	0	0	0	0	0	0	0	0	0	0	0	0	0	0	7	0	0	0	0	0	0	0	0	0	0	0	0	0
OTU0977	0	0	0	0	0	0	0	0	0	0	0	0	0	0	0	0	0	0	0	0	0	0	0	0	0	0	0	17	0	0	0	0	0	0	0	0	0	0	21	0	0	0	0	21	18	267	7	0	0
OTU0978	0	0	0	0	0	0	0	0	0	0	0	0	0	0	0	0	0	0	0	0	38	52	37	33	51	56	48	50	45	54	0	23	28	40	31	44	56	63	55	50	0	0	0	0	0	0	0	0	0
OTU0979	0	0	0	0	0	0	0	0	0	0	0	0	0	0	0	0	0	0	0	0	0	0	0	0	0	0	0	0	0	0	0	0	0	0	0	0	0	0	0	0	0	0	0	0	0	0	0	0	0
OTU0980	0	39	9	0	29	0	0	0	0	0	0	10	0	0	0	0	0	14	0	0	0	0	0	0	0	0	0	0	0	0	0	0	4	0	0	0	0	0	0	0	64	0	0	0	0	0	6	0	15
OTU0981	0	0	0	0	0	0	0	0	0	0	0	0	0	0	0	0	0	0	0	0	18	0	15	14	17	8	19	10	10	20	0	16	24	16	0	16	15	22	23	23	0	0	0	0	0	0	0	0	0
OTU0982	0	0	0	0	0	0	0	0	0	0	0	0	0	0	25	0	0	0	0	0	10	22	16	0	10	0	12	0	14	8	0	0	0	0	10	0	10	0	7	0	0	0	0	0	0	0	0	0	0
OTU0983	0	28	0	0	0	20	0	0	0	0	0	0	0	0	0	0	0	0	0	0	0	0	0	0	0	0	0	0	0	0	0	0	0	0	0	0	0	0	0	0	40	0	0	0	0	0	0	0	0
OTU0984	0	0	0	0	0	0	0	0	0	0	0	0	0	0	0	0	0	0	0	0	0	0	0	15	0	0	29	31	0	0	0	0	0	0	42	0	0	0	0	29	0	0	0	14	0	0	0	0	0
OTU0985	0	0	0	0	0	0	0	0	0	10	0	158	56	0	41	43	0	24	0	28	27	45	0	16	28	43	0	20	0	0	0	49	0	10	0	0	37	0	33	35	0	13	0	0	0	0	13	0	0
OTU0986	0	0	0	0	0	0	0	0	0	0	0	0	0	0	0	0	0	0	0	0	0	0	0	0	0	63	0	0	92	79	0	0	0	0	0	0	0	0	0	100	0	0	0	0	0	0	0	0	0
OTU0987	0	0	0	0	0	0	0	0	0	0	0	0	0	0	0	0	0	0	0	0	11	4	0	11	0	11	0	15	15	0	0	0	0	0	0	0	0	5	15	0	0	0	0	0	0	0	0	0	0
OTU0988	0	0	0	0	0	0	0	0	0	0	0	0	0	0	0	0	0	0	0	0	0	0	5	0	0	0	0	7	0	0	0	5	0	0	0	0	0	0	0	0	0	0	0	0	0	0	0	0	0
OTU0989	0	0	0	0	0	0	0	0	0	0	0	0	0	0	7	0	0	0	0	0	0	28	23	20	0	16	26	12	0	0	37	108	74	31	20	0	18	43	29	27	21	0	16	13	0	67	0	0	0
OTU0990	0	0	0	0	0	15	0	0	0	21	0	0	16	0	0	0	0	0	13	0	0	0	0	0	0	0	0	0	0	0	0	0	0	0	9	0	0	7	0	0	0	0	0	0	3	0	0	0	0
OTU0991	0	0	0	0	0	0	0	0	0	0	0	0	0	0	0	0	0	0	0	0	0	0	0	0	0	0	0	0	0	0	0	0	0	0	0	0	0	0	0	0	0	0	0	0	24	0	0	0	0
OTU0992	0	0	0	0	0	0	0	0	0	0	0	0	0	0	0	0	0	0	0	0	0	0	0	0	13	0	0	0	0	0	0	0	15	0	0	0	0	0	0	14	0	0	0	0	0	0	0	0	0
OTU0993	0	0	0	19	0	0	0	0	0	12	0	0	0	0	0	0	0	0	0	0	0	0	11	0	9	0	0	0	8	0	0	0	0	9	0	15	0	0	8	0	0	7	0	0	0	0	0	0	0
OTU0994	0	0	0	0	0	0	0	0	13	0	0	0	0	0	0	0	0	0	0	0	0	0	0	0	0	0	0	0	0	0	0	0	0	0	0	0	0	0	0	15	0	0	0	0	0	0	0	0	0
OTU0995	0	0	0	0	0	0	0	0	0	0	0	0	0	0	0	0	0	0	0	0	0	30	0	0	0	7	7	0	5	0	0	0	0	0	11	0	15	0	0	0	0	0	0	0	0	0	0	0	50
OTU0996	0	0	0	0	0	0	0	0	0	0	0	0	0	0	0	0	0	0	0	21	28	0	22	0	10	0	31	27	0	0	0	0	37	0	0	32	0	11	31	27	0	14	0	0	0	0	0	0	0
OTU0997	0	0	0	0	0	0	0	0	0	0	0	0	0	0	0	0	0	0	0	0	0	17	0	0	16	0	0	6	13	0	0	0	0	17	0	0	17	0	19	0	0	0	0	0	0	0	0	0	0
OTU0998	0	0	0	0	0	0	0	0	0	0	0	0	0	21	0	0	0	0	0	0	0	0	0	0	0	0	0	0	0	0	0	0	0	0	0	0	0	0	9	0	0	0	0	0	0	0	0	0	0
OTU0999	0	0	0	0	0	0	0	0	0	0	0	0	0	0	0	0	0	0	0	0	0	0	0	5	0	5	0	0	0	0	0	0	0	0	0	0	0	0	0	7	0	0	0	0	0	0	0	0	0
OTU1000	0	0	0	0	0	0	0	0	0	0	0	0	0	0	0	0	0	0	0	22	0	0	0	0	0	0	0	0	0	0	0	7	0	0	0	0	0	0	0	0	0	0	0	0	0	0	0	0	0
OTU1001	0	0	0	0	0	0	0	0	0	0	0	0	0	0	0	0	0	0	0	0	0	0	0	0	0	0	0	0	0	3	0	0	0	0	0	0	0	0	0	0	0	0	0	0	0	0	0	0	0
OTU1002	0	0	0	0	0	0	0	0	0	0	0	0	0	0	0	0	0	0	0	0	13	26	13	0	19	17	15	9	32	33	0	21	17	0	0	16	26	23	0	25	0	0	0	0	0	0	0	0	0
OTU1003	0	0	0	0	0	0	0	0	0	0	0	0	0	0	0	0	0	0	0	0	0	0	0	0	0	0	0	0	0	0	0	0	0	0	0	0	0	0	0	28	0	0	19	0	0	0	0	0	0
OTU1004	0	0	0	0	0	0	0	0	0	15	0	0	0	0	0	0	0	0	12	11	0	0	0	0	0	0	0	0	8	0	0	10	4	0	0	0	0	0	0	0	0	0	9	0	0	0	0	0	0
OTU1005	0	0	0	0	0	0	0	0	0	0	0	0	0	0	0	0	0	0	0	0	0	0	0	0	0	0	0	11	0	16	0	0	23	0	0	0	0	0	0	0	0	0	0	0	0	0	0	0	0
OTU1006	0	0	0	0	0	0	0	0	0	0	0	0	0	0	0	0	0	0	0	0	0	0	0	9	0	0	0	0	0	0	0	0	0	0	0	0	0	0	0	0	0	0	0	0	0	0	0	0	0
OTU1007	0	9	0	0	0	0	0	0	0	6	0	0	0	0	19	0	0	0	0	0	0	0	0	0	0	0	0	0	0	0	0	0	0	0	0	0	0	0	0	0	0	0	0	0	0	0	0	5	0
OTU1008	0	0	0	0	0	0	0	0	0	0	0	0	0	17	83	0	0	0	0	60	44	91	54	79	0	64	61	0	94	31	0	32	0	50	81	0	20	39	28	47	41	0	14	0	0	14	0	0	0
OTU1009	0	0	0	0	0	0	0	0	0	0	0	0	0	0	0	0	0	0	0	0	0	0	0	0	0	0	0	0	0	0	15	0	0	0	0	0	15	8	0	0	0	0	0	0	0	0	0	0	0
OTU1010	0	0	0	0	0	0	0	0	0	0	0	0	0	0	0	0	0	0	0	0	0	0	0	6	3	0	4	15	0	5	7	0	11	6	6	8	0	0	0	5	0	0	0	0	0	0	0	0	0
OTU1011	0	0	0	0	0	0	0	0	0	0	0	0	0	0	0	0	0	0	0	0	0	0	0	0	15	0	15	0	19	7	0	0	15	23	15	25	0	25	11	15	0	7	0	0	0	0	0	0	0
OTU1012	0	0	0	0	0	0	0	0	0	0	0	0	0	0	0	0	0	0	0	0	0	0	44	0	0	0	0	0	0	0	25	0	0	0	0	0	0	0	0	0	0	0	44	0	0	46	0	22	0
OTU1013	0	0	0	0	0	0	0	0	0	0	0	0	0	0	0	0	0	0	0	0	0	7	0	6	0	0	0	0	6	0	0	0	5	7	0	0	0	11	0	0	0	0	0	0	0	0	0	0	0
OTU1014	0	0	0	0	0	0	0	0	0	0	0	0	0	0	0	0	0	0	0	0	0	0	0	0	0	0	0	0	0	0	0	11	0	0	0	0	0	21	0	0	0	0	0	0	0	0	0	0	13
OTU1015	0	0	0	0	0	0	0	0	0	0	0	0	0	0	0	0	0	0	0	0	0	0	0	0	0	0	18	0	0	0	0	0	0	0	0	0	5	0	0	0	0	0	0	0	0	0	0	0	0
OTU1016	0	0	0	0	0	0	0	0	0	0	0	0	0	0	0	0	0	0	0	0	0	0	52	41	0	0	0	34	0	0	35	21	62	55	0	44	44	49	94	56	0	0	96	0	0	371	0	0	23
OTU1017	0	0	0	0	0	0	0	0	0	0	0	0	0	0	0	0	0	0	0	0	0	0	0	0	0	0	0	0	0	0	0	0	10	0	0	5	0	0	0	0	0	0	0	0	0	0	0	0	0
OTU1018	0	0	0	0	0	0	0	0	0	0	0	0	0	0	0	0	0	0	0	0	0	0	0	0	0	0	0	0	0	0	0	0	0	0	0	0	0	0	18	0	0	0	0	0	0	0	0	0	0
OTU1019	0	9	0	0	0	0	0	0	0	0	0	0	0	0	0	0	0	0	0	0	131	48	44	22	0	0	107	22	0	22	16	0	0	0	0	0	0	0	0	20	0	0	0	0	0	0	0	0	0
OTU1020	57	0	0	0	0	0	0	0	0	0	0	0	0	0	0	0	0	0	0	0	0	0	5	0	0	0	0	0	0	0	0	0	0	0	0	0	0	0	0	0	0	0	0	0	0	0	0	0	0
OTU1021	0	0	0	0	0	0	0	0	0	0	0	0	0	0	0	0	0	0	0	0	0	0	0	0	0	0	0	0	0	0	0	0	0	0	0	0	0	0	0	0	0	0	8	0	0	117	0	0	0
OTU1022	0	0	0	0	70	0	0	0	0	0	0	0	0	0	0	0	0	0	0	5	58	15	17	24	26	29	25	0	10	43	50	11	27	155	21	34	28	33	76	24	0	0	0	0	0	0	0	0	0
OTU1023	0	0	0	16	0	0	0	0	0	0	23	15	0	0	0	0	0	0	0	0	0	17	0	0	0	0	0	0	0	18	37	8	0	0	5	46	41	0	16	12	0	0	0	0	0	41	0	0	0
OTU1024	0	0	0	0	13	0	0	0	0	0	0	0	0	0	0	0	0	0	0	33	0	0	0	0	3	0	0	33	39	59	0	34	0	0	0	0	0	0	31	0	0	0	44	0	0	0	0	17	0
OTU1025	0	0	0	0	0	0	0	0	0	0	0	13	0	0	0	0	0	0	0	0	14	0	0	0	25	0	14	14	17	13	0	17	16	0	18	27	21	7	0	19	0	0	0	0	0	0	0	0	0
OTU1026	0	0	0	0	7	0	0	0	0	0	0	0	4	0	0	0	0	0	0	0	0	0	0	0	0	0	0	0	0	0	0	0	0	0	0	0	0	0	0	0	0	0	0	0	0	0	0	0	0
OTU1027	0	0	0	0	21	0	0	0	0	0	0	0	0	0	0	0	0	0	0	0	0	0	0	0	0	0	0	0	0	20	0	0	0	0	0	20	0	0	0	0	0	0	0	0	0	0	0	0	0
OTU1028	0	0	0	0	0	0	0	0	0	0	0	0	0	0	0	0	0	0	0	0	0	0	0	0	0	0	0	0	10	8	0	0	0	0	0	0	0	0	0	0	0	0	0	0	0	0	0	0	0
OTU1029	0	0	0	0	0	0	0	0	0	0	0	0	0	0	0	6	0	0	0	0	27	0	0	0	0	0	0	0	0	0	0	8	0	0	0	0	0	12	0	0	0	0	0	0	0	23	0	0	0
OTU1030	0	0	0	0	0	0	0	0	0	0	0	0	0	0	0	0	0	0	0	0	0	0	9	0	0	0	8	0	9	0	0	0	0	0	0	0	0	0	0	0	0	0	0	0	0	0	0	0	0
OTU1031	0	0	0	15	0	0	0	0	0	0	0	0	0	0	0	0	0	0	0	0	0	0	0	0	0	0	0	0	0	0	0	0	0	0	0	0	0	0	0	0	0	7	0	0	0	0	0	0	0
OTU1032	0	0	0	0	0	0	0	0	0	0	0	0	0	0	0	0	0	0	0	0	0	0	0	0	0	0	14	14	0	6	0	0	9	0	0	7	0	17	0	0	0	0	0	0	0	0	0	0	0
OTU1033	0	0	0	0	0	0	0	0	0	0	0	0	0	0	0	0	0	0	0	0	0	3	0	0	0	0	0	0	0	0	0	0	0	4	0	0	0	0	4	0	0	0	0	0	0	0	0	0	0
OTU1034	0	0	0	0	0	0	0	0	0	0	0	0	0	0	0	0	0	0	0	0	0	0	0	0	0	0	5	0	6	9	0	0	0	0	0	0	0	0	0	0	0	0	0	0	0	0	0	0	0
OTU1035	41	0	0	0	0	0	0	0	0	0	0	0	0	0	0	0	0	0	0	0	0	0	0	0	0	0	0	0	0	0	0	0	0	0	23	0	0	0	0	0	0	0	0	0	0	0	0	0	0
OTU1036	0	0	0	0	0	0	0	0	0	0	0	0	0	0	0	0	0	0	0	0	0	0	0	0	0	0	0	0	0	0	0	0	0	0	0	0	0	0	17	10	0	0	0	0	0	0	0	0	0
OTU1037	0	0	0	0	0	0	0	0	0	0	0	0	0	0	0	0	0	0	0	0	0	0	0	0	0	0	0	0	0	0	0	0	0	0	0	14	0	7	0	0	0	0	0	0	0	0	0	0	0
OTU1038	0	0	0	0	0	0	0	0	0	0	0	0	0	0	0	0	0	0	0	0	47	0	0	0	0	0	33	0	0	0	0	0	0	0	0	19	0	0	0	0	0	0	0	0	0	0	0	0	0
OTU1039	0	0	0	15	0	0	0	0	0	0	0	0	0	0	0	0	0	0	0	0	0	0	0	0	0	0	0	0	0	0	0	0	0	0	0	0	6	0	0	0	0	0	0	0	0	0	0	0	0
OTU1040	0	0	0	0	0	0	0	0	0	0	0	0	0	0	0	0	0	0	0	0	5	0	0	0	0	0	0	0	0	0	11	0	13	10	0	17	17	10	12	0	0	0	0	0	0	0	0	0	0
OTU1041	0	0	0	62	20	68	0	14	53	69	0	0	15	0	0	34	14	0	0	0	0	0	0	0	0	0	0	0	0	0	0	0	0	0	0	0	0	0	0	0	29	0	0	0	0	0	30	20	108
OTU1042	0	0	0	0	0	0	0	0	0	0	0	0	0	0	0	0	0	0	0	0	0	0	3	0	0	0	0	0	6	0	0	0	0	0	0	0	4	6	0	0	0	0	0	0	0	0	0	0	0
OTU1043	0	0	0	0	0	0	0	0	0	0	0	0	0	0	0	0	0	0	0	0	40	18	0	0	0	27	0	35	0	21	0	0	0	0	9	0	0	0	9	0	0	0	10	0	22	15	0	0	0
OTU1044	0	0	0	0	0	0	0	0	6	0	0	0	0	0	0	0	0	0	0	0	0	0	0	0	0	0	0	0	0	0	0	0	0	0	0	0	0	0	0	0	0	0	0	0	0	0	0	0	0
OTU1045	0	0	0	0	0	0	0	0	0	0	0	0	0	0	0	0	0	0	0	0	20	25	0	12	16	19	9	40	20	10	0	0	19	12	22	12	30	39	20	25	0	0	0	0	0	0	0	0	0
OTU1046	0	0	0	0	0	0	0	0	0	0	0	0	0	0	0	0	0	0	0	0	19	15	0	15	26	0	0	0	15	20	0	25	19	0	0	17	17	0	19	30	0	0	15	0	0	0	0	0	0
OTU1047	0	0	0	0	0	0	0	0	0	0	0	0	0	0	0	0	0	0	0	0	0	0	0	0	0	0	0	0	0	0	0	0	0	0	0	0	4	0	0	0	0	0	0	0	0	0	0	0	0
OTU1048	0	0	0	0	0	0	0	0	0	0	0	0	0	0	0	0	0	0	0	0	0	0	0	0	0	9	0	0	0	0	0	0	6	0	0	0	0	0	0	0	0	0	0	0	0	0	0	0	0
OTU1049	0	0	0	0	0	0	0	0	0	0	0	0	0	0	0	0	0	0	0	0	0	0	0	0	0	0	5	0	0	7	0	0	0	0	0	0	0	11	0	0	0	0	0	0	7	0	0	0	0
OTU1050	0	0	0	0	0	0	0	0	0	0	0	0	0	0	0	0	0	0	0	0	0	0	0	0	0	0	0	8	0	0	0	0	0	0	0	0	0	0	0	0	0	0	0	0	0	0	0	0	0
OTU1051	0	0	0	0	0	0	0	0	0	0	0	0	0	0	0	0	0	0	0	0	0	0	0	0	0	0	0	0	14	0	0	0	0	0	0	0	0	0	0	0	0	0	9	0	0	0	0	0	0
OTU1052	0	0	0	0	0	9	0	0	0	0	0	0	0	0	0	0	0	0	0	0	0	0	0	0	0	0	0	0	0	0	0	0	0	0	0	0	0	0	0	0	0	0	0	0	0	0	0	0	0
OTU1053	0	0	0	0	0	0	0	0	0	0	0	0	0	0	0	0	0	0	0	0	0	10	8	0	0	7	0	0	10	5	0	0	0	0	0	0	0	0	10	0	0	0	0	0	0	0	0	0	0
OTU1054	0	0	0	0	0	0	0	0	0	0	0	0	0	0	0	0	0	0	0	0	10	0	12	0	0	0	17	0	7	0	0	11	0	10	6	17	0	32	10	15	0	0	5	0	0	0	0	0	0
OTU1055	0	0	0	0	0	0	0	0	0	0	0	0	0	0	0	0	0	0	0	0	0	0	0	0	4	0	0	4	0	0	0	0	16	0	0	0	0	5	0	0	0	0	0	0	0	0	0	0	0
OTU1056	0	0	0	0	0	0	0	0	0	0	0	0	0	0	0	0	0	0	0	0	3	0	0	0	8	0	0	0	0	0	0	0	0	0	0	0	0	0	0	6	0	0	0	0	0	0	0	0	0
OTU1057	0	0	0	25	0	0	0	0	0	0	0	0	0	0	0	4	0	0	0	0	0	0	0	0	0	0	0	0	0	0	0	0	0	0	0	0	0	0	0	12	0	0	0	0	0	0	0	0	0
OTU1058	0	0	0	0	0	0	0	0	0	0	0	0	0	0	0	0	0	0	0	0	47	0	60	75	52	74	56	70	45	74	0	36	94	0	64	70	68	83	55	74	0	0	0	0	0	0	0	0	0
OTU1059	52	0	0	0	0	0	0	0	4	0	64	14	0	0	14	0	0	44	0	13	31	60	26	0	0	14	16	37	45	39	10	7	19	24	12	11	15	24	18	8	0	0	0	28	0	0	0	0	0
OTU1060	0	0	0	0	0	0	0	0	0	0	9	0	0	0	0	0	0	0	0	0	0	0	0	0	0	0	0	0	0	0	0	0	0	0	0	0	0	0	0	0	0	4	0	0	0	0	0	0	0
OTU1061	0	0	0	0	0	0	0	0	0	0	0	0	0	0	0	0	0	0	0	0	0	0	0	4	0	0	0	0	0	0	0	0	0	0	0	22	0	0	0	0	0	0	0	0	0	0	0	0	0
OTU1062	0	0	0	0	0	0	0	0	0	0	0	0	0	0	13	0	0	0	0	0	0	0	38	0	0	0	0	0	0	0	0	0	0	0	0	0	0	0	0	0	0	0	0	0	0	0	0	0	0
OTU1063	0	0	0	0	0	0	0	0	0	22	0	0	0	0	0	0	0	0	0	0	0	8	0	0	0	0	0	0	0	0	0	0	0	0	0	7	0	0	0	0	0	0	0	0	0	0	0	0	0
OTU1064	0	0	0	0	0	0	0	0	0	0	4	0	0	0	0	0	0	0	0	0	0	0	0	0	0	0	0	0	0	0	13	0	0	0	0	0	0	0	0	0	0	0	0	0	0	0	0	0	0
OTU1065	0	0	0	0	0	0	0	0	0	0	0	0	0	0	0	0	0	0	0	0	0	7	0	0	21	0	25	0	33	0	0	0	12	0	0	0	0	14	0	0	0	0	0	0	0	0	0	0	0
OTU1066	0	0	0	0	0	0	0	0	0	0	0	13	0	0	0	0	0	0	0	0	0	8	0	0	0	9	0	4	6	0	0	0	0	12	0	0	0	2	0	0	0	0	0	0	0	0	0	0	0
OTU1067	0	0	0	0	0	0	0	0	0	0	0	0	0	0	0	0	0	0	0	0	28	36	35	0	32	34	70	0	25	30	19	77	22	37	23	0	59	61	30	75	0	0	0	0	0	0	0	0	0
OTU1068	0	0	0	17	0	0	0	0	0	0	0	0	20	0	53	0	0	9	0	0	0	0	11	0	18	0	0	31	15	0	15	0	0	0	0	68	0	33	0	19	0	0	7	44	0	0	0	0	0
OTU1069	0	0	0	0	0	0	0	0	0	0	0	0	0	0	0	0	0	0	0	0	23	0	0	38	16	0	0	0	20	0	0	16	0	32	21	0	0	0	0	31	0	0	5	0	0	0	0	0	0
OTU1070	0	0	0	0	0	0	0	0	0	0	0	0	0	0	0	0	0	0	0	0	0	0	5	0	9	0	0	0	0	0	0	0	0	0	0	0	0	0	0	0	0	0	0	0	0	0	0	0	0
OTU1071	0	0	0	0	0	0	0	0	0	0	0	0	0	0	0	0	0	0	0	0	0	0	30	0	22	0	0	0	0	0	0	11	16	34	12	24	0	0	26	0	0	0	0	0	0	0	0	0	0
OTU1072	0	0	0	0	0	0	0	0	0	0	0	0	0	0	0	0	0	0	0	0	0	0	0	0	0	0	0	0	0	0	0	0	0	0	0	0	0	0	0	37	0	0	0	0	0	0	0	0	0
OTU1073	0	0	0	0	0	0	0	0	0	0	0	0	0	12	0	0	0	0	0	54	0	13	0	0	0	0	0	0	14	0	0	0	13	0	0	0	7	0	0	0	0	0	0	0	0	0	0	0	0
OTU1074	0	0	0	0	0	0	0	0	0	0	0	0	0	0	0	0	0	14	0	0	0	0	0	0	0	0	0	0	0	0	0	0	0	0	0	0	0	0	0	0	0	0	0	0	0	0	0	0	0
OTU1075	0	0	0	0	0	0	0	0	0	0	0	0	0	0	0	0	0	0	0	0	3	0	0	0	0	0	0	0	0	0	0	0	0	0	0	0	0	15	0	0	0	0	0	0	0	0	0	0	0
OTU1076	0	0	0	0	0	0	0	0	0	0	0	0	0	0	0	0	0	0	0	0	0	0	0	0	0	0	0	0	0	0	0	0	0	0	0	16	0	9	0	0	0	0	0	26	0	0	0	0	0
OTU1077	0	0	0	0	0	0	0	0	0	0	0	0	16	0	0	0	0	0	0	0	14	0	0	0	0	0	0	0	0	66	0	0	0	0	0	0	0	9	0	0	0	0	0	0	0	0	0	0	0
OTU1078	0	0	0	0	0	0	0	0	0	0	0	0	0	0	0	0	0	0	0	6	0	0	0	0	0	0	0	0	0	0	0	0	0	0	0	7	0	0	5	0	0	0	0	0	0	0	0	0	0
OTU1079	0	0	0	0	0	0	0	0	0	0	0	0	0	0	0	0	0	0	0	0	0	0	0	0	0	0	0	0	0	0	0	0	0	0	17	15	0	0	0	19	0	0	0	0	0	0	0	0	0
OTU1080	0	0	0	0	0	0	0	0	0	0	0	0	0	0	0	0	0	0	0	0	28	21	0	57	63	50	26	0	39	0	0	0	47	0	70	0	32	30	0	0	0	0	0	0	0	0	0	0	0
OTU1081	0	0	0	0	0	0	0	0	0	0	0	0	0	0	0	0	0	0	0	0	0	0	0	0	0	0	0	0	0	7	0	12	0	0	0	0	0	8	0	0	0	0	0	0	0	0	0	0	0
OTU1082	0	0	17	0	0	0	0	0	0	0	0	0	0	0	0	0	0	0	0	0	0	0	0	0	0	0	0	0	0	0	0	0	0	0	0	0	0	0	0	0	0	0	0	0	0	20	0	13	0
OTU1083	0	0	0	0	0	0	0	0	0	0	0	0	0	0	0	0	0	0	0	10	33	0	32	7	0	42	16	31	23	32	28	19	27	33	0	33	45	57	15	22	0	0	0	0	0	0	0	0	0
OTU1084	0	0	0	0	0	0	0	0	0	0	0	0	0	18	0	0	0	0	0	7	0	7	6	0	0	0	0	0	0	14	0	11	7	17	10	0	4	0	14	0	0	0	21	0	0	0	0	0	0
OTU1085	0	0	0	0	0	0	0	0	0	0	0	0	0	0	0	0	0	0	0	0	11	0	0	0	0	0	0	0	0	0	0	0	0	0	0	0	0	0	0	23	0	0	0	0	0	0	0	0	0
OTU1086	0	0	0	0	0	0	0	0	0	0	0	0	0	0	0	0	0	0	0	0	0	23	0	22	23	22	0	21	0	0	0	0	0	0	24	0	0	0	0	0	0	0	0	0	0	0	0	0	0
OTU1087	0	0	0	82	0	0	100	43	44	97	0	65	43	0	0	45	0	0	60	0	58	147	71	74	27	58	166	85	0	94	52	0	48	51	0	0	86	0	0	0	153	33	0	0	0	131	0	38	0
OTU1088	0	0	0	0	0	0	0	0	0	0	0	0	0	0	0	0	0	0	0	0	0	0	0	0	0	0	0	5	0	0	0	0	0	0	0	5	0	0	0	0	0	0	0	0	0	0	0	0	0
OTU1089	0	0	0	0	0	0	0	0	0	0	0	0	0	38	0	0	0	0	14	0	0	0	0	0	0	0	0	0	0	0	0	0	0	0	0	0	0	0	0	0	0	0	0	0	0	0	0	0	0
OTU1090	0	0	0	10	0	0	0	0	0	0	0	0	0	0	0	0	0	0	0	0	0	0	0	0	0	0	0	0	0	0	0	0	0	0	0	0	0	0	0	0	0	9	13	23	0	0	0	0	14
OTU1091	0	0	0	0	0	0	0	0	0	0	0	41	70	0	59	0	0	0	0	0	13	24	28	0	16	19	38	17	29	19	0	33	18	20	0	22	20	24	22	30	0	0	0	0	0	0	0	65	0
OTU1092	0	0	0	0	0	0	0	0	0	0	5	0	0	0	0	0	0	0	0	0	0	0	0	11	0	0	0	0	19	0	10	0	0	0	0	0	0	14	5	0	0	0	0	0	0	0	0	0	0
OTU1093	0	0	0	0	0	0	0	0	0	0	0	0	0	0	0	0	0	0	10	0	0	10	0	0	0	0	0	0	0	0	0	0	0	10	0	0	0	0	0	0	0	0	0	0	0	0	0	0	0
OTU1094	0	0	0	0	33	17	0	0	0	0	0	0	0	9	0	0	0	0	0	0	0	0	0	0	0	0	0	0	0	0	0	0	0	0	0	0	0	0	0	0	0	0	0	5	0	0	0	0	0
OTU1095	0	0	0	0	17	0	0	13	0	0	0	42	98	73	21	22	0	0	70	112	45	39	27	0	23	59	67	0	63	63	23	35	0	0	22	55	48	41	30	62	0	18	0	0	0	0	0	43	0
OTU1096	0	0	0	0	0	0	0	0	0	0	0	0	0	0	0	0	0	0	0	0	0	0	0	0	0	0	0	0	0	0	0	0	0	0	0	0	0	0	7	0	30	0	0	0	2	0	0	0	0
OTU1097	0	0	0	0	0	0	0	0	0	0	0	0	0	0	0	0	0	0	0	0	18	0	35	0	0	0	24	0	0	32	0	0	0	0	0	0	0	0	0	0	0	0	0	0	0	0	0	0	0
OTU1098	0	0	0	0	5	0	0	0	0	0	0	0	0	0	0	0	0	0	0	0	32	72	42	5	40	37	71	0	37	67	51	25	0	76	43	79	108	70	77	116	0	0	0	0	0	0	0	0	0
OTU1099	0	0	0	0	0	0	0	0	0	0	0	0	0	0	13	0	0	0	0	0	0	21	0	0	0	0	0	0	0	0	0	0	0	0	0	0	0	0	17	0	0	10	0	0	0	0	0	0	0
OTU1100	0	0	0	0	0	0	0	0	0	0	0	0	0	0	0	0	0	0	0	0	0	0	0	0	0	0	0	0	8	0	0	0	6	0	0	0	0	0	0	0	0	0	0	0	0	0	0	0	0
OTU1101	0	0	0	0	0	20	0	0	0	0	0	0	0	0	0	0	0	0	0	0	0	0	0	0	0	0	0	4	0	0	0	0	0	0	0	0	0	0	0	5	0	0	0	0	0	0	0	0	34
OTU1102	74	107	0	93	90	119	64	0	109	147	59	127	90	143	163	0	0	0	246	170	362	314	338	199	254	243	339	202	223	469	154	160	128	135	103	177	155	234	133	178	130	113	206	79	118	52	71	88	212
OTU1103	0	0	0	0	0	0	0	0	0	0	0	0	0	0	0	0	0	0	0	0	0	0	0	0	0	0	0	0	0	0	0	0	0	0	0	0	0	0	0	0	0	0	0	11	18	27	0	0	0
OTU1104	0	0	0	11	0	0	0	0	0	0	0	0	0	0	0	0	0	0	0	0	0	0	0	0	0	0	0	0	0	2	0	0	0	0	0	0	0	0	0	0	0	0	0	0	0	0	0	0	0
OTU1105	0	0	0	0	0	0	0	0	0	0	27	0	0	0	0	0	0	0	0	0	0	0	0	0	0	0	0	0	0	0	0	0	0	0	0	0	0	0	0	0	0	0	0	0	0	0	0	0	0
OTU1106	0	0	0	0	0	0	0	0	0	0	0	0	0	0	0	0	0	0	0	0	7	0	4	0	7	8	10	9	0	12	0	0	10	7	0	0	0	6	14	12	0	0	0	0	0	0	0	0	0
OTU1107	0	0	0	0	0	0	0	0	0	0	0	0	0	0	0	0	0	0	0	0	0	10	3	0	0	0	5	0	0	0	0	0	0	0	0	0	9	0	0	0	0	0	0	0	0	0	0	0	0
OTU1108	0	0	0	0	0	0	0	0	0	0	0	0	0	0	0	0	0	0	0	0	0	5	0	0	0	0	0	0	0	0	0	0	0	0	0	0	0	0	0	0	0	0	0	0	0	0	0	0	0
OTU1109	0	0	0	0	0	0	0	0	0	0	0	0	0	0	0	0	0	0	0	0	0	0	0	0	0	0	11	0	0	9	0	0	8	0	0	0	0	0	0	0	0	0	0	0	0	0	0	0	0
OTU1110	0	0	0	0	0	0	0	0	0	0	0	0	0	34	0	0	0	0	0	0	0	18	0	0	0	0	0	0	0	0	0	0	0	0	0	0	0	0	0	0	0	0	0	0	0	0	0	0	0
OTU1111	0	0	0	0	0	0	0	0	0	0	0	0	0	0	0	0	0	0	0	0	0	0	0	0	0	0	0	0	0	0	0	0	0	0	0	0	0	0	0	0	0	0	0	0	0	26	0	0	0
OTU1112	0	0	0	0	0	0	0	0	0	0	0	0	0	0	0	0	0	0	0	0	0	0	0	0	0	0	6	5	0	0	0	0	0	0	0	0	0	0	0	0	0	0	0	0	0	0	0	0	0
OTU1113	0	0	0	0	0	0	0	0	0	0	0	0	0	0	0	0	0	0	0	0	0	0	0	0	0	13	6	0	0	0	0	0	0	0	0	0	0	0	0	0	0	0	0	0	0	0	0	0	0
OTU1114	0	16	0	0	0	0	0	0	14	0	0	0	0	59	0	0	0	0	0	21	291	293	289	257	423	390	460	217	509	398	59	418	343	404	382	263	234	383	397	508	71	0	0	0	6	64	0	0	0
OTU1115	0	0	0	0	0	0	0	0	0	0	0	0	0	0	0	0	0	0	0	0	16	28	23	33	30	0	26	19	19	18	0	0	0	23	12	27	28	28	27	25	0	0	0	0	0	0	0	0	0
OTU1116	47	0	0	0	29	0	0	0	22	0	0	0	0	79	0	0	0	0	72	113	28	0	0	0	14	0	0	33	22	8	0	0	3	0	0	0	0	0	0	0	0	0	0	0	15	0	0	0	25
OTU1117	0	0	0	0	0	0	0	0	0	0	0	0	0	0	0	0	0	0	0	0	0	0	0	0	0	0	0	0	0	0	0	7	0	0	0	6	0	15	9	0	0	0	0	0	0	0	0	0	0
OTU1118	0	0	0	16	28	0	0	0	0	0	27	35	20	14	20	15	0	60	23	0	0	0	0	0	0	0	0	0	28	0	0	0	9	0	0	0	0	0	0	15	0	0	0	0	0	0	0	0	0
OTU1119	0	0	0	0	0	0	0	0	0	0	0	0	0	0	0	0	0	0	0	0	0	0	0	0	0	0	0	0	13	0	0	0	0	0	0	0	0	0	0	0	0	0	10	0	18	86	20	12	0
OTU1120	54	0	41	10	0	0	12	0	13	11	174	0	10	0	0	62	0	0	0	0	50	58	26	0	49	39	166	110	28	37	0	47	0	22	14	0	56	0	17	30	81	56	0	96	0	0	0	4	0
OTU1121	0	0	0	0	0	0	0	0	0	0	0	0	0	48	0	0	0	0	23	0	173	59	170	171	316	352	292	257	251	238	75	279	197	127	173	347	156	282	163	249	19	44	0	31	20	0	0	0	0
OTU1122	0	0	0	0	0	0	0	0	18	0	100	0	18	88	0	0	0	0	0	37	55	0	0	27	0	0	26	37	30	28	0	66	51	55	53	39	117	55	69	40	0	0	28	0	0	0	0	0	0
OTU1123	0	0	0	0	0	0	0	0	9	0	0	113	14	0	0	0	0	28	33	0	0	0	13	0	0	0	0	0	6	0	0	0	7	9	0	8	16	0	0	13	0	0	0	0	0	0	0	0	21
OTU1124	0	0	0	0	0	0	0	0	0	0	0	0	0	0	0	0	0	0	0	0	0	0	0	0	0	0	0	0	0	0	0	6	0	0	0	0	0	0	0	21	0	0	0	0	0	0	0	0	0
OTU1125	0	0	0	0	0	0	0	0	0	0	0	5	0	0	0	0	0	0	0	0	0	0	0	0	0	0	0	0	0	0	0	0	0	0	0	0	0	0	0	0	0	0	0	0	0	0	0	0	0
OTU1126	0	0	0	0	0	0	0	0	0	0	0	0	0	0	0	0	0	0	0	0	0	0	0	0	0	0	0	0	0	0	0	0	0	0	0	0	0	0	0	0	22	0	0	0	0	58	0	0	0
OTU1127	0	0	0	0	0	0	0	0	0	0	0	0	0	0	19	0	0	0	0	0	0	0	0	0	0	0	0	0	0	0	0	0	0	0	0	0	0	0	0	0	0	0	0	0	10	0	0	0	0
OTU1128	0	0	0	0	0	0	0	0	0	0	0	0	0	0	0	0	0	0	0	0	34	0	55	22	43	31	28	26	37	43	22	22	0	0	30	0	0	16	40	0	0	0	0	0	0	0	0	0	0
OTU1129	0	0	0	0	0	0	0	0	0	0	0	0	0	0	0	0	0	0	0	0	22	0	0	0	36	0	24	0	0	23	0	0	0	0	23	0	23	43	32	48	0	0	0	0	0	0	0	0	0
OTU1130	0	0	0	0	0	0	0	0	0	0	0	0	0	0	0	0	0	0	0	0	0	0	0	0	0	0	0	0	0	0	0	0	0	3	0	5	7	0	0	0	0	9	0	0	0	0	0	0	0
OTU1131	0	0	0	0	0	0	0	0	0	0	0	0	0	0	0	0	0	0	0	0	0	0	0	0	0	0	0	0	0	0	0	0	0	0	0	0	0	20	0	0	0	0	0	0	0	0	0	0	0
OTU1132	0	0	0	0	0	0	0	0	0	0	0	0	0	0	0	0	0	0	0	0	0	0	0	0	0	0	0	0	0	0	0	0	0	0	0	0	0	0	0	0	0	0	19	0	0	0	0	0	0
OTU1133	0	0	0	0	0	0	0	0	0	0	0	0	0	0	0	0	0	0	0	0	0	0	0	0	0	0	0	0	0	0	0	0	0	0	0	0	0	0	0	0	0	0	24	0	0	43	0	0	0
OTU1134	0	0	0	0	0	0	0	0	0	0	0	0	0	0	0	0	0	0	0	0	0	0	13	0	0	35	0	15	0	0	0	18	0	14	0	22	12	8	9	13	0	0	0	0	0	0	0	0	0
OTU1135	0	0	0	0	0	0	0	0	0	0	0	0	0	0	0	0	0	0	0	0	0	0	0	0	0	0	0	0	0	0	0	0	0	0	0	0	0	0	0	0	0	0	0	0	0	0	0	0	0
OTU1136	10	0	0	0	0	0	0	0	0	0	0	0	0	0	0	0	0	0	0	0	22	27	31	0	13	13	13	0	19	32	28	0	6	30	8	0	0	23	0	0	0	0	0	0	7	0	0	0	0
OTU1137	0	0	0	0	0	0	0	0	0	0	0	0	0	0	0	0	0	0	0	0	12	0	0	0	0	0	0	0	19	0	0	0	17	10	0	15	14	17	10	20	0	0	0	0	0	0	0	0	0
OTU1138	0	0	0	0	0	0	0	0	0	0	0	0	0	0	0	0	0	0	0	0	0	0	0	0	0	0	0	0	11	0	0	0	0	0	0	0	0	10	0	0	0	0	0	0	0	0	0	0	0
OTU1139	0	0	0	0	0	0	0	0	0	0	0	0	0	0	0	0	0	0	0	0	0	0	0	0	0	0	0	0	0	0	0	0	0	0	0	0	0	0	0	0	0	0	20	0	0	83	0	0	0
OTU1140	0	0	0	0	0	0	0	0	0	0	0	0	0	0	0	0	0	0	0	0	0	14	0	21	0	0	0	0	10	0	21	0	0	0	0	0	0	0	0	0	0	0	0	13	0	0	0	0	0
OTU1141	0	0	0	10	0	0	0	0	0	0	0	0	0	0	0	0	0	0	0	32	11	0	0	0	0	0	0	13	0	0	0	0	0	0	0	0	0	0	0	22	0	0	0	0	0	0	0	0	0
OTU1142	0	0	0	0	0	0	0	0	0	0	0	0	0	0	0	0	0	0	0	0	0	0	14	0	0	0	0	0	0	0	0	0	0	0	0	12	0	0	0	11	0	0	0	0	0	0	0	0	0
OTU1143	0	0	0	0	0	0	0	0	0	0	0	0	0	0	0	0	0	0	0	0	0	0	0	0	0	0	0	0	0	0	0	0	14	0	0	0	0	0	14	0	0	0	0	0	0	0	0	0	0
OTU1144	0	0	0	0	0	0	0	0	0	14	0	0	0	0	0	0	0	0	0	0	0	0	0	0	0	0	0	0	0	36	0	0	0	0	0	0	0	0	0	0	0	0	0	25	0	0	0	0	0
OTU1145	0	0	0	0	0	0	0	0	0	0	0	0	0	0	0	0	0	0	0	0	8	0	0	11	10	0	14	5	0	0	0	0	7	6	0	0	10	8	0	0	0	0	0	0	0	0	0	0	0
OTU1146	0	0	0	0	0	0	0	0	0	0	0	0	0	0	0	0	0	0	0	0	0	0	0	0	0	17	0	9	0	0	0	0	0	0	14	10	0	0	0	0	0	0	0	0	0	0	0	0	0
OTU1147	0	0	0	0	0	0	0	0	0	0	0	0	0	0	0	0	0	0	0	33	0	0	0	0	0	26	0	0	0	0	0	0	0	0	0	20	0	20	0	0	0	0	0	0	0	0	0	0	0
OTU1148	0	0	0	0	0	0	0	0	0	0	0	0	0	0	0	0	0	0	0	0	0	0	13	0	0	0	36	0	33	39	0	0	25	19	0	0	24	37	24	55	0	0	0	0	0	0	0	0	0
OTU1149	0	0	0	0	0	0	0	0	0	0	0	0	0	0	0	0	0	0	0	0	0	0	0	0	30	0	0	0	30	14	0	16	0	0	0	0	0	29	0	0	0	0	20	0	0	0	0	0	0
OTU1150	0	0	0	0	0	0	0	0	16	0	6	0	0	0	0	0	0	0	0	0	0	0	0	0	0	0	0	0	0	0	0	0	0	0	0	0	0	0	0	0	0	0	0	0	0	0	0	0	21
OTU1151	0	0	0	0	0	0	0	0	0	0	0	0	0	0	0	0	0	0	0	0	0	0	0	0	0	0	0	0	0	0	0	0	0	0	0	0	0	0	0	0	0	0	0	0	0	75	0	0	0
OTU1152	0	0	0	0	0	0	0	0	0	0	7	0	0	0	0	0	0	0	0	0	0	0	0	0	0	0	0	0	0	0	0	0	0	0	0	0	0	19	0	11	0	0	0	0	0	0	0	0	0
OTU1153	0	0	0	0	0	0	0	0	0	0	0	0	0	0	0	0	0	0	0	0	0	0	0	0	0	0	0	0	0	0	0	0	0	0	0	0	0	0	0	0	0	0	0	0	0	0	0	0	0
OTU1154	0	0	0	0	0	0	0	0	0	0	0	0	0	0	0	0	0	0	0	0	0	0	0	0	0	0	0	0	0	0	0	0	0	0	0	0	0	0	0	0	19	0	10	0	0	0	22	0	0
OTU1155	0	0	0	10	0	0	0	0	0	0	0	0	0	0	0	0	0	0	0	0	0	50	0	35	0	0	0	0	0	0	52	36	27	0	33	43	50	53	0	23	0	0	41	0	0	125	0	0	0
OTU1156	0	0	0	0	0	0	0	0	0	0	0	0	0	0	0	0	0	0	0	15	12	12	10	16	7	0	0	8	9	0	13	29	0	0	0	11	0	0	20	0	0	8	0	0	0	0	0	0	0
OTU1157	0	0	0	0	0	0	0	0	0	0	0	0	0	0	0	0	0	0	0	0	0	0	0	0	0	0	0	0	0	0	0	0	0	0	0	0	0	0	0	0	0	0	0	0	0	45	0	0	0
OTU1158	0	0	0	0	0	0	0	0	0	0	0	0	0	0	0	0	0	0	0	0	0	0	7	0	18	15	21	8	12	14	0	0	12	0	0	11	6	12	15	19	0	0	0	0	0	0	0	0	0
OTU1159	0	0	0	0	0	0	0	0	0	0	0	0	0	0	0	0	0	0	0	0	0	0	0	0	0	0	0	0	0	0	0	0	0	0	0	0	0	0	0	0	0	5	0	0	11	0	0	0	0
OTU1160	0	0	0	0	0	0	0	0	0	0	0	0	0	0	0	0	0	0	0	0	0	0	0	0	0	0	9	0	0	0	0	0	0	0	0	0	0	0	8	0	0	0	0	0	0	0	0	0	0
OTU1161	0	0	0	0	0	0	0	0	0	0	0	0	0	0	0	0	0	0	0	0	0	0	0	0	0	0	0	0	0	9	14	7	0	55	0	0	2	0	7	0	0	0	0	0	0	0	0	0	0
OTU1162	0	0	5	0	7	0	0	0	22	0	12	40	29	0	17	0	0	16	29	26	10	20	0	6	0	13	22	0	10	9	7	14	16	10	11	10	13	8	0	13	0	0	0	15	0	0	0	0	0
OTU1163	0	0	0	0	0	0	0	0	0	0	0	0	0	0	0	0	0	0	0	0	0	0	0	0	8	0	0	0	0	7	0	0	0	0	0	0	0	0	0	0	0	0	0	0	0	0	0	0	0
OTU1164	0	0	0	0	78	0	0	0	0	0	0	0	0	0	0	0	5	0	0	0	0	37	0	0	0	0	42	0	0	54	0	0	0	0	0	0	0	0	0	0	0	0	0	0	0	0	0	0	0
OTU1165	0	26	770	0	47	0	0	0	0	0	87	0	0	0	0	0	0	0	0	0	0	28	73	0	0	64	79	0	0	106	25	40	145	0	0	0	0	0	68	0	0	0	0	0	89	0	0	0	0
OTU1166	0	0	0	0	0	0	0	0	0	0	0	0	0	0	0	0	0	0	0	0	54	61	52	37	44	70	55	65	102	58	42	72	67	48	64	65	71	111	89	105	0	0	0	0	0	0	0	0	0
OTU1167	4	0	13	0	0	0	0	0	0	0	0	0	0	17	0	0	0	0	0	0	8	38	11	17	7	18	18	0	6	17	20	16	0	67	0	8	0	23	25	0	0	29	16	0	0	0	0	0	0
OTU1168	0	0	0	0	0	0	0	0	0	0	0	0	0	0	0	0	0	0	0	0	0	0	0	0	0	0	0	14	11	11	0	0	0	0	0	0	0	0	0	0	0	0	0	0	0	0	0	0	0
OTU1169	0	23	0	0	0	0	0	0	0	0	0	0	0	0	0	0	0	0	0	0	0	0	0	0	0	0	0	0	0	0	0	0	0	0	0	0	0	0	0	0	0	0	0	0	8	0	0	0	0
OTU1170	0	0	0	0	0	0	0	0	0	0	0	0	0	0	0	0	0	0	0	0	0	0	0	0	0	0	0	0	0	0	0	0	0	66	0	0	0	0	0	0	0	0	14	0	0	67	0	0	0
OTU1171	0	0	0	0	0	0	0	0	0	0	0	0	0	7	0	0	0	0	0	0	0	27	11	0	0	6	0	9	17	23	20	0	0	0	0	8	7	0	14	0	0	8	0	4	0	0	0	0	0
OTU1172	0	0	0	0	0	23	0	0	0	0	0	0	0	0	0	0	0	0	0	0	0	35	24	0	0	0	0	25	22	31	0	24	0	34	34	0	35	53	0	0	74	0	60	0	0	34	635	0	0
OTU1173	0	0	0	0	0	0	0	0	0	0	0	0	0	0	0	0	0	0	0	0	0	0	0	0	0	0	0	0	0	0	0	0	0	0	0	0	0	0	0	6	0	0	0	0	0	69	0	0	0
OTU1174	0	0	0	0	0	0	0	0	0	0	0	0	0	0	0	0	0	0	0	0	0	0	0	0	3	0	0	4	6	0	0	0	0	0	0	0	0	0	0	0	0	0	0	0	0	0	0	0	0
OTU1175	0	0	0	0	0	0	0	0	0	0	0	0	0	0	0	0	0	0	0	0	0	0	0	0	0	0	0	0	0	0	0	11	0	0	0	0	0	0	0	10	0	0	0	0	0	0	0	0	0
OTU1176	0	0	0	0	0	0	0	0	0	0	0	0	0	0	0	0	0	0	0	0	0	0	4	0	0	0	0	0	0	0	0	0	0	0	5	0	5	0	0	0	0	0	0	0	0	0	0	0	0
OTU1177	0	0	0	0	0	0	0	0	0	0	0	0	0	0	0	0	0	0	0	0	0	0	0	0	0	0	0	0	0	0	0	0	0	0	0	0	0	0	0	0	0	0	0	0	0	61	0	0	0
OTU1178	0	0	0	0	0	0	0	0	0	0	15	0	0	14	0	0	0	0	0	0	28	32	32	0	0	0	18	0	0	30	0	0	0	0	0	13	0	31	25	34	0	29	0	0	0	0	0	0	0
OTU1179	0	0	0	0	0	0	0	0	0	0	0	0	0	0	0	0	0	0	0	0	0	1	0	21	0	0	0	0	0	34	0	31	0	37	0	0	0	0	0	0	0	0	15	0	0	74	0	0	0
OTU1180	0	0	0	0	0	0	6	0	0	0	0	0	0	0	0	0	0	0	0	0	0	0	0	0	0	0	50	0	0	0	0	0	0	0	0	0	0	0	0	0	0	0	0	0	0	0	0	0	0
OTU1181	0	0	0	0	0	0	0	0	0	0	0	0	0	0	0	0	0	0	0	0	0	0	0	0	0	0	0	0	0	0	0	0	0	0	0	0	7	4	0	0	0	0	0	0	0	0	0	0	0
OTU1182	0	0	0	0	0	0	0	0	0	0	0	0	0	0	0	0	0	0	0	0	0	0	0	0	0	0	0	0	16	0	0	0	0	0	0	28	0	0	0	0	0	0	0	0	0	0	0	0	0
OTU1183	0	0	0	0	0	0	0	0	0	0	0	0	0	0	0	0	0	0	0	9	0	0	0	0	0	0	13	0	0	0	0	11	12	0	0	0	0	0	0	0	0	0	0	0	0	0	0	0	0
OTU1184	0	0	0	0	0	0	0	0	0	0	0	0	0	0	0	0	0	0	0	0	0	0	0	0	0	17	0	0	0	0	0	0	0	0	0	0	0	0	0	0	0	0	15	0	0	0	0	0	0
OTU1185	0	0	0	0	0	0	0	0	0	0	0	0	0	0	0	0	0	0	0	0	11	21	16	19	15	11	11	15	24	19	0	0	15	20	18	16	0	9	15	20	0	0	0	0	0	0	0	0	0
OTU1186	0	0	0	0	0	0	0	0	0	0	0	0	0	0	0	0	0	0	0	0	23	10	0	5	0	0	0	0	0	13	0	0	0	29	13	0	15	0	27	0	0	16	0	0	0	0	0	0	0
OTU1187	0	0	0	0	0	0	0	0	0	0	0	0	0	0	0	0	0	0	0	0	60	51	133	163	12	152	0	0	0	159	200	0	0	163	0	105	0	0	116	0	0	0	7	0	0	0	0	0	0
OTU1188	0	0	0	0	0	0	0	0	0	0	0	0	0	0	0	0	0	0	0	0	0	0	15	0	0	8	0	0	0	0	0	0	19	0	0	16	14	11	0	0	0	0	0	0	0	0	0	0	0
OTU1189	0	0	0	0	0	0	0	0	0	0	0	0	0	0	0	0	0	0	0	0	3	0	0	20	0	0	0	6	0	0	0	0	0	0	0	0	0	0	0	0	0	0	0	0	0	0	0	0	0
OTU1190	0	48	0	0	0	0	0	0	0	0	0	0	0	0	0	0	0	0	0	0	0	0	0	0	0	0	0	0	0	0	0	0	0	0	0	0	0	0	0	0	0	0	0	0	0	6	17	0	0
OTU1191	0	0	0	0	0	0	0	0	0	0	0	0	0	0	0	0	0	0	0	0	0	10	0	0	0	0	0	0	0	0	0	0	0	0	0	0	0	11	0	9	0	0	0	0	0	0	0	0	0
OTU1192	0	0	0	0	0	0	0	0	0	0	0	0	0	0	0	0	0	0	0	0	0	0	0	0	0	0	0	0	0	0	0	0	0	0	0	0	0	0	0	0	0	0	0	0	0	0	0	0	0
OTU1193	0	0	0	0	0	0	0	0	0	0	0	0	0	0	0	0	0	0	0	0	0	0	0	0	0	0	0	0	0	0	0	0	0	0	0	0	0	0	0	0	0	0	0	0	0	56	0	0	0
OTU1194	0	0	0	0	0	0	0	0	8	0	35	0	0	19	0	0	0	0	0	0	34	41	25	42	21	16	51	15	21	51	0	0	0	42	0	46	53	81	14	69	0	0	75	246	0	0	0	0	0
OTU1195	0	0	0	9	0	0	0	0	0	0	0	0	0	0	0	0	0	0	0	0	0	0	0	0	0	0	0	0	0	0	0	0	0	0	0	0	0	0	0	0	0	0	0	0	0	0	0	0	0
OTU1196	0	54	0	0	0	0	0	0	13	42	27	0	0	140	0	14	0	0	49	124	106	124	114	90	116	67	146	105	91	206	112	79	100	153	64	60	80	146	215	147	17	0	114	0	0	0	0	0	0
OTU1197	0	0	0	0	0	17	0	0	0	0	0	0	0	0	18	0	0	0	0	0	0	0	0	0	0	0	0	0	0	0	0	0	0	0	0	0	0	0	0	0	0	0	0	0	0	0	0	0	0
OTU1198	15	0	0	0	0	0	0	0	0	0	0	0	0	0	6	0	0	0	0	57	0	0	0	0	0	0	0	0	0	0	0	0	0	0	0	35	0	0	28	0	24	0	121	0	17	115	11	0	0
OTU1199	0	0	0	0	23	0	0	0	0	0	0	0	0	0	0	0	0	0	0	0	0	0	0	0	6	0	0	7	0	0	0	0	17	0	0	23	4	0	16	14	0	0	0	0	0	0	0	0	0
OTU1200	0	0	0	0	0	0	0	0	0	0	0	0	0	0	0	0	0	0	0	0	4	0	0	0	0	0	0	0	0	0	0	0	10	0	0	0	0	11	0	0	0	0	0	0	0	0	0	0	0
OTU1201	0	0	0	0	0	0	0	0	0	0	0	79	33	0	37	0	0	61	0	0	0	0	0	0	15	0	0	9	0	0	0	0	0	0	0	0	0	0	13	0	6	0	5	0	0	0	0	0	0
OTU1202	0	0	0	0	48	0	0	0	0	0	0	0	0	0	0	0	0	0	0	0	0	11	0	0	0	0	0	21	0	0	0	0	18	0	12	0	0	0	0	22	0	0	0	0	0	0	0	0	0
OTU1203	0	0	0	0	0	0	0	0	0	0	0	0	0	0	0	0	0	0	0	0	0	0	0	0	0	0	0	12	0	0	0	0	0	9	0	0	0	0	0	0	16	0	0	0	0	0	0	0	0
OTU1204	0	0	0	0	0	0	0	0	0	0	0	0	0	0	0	0	0	0	0	0	0	0	0	0	0	0	0	0	19	16	0	0	0	13	0	17	0	15	0	0	0	0	0	0	0	0	0	0	0
OTU1205	0	0	0	0	0	0	0	0	0	9	0	0	0	0	0	0	0	0	0	0	17	33	22	22	20	18	26	26	24	35	19	32	33	31	27	25	0	0	26	32	0	0	0	0	0	0	0	0	0
OTU1206	0	0	0	0	0	0	0	0	0	0	0	0	0	0	0	0	0	0	0	0	0	0	0	0	0	0	0	0	0	0	0	0	0	0	0	0	0	0	0	0	19	0	0	0	20	94	16	0	0
OTU1207	0	0	0	0	0	0	0	0	0	0	0	0	0	0	0	0	0	0	0	0	0	0	0	0	0	0	0	0	0	0	0	0	0	0	0	0	0	0	0	0	0	0	0	0	7	0	0	0	0
OTU1208	0	0	0	0	0	0	0	0	0	0	0	0	0	0	0	0	0	0	0	0	0	0	0	0	0	0	18	0	0	12	0	0	0	0	0	0	0	0	0	0	0	0	0	0	0	23	0	0	0
OTU1209	0	0	0	0	0	0	0	0	0	0	0	0	0	0	0	0	0	0	0	0	13	0	0	0	0	0	0	0	0	0	0	0	0	0	0	0	0	0	0	27	0	0	0	0	0	0	0	0	0
OTU1210	0	0	0	0	27	0	0	0	0	0	0	11	0	0	0	0	0	0	0	31	0	0	0	0	0	0	0	0	0	0	0	0	0	0	0	0	0	0	0	0	0	0	0	0	0	0	0	0	0
OTU1211	0	0	0	0	0	0	0	0	0	0	0	0	0	0	0	0	0	0	0	0	0	0	0	0	0	0	0	0	0	12	0	0	0	24	0	0	0	0	0	0	0	0	0	0	0	0	0	0	0
OTU1212	0	0	0	0	0	0	0	0	0	0	0	0	0	0	0	0	0	0	0	0	0	0	0	0	0	0	0	0	3	0	0	0	0	0	0	0	0	0	0	0	0	0	0	0	0	0	0	0	0
OTU1213	0	0	0	0	0	0	0	0	0	0	0	0	0	0	0	0	0	0	0	0	0	0	0	0	0	0	0	0	0	0	0	0	0	0	0	0	0	0	0	0	0	0	0	0	0	0	0	0	0
OTU1214	0	0	0	0	0	0	0	0	0	0	0	0	82	0	0	0	0	0	0	0	0	0	0	0	0	0	0	0	0	0	0	0	0	17	0	0	0	0	0	0	0	0	0	0	0	0	0	0	24
OTU1215	0	0	0	0	0	14	0	9	0	8	0	0	0	0	16	0	0	0	91	0	0	0	0	0	0	0	0	0	0	0	0	0	0	0	0	0	0	0	0	12	0	0	0	0	0	0	4	0	0
OTU1216	0	0	0	0	0	0	0	0	0	0	0	0	0	0	0	0	0	0	0	0	29	63	31	52	57	46	55	44	33	43	0	0	37	16	35	40	70	54	36	79	0	0	0	0	0	0	0	0	0
OTU1217	0	0	0	0	0	0	0	0	0	0	0	0	0	0	0	0	0	0	0	0	0	0	0	0	0	0	0	0	0	0	0	0	0	0	0	0	0	0	0	11	0	0	0	0	0	0	0	0	0
OTU1218	0	0	0	10	0	0	0	0	0	10	0	0	0	0	0	0	0	0	0	0	0	0	0	0	0	0	0	0	0	0	0	0	0	0	0	0	0	0	0	0	0	0	0	0	0	0	0	0	0
OTU1219	0	0	0	0	0	0	0	0	0	0	0	0	0	0	0	0	0	0	0	0	0	0	9	0	0	0	0	0	0	0	0	6	0	0	0	0	8	0	0	0	0	0	0	0	0	0	0	0	0
OTU1220	0	0	0	0	0	0	0	0	0	0	0	0	0	0	0	0	0	0	0	0	0	0	0	0	0	0	8	0	0	0	0	0	0	0	0	0	0	0	0	0	0	0	0	0	0	22	0	0	0
OTU1221	0	0	0	0	0	0	0	0	0	0	0	0	0	0	0	0	0	0	0	0	9	8	0	0	15	0	5	0	0	0	0	0	24	13	15	0	0	6	0	9	0	0	0	0	0	0	0	0	0
OTU1222	0	0	0	0	0	0	0	0	0	0	0	0	0	0	0	0	0	0	0	0	0	0	0	0	0	0	18	0	0	12	0	0	0	13	0	0	0	0	0	0	0	0	0	0	0	0	0	0	0
OTU1223	0	0	0	0	0	0	0	0	0	0	0	0	0	0	0	0	0	0	0	0	67	167	120	124	80	112	131	170	149	127	94	145	134	142	156	91	216	58	154	167	0	0	15	15	0	0	0	0	0
OTU1224	0	0	0	0	0	0	0	0	0	0	20	0	0	0	0	10	0	21	0	0	3	0	0	0	0	0	5	0	0	0	5	0	0	0	0	0	0	0	15	0	0	0	0	0	0	0	0	0	0
OTU1225	0	0	0	0	0	0	0	0	0	0	0	0	0	0	0	0	0	0	0	0	0	0	0	0	0	0	0	7	0	0	0	5	0	0	0	0	0	0	0	0	0	0	0	0	0	0	0	0	0
OTU1226	0	0	0	0	0	0	0	0	0	0	0	0	0	0	0	0	0	0	0	0	0	20	0	0	0	0	0	0	0	0	0	0	0	0	0	0	14	0	0	0	0	0	0	0	0	0	0	0	0
OTU1227	0	0	0	0	0	0	0	0	0	0	0	0	0	0	0	0	0	0	0	0	16	0	0	0	0	0	0	0	0	0	0	0	0	10	0	0	0	0	0	0	0	0	0	0	0	0	0	0	0
OTU1228	0	0	0	0	0	0	0	0	0	0	0	0	0	0	0	0	0	0	0	0	0	0	0	0	0	0	0	0	0	0	0	0	0	0	0	0	0	0	0	0	0	0	40	0	0	0	0	0	0
OTU1229	0	5	0	41	0	0	0	0	0	34	0	0	59	0	0	0	0	24	0	0	23	0	15	17	0	19	33	0	0	22	0	0	0	51	0	0	0	0	0	0	33	0	0	0	0	0	0	0	64
OTU1230	0	0	0	0	0	0	0	0	0	0	0	0	0	0	0	0	0	0	0	0	0	0	0	0	0	12	9	20	22	12	0	0	14	0	0	0	0	0	0	0	0	0	0	0	0	0	0	0	0
OTU1231	0	0	0	0	0	13	0	0	0	0	0	0	0	0	0	0	0	0	0	0	0	0	0	0	0	0	0	0	0	0	0	0	0	0	0	0	0	0	0	0	0	0	0	0	0	0	0	0	0
OTU1232	0	0	0	0	0	0	0	0	0	0	0	0	0	0	0	0	0	0	0	0	0	8	0	0	0	0	0	7	6	0	0	0	0	0	0	0	0	0	0	0	0	0	0	0	0	0	0	0	0
OTU1233	37	0	0	0	0	0	53	0	0	0	69	0	0	0	0	0	0	27	0	0	0	0	0	0	0	0	30	0	0	0	0	86	0	0	0	0	0	0	0	0	0	0	0	0	11	0	13	0	0
OTU1234	0	0	0	0	12	0	0	0	0	6	6	0	0	0	0	0	0	0	0	0	26	33	30	28	77	35	27	39	42	37	0	0	66	36	0	30	26	0	31	42	0	0	5	0	0	0	0	0	0
OTU1235	0	0	0	0	0	0	0	0	0	0	0	0	0	0	0	0	0	0	0	0	0	0	0	0	0	0	0	0	0	0	0	0	0	0	0	0	0	0	0	0	0	0	14	0	0	23	0	0	0
OTU1236	0	0	0	0	0	0	0	0	0	0	0	0	0	0	0	0	0	0	0	0	0	0	0	5	0	0	0	0	0	0	0	0	16	0	0	0	0	0	13	0	0	0	0	0	0	0	0	0	0
OTU1237	0	0	0	0	0	0	0	0	0	0	0	0	0	0	0	0	0	0	0	31	0	0	0	0	0	0	0	0	0	0	0	0	0	0	0	0	0	0	12	0	0	0	0	0	0	0	0	0	0
OTU1238	0	0	0	0	0	0	0	0	0	0	0	0	0	0	0	0	0	0	0	0	0	7	18	0	0	10	11	12	11	7	0	19	16	0	6	22	0	6	9	22	0	0	0	0	0	13	0	0	0
OTU1239	11	0	0	19	0	12	0	0	0	0	0	0	0	0	0	0	0	0	0	0	0	0	35	26	37	0	0	35	33	49	38	67	0	47	48	59	0	0	57	0	0	0	0	11	0	0	0	0	0
OTU1240	0	0	0	0	0	0	0	0	0	0	0	0	0	34	0	0	0	0	28	0	0	0	0	0	0	0	0	0	0	0	0	0	0	0	0	0	0	0	0	0	0	0	0	0	0	0	0	0	0
OTU1241	0	0	0	0	0	0	0	0	0	0	0	12	0	0	0	0	0	0	0	0	12	0	0	0	0	0	0	0	0	0	0	0	0	0	0	0	0	0	0	0	0	0	0	0	0	0	0	0	0
OTU1242	16	0	0	6	0	13	0	0	0	14	0	72	0	0	0	0	0	0	36	31	0	0	12	0	0	17	17	10	0	0	0	0	0	0	0	0	0	0	10	0	0	6	0	0	0	0	4	0	0
OTU1243	0	0	0	0	0	0	0	0	0	0	0	0	0	0	0	0	0	0	0	0	0	0	0	0	0	0	0	0	0	0	0	0	0	0	0	0	13	0	0	0	0	0	0	0	0	0	0	0	0
OTU1244	0	0	0	0	0	0	0	0	0	0	0	0	0	0	0	0	0	0	0	0	0	0	0	0	0	0	0	0	0	0	0	0	0	0	6	6	8	0	12	9	0	0	0	0	0	0	0	0	0
OTU1245	0	0	0	0	0	0	0	0	0	0	0	0	0	0	0	0	0	0	0	0	0	0	6	0	0	0	0	0	0	0	0	0	0	0	0	0	0	0	0	0	0	11	0	0	0	0	0	0	0
OTU1246	0	0	0	0	0	0	0	0	0	0	0	0	0	0	0	0	0	0	0	0	0	0	0	0	0	0	0	0	0	0	0	0	0	0	0	0	0	15	9	0	0	0	0	0	0	0	0	0	0
OTU1247	0	0	0	0	0	0	0	0	30	0	0	0	0	0	0	0	0	0	0	0	0	0	0	18	0	0	0	18	0	17	0	0	0	20	0	0	0	0	0	0	0	0	0	0	0	0	0	0	0
OTU1248	0	0	0	0	0	0	0	0	0	0	52	0	0	0	0	0	0	0	0	0	47	22	25	27	14	47	13	62	0	49	0	32	55	18	74	24	25	16	42	43	0	0	0	0	0	8	0	0	0
OTU1249	0	0	0	0	0	0	0	0	0	0	0	0	0	13	0	0	0	0	0	0	16	0	7	29	57	24	18	0	0	0	8	0	16	0	11	26	0	17	13	9	0	0	0	0	0	0	0	0	0
OTU1250	0	0	0	0	0	0	0	0	0	0	0	0	0	0	0	0	0	0	0	0	0	0	0	0	0	0	0	0	0	12	0	0	0	0	0	0	0	9	0	0	0	0	0	0	0	0	0	0	0
OTU1251	0	0	0	0	0	0	0	0	0	0	0	0	0	0	0	0	0	0	0	0	0	0	0	0	0	0	0	0	0	5	0	0	0	0	0	9	0	0	0	0	0	0	0	0	0	0	0	0	0
OTU1252	0	0	0	0	0	0	0	0	0	0	0	0	0	0	0	0	0	0	0	0	0	0	5	0	0	0	0	0	0	0	0	0	7	0	0	0	0	0	0	8	0	0	0	0	0	0	0	0	0
OTU1253	0	0	0	0	0	0	0	0	0	0	0	0	0	0	0	0	0	0	0	0	0	0	0	0	0	0	0	0	0	0	0	0	0	3	0	7	0	0	0	0	0	0	0	0	0	0	0	0	0
OTU1254	0	0	0	0	0	0	0	0	0	0	0	0	0	0	0	0	0	0	0	0	0	23	0	19	22	26	26	27	25	23	26	12	14	23	28	23	16	30	25	26	0	0	0	0	0	0	0	0	0
OTU1255	0	0	0	0	0	0	0	0	0	0	0	0	0	0	0	0	0	0	0	0	38	4	0	0	0	7	0	0	9	0	0	0	0	0	0	0	0	0	10	26	0	0	0	0	0	0	0	0	0
OTU1256	0	0	0	0	0	0	0	0	0	0	0	0	0	0	0	0	0	0	0	0	0	0	10	0	0	0	10	0	0	0	0	0	0	0	0	0	0	0	0	0	0	0	0	0	0	0	0	0	0
OTU1257	0	0	0	0	0	0	0	0	0	0	0	0	0	0	0	0	0	0	0	0	0	7	0	0	0	0	0	0	0	0	0	0	0	0	0	9	16	0	13	18	0	0	0	0	0	0	0	0	0
OTU1258	0	0	0	0	0	0	0	0	0	0	0	0	0	0	0	0	0	0	0	0	0	0	0	0	0	0	4	0	0	0	0	0	0	0	0	3	0	0	0	0	0	0	0	0	0	0	0	0	0
OTU1259	11	0	0	0	0	0	0	0	0	0	0	0	0	0	0	0	0	0	0	0	0	0	3	0	0	0	0	0	0	0	0	0	7	0	3	0	11	0	0	8	0	0	0	0	0	0	0	0	0
OTU1260	0	0	0	22	0	0	0	0	0	0	0	0	10	0	0	0	0	0	0	0	0	0	0	0	0	0	0	0	0	7	0	0	0	0	0	0	0	0	0	0	0	0	0	0	0	0	0	0	0
OTU1261	0	0	0	0	0	0	0	0	0	0	0	0	0	0	0	0	0	0	0	7	0	0	0	0	7	0	0	0	0	0	0	0	0	0	0	0	0	0	0	0	0	0	0	0	0	0	0	0	0
OTU1262	0	0	0	0	0	0	13	0	0	0	0	0	0	0	0	0	0	0	0	0	0	0	0	0	0	0	0	0	0	0	0	11	0	0	0	0	0	0	0	0	0	0	0	0	0	0	0	0	0
OTU1263	0	0	0	0	0	0	0	0	0	0	0	0	0	0	0	0	0	0	0	0	0	0	0	0	0	0	0	0	0	0	0	0	0	0	0	0	0	0	0	0	0	0	23	0	0	0	0	9	0
OTU1264	0	0	0	0	0	0	0	0	0	0	0	0	0	0	0	0	0	0	24	0	0	0	0	0	0	0	40	0	0	0	0	0	0	0	0	0	0	0	0	0	0	0	0	0	0	0	0	0	0
OTU1265	0	0	0	0	0	0	0	0	0	0	0	13	0	0	0	0	0	0	0	0	0	0	0	0	0	0	0	0	0	0	0	0	9	0	0	0	0	0	0	0	0	0	6	5	0	0	0	0	0
OTU1266	0	0	0	0	0	0	0	0	0	0	0	0	0	0	0	0	0	0	0	0	0	0	0	0	0	0	0	0	0	0	0	0	0	17	0	0	0	0	0	0	0	0	0	0	0	0	0	0	0
OTU1267	0	0	0	0	0	0	0	0	0	0	0	0	0	0	0	5	0	0	0	0	0	0	0	0	0	0	0	0	0	0	0	0	0	0	0	0	0	0	0	0	0	0	0	0	0	0	0	0	0
OTU1268	0	0	0	0	0	0	0	0	0	0	0	0	0	0	0	0	0	0	0	0	0	0	13	0	6	0	0	0	0	0	0	0	0	0	0	0	0	16	0	0	0	0	0	0	0	0	0	0	0
OTU1269	0	0	0	0	0	0	0	0	0	0	0	0	0	0	0	0	0	0	0	0	0	0	0	0	0	0	0	0	0	0	0	0	0	0	0	0	0	0	0	0	0	0	0	0	0	49	0	0	0
OTU1270	0	0	0	0	0	0	0	0	0	0	6	0	0	0	0	0	0	0	0	0	0	0	0	0	0	0	0	0	0	0	0	0	0	0	0	0	0	0	0	0	0	0	0	0	0	0	0	0	0
OTU1271	0	0	0	0	0	0	0	0	0	0	0	0	0	0	0	0	0	0	0	0	0	0	0	0	5	0	0	0	0	13	0	0	0	10	0	0	0	0	6	0	0	0	0	0	0	0	0	0	0
OTU1272	0	0	0	0	0	0	0	0	0	18	0	0	0	0	0	0	0	0	0	0	0	0	0	0	0	0	0	0	0	0	0	0	0	0	0	0	0	0	0	6	0	0	0	0	0	0	0	0	0
OTU1273	0	0	0	0	8	0	0	0	0	0	0	0	0	0	0	0	0	0	0	0	25	11	0	5	14	7	6	6	9	25	17	14	10	14	11	14	0	0	35	15	0	0	0	0	0	0	0	0	0
OTU1274	0	62	0	0	59	0	0	0	0	0	0	0	0	0	0	0	0	0	0	0	0	0	0	0	0	13	0	0	0	0	0	0	0	0	0	0	0	19	0	0	0	0	0	0	0	0	0	0	0
OTU1275	0	0	0	0	0	0	0	0	0	0	0	0	0	0	0	0	0	0	0	0	0	0	0	0	2	0	0	0	20	29	0	16	0	0	0	44	0	0	0	33	0	0	0	0	0	0	5	0	0
OTU1276	0	0	0	0	0	0	0	0	0	0	0	0	0	0	0	0	0	0	0	0	0	0	0	0	0	0	0	0	9	0	0	11	18	0	0	0	0	16	8	17	0	0	0	0	0	0	0	0	0
OTU1277	0	12	0	53	0	0	0	0	79	37	0	0	50	0	62	0	0	0	35	33	13	4	32	16	0	0	49	0	0	0	0	0	19	0	7	0	0	0	0	20	0	0	14	1	0	0	0	0	38
OTU1278	0	0	0	0	0	0	0	0	0	0	0	0	0	0	0	0	0	0	0	0	0	0	0	0	9	7	0	0	14	5	4	0	6	38	0	0	7	0	28	11	0	0	0	15	0	0	0	0	0
OTU1279	0	0	0	0	0	0	0	0	0	0	0	0	0	0	0	0	0	0	0	0	0	0	0	0	0	0	0	0	0	0	0	0	0	0	0	0	7	18	0	7	0	0	0	0	0	0	0	0	0
OTU1280	0	0	0	0	0	0	0	0	0	0	0	0	0	0	0	0	0	0	0	0	0	0	0	0	0	0	0	0	0	16	0	17	0	0	0	0	0	0	0	0	0	0	0	0	0	0	0	0	0
OTU1281	0	0	0	0	0	0	0	0	0	0	0	0	0	0	0	0	0	0	0	0	0	0	0	0	0	0	0	0	0	5	0	0	0	0	0	7	0	0	0	8	0	0	0	0	0	0	0	0	0
OTU1282	0	0	0	0	0	0	0	0	0	0	0	0	0	0	0	0	0	0	0	0	0	0	0	0	0	0	0	0	0	0	0	0	9	0	11	0	0	0	0	19	0	0	0	0	0	0	0	0	0
OTU1283	0	0	0	0	0	0	0	0	0	0	0	0	0	0	0	0	0	0	0	0	0	0	0	0	0	0	14	0	0	17	0	8	0	0	0	0	0	0	0	0	0	0	0	10	0	0	0	0	0
OTU1284	0	0	0	0	0	0	0	0	0	0	0	0	0	0	0	0	0	0	0	0	0	0	0	2	0	0	0	0	0	7	8	4	0	9	0	0	0	0	0	0	0	0	0	5	0	0	0	0	0
OTU1285	0	0	0	0	0	0	0	0	0	0	0	0	0	0	0	8	0	6	0	0	0	0	0	0	0	0	4	0	0	0	0	0	0	0	0	0	3	0	0	0	0	0	0	0	0	0	0	0	0
OTU1286	0	0	0	0	0	0	0	0	0	0	0	0	0	45	0	0	0	0	0	0	0	0	0	0	0	0	0	0	0	0	0	0	0	0	0	0	0	0	36	0	0	0	0	0	0	0	0	0	0
OTU1287	0	0	0	0	0	0	0	0	0	0	0	0	0	0	0	0	0	0	0	0	27	39	0	0	27	28	29	0	28	27	0	35	24	28	24	21	34	19	28	44	0	0	0	0	0	0	0	0	0
OTU1288	0	0	0	0	0	0	0	0	0	0	0	0	0	0	0	0	0	0	0	0	0	0	5	0	5	0	0	0	0	0	0	0	0	0	0	0	0	0	0	10	0	0	0	0	0	0	0	0	0
OTU1289	0	0	0	0	0	0	0	0	0	0	0	0	0	0	0	0	0	0	0	0	8	16	0	4	15	18	17	17	0	0	0	0	0	0	11	0	0	0	0	16	0	0	0	0	0	0	0	0	0
OTU1290	0	0	0	0	0	0	0	0	0	0	0	0	0	0	0	0	0	0	0	0	0	0	0	0	0	0	0	0	0	0	0	0	0	0	0	0	0	0	0	0	0	6	0	0	0	0	0	0	0
OTU1291	0	0	0	0	0	0	0	0	0	0	0	0	0	0	0	0	0	0	0	0	0	0	0	0	0	11	0	0	0	0	0	0	0	0	10	0	0	0	0	0	0	0	0	0	0	0	0	0	0
OTU1292	0	0	0	0	0	0	0	0	0	0	0	0	0	0	0	0	0	0	0	0	0	0	0	0	0	0	0	0	5	0	0	0	0	0	0	0	0	0	0	5	0	0	0	0	0	0	0	0	0
OTU1293	0	0	0	0	0	0	0	0	0	0	0	0	0	0	0	0	0	0	0	0	20	23	21	27	0	99	0	28	34	19	0	25	33	27	28	23	27	34	27	0	0	0	0	0	0	0	0	0	0
OTU1294	0	0	0	0	0	0	0	0	0	0	0	0	14	0	0	0	0	0	0	0	69	41	32	36	56	123	140	147	128	61	0	32	87	0	35	40	95	0	29	27	0	93	0	0	0	0	0	0	0
OTU1295	0	0	0	0	15	0	0	0	0	0	0	35	0	0	0	0	0	0	0	0	43	36	0	47	0	71	55	40	51	19	0	14	45	0	54	66	22	0	60	74	0	0	0	0	0	66	0	0	0
OTU1296	37	52	17	44	27	42	0	47	28	51	0	132	62	33	85	0	28	50	167	117	34	0	43	22	26	36	57	45	44	34	14	32	44	36	21	34	49	55	34	45	0	21	31	0	0	0	0	17	134
OTU1297	0	0	0	0	0	0	0	0	0	0	0	0	0	0	0	0	0	0	0	0	0	0	7	0	0	0	0	0	0	0	0	0	0	0	0	10	0	0	0	3	0	0	0	0	0	0	0	0	0
OTU1298	0	0	0	0	0	0	0	0	0	0	0	0	0	0	0	0	0	0	0	0	0	6	19	0	0	0	0	0	0	0	0	0	0	0	0	0	10	0	0	0	0	0	17	7	0	22	0	0	11
OTU1299	0	0	0	0	5	0	0	0	0	0	0	0	0	0	0	0	0	16	0	26	15	0	0	0	0	15	0	0	0	17	0	0	13	0	0	0	0	13	10	0	0	7	0	0	5	0	0	0	8
OTU1300	0	0	0	0	0	0	0	0	0	0	0	0	0	0	0	0	0	0	0	0	0	21	0	0	0	0	21	0	0	0	0	0	0	0	0	0	16	0	0	9	0	0	0	0	0	0	0	0	0
OTU1301	0	0	0	0	0	0	0	0	0	0	0	0	0	0	0	0	0	0	0	0	0	0	5	0	0	5	9	0	0	0	0	0	0	9	6	0	0	4	0	0	0	0	0	0	0	0	0	0	0
OTU1302	0	0	0	0	0	0	0	0	0	0	0	0	0	0	0	0	0	0	0	0	0	0	0	0	0	0	0	0	0	0	0	0	0	0	0	0	0	0	7	0	0	0	31	0	0	0	0	0	0
OTU1303	0	0	0	0	0	0	0	0	0	0	0	0	0	0	0	0	0	4	0	0	0	0	0	0	0	0	0	0	0	0	0	0	0	0	0	9	7	0	0	0	0	0	0	0	0	0	0	0	0
OTU1304	0	0	0	0	0	0	0	0	0	0	0	0	0	0	0	0	0	0	0	0	0	0	0	0	0	0	0	0	8	0	0	0	0	0	0	0	0	10	0	0	0	0	0	0	0	0	0	0	0
OTU1305	0	0	0	0	0	0	0	0	0	0	0	0	0	0	0	0	0	0	0	0	0	0	0	0	5	0	0	0	4	2	0	0	0	0	0	0	0	0	0	6	0	0	0	0	0	0	0	0	0
OTU1306	0	0	0	0	0	0	0	0	0	0	0	0	0	0	0	0	0	0	0	0	11	18	15	8	15	10	0	10	11	0	0	0	17	0	0	0	0	0	8	0	0	0	0	0	0	0	0	0	0
OTU1307	0	0	0	0	0	0	0	0	0	0	0	0	0	0	0	0	0	0	0	0	0	0	0	0	0	0	0	0	0	0	0	0	0	0	0	0	0	0	0	0	0	0	0	0	0	2	0	0	0
OTU1308	0	0	0	0	0	0	0	0	0	0	0	0	0	0	0	0	0	0	0	0	0	5	10	0	9	0	0	0	12	0	0	7	10	0	0	0	0	0	0	19	0	0	0	0	0	0	0	0	0
OTU1309	6	0	0	0	0	0	0	0	0	0	0	0	0	0	0	0	0	0	0	0	0	0	0	0	0	0	0	0	0	0	0	0	0	0	0	0	0	7	12	10	0	0	0	0	0	0	0	0	0
OTU1310	0	0	0	0	0	0	0	0	0	0	0	0	0	0	0	0	0	0	0	0	97	0	0	0	0	0	37	0	0	0	0	0	11	0	0	0	0	0	0	9	0	0	0	0	0	0	0	0	0
OTU1311	0	0	0	0	0	0	0	0	0	0	0	0	0	0	0	0	0	0	0	0	0	0	5	0	0	0	0	0	0	0	0	0	0	0	0	0	0	0	0	0	0	0	0	0	0	0	0	0	0
OTU1312	0	0	0	0	0	0	0	0	0	0	0	0	12	0	0	0	0	0	0	3	24	13	0	0	0	41	0	0	24	15	60	28	46	47	29	48	35	68	17	41	29	0	31	0	12	114	0	0	0
OTU1313	0	0	0	0	0	0	0	0	0	0	0	0	0	0	0	0	0	0	0	0	12	0	0	0	0	0	0	0	0	0	0	0	0	0	0	12	0	13	14	16	0	0	0	0	0	0	0	0	0
OTU1314	0	0	0	0	0	0	0	0	0	0	0	0	0	0	0	0	0	0	0	0	0	18	0	0	0	13	15	0	0	0	0	0	0	0	0	0	7	0	0	0	0	0	0	0	0	0	0	0	0
OTU1315	0	0	0	0	0	0	0	0	0	0	0	0	0	0	0	0	0	0	0	0	0	0	0	0	0	0	0	0	0	0	0	0	0	0	0	0	0	0	0	0	0	0	21	0	0	5	0	0	0
OTU1316	0	0	0	0	0	0	0	0	0	0	0	0	0	0	0	0	0	0	0	0	8	18	0	0	8	0	24	0	46	32	7	0	13	9	0	0	4	0	6	11	0	0	0	9	0	0	0	0	0
OTU1317	0	0	0	0	0	0	0	0	0	0	0	0	0	0	0	0	0	0	0	0	0	0	0	0	4	0	0	0	0	0	0	2	4	0	0	0	0	0	0	0	0	0	0	0	0	0	0	0	0
OTU1318	0	0	0	0	0	0	0	0	0	0	0	0	0	0	0	0	0	0	0	0	0	0	0	0	0	0	0	0	0	0	0	0	0	0	0	0	0	0	0	0	0	0	0	0	0	0	0	0	0
OTU1319	0	0	0	0	0	0	0	0	0	15	0	0	0	0	0	0	0	0	0	0	4	8	0	0	0	0	0	0	0	0	0	0	0	0	0	0	4	0	0	0	0	0	0	0	0	0	0	0	0
OTU1320	0	0	0	0	0	0	0	0	0	0	0	0	0	0	0	0	0	0	0	0	0	0	0	0	0	19	0	0	0	0	0	0	0	0	0	0	8	0	0	0	0	0	0	0	0	0	0	0	0
OTU1321	0	0	0	0	0	0	0	0	0	0	0	0	0	0	0	0	0	0	0	0	28	19	17	12	24	28	19	17	33	26	0	0	26	24	24	29	19	14	34	46	0	0	0	0	0	0	0	0	0
OTU1322	0	0	0	0	0	0	0	0	0	0	0	0	0	0	0	0	0	0	0	0	0	21	23	0	32	0	0	0	0	0	24	0	27	23	39	0	39	56	0	0	0	0	0	0	7	0	0	0	0
OTU1323	0	0	0	0	0	22	0	0	0	17	0	0	0	0	0	0	0	0	0	0	0	0	15	0	8	0	0	0	0	0	11	0	0	0	0	0	0	20	0	10	0	0	0	0	0	0	0	0	0
OTU1324	0	0	0	0	0	0	0	0	0	0	0	15	0	0	0	0	0	0	0	63	16	0	28	25	0	37	38	53	21	21	0	71	15	17	22	25	22	0	14	41	0	0	0	0	0	0	0	0	0
OTU1325	120	0	0	19	43	0	0	0	0	0	54	0	0	0	0	0	0	0	0	0	58	60	44	39	0	0	59	0	59	0	0	42	42	59	63	59	91	49	39	48	89	41	50	0	26	0	0	0	0
OTU1326	0	0	0	0	0	0	0	0	0	0	0	0	0	0	0	0	0	0	0	0	97	85	94	63	69	52	105	77	87	90	74	41	101	71	83	91	80	85	130	121	0	0	0	0	0	0	0	0	11
OTU1327	0	0	0	0	0	0	0	0	0	0	0	0	0	0	0	0	0	0	0	0	0	0	0	0	0	3	0	0	9	0	0	0	0	0	0	0	0	0	0	0	0	0	0	0	0	0	0	0	0
OTU1328	0	0	0	0	0	0	0	0	0	0	0	0	0	0	0	0	0	0	0	0	0	0	0	0	7	0	0	0	0	3	0	0	7	0	0	0	0	0	0	10	0	0	0	0	0	0	0	0	0
OTU1329	0	0	0	0	0	0	0	0	0	0	0	0	0	0	0	0	0	0	0	0	0	0	0	0	0	0	0	7	6	21	16	0	32	0	0	0	0	0	0	0	0	0	0	0	0	0	0	8	0
OTU1330	0	0	0	0	0	0	0	0	0	0	0	0	0	0	0	0	0	0	0	0	0	0	0	0	0	0	0	0	0	29	0	0	14	0	0	0	0	0	21	0	0	0	0	0	0	0	0	0	0
OTU1331	0	0	0	0	0	0	0	0	0	0	0	0	0	0	0	0	0	0	0	0	0	0	0	0	13	0	0	0	0	0	0	0	0	0	0	25	0	0	0	0	0	0	0	0	0	0	0	0	0
OTU1332	0	0	0	0	0	0	0	0	0	0	0	0	0	0	0	0	0	0	0	0	12	22	20	23	14	24	19	19	26	27	13	19	40	21	18	15	11	25	24	34	0	0	0	0	0	0	0	0	0
OTU1333	0	0	0	0	0	0	0	0	0	0	0	0	0	0	0	0	0	0	0	0	0	0	0	0	0	0	0	0	11	0	0	0	0	0	0	5	0	0	0	0	0	0	0	0	0	0	0	0	0
OTU1334	0	0	0	0	0	0	0	0	0	0	0	0	0	0	0	0	0	0	0	0	0	0	0	0	0	0	0	0	0	0	0	0	0	0	0	0	0	0	8	5	0	0	0	0	0	0	0	0	0
OTU1335	0	0	0	0	0	0	0	0	0	0	0	0	0	0	0	0	0	0	0	0	0	0	0	0	0	0	33	0	0	0	0	0	0	0	0	0	0	0	0	0	0	0	0	0	0	0	0	0	0
OTU1336	0	0	0	0	0	0	0	0	0	0	0	0	0	0	0	0	0	0	0	0	0	15	0	0	0	9	0	0	0	0	0	0	0	8	0	0	0	0	11	0	0	0	0	0	0	0	0	0	0
OTU1337	0	0	0	0	0	0	0	0	0	0	0	0	0	0	0	0	0	0	0	28	189	207	224	172	285	304	279	186	321	188	145	235	59	173	153	200	267	257	198	234	13	14	12	0	0	0	0	0	0
OTU1338	0	0	0	0	0	0	0	0	0	0	0	0	0	0	0	0	0	0	0	0	32	44	40	0	0	45	43	24	24	0	0	0	0	0	31	53	35	34	0	43	0	13	0	0	0	0	0	0	0
OTU1339	0	0	0	0	0	0	0	0	0	0	0	0	0	0	0	0	0	0	0	0	0	0	0	12	0	0	0	0	0	0	0	0	0	21	0	0	0	0	0	0	0	0	0	0	0	0	0	0	0
OTU1340	0	0	0	0	0	0	0	0	0	0	0	0	0	0	0	0	0	0	0	0	0	0	0	0	0	0	0	0	0	0	0	0	0	0	13	0	0	0	0	0	0	0	0	0	0	0	0	0	0
OTU1341	0	0	0	0	0	0	0	0	0	0	0	0	0	0	0	0	0	0	0	0	0	0	0	0	0	8	0	0	0	0	0	0	0	0	6	0	0	4	0	0	0	0	0	0	0	0	0	0	0
OTU1342	0	0	0	0	0	18	0	0	0	0	0	0	0	0	0	0	0	0	0	0	0	0	0	0	0	0	0	0	0	0	0	0	0	0	17	0	0	0	0	0	0	0	0	0	11	2	0	0	0
OTU1343	22	0	0	75	0	90	0	0	0	0	0	0	0	0	0	0	0	0	0	0	0	0	0	0	0	0	0	0	0	0	0	0	0	0	0	0	0	0	0	0	0	0	0	0	0	0	0	0	0
OTU1344	0	0	0	0	0	0	0	0	0	0	0	0	0	0	0	0	0	0	0	0	0	0	0	0	0	4	5	0	0	0	18	0	0	10	0	0	0	10	0	0	0	0	0	0	0	0	0	0	0
OTU1345	0	0	0	16	0	0	0	0	0	0	0	0	0	0	13	0	0	0	0	0	0	4	0	0	0	0	0	0	0	0	0	0	0	0	0	0	0	0	0	0	0	0	0	0	0	0	0	0	0
OTU1346	0	0	0	0	0	0	0	0	0	0	0	0	0	0	0	0	0	0	0	0	0	0	0	0	8	0	0	7	7	3	0	0	0	0	0	0	0	10	0	8	0	0	0	0	0	0	0	0	0
OTU1347	0	0	0	0	0	0	0	0	0	0	0	0	0	0	0	0	0	0	0	0	0	0	0	0	0	0	0	0	0	0	0	3	3	0	0	0	0	0	4	0	0	0	0	0	0	0	0	0	0
OTU1348	0	0	0	0	0	0	0	0	0	0	0	0	0	0	0	0	0	0	0	0	0	0	0	0	0	0	0	6	0	0	4	0	0	0	0	0	0	0	0	0	0	0	0	0	0	0	0	0	0
OTU1349	0	0	0	0	0	0	0	0	0	0	0	0	0	0	0	0	0	0	0	0	0	0	0	0	0	0	0	0	0	0	0	0	0	0	0	0	0	0	0	0	18	0	0	0	11	0	0	0	0
OTU1350	0	0	0	0	0	0	0	0	0	0	0	0	0	0	0	0	0	0	0	0	0	0	0	0	0	0	0	0	0	0	0	0	0	0	0	0	0	0	0	0	0	0	0	0	0	0	0	0	0
OTU1351	0	0	0	0	0	18	0	0	0	0	0	0	0	0	0	0	0	0	0	0	0	0	0	0	0	0	0	0	0	0	0	0	0	0	0	0	0	0	0	0	0	0	0	0	0	0	0	0	0
OTU1352	0	0	0	0	0	0	0	0	0	0	0	0	0	0	0	0	0	0	0	0	0	15	0	0	0	0	0	0	0	22	0	0	0	0	0	0	0	0	0	0	3	0	0	0	0	0	0	0	0
OTU1353	0	0	0	0	0	0	0	0	0	0	0	0	0	0	0	0	0	0	0	0	22	0	33	0	0	19	0	25	0	0	0	0	0	12	0	0	0	11	17	0	0	0	0	0	0	0	0	0	0
OTU1354	0	0	0	0	0	0	0	0	0	0	0	0	0	0	0	0	0	0	0	0	0	0	0	0	0	0	0	0	0	0	0	0	0	0	0	0	0	0	0	0	0	0	16	0	0	12	0	0	0
OTU1355	0	0	0	0	0	0	0	0	0	0	0	0	0	0	0	0	0	0	0	0	40	0	0	0	0	0	0	0	0	0	0	0	0	0	0	0	0	0	0	0	0	0	0	0	0	0	0	0	0
OTU1356	0	0	0	0	0	0	0	0	0	0	0	0	0	0	14	0	0	0	0	0	0	28	0	67	36	0	23	0	0	38	22	0	0	43	0	0	0	0	0	0	0	0	22	0	0	0	0	0	0
OTU1357	0	0	0	0	9	0	0	0	0	0	0	0	8	0	0	0	0	0	0	0	0	0	0	0	5	0	0	12	0	16	0	0	0	5	0	0	0	0	0	0	0	23	0	0	0	0	0	0	0
OTU1358	0	0	0	0	0	0	0	0	0	0	0	0	0	0	0	0	0	0	0	0	57	50	63	86	96	29	85	83	88	90	75	75	0	89	70	124	133	56	0	60	0	21	0	0	0	0	0	0	0
OTU1359	0	0	0	0	0	0	0	0	0	0	0	0	0	0	0	0	0	0	0	0	0	0	0	17	0	0	0	0	0	0	0	0	0	0	0	0	0	0	0	3	0	0	0	0	0	0	0	0	0
OTU1360	0	0	0	0	0	0	0	0	0	0	0	0	0	0	0	0	0	0	0	0	0	0	0	0	0	0	24	0	0	0	0	0	0	0	0	0	0	62	0	0	11	0	0	0	0	0	0	0	0
OTU1361	0	23	0	47	79	0	0	14	29	0	0	79	53	39	175	0	0	97	210	106	65	86	51	32	59	45	96	41	65	65	29	71	53	51	27	54	53	66	66	47	0	32	18	0	0	0	0	0	0
OTU1362	0	0	0	0	0	0	0	0	0	0	0	0	0	0	0	0	0	0	0	0	0	0	0	0	0	0	0	0	0	0	0	0	0	0	7	0	0	0	0	0	0	0	0	0	0	0	0	0	0
OTU1363	0	0	0	13	0	0	0	0	0	0	0	0	0	0	0	0	0	0	0	17	0	0	0	0	0	0	0	0	0	0	0	0	0	0	0	0	0	0	0	0	0	0	0	0	0	0	0	0	0
OTU1364	0	13	0	0	0	0	0	0	0	0	0	0	0	0	0	0	0	0	0	0	0	0	0	0	0	0	0	0	0	0	0	0	0	0	0	0	0	14	0	0	0	0	0	0	0	0	0	0	0
OTU1365	0	0	0	0	0	0	0	0	0	0	0	0	0	0	0	0	0	0	0	0	0	0	0	0	0	0	12	0	0	0	0	0	0	0	0	12	0	0	0	0	0	0	0	0	0	0	0	0	0
OTU1366	0	0	0	0	0	0	0	0	0	0	0	0	0	0	0	0	0	0	0	0	0	0	0	0	0	0	0	0	0	0	0	0	0	0	0	0	0	0	0	0	0	0	0	0	0	0	0	0	0
OTU1367	0	0	0	0	0	15	0	0	0	10	0	0	0	0	14	0	0	0	172	0	27	0	18	23	0	0	17	0	0	0	0	0	0	0	0	0	28	0	0	24	0	0	0	0	7	0	0	0	0
OTU1368	0	0	0	0	0	0	0	0	0	0	0	0	0	0	0	0	0	15	0	0	0	0	0	0	0	0	0	0	0	0	0	0	0	0	0	0	0	0	0	0	0	0	0	0	0	0	0	0	0
OTU1369	0	0	0	0	0	0	0	0	0	0	0	0	0	0	0	0	0	0	0	0	0	11	0	0	0	0	0	0	0	0	0	0	0	0	0	0	0	0	0	0	0	0	0	0	0	0	0	0	0
OTU1370	0	0	0	0	0	0	0	0	0	0	0	0	0	0	0	0	2	0	0	46	0	17	72	0	0	19	18	54	72	0	42	83	28	34	0	57	0	37	68	92	0	0	0	0	0	0	0	0	0
OTU1371	0	0	0	0	0	0	0	0	0	0	0	0	0	0	0	0	0	0	0	0	0	0	0	0	0	0	0	0	0	0	0	0	3	0	0	0	0	0	0	0	0	0	0	0	0	0	0	0	0
OTU1372	0	0	0	0	0	0	0	0	0	0	0	0	0	0	0	0	0	0	0	0	11	22	8	11	0	0	20	0	0	17	0	0	18	0	17	0	0	23	11	0	0	0	0	0	0	0	0	0	0
OTU1373	0	0	0	0	0	0	0	0	0	0	0	0	0	0	12	0	0	0	0	0	0	0	0	0	0	0	0	0	0	0	0	0	0	0	0	0	0	0	0	0	0	0	0	0	0	0	0	0	0
OTU1374	0	0	0	0	0	0	0	0	0	13	0	0	0	0	0	0	0	0	0	0	43	0	69	0	23	0	0	54	42	51	0	0	0	10	0	0	0	0	0	0	0	0	0	0	0	0	0	0	0
OTU1375	0	0	0	0	0	0	0	0	0	0	0	11	0	0	0	0	0	0	0	0	0	0	0	0	0	0	0	6	0	23	0	0	0	0	0	0	0	0	0	0	0	0	0	0	0	0	0	0	0
OTU1376	0	0	0	0	0	0	0	0	0	0	0	0	0	0	0	0	0	0	0	0	0	0	0	0	0	0	0	0	0	0	0	0	0	0	0	0	0	0	0	0	28	0	0	0	0	9	0	0	0
OTU1377	0	0	0	0	0	0	0	0	0	0	0	0	0	0	0	0	0	0	0	0	0	0	0	0	0	8	0	7	11	6	0	0	0	0	8	0	0	6	0	0	0	0	0	0	0	0	0	0	0
OTU1378	0	0	0	0	0	0	0	0	0	0	9	0	0	38	0	0	0	0	0	0	26	26	0	0	0	0	0	0	0	0	0	0	0	0	36	0	0	34	0	0	0	0	0	0	0	0	0	0	0
OTU1379	0	0	0	19	0	0	0	0	0	0	0	0	0	0	0	0	0	0	0	0	0	0	0	0	0	0	0	0	0	0	0	0	0	0	0	0	0	0	0	0	0	0	0	0	0	0	0	0	0
OTU1380	0	0	0	0	13	0	0	0	0	0	0	0	0	0	0	0	0	0	0	0	0	21	0	0	33	0	0	39	40	0	30	19	59	38	0	0	21	0	0	47	0	0	0	0	0	0	0	0	0
OTU1381	0	0	0	0	0	0	0	0	0	0	0	0	0	0	0	0	0	0	0	0	20	0	0	0	0	0	15	0	0	0	0	0	0	0	0	0	0	0	0	0	0	0	0	0	0	0	0	0	0
OTU1382	0	0	0	0	0	0	0	0	0	0	0	0	0	0	0	0	0	0	0	0	0	0	0	0	0	8	0	0	0	7	0	0	0	0	0	0	0	0	10	0	0	0	0	0	0	0	0	0	0
OTU1383	0	0	0	0	0	0	0	0	0	0	0	0	0	0	0	0	0	0	0	0	0	46	0	0	0	0	0	0	0	57	0	0	0	0	0	0	0	52	0	40	71	0	0	0	0	68	0	0	0
OTU1384	0	0	0	0	21	0	0	0	0	0	0	0	0	0	0	0	0	0	0	0	0	0	0	0	12	0	0	0	0	0	0	0	0	0	0	0	0	0	0	0	0	0	0	0	0	0	0	0	0
OTU1385	0	0	0	0	0	0	0	0	0	0	0	0	0	0	0	0	0	0	0	0	0	4	12	0	0	22	5	5	0	0	0	7	0	5	0	10	7	0	12	0	0	0	0	0	0	11	0	0	0
OTU1386	0	0	0	0	28	8	0	0	0	0	0	0	0	0	0	0	0	39	0	0	0	0	0	0	7	10	0	0	0	0	0	0	0	0	0	0	0	0	0	0	0	0	0	0	0	0	0	0	23
OTU1387	0	0	0	0	5	0	0	0	0	0	0	10	0	0	0	0	0	0	0	0	0	26	0	0	0	0	0	0	0	0	0	0	0	0	0	0	0	0	0	0	0	0	0	0	0	0	0	0	0
OTU1388	0	0	0	0	0	0	0	0	0	0	0	0	0	0	0	0	0	0	0	27	187	326	155	176	267	234	291	300	313	305	172	251	222	141	247	379	237	181	339	465	0	0	0	0	0	0	0	0	0
OTU1389	0	0	0	0	18	0	0	0	0	0	0	9	0	0	0	0	0	0	0	63	86	90	176	136	100	102	150	160	119	144	127	47	116	116	122	165	112	102	86	96	0	35	27	0	11	0	0	0	0
OTU1390	0	0	0	0	0	0	0	0	0	0	0	0	0	0	0	0	0	0	0	0	0	0	0	0	0	0	0	2	0	0	0	0	0	0	0	0	0	0	0	0	0	0	0	0	0	0	0	0	0
OTU1391	0	0	0	0	0	0	0	0	0	0	0	0	0	0	0	0	0	0	0	0	0	24	0	0	24	29	23	17	0	0	0	0	38	0	0	0	18	19	26	0	0	0	0	0	0	0	0	0	0
OTU1392	0	0	0	0	0	0	0	0	0	0	0	0	0	0	0	0	0	0	0	0	0	0	8	0	0	9	0	0	11	0	0	0	0	0	0	0	13	14	20	11	0	0	0	0	0	0	0	0	0
OTU1393	33	0	0	0	0	0	0	0	0	0	0	0	0	0	0	0	0	0	0	0	0	0	0	0	0	0	0	0	0	0	0	0	0	0	0	0	0	0	0	0	0	0	0	0	0	0	0	0	0
OTU1394	0	0	0	0	0	12	0	0	0	0	0	0	0	0	0	0	0	0	0	0	0	0	0	0	0	0	0	0	0	0	0	0	21	0	0	0	0	35	0	0	0	0	0	0	0	0	0	0	0
OTU1395	0	0	0	0	0	0	0	0	0	0	0	0	0	4	0	0	0	0	0	0	0	0	0	6	0	0	0	0	0	0	0	0	0	0	0	0	0	0	0	0	0	0	0	0	0	0	0	0	0
OTU1396	0	0	0	0	0	0	0	0	0	0	0	0	0	0	7	0	0	0	0	0	0	0	0	0	0	0	0	0	0	0	0	0	0	0	0	0	0	0	0	0	0	0	0	0	0	0	0	0	0
OTU1397	0	0	0	0	0	0	0	0	0	0	0	0	0	0	0	0	0	0	0	0	0	0	0	0	0	0	0	0	0	0	0	0	0	7	0	0	0	0	0	6	0	0	0	0	0	0	0	0	0
OTU1398	0	0	0	0	0	0	0	0	0	0	0	0	0	0	0	0	0	0	0	0	4	0	0	0	0	0	8	0	0	5	0	0	0	0	0	0	0	0	0	0	0	0	0	0	0	0	0	0	0
OTU1399	0	0	0	0	22	0	0	0	0	0	0	0	37	0	39	0	0	22	0	13	22	18	17	10	0	16	9	18	18	9	8	25	24	8	14	8	0	0	17	14	0	0	0	0	0	0	0	0	13
OTU1400	0	0	0	0	0	0	0	0	0	0	0	0	0	0	0	0	0	0	0	0	0	35	25	0	12	30	24	0	36	0	16	96	55	26	0	32	0	27	67	24	0	0	0	0	0	0	0	0	0
OTU1401	0	0	0	0	0	0	0	0	0	0	0	0	0	0	0	0	0	0	0	0	0	13	0	0	8	0	0	0	0	0	0	0	0	0	0	0	0	0	0	0	0	0	0	0	0	0	0	0	0
OTU1402	0	0	0	0	0	0	0	0	0	0	0	0	0	0	0	0	0	0	0	0	0	0	0	0	0	0	0	0	0	0	0	0	0	0	0	0	0	0	0	0	0	0	9	0	0	0	0	0	0
OTU1403	0	0	0	0	0	0	0	0	0	0	0	0	0	0	0	0	0	0	22	0	135	204	120	93	175	252	176	236	103	202	83	26	129	199	148	176	172	163	168	405	0	13	0	0	0	21	0	0	0
OTU1404	0	0	0	0	0	0	0	0	0	0	0	0	0	0	0	0	0	0	0	0	0	0	0	0	0	0	0	0	0	0	0	0	27	6	7	0	15	0	8	19	0	0	0	0	0	0	0	0	0
OTU1405	0	0	0	0	0	0	0	0	0	0	0	0	0	0	0	0	0	0	0	0	0	3	17	4	9	0	0	0	0	0	10	0	0	0	0	0	0	0	0	0	0	0	0	0	0	0	0	0	0
OTU1406	0	0	0	0	0	0	0	0	0	0	0	0	0	0	0	0	0	0	0	0	0	12	0	0	8	0	0	0	0	0	0	0	0	0	0	0	0	0	8	0	0	0	0	0	0	0	0	0	0
OTU1407	0	0	0	0	0	0	0	0	0	0	0	0	0	0	0	0	0	0	0	0	24	0	11	52	42	34	0	20	0	62	33	0	15	39	10	8	0	0	59	0	0	0	38	0	0	38	0	0	0
OTU1408	0	0	0	0	0	0	0	0	0	0	0	0	0	28	0	0	0	0	0	44	43	64	69	39	85	61	79	49	85	102	40	19	73	63	40	94	79	65	65	89	0	0	0	0	0	0	0	0	0
OTU1409	12	34	0	17	0	17	0	13	9	16	0	0	0	0	0	0	0	0	0	0	0	0	0	0	0	0	0	0	0	0	0	0	0	0	0	0	0	0	0	0	23	13	0	7	0	6	8	52	105
OTU1410	0	0	0	23	0	0	0	0	0	0	7	0	0	0	0	0	0	0	0	0	0	0	0	0	0	0	0	0	0	0	21	0	0	0	0	0	0	0	0	0	0	0	0	0	0	0	0	0	0
OTU1411	0	0	0	0	0	0	0	0	0	0	0	0	0	0	0	0	0	0	0	0	0	0	0	0	25	0	16	0	0	14	0	0	0	0	0	0	0	0	0	0	0	0	0	0	0	0	0	0	0
OTU1412	0	0	0	0	0	0	0	0	0	0	0	0	0	0	0	0	0	0	0	0	0	20	0	0	0	0	0	0	0	0	0	0	0	0	11	0	0	0	0	0	0	0	0	0	0	0	0	0	0
OTU1413	0	0	0	0	0	0	0	0	0	0	0	0	0	0	0	0	0	0	0	0	0	0	0	0	0	9	0	0	0	0	0	0	0	0	9	0	16	0	0	0	0	0	0	0	0	0	0	0	0
OTU1414	0	14	0	16	0	0	0	0	0	0	0	0	35	0	38	0	7	0	0	20	14	0	0	15	0	59	12	25	17	0	143	18	109	0	0	0	18	19	10	16	31	0	296	0	70	0	0	0	0
OTU1415	0	0	0	0	0	0	0	0	0	0	0	0	0	0	0	0	0	0	0	0	0	0	12	6	7	0	0	0	0	0	0	0	8	16	10	18	24	0	12	0	0	0	0	0	0	0	0	0	0
OTU1416	0	6	0	0	0	0	0	0	0	0	0	0	0	0	0	0	0	0	0	0	0	0	0	8	0	0	0	0	0	22	0	0	0	0	0	0	0	0	0	0	0	0	0	0	0	0	0	0	0
OTU1417	0	0	0	0	0	0	0	0	0	0	0	0	0	0	0	0	0	0	0	0	0	0	0	0	0	0	0	0	0	0	0	0	0	0	0	0	0	9	0	0	0	0	0	0	0	0	0	0	0
OTU1418	0	0	0	0	0	0	0	0	0	0	0	0	0	0	31	0	0	0	0	0	0	0	0	26	0	0	19	26	0	0	0	0	0	0	0	0	0	0	24	0	0	0	46	0	0	0	0	0	0
OTU1419	0	0	0	0	7	0	0	0	0	0	0	0	0	0	0	0	0	0	0	0	0	22	0	29	25	21	17	25	25	20	0	0	26	15	12	17	24	18	27	21	0	0	0	11	0	0	0	0	0
OTU1420	0	0	0	0	0	0	0	0	0	0	0	0	0	0	0	0	0	0	0	0	27	26	33	25	27	15	35	33	44	25	21	8	37	50	50	0	0	85	45	54	0	0	14	0	0	0	0	0	0
OTU1421	0	0	0	0	0	0	0	0	0	0	0	0	0	0	0	0	0	0	0	0	48	0	30	39	40	0	35	75	72	0	0	42	44	0	0	0	33	0	34	8	0	0	0	0	0	0	0	0	0
OTU1422	0	0	0	0	0	0	0	0	0	0	0	0	0	0	0	0	0	0	0	0	0	0	0	0	0	0	0	0	0	0	0	0	0	0	0	19	10	0	0	0	0	0	0	0	0	0	0	0	0
OTU1423	0	0	0	0	0	0	0	0	0	0	0	0	0	0	0	0	0	0	0	0	0	0	0	0	0	0	0	0	0	0	0	0	0	7	0	0	0	0	0	0	0	0	0	0	0	13	0	0	0
OTU1424	0	0	0	0	0	0	0	0	0	0	0	0	0	0	0	0	0	0	0	0	0	0	0	9	0	0	0	0	0	0	0	0	0	0	0	0	0	0	0	14	0	0	0	0	0	0	0	0	0
OTU1425	0	0	0	0	0	0	0	0	0	0	0	0	0	0	0	0	0	0	0	0	0	6	0	0	12	0	0	0	0	0	0	0	9	0	0	0	0	9	3	6	0	0	0	0	0	0	0	0	0
OTU1426	0	0	0	0	11	0	0	0	0	0	0	0	0	0	0	0	0	0	0	0	0	0	0	0	0	0	0	0	0	0	0	0	0	0	0	0	0	0	0	0	0	0	0	0	0	0	0	0	0
OTU1427	0	0	0	0	11	0	0	0	0	0	0	0	0	0	0	0	0	0	0	0	0	20	0	0	0	0	26	0	0	0	0	0	0	20	0	0	0	23	0	16	0	0	0	0	0	0	0	0	0
OTU1428	0	0	0	0	0	0	0	0	0	0	0	0	0	0	0	0	0	0	0	0	0	0	0	0	0	0	7	0	0	0	0	0	0	0	0	0	0	0	0	0	22	0	12	0	0	21	0	0	0
OTU1429	0	0	0	0	0	0	0	0	0	0	0	0	0	0	0	0	0	0	0	0	0	0	5	0	0	7	0	0	0	0	0	0	0	0	0	0	9	0	0	11	0	0	0	0	13	0	0	0	0
OTU1430	0	0	0	0	0	0	0	0	0	0	0	0	0	0	0	0	0	0	0	0	21	0	0	0	0	0	0	0	0	0	0	0	0	0	0	0	0	0	0	68	0	0	0	0	0	0	0	0	0
OTU1431	0	0	0	0	0	0	0	0	0	0	0	0	0	0	0	0	0	0	0	0	0	5	0	0	0	0	0	0	0	0	0	0	0	5	0	0	0	0	0	8	0	0	0	6	0	0	0	0	0
OTU1432	27	30	0	0	0	0	0	0	0	0	0	0	0	0	56	0	0	0	0	19	36	17	34	45	38	0	48	0	24	39	22	25	0	37	0	0	0	0	0	0	10	0	0	0	42	0	0	0	0
OTU1433	0	0	0	0	0	0	0	0	0	0	0	0	0	0	0	0	0	0	0	0	0	0	0	0	0	0	0	0	0	0	0	0	0	38	0	0	0	0	0	0	0	0	0	0	0	0	0	0	0
OTU1434	0	0	0	0	0	0	0	0	0	0	0	0	0	0	0	0	0	0	0	0	0	0	0	0	0	0	0	0	0	2	0	0	0	0	0	0	0	0	0	0	0	0	0	0	0	0	0	0	0
OTU1435	0	0	0	0	0	0	0	0	0	0	17	0	0	0	0	0	0	0	0	0	0	0	0	0	0	0	0	0	11	0	0	0	0	0	4	0	12	17	0	0	0	0	0	0	0	0	0	0	0
OTU1436	0	0	0	0	0	0	0	0	0	0	0	0	0	0	0	0	0	0	0	0	29	36	26	27	29	37	40	33	37	35	0	49	28	25	25	31	34	34	32	31	0	0	0	0	0	0	0	0	0
OTU1437	0	0	0	0	17	48	0	17	0	33	14	27	25	19	172	0	0	120	116	34	31	36	16	23	19	29	58	26	43	22	15	34	41	16	23	24	42	21	36	34	0	0	0	8	32	0	0	0	0
OTU1438	0	0	0	0	0	0	0	0	0	0	0	0	0	0	0	0	0	0	0	0	0	0	13	17	19	19	18	14	0	15	0	0	26	35	17	21	22	22	23	43	0	0	0	0	0	0	0	0	0
OTU1439	0	0	0	0	0	0	0	5	0	25	0	0	0	0	14	16	0	0	0	13	0	0	0	0	0	0	0	0	0	0	0	0	0	0	0	0	0	0	0	0	0	0	0	0	0	0	0	0	0
OTU1440	0	0	0	0	0	0	0	0	0	0	0	0	0	0	0	0	0	0	0	0	0	0	0	0	0	0	0	0	0	0	0	0	0	5	0	0	0	4	0	0	0	0	0	0	0	0	0	0	0
OTU1441	0	0	0	0	0	0	0	0	0	0	0	0	0	0	0	0	0	0	0	0	27	0	0	0	0	0	0	27	0	0	0	0	0	33	0	0	28	0	0	0	0	0	0	0	0	0	0	0	0
OTU1442	0	0	0	0	0	0	0	0	0	0	0	0	0	0	0	0	0	0	0	0	0	0	0	0	7	0	0	0	0	0	0	11	0	0	0	0	0	0	0	0	0	3	0	0	0	0	0	0	0
OTU1443	0	0	0	0	0	0	0	0	0	0	0	0	0	0	0	0	0	0	0	0	0	0	0	0	0	0	13	0	0	0	0	0	0	63	0	0	0	0	0	0	0	0	0	0	0	0	0	0	0
OTU1444	0	0	0	0	0	0	0	0	0	0	0	0	0	0	0	0	0	0	0	0	0	0	0	0	0	0	0	0	0	31	0	0	0	11	0	0	0	0	0	0	13	0	0	0	0	0	0	0	0
OTU1445	0	0	0	0	0	0	0	0	0	0	0	0	0	0	0	0	0	0	0	0	17	18	0	9	20	17	0	32	14	31	0	21	0	14	19	21	10	0	0	17	0	0	0	0	0	0	0	0	0
OTU1446	0	0	0	0	0	0	0	0	0	0	0	0	0	0	0	0	0	0	0	0	33	0	0	0	33	0	0	0	0	27	0	0	26	17	0	0	20	0	23	0	0	0	0	0	0	25	0	0	0
OTU1447	18	0	0	0	0	0	0	0	0	0	0	0	0	0	0	0	0	0	0	0	0	61	0	0	30	0	0	0	0	91	47	24	0	49	21	13	0	0	15	0	0	64	0	52	0	0	0	0	0
OTU1448	0	0	0	0	0	0	0	0	0	0	0	0	0	0	0	0	0	0	0	0	0	15	0	25	14	0	7	0	0	0	0	0	0	0	0	0	0	20	0	0	0	0	0	0	0	0	0	0	0
OTU1449	0	0	0	0	0	0	0	0	0	0	0	0	0	0	0	0	0	0	0	0	0	21	33	36	18	0	23	32	52	23	0	0	0	0	24	46	0	17	24	23	0	0	0	0	0	0	0	0	0
OTU1450	0	0	0	0	0	0	0	0	0	0	0	0	0	0	0	0	0	0	0	0	9	0	11	0	0	0	0	0	0	0	0	0	0	10	0	0	0	0	7	0	0	0	0	0	0	0	0	0	0
OTU1451	0	0	0	0	0	0	0	0	0	0	0	0	0	0	0	0	0	0	0	0	0	0	0	0	0	0	0	0	0	0	0	0	0	0	0	0	0	0	0	0	0	0	0	0	0	0	0	0	0
OTU1452	0	0	0	0	0	0	0	0	0	0	0	0	0	0	0	0	0	0	0	0	0	0	0	15	0	22	0	0	0	0	0	0	0	0	0	0	0	0	0	0	0	0	0	0	0	0	0	0	0
OTU1453	0	0	0	0	0	0	0	0	0	0	0	0	0	0	0	0	0	0	0	0	0	0	0	0	0	0	0	0	0	0	0	0	0	0	0	0	0	0	0	0	0	0	11	0	0	40	0	0	0
OTU1454	0	0	0	0	0	0	0	0	0	0	0	0	0	0	8	0	0	0	0	7	0	0	0	0	0	0	0	0	0	0	0	0	0	0	0	0	0	0	0	0	0	0	0	0	0	0	0	0	0
OTU1455	0	0	0	0	0	0	0	0	0	0	0	0	0	0	0	0	0	0	0	0	13	23	21	28	25	37	0	41	38	33	21	0	30	26	0	36	17	0	30	30	0	0	0	0	0	0	0	0	0
OTU1456	0	0	0	0	0	0	0	0	0	0	0	0	0	0	0	0	0	0	0	0	0	0	0	0	0	15	10	0	0	0	17	0	0	0	0	0	0	0	0	0	0	0	0	0	0	0	0	0	0
OTU1457	0	0	0	0	0	0	0	0	0	0	0	0	0	0	0	0	0	0	0	0	0	0	0	0	0	0	0	0	0	0	0	0	0	0	0	0	0	0	0	0	0	0	0	0	0	33	0	0	0
OTU1458	0	0	0	0	0	0	0	0	0	0	0	0	0	0	0	0	0	0	0	0	0	30	0	0	0	0	68	31	0	0	0	56	41	23	0	0	86	60	54	21	0	0	0	0	0	0	0	0	0
OTU1459	0	0	0	0	0	0	0	0	0	0	0	0	0	0	0	0	0	0	0	0	0	0	0	0	0	0	0	0	0	0	0	0	0	0	0	0	0	0	4	0	0	0	0	0	0	0	0	0	0
OTU1460	0	0	0	0	0	0	0	0	0	0	0	0	0	0	0	0	0	0	0	0	0	0	0	0	0	0	0	0	0	0	0	0	0	0	0	0	0	0	0	0	0	0	0	0	0	0	0	0	0
OTU1461	0	16	7	49	41	30	0	0	15	22	0	20	0	0	0	10	0	0	0	0	78	64	109	67	89	101	121	100	44	53	60	44	117	0	68	102	141	151	70	135	0	19	16	0	0	31	0	0	32
OTU1462	0	0	0	0	0	0	0	0	0	0	0	32	0	0	0	0	0	0	0	0	0	0	0	0	0	0	0	0	0	0	0	0	0	0	0	0	0	0	0	0	0	0	0	0	0	0	0	0	0
OTU1463	0	0	3	0	0	0	0	0	0	0	0	0	0	0	0	0	0	0	0	0	0	0	0	0	0	0	0	0	0	0	0	0	0	0	0	0	0	0	0	0	0	0	0	0	0	0	0	0	18
OTU1464	0	0	0	0	0	0	0	0	0	0	0	0	0	0	0	0	0	0	0	0	0	0	0	0	0	26	0	0	0	12	25	0	0	0	0	0	0	0	34	0	0	0	0	0	0	0	0	0	0
OTU1465	0	9	0	0	0	0	16	0	0	0	0	3	0	75	0	0	0	0	0	73	43	37	67	42	37	19	21	9	10	53	65	26	22	89	12	7	12	30	58	11	0	0	0	0	0	0	0	0	13
OTU1466	0	0	0	0	0	0	0	0	0	0	0	8	0	0	0	0	0	0	14	0	0	0	0	0	0	0	0	0	8	0	0	0	0	0	0	0	9	0	0	9	0	0	0	0	0	0	0	0	0
OTU1467	0	11	0	0	17	0	0	0	0	0	0	0	0	0	0	0	0	0	0	0	0	0	0	0	0	0	0	0	0	0	0	0	0	0	0	0	0	0	0	0	0	0	0	0	0	0	0	0	0
OTU1468	0	0	0	0	0	0	0	0	0	0	0	0	0	0	0	0	0	0	0	0	0	35	53	0	35	0	38	32	32	34	0	0	59	0	26	33	0	0	0	48	0	0	0	0	0	0	0	0	0
OTU1469	0	0	0	20	19	0	0	0	0	0	0	0	15	8	47	32	0	0	35	43	33	20	31	25	0	36	25	18	24	0	10	31	18	0	0	16	37	29	32	47	0	6	14	6	0	0	0	0	56
OTU1470	0	0	0	0	17	0	0	0	0	0	0	0	0	0	0	0	0	0	0	0	0	25	0	0	0	0	24	0	0	0	0	26	0	0	0	0	0	0	0	0	0	5	33	0	0	0	0	0	0
OTU1471	0	0	0	8	0	0	0	0	0	0	0	0	0	0	0	0	0	0	0	0	0	0	0	0	0	0	0	0	0	0	0	0	0	0	0	0	0	0	0	0	0	0	0	0	0	0	0	0	0
OTU1472	0	0	0	0	0	0	0	0	0	0	0	0	0	0	0	0	0	0	0	13	12	16	13	0	24	0	0	26	23	18	0	0	0	0	0	23	0	31	0	0	0	0	0	0	0	0	0	0	0
OTU1473	0	0	0	0	0	0	0	0	0	0	0	0	0	0	0	0	0	0	0	0	9	0	0	8	9	12	8	0	9	16	9	0	14	0	0	10	14	9	0	0	0	0	0	0	0	0	0	0	0
OTU1474	0	34	0	0	0	0	0	0	0	0	0	0	0	0	30	20	0	0	0	0	11	0	0	0	0	28	0	0	0	0	0	0	0	0	0	0	0	0	0	0	14	0	0	0	0	0	0	0	0
OTU1475	0	0	0	0	0	0	0	0	0	0	0	0	0	0	0	0	0	0	0	0	7	0	0	0	0	0	0	0	0	6	0	0	0	0	0	0	0	8	0	0	0	0	0	0	0	0	0	0	0
OTU1476	0	0	0	0	0	0	0	0	0	0	0	0	0	0	0	0	0	0	0	0	15	9	12	0	15	10	0	17	16	18	0	11	20	0	8	18	0	0	20	29	0	0	0	0	0	0	0	0	0
OTU1477	0	0	0	0	0	0	0	0	0	0	0	0	0	0	0	0	0	13	0	0	0	0	0	0	0	0	7	0	0	0	0	0	0	0	0	0	0	0	0	0	0	0	0	0	0	0	0	0	0
OTU1478	0	0	0	0	0	0	0	0	0	0	0	0	0	0	0	0	0	0	0	0	0	0	0	0	0	0	0	0	0	0	0	0	0	0	0	0	0	0	0	5	0	0	0	0	0	0	0	0	0
OTU1479	0	0	0	0	8	0	0	0	0	0	0	0	0	0	0	0	0	0	0	0	23	33	26	23	0	0	0	0	0	40	0	14	0	0	12	24	0	0	0	0	0	0	0	0	0	0	0	0	0
OTU1480	0	0	0	0	0	0	0	0	0	0	0	0	0	0	0	0	0	0	0	0	19	19	16	33	30	63	24	21	32	23	0	24	35	22	20	19	25	43	15	39	0	0	0	0	0	0	0	0	0
OTU1481	0	0	524	0	0	0	0	0	0	0	9	0	0	0	22	0	0	0	0	0	76	0	21	0	40	0	0	24	0	18	0	0	0	24	0	0	0	0	0	17	0	0	0	0	0	92	9	0	0
OTU1482	0	0	0	0	0	0	0	0	0	0	0	0	0	0	0	0	0	0	0	0	136	153	70	88	64	98	145	168	84	131	64	115	108	58	87	108	101	55	152	256	25	0	0	0	0	0	0	0	0
OTU1483	0	0	0	0	0	0	0	0	0	0	0	0	0	0	0	0	0	0	0	0	0	14	0	0	0	0	0	0	0	0	0	0	0	0	0	0	14	0	9	13	0	0	0	0	0	0	0	0	0
OTU1484	0	0	0	0	0	0	0	0	0	0	0	0	0	0	0	0	0	0	0	0	0	0	6	0	0	0	0	0	0	0	0	0	0	0	0	5	0	0	0	0	0	0	0	0	0	0	0	0	0
OTU1485	0	0	0	0	0	0	0	0	0	0	0	0	0	0	0	0	0	0	0	0	0	0	0	0	0	0	0	0	0	0	0	0	0	0	0	14	0	0	0	0	0	3	0	0	0	0	0	0	0
OTU1486	97	0	0	0	23	0	0	0	0	0	0	0	0	142	57	0	0	0	12	0	88	208	284	243	76	32	69	0	82	227	176	0	21	234	47	11	54	0	159	0	14	0	48	38	0	0	0	0	0
OTU1487	0	0	0	0	0	0	0	0	0	0	0	0	0	0	0	0	0	0	0	0	0	0	0	0	0	0	0	0	0	0	0	0	13	0	0	0	0	0	0	0	0	0	0	0	0	0	0	0	23
OTU1488	0	0	0	0	0	0	0	0	0	0	0	0	0	0	0	0	0	0	0	0	0	0	0	0	0	0	0	0	0	0	0	0	0	0	0	0	0	0	0	0	0	0	0	0	0	0	0	0	0
OTU1489	108	131	0	252	82	159	78	120	62	171	79	78	93	0	70	84	125	48	0	0	0	0	0	0	0	0	0	0	0	0	0	0	0	0	0	0	0	0	0	0	107	0	0	28	69	0	85	166	191
OTU1490	0	0	0	0	0	0	0	0	0	0	0	0	0	0	0	0	0	0	0	0	0	0	0	0	0	0	0	26	0	0	0	0	0	0	0	0	0	23	14	25	0	0	0	0	0	0	0	0	0
OTU1491	0	0	0	0	0	0	0	0	0	0	0	0	0	26	0	0	0	0	0	0	0	30	31	10	0	0	0	0	0	25	37	0	18	16	0	11	15	0	117	16	0	0	0	0	0	0	0	0	0
OTU1492	0	0	0	0	0	0	0	0	0	0	0	0	0	0	0	0	0	0	0	0	0	10	0	0	15	0	0	0	13	0	0	0	0	9	0	0	0	0	0	0	0	0	0	0	0	0	0	0	0
OTU1493	0	0	0	0	0	0	0	0	0	0	0	0	0	0	0	0	0	0	0	0	13	0	0	0	0	16	0	0	0	15	0	0	18	0	0	0	0	0	0	0	0	0	0	0	0	0	0	0	0
OTU1494	0	0	0	0	0	0	0	0	0	0	0	0	0	0	0	0	0	0	0	0	0	0	0	0	0	7	6	0	0	0	0	0	0	0	0	0	0	0	8	0	0	0	0	0	0	0	0	0	0
OTU1495	0	0	0	0	0	0	8	0	0	6	0	22	0	26	0	0	0	0	0	0	0	0	0	39	32	60	55	25	0	34	0	0	44	80	0	0	39	49	71	0	0	0	0	0	0	0	0	8	0
OTU1496	0	0	0	0	0	0	0	0	0	0	0	0	0	0	0	0	0	0	0	0	0	0	0	0	0	0	0	0	0	0	0	10	0	0	5	0	0	0	0	0	0	0	0	0	0	0	0	0	0
OTU1497	0	0	0	0	0	0	0	0	0	0	0	0	0	0	0	0	0	0	0	0	0	7	0	0	0	0	0	0	0	9	0	0	0	0	0	0	0	0	0	0	0	0	0	0	0	0	0	0	0
OTU1498	0	0	0	0	0	0	0	0	0	0	0	0	0	0	0	0	0	0	0	0	0	0	0	0	4	0	14	0	0	0	0	11	0	0	0	0	0	0	0	7	0	0	0	0	0	0	0	0	0
OTU1499	0	0	0	0	0	0	0	0	0	0	0	0	0	0	46	0	0	0	0	0	0	0	0	0	0	0	0	0	0	0	0	0	0	21	0	0	0	0	0	0	0	0	0	0	0	0	0	0	0
OTU1500	0	0	0	0	0	0	0	0	0	0	0	0	0	0	0	0	0	0	0	0	0	13	7	13	20	9	16	14	8	8	0	0	13	17	15	15	14	14	14	19	0	0	0	0	0	0	0	0	0
OTU1501	0	0	0	0	0	0	0	0	0	0	0	0	0	15	0	0	0	0	0	10	13	23	59	25	13	15	13	0	9	19	18	23	19	18	0	0	0	17	28	0	0	0	25	0	0	0	0	0	0
OTU1502	0	0	0	0	0	0	0	0	0	0	0	0	0	0	0	0	0	0	0	0	0	0	0	0	0	0	0	0	0	0	0	0	0	0	0	0	0	0	0	0	0	0	0	0	15	0	0	0	22
OTU1503	0	0	0	0	0	0	0	0	0	0	0	0	0	0	0	0	0	0	0	0	7	6	0	0	13	8	0	0	0	0	0	0	0	0	17	0	0	0	0	16	0	0	0	0	0	0	0	0	0
OTU1504	0	0	0	0	0	0	0	0	0	0	0	0	0	0	0	0	0	0	0	0	0	16	0	0	0	0	0	0	0	0	0	0	0	0	0	0	0	25	0	0	0	0	0	0	0	23	0	0	0
OTU1505	63	0	454	0	88	0	163	0	0	0	155	0	0	59	0	0	62	0	38	205	242	379	342	169	153	152	358	177	211	351	152	212	205	258	120	163	257	336	238	261	79	66	129	115	96	128	0	69	0
OTU1506	0	0	0	0	0	0	0	0	0	0	0	0	0	0	0	0	0	0	0	0	0	0	0	0	0	0	0	0	0	0	0	0	0	0	0	0	0	0	9	2	0	0	0	0	0	0	0	0	0
OTU1507	0	0	0	0	0	0	0	0	0	0	0	0	0	0	0	0	0	0	0	0	0	0	0	0	0	0	0	0	14	0	0	0	0	0	0	0	0	0	0	0	0	0	0	0	0	0	0	0	0
OTU1508	0	0	0	0	11	0	0	0	0	0	0	18	0	0	0	0	0	0	0	0	19	0	0	0	0	0	0	15	25	17	0	16	0	0	0	28	0	0	0	23	0	0	0	0	0	0	0	0	0
OTU1509	0	0	0	0	13	0	0	0	0	0	80	0	0	0	0	0	0	0	0	0	0	0	0	0	0	17	0	0	15	0	0	0	0	0	0	0	0	17	0	0	0	0	0	0	0	0	0	0	0
OTU1510	0	0	0	0	0	0	0	29	0	0	35	0	0	0	41	0	0	0	0	0	0	0	0	0	0	0	0	0	0	0	0	0	0	0	0	0	0	0	0	0	0	0	0	0	15	0	31	0	34
OTU1511	0	0	0	0	0	0	0	0	0	0	0	0	0	0	0	0	0	0	0	0	0	0	0	0	0	0	19	0	0	0	0	0	0	0	0	0	0	0	0	0	0	0	0	0	0	0	0	0	0
OTU1512	0	0	0	0	0	0	0	0	0	10	0	0	0	0	0	0	0	0	0	0	0	0	5	5	0	0	0	0	8	8	0	0	4	0	0	0	0	0	0	4	0	0	0	0	0	4	0	0	0
OTU1513	0	0	0	0	0	0	0	0	0	0	0	0	0	0	0	0	0	0	0	0	0	0	0	0	0	0	19	0	0	0	0	0	0	0	0	0	12	0	0	0	0	0	0	0	0	0	0	0	0
OTU1514	0	0	0	0	0	14	0	0	0	0	0	0	0	0	0	0	0	0	0	0	17	28	22	26	15	32	29	17	38	27	0	5	0	0	8	0	23	38	0	0	0	0	0	0	0	0	0	0	0
OTU1515	0	0	0	0	0	0	0	0	0	0	0	0	0	0	0	0	0	0	0	0	34	0	46	0	0	0	0	42	22	30	40	0	0	0	34	0	26	23	0	47	85	0	0	0	71	180	45	0	0
OTU1516	0	0	0	0	0	0	0	0	0	0	0	0	0	0	0	0	0	0	0	0	25	23	24	21	23	26	18	23	24	35	0	0	0	36	18	27	0	0	26	30	0	0	0	0	0	0	0	0	0
OTU1517	0	0	0	0	0	0	0	0	0	0	0	0	0	0	0	0	0	0	0	0	0	0	0	0	0	0	14	0	0	7	0	0	11	0	0	0	0	0	0	0	0	0	0	0	0	63	0	0	0
OTU1518	0	0	0	0	0	0	0	5	0	0	0	0	0	3	0	0	0	25	0	11	7	15	0	0	0	16	18	0	0	0	0	0	9	0	6	15	0	13	17	9	0	0	0	0	0	0	0	0	0
OTU1519	0	0	0	0	0	0	0	0	0	0	0	0	0	0	0	0	0	0	0	16	0	0	0	0	0	0	0	0	0	0	0	22	0	0	0	0	0	0	0	0	0	0	0	0	0	0	0	0	0
OTU1520	0	0	0	0	0	0	0	0	0	0	0	0	0	0	0	0	0	0	0	0	0	33	20	9	19	12	18	0	22	25	4	0	12	0	7	13	14	0	15	9	0	0	0	0	0	0	0	0	0
OTU1521	0	0	0	0	0	0	0	0	0	0	0	0	0	0	0	0	0	0	0	0	0	0	0	0	0	0	27	0	0	0	0	0	0	0	0	0	0	20	0	0	0	0	0	0	0	0	0	0	0
OTU1522	0	0	0	0	0	0	0	0	0	0	0	0	0	0	0	0	0	0	0	0	0	0	0	0	0	13	0	0	0	0	0	0	0	0	0	0	8	0	0	0	0	0	0	0	0	0	0	0	0
OTU1523	0	0	0	0	0	0	0	0	0	0	0	0	0	0	0	0	0	0	0	0	0	0	0	0	0	6	0	0	4	0	0	0	0	0	0	0	10	0	0	0	0	0	0	0	0	0	0	0	0
OTU1524	0	0	0	0	0	0	0	0	0	0	0	0	0	0	0	0	0	0	0	0	0	0	0	8	0	16	0	0	0	0	0	0	15	0	0	0	15	0	0	10	0	0	0	0	0	0	0	0	0
OTU1525	0	0	0	0	0	0	0	0	17	15	0	0	0	0	0	0	0	0	0	0	0	0	0	0	0	0	0	0	0	0	0	0	0	0	0	0	0	0	0	0	0	0	0	0	0	0	0	0	0
OTU1526	0	0	0	0	0	0	0	0	0	0	0	0	0	0	0	0	0	0	0	0	13	0	0	0	4	4	11	0	0	0	0	6	0	0	0	20	0	0	81	0	0	0	0	0	0	0	0	0	0
OTU1527	0	0	0	0	0	10	0	0	0	0	0	0	0	0	0	0	0	0	0	0	0	0	0	0	0	0	0	0	0	0	0	0	0	0	0	0	0	0	0	0	0	0	0	0	0	0	0	0	0
OTU1528	0	0	0	0	0	0	0	0	0	0	0	0	0	0	0	0	0	0	0	16	12	0	0	25	0	0	0	0	16	0	0	0	0	0	0	4	0	0	0	0	0	0	0	0	0	0	0	0	0
OTU1529	0	0	0	0	0	0	0	0	0	0	0	0	0	0	0	0	0	0	0	0	0	0	0	0	0	0	0	0	0	0	0	0	0	0	0	0	0	0	0	0	20	0	0	0	25	0	0	0	0
OTU1530	0	0	0	0	0	0	0	0	0	0	0	0	0	0	0	0	0	0	0	0	8	0	0	0	13	0	0	0	0	0	0	0	0	0	9	0	0	0	0	0	0	0	0	0	0	0	0	0	0
OTU1531	0	0	0	0	0	0	0	8	0	0	0	0	0	0	0	0	0	0	0	0	0	0	0	0	0	0	0	0	0	0	0	0	0	0	0	0	0	0	0	0	0	0	0	0	0	0	0	0	0
OTU1532	0	0	0	0	0	0	0	0	0	0	0	0	0	0	0	0	0	0	0	0	27	0	23	40	86	35	0	0	44	0	0	0	0	0	35	33	35	0	0	0	0	0	0	0	0	0	0	0	0
OTU1533	0	0	0	0	0	0	0	0	0	0	0	0	0	0	0	0	0	0	0	0	0	21	10	0	24	15	25	0	9	13	14	8	13	0	10	14	18	17	16	33	0	0	0	0	0	0	0	0	0
OTU1534	0	0	0	0	0	0	0	0	0	0	0	0	0	0	0	0	0	0	0	0	0	0	0	0	0	0	0	0	0	0	0	0	0	0	0	0	0	0	0	0	0	0	101	0	0	20	0	0	0
OTU1535	0	0	0	0	0	0	0	0	0	0	0	0	0	0	0	0	0	0	0	0	0	5	0	0	0	0	0	0	0	0	0	0	0	0	0	0	8	0	0	0	0	0	0	0	0	0	0	0	0
OTU1536	0	0	0	0	0	0	0	0	0	0	0	0	0	0	0	0	0	0	0	0	0	7	0	0	0	5	0	14	0	13	26	0	0	8	6	7	0	0	0	0	0	0	0	0	0	0	0	0	0
OTU1537	0	0	0	0	0	0	0	0	0	0	0	0	0	0	0	0	0	0	0	0	17	0	9	0	0	0	0	12	10	0	0	16	14	0	0	0	0	21	0	0	0	0	0	0	0	0	0	0	0
OTU1538	92	0	0	0	0	0	0	0	0	0	0	0	0	0	49	0	0	0	0	0	77	22	0	0	0	0	0	0	0	0	0	0	0	18	36	0	45	0	0	29	0	0	0	57	0	0	13	0	0
OTU1539	0	0	0	0	0	0	0	0	0	0	0	0	0	0	0	0	0	0	0	0	43	32	34	23	26	29	46	9	25	35	0	20	14	23	16	28	13	40	55	23	0	0	0	0	0	0	0	0	0
OTU1540	0	0	0	0	0	0	0	0	0	0	17	0	0	21	0	0	0	0	0	20	0	0	14	0	0	0	0	0	9	0	0	0	0	0	0	0	19	0	15	27	0	0	0	0	0	0	0	0	0
OTU1541	0	0	0	0	0	0	0	0	0	0	0	0	0	0	0	0	0	0	0	0	0	0	0	2	0	0	0	0	0	0	0	0	0	0	0	0	0	0	0	0	0	0	0	0	0	0	0	0	0
OTU1542	0	0	0	0	0	0	0	0	0	0	0	0	0	0	0	0	0	0	0	0	0	15	0	0	0	14	0	0	16	0	0	0	0	16	0	0	0	15	0	0	0	0	0	0	0	0	0	0	0
OTU1543	0	0	0	0	0	0	0	0	0	0	0	0	0	0	0	0	0	0	0	0	0	0	0	0	0	0	0	0	0	0	0	0	6	0	0	0	8	0	0	14	0	0	0	0	0	0	0	0	0
OTU1544	0	0	0	0	0	0	0	0	0	0	0	0	0	0	0	0	0	0	0	0	11	23	12	26	22	24	20	18	37	18	8	13	30	18	15	23	18	20	15	39	0	0	0	0	0	0	0	0	0
OTU1545	0	0	0	0	0	0	0	0	0	0	0	0	0	0	0	0	0	0	0	0	0	0	0	0	0	9	0	0	0	0	0	0	0	0	0	0	0	0	0	0	0	0	0	0	0	0	0	0	0
OTU1546	0	0	0	0	0	26	0	0	0	0	0	0	0	0	0	0	0	0	0	0	0	0	0	0	0	0	0	0	0	0	0	0	0	0	0	0	0	0	0	0	0	0	0	0	0	0	0	0	0
OTU1547	0	0	0	0	0	0	0	0	0	0	0	0	0	0	0	0	0	0	0	0	0	0	0	0	0	0	0	0	0	0	0	0	0	4	0	0	0	0	0	7	0	0	0	0	0	0	0	0	0
OTU1548	0	0	0	0	0	0	0	0	0	0	0	0	0	12	0	0	0	0	0	0	8	0	22	10	11	5	0	0	10	0	0	0	0	6	0	0	0	0	21	0	0	0	0	0	0	0	0	0	0
OTU1549	0	0	0	0	0	0	0	0	0	0	0	0	0	0	0	0	0	0	0	0	15	24	16	29	24	43	42	25	24	0	0	61	0	32	16	27	23	67	52	46	0	0	0	0	0	0	0	0	0
OTU1550	0	0	0	0	0	0	0	0	0	0	0	0	0	0	0	0	0	0	0	0	0	0	0	0	0	0	42	0	0	0	0	0	0	0	0	0	0	0	0	3	0	0	0	0	0	0	0	0	0
OTU1551	0	0	0	0	0	0	0	0	0	0	0	0	0	7	0	0	0	0	0	0	0	15	0	0	7	0	0	0	12	0	0	2	0	17	0	21	21	14	19	16	0	0	0	11	0	0	0	0	0
OTU1552	0	0	0	0	0	0	0	0	0	0	0	0	0	0	0	0	0	0	0	0	10	0	8	0	11	0	0	8	15	9	13	12	0	0	10	14	0	18	22	22	0	0	0	0	0	0	0	0	0
OTU1553	0	0	0	0	0	0	0	0	0	0	0	0	0	0	0	0	0	0	0	0	0	0	10	0	0	0	0	0	0	0	0	0	0	0	0	0	0	0	0	0	0	0	14	0	0	18	0	0	0
OTU1554	0	0	0	0	0	0	0	0	0	0	0	0	0	0	0	0	0	0	0	6	0	0	0	0	0	0	0	0	6	0	0	0	0	0	0	0	12	0	10	8	0	0	0	0	0	0	0	0	0
OTU1555	0	0	0	0	0	0	0	0	0	0	0	0	0	0	0	0	0	0	0	31	0	0	0	29	26	0	34	0	27	47	0	0	0	0	0	22	18	0	0	49	25	0	0	0	0	0	0	0	0
OTU1556	0	0	0	0	0	0	0	0	0	0	0	0	0	0	0	0	0	0	0	0	0	28	0	0	2	0	0	0	0	0	32	0	4	0	0	0	18	0	0	0	0	0	0	0	0	0	0	0	0
OTU1557	0	0	0	0	0	0	0	0	0	0	0	0	0	0	0	0	0	0	0	0	0	0	0	0	10	0	48	0	0	0	24	0	16	33	16	0	13	0	25	15	0	0	0	0	0	0	0	0	0
OTU1558	0	0	0	0	0	0	0	0	0	0	0	0	0	0	0	0	0	78	0	0	8	12	0	0	0	0	0	0	0	0	0	0	0	0	0	0	0	0	0	0	0	0	12	0	0	0	0	0	0
OTU1559	0	0	0	0	0	0	0	0	0	0	0	0	0	0	0	0	0	0	0	0	0	0	7	0	4	0	0	6	0	0	0	0	0	0	0	0	0	0	0	0	0	0	0	0	0	0	0	0	0
OTU1560	0	0	0	0	0	0	0	0	0	0	0	0	0	0	0	0	0	0	0	0	35	62	48	0	25	24	22	0	24	43	19	0	36	29	0	16	14	21	35	26	0	0	0	11	0	0	0	0	0
OTU1561	0	0	0	0	21	0	0	0	0	6	21	0	0	0	0	0	0	0	0	0	0	0	0	23	0	0	0	14	25	22	0	14	0	0	0	0	0	0	0	0	0	0	55	0	0	0	0	0	0
OTU1562	0	0	0	0	0	0	0	0	0	0	0	0	0	0	0	0	0	0	0	0	37	39	23	33	39	51	36	49	31	24	22	13	89	32	39	60	46	50	35	66	0	0	0	0	0	0	0	0	0
OTU1563	0	0	0	0	0	0	0	0	0	0	0	0	0	0	0	0	0	0	0	0	19	35	16	14	14	26	31	23	30	20	0	13	22	33	21	35	33	25	24	36	0	11	0	13	0	0	0	0	0
OTU1564	0	0	0	0	0	0	0	0	0	0	0	0	0	0	0	0	0	0	0	0	0	14	0	0	0	0	0	0	12	0	0	20	0	16	0	0	0	11	0	0	0	0	0	0	20	0	0	0	0
OTU1565	0	0	0	0	0	0	0	0	0	0	0	0	0	0	0	0	0	0	0	0	0	0	0	0	0	0	21	0	0	0	0	0	0	0	0	21	0	0	0	0	0	0	0	0	0	0	0	0	0
OTU1566	0	0	0	0	0	0	0	0	0	0	0	0	0	0	0	0	0	0	0	0	0	3	0	0	0	0	0	8	0	0	0	0	0	0	0	0	0	0	0	0	0	0	0	0	0	0	0	0	0
OTU1567	0	0	0	0	0	0	0	0	0	0	0	0	0	0	0	0	0	0	0	0	36	22	44	23	23	37	46	32	31	31	0	34	28	0	17	30	0	55	46	58	0	0	0	0	0	0	0	0	0
OTU1568	0	0	0	0	0	0	0	0	0	0	0	0	0	0	0	0	0	0	0	0	0	0	0	0	0	0	0	0	0	0	0	0	0	19	0	0	0	0	0	13	0	14	0	0	0	0	0	0	0
OTU1569	0	0	0	0	0	0	0	0	0	0	0	0	0	0	0	0	0	0	0	0	0	0	0	0	0	0	0	0	0	0	0	0	0	0	0	0	0	0	0	0	0	0	0	0	0	0	0	0	17
OTU1570	0	0	0	0	0	0	0	16	0	0	0	0	0	0	48	0	0	12	0	0	0	0	0	0	0	0	0	0	0	0	0	0	0	0	0	0	0	0	0	0	0	0	0	0	0	0	0	0	0
OTU1571	0	0	0	0	0	0	0	0	0	0	0	0	0	0	0	0	0	0	0	0	11	14	9	11	0	0	29	0	0	17	0	0	0	6	0	7	10	13	18	9	0	0	0	0	0	0	0	0	0
OTU1572	0	0	0	0	0	0	0	0	0	0	0	0	0	0	0	0	0	0	0	0	0	0	0	5	0	0	0	0	0	0	0	0	0	0	0	0	0	0	23	0	0	0	0	0	0	0	0	0	0
OTU1573	0	0	0	0	0	0	0	0	0	0	0	0	0	0	0	0	0	0	0	12	0	0	0	0	0	0	0	0	0	0	0	0	0	0	0	0	8	0	0	0	0	0	0	0	0	0	0	0	0
OTU1574	0	0	0	0	0	0	0	0	0	27	0	0	0	0	0	0	0	0	0	26	0	0	0	0	0	0	15	0	0	0	0	0	0	0	0	0	0	0	0	0	0	0	0	0	0	0	0	0	0
OTU1575	115	0	25	45	53	32	0	0	69	42	220	87	48	67	107	45	31	53	158	438	86	257	83	284	150	70	182	26	151	208	0	563	158	190	116	109	144	102	85	211	19	208	0	97	57	0	0	0	0
OTU1576	0	0	0	0	0	0	0	0	0	0	0	0	0	0	0	0	0	0	0	0	13	6	0	0	0	0	10	11	12	0	0	0	0	0	5	10	0	10	7	12	0	0	0	0	0	0	0	0	0
OTU1577	0	0	0	0	0	0	0	0	0	0	0	0	0	0	0	0	0	0	0	0	0	17	0	0	0	20	0	0	19	25	0	0	23	21	0	0	0	0	0	27	0	0	0	0	0	0	0	0	0
OTU1578	0	0	0	0	0	0	0	0	0	0	0	0	0	0	0	0	0	0	0	0	0	0	0	5	0	0	0	0	11	7	0	0	13	9	5	16	18	0	12	9	0	0	0	0	0	0	0	5	0
OTU1579	0	0	0	0	0	0	0	0	0	0	0	0	0	28	0	0	0	0	31	0	0	0	0	0	0	0	0	0	0	0	0	0	0	0	45	0	13	0	0	0	0	0	0	0	0	0	0	0	0
OTU1580	0	0	0	0	0	0	0	0	0	8	0	0	0	0	0	0	0	0	0	0	0	0	0	0	0	0	0	0	0	0	0	0	0	0	0	0	0	0	0	0	0	0	0	0	10	0	0	0	0
OTU1581	0	0	0	0	0	0	0	0	0	0	0	0	0	0	0	0	0	0	0	0	0	8	0	0	0	0	0	0	0	0	0	0	0	0	0	0	0	6	0	9	0	0	0	0	0	0	0	0	0
OTU1582	0	0	0	0	0	0	0	0	0	0	0	0	0	56	0	0	0	0	11	0	0	0	0	0	0	0	0	0	0	0	0	0	0	0	0	0	0	0	0	0	17	0	0	0	0	60	0	0	0
OTU1583	0	0	0	0	0	0	0	0	0	0	0	0	0	0	0	0	0	30	13	0	0	0	0	0	0	0	0	0	0	0	0	0	0	10	0	0	0	0	0	0	0	0	0	0	0	0	0	0	0
OTU1584	0	0	0	0	0	0	0	0	0	0	0	0	15	0	0	0	0	0	0	0	0	0	11	0	0	0	0	0	0	0	0	0	0	0	0	0	0	0	0	0	0	0	19	0	17	0	0	0	0
OTU1585	0	0	0	0	0	0	0	0	0	0	0	0	0	0	0	0	0	0	0	0	19	47	42	48	39	43	74	49	66	46	40	30	49	69	47	54	75	61	71	76	0	0	11	0	0	0	0	0	0
OTU1586	0	0	0	89	0	0	0	0	66	63	0	0	0	0	95	0	0	96	0	57	0	0	0	0	0	0	0	0	0	0	0	0	0	0	0	26	0	0	0	134	0	0	0	0	0	0	0	0	0
OTU1587	0	0	0	0	0	0	0	0	0	0	0	0	0	0	0	0	0	0	0	0	25	40	19	0	26	48	37	20	38	41	29	35	34	39	15	34	36	28	34	34	0	0	0	0	0	0	0	0	0
OTU1588	0	0	0	0	0	0	0	0	0	0	0	0	0	0	0	0	0	0	0	0	74	23	68	33	44	0	34	51	76	0	0	50	0	22	0	34	41	43	34	47	0	0	0	0	0	0	0	0	0
OTU1589	0	0	0	0	0	0	0	0	0	0	0	0	0	0	0	0	0	0	0	0	0	0	43	0	24	0	0	31	30	0	0	24	0	0	0	0	0	17	31	28	0	0	0	0	0	0	0	0	0
OTU1590	0	0	0	0	0	0	0	0	0	0	0	0	0	0	0	0	0	0	0	0	0	0	0	11	0	0	0	0	0	0	0	0	0	0	0	11	0	0	0	0	0	0	0	0	0	0	0	0	0
OTU1591	0	12	0	0	0	0	0	17	0	0	0	0	0	0	0	0	0	0	0	0	0	0	0	0	0	0	0	0	0	0	0	0	0	0	0	0	0	0	0	0	0	0	0	0	0	4	15	12	0
OTU1592	0	0	0	0	0	0	0	0	0	0	0	0	0	0	0	0	0	0	0	0	6	0	10	0	9	0	0	0	7	38	36	0	0	26	0	18	10	0	21	0	0	0	0	0	0	0	0	0	0
OTU1593	0	0	0	0	0	0	0	0	0	0	0	0	0	0	0	0	0	0	0	0	0	0	0	0	0	0	0	0	5	0	0	0	0	0	0	10	0	0	0	0	0	0	0	0	0	0	0	0	0
OTU1594	0	0	0	0	0	0	0	0	0	0	0	0	0	0	0	0	0	0	0	0	0	0	0	0	0	0	0	0	0	0	0	0	0	0	0	0	0	0	0	0	0	0	0	0	0	0	0	0	20
OTU1595	0	0	0	0	0	0	0	0	0	0	0	0	0	0	0	0	0	0	0	0	0	0	0	0	0	0	0	0	0	0	0	0	0	0	0	0	0	0	0	0	0	0	0	11	0	0	0	0	0
OTU1596	0	0	0	0	0	0	0	0	0	0	0	0	0	0	0	0	0	39	0	0	0	0	0	0	0	0	0	0	0	0	0	0	0	0	0	0	0	0	0	0	0	0	0	0	0	0	0	0	0
OTU1597	0	0	0	0	0	0	0	0	0	0	7	0	0	0	0	0	0	0	0	0	32	0	0	21	27	38	41	22	43	28	25	47	31	29	14	31	23	23	26	38	0	0	0	0	0	0	0	0	0
OTU1598	28	0	0	0	0	0	0	0	0	0	0	0	0	0	0	0	0	0	0	0	0	0	14	0	0	0	0	0	0	12	0	0	0	0	0	0	0	0	0	0	0	0	0	0	0	0	0	0	0
OTU1599	0	0	0	0	56	0	0	0	0	0	0	0	0	0	0	0	0	0	0	0	0	0	24	0	0	0	0	0	0	0	0	0	0	0	0	0	12	0	0	0	0	0	0	0	0	0	0	0	0
OTU1600	0	0	0	0	0	0	0	0	0	0	0	0	0	0	0	0	0	0	0	0	0	34	0	0	0	22	0	0	0	0	0	0	0	0	0	0	0	0	0	0	0	0	0	0	0	0	0	0	0
OTU1601	0	0	0	0	0	0	0	0	0	0	0	0	0	0	0	0	0	0	0	0	0	0	0	0	0	0	14	0	0	0	0	0	0	14	0	0	0	0	0	11	0	0	0	0	0	0	0	0	0
OTU1602	0	0	0	0	0	0	0	7	0	0	0	0	0	0	0	0	0	0	0	0	0	0	35	77	26	81	35	0	43	0	84	39	0	125	24	41	96	41	165	0	0	0	0	0	0	0	0	0	0
OTU1603	0	0	0	0	0	0	0	0	0	0	0	0	0	0	0	0	0	0	0	0	0	0	0	0	0	0	7	0	0	0	0	0	0	0	0	0	0	0	11	0	0	0	0	0	0	0	0	0	0
OTU1604	0	0	0	0	0	0	0	0	0	0	0	0	0	0	0	0	0	0	0	0	0	0	0	0	0	0	5	0	0	0	0	0	0	0	0	0	0	0	0	0	0	0	0	0	0	0	0	0	0
OTU1605	0	0	0	0	0	0	0	0	0	0	0	0	0	0	0	0	0	0	0	0	0	0	0	0	0	0	0	0	0	7	0	0	0	0	0	0	5	0	0	0	0	0	0	0	0	0	0	0	0
OTU1606	0	0	0	0	65	0	0	0	0	0	0	0	0	0	0	0	0	0	0	0	0	17	0	19	21	0	0	23	28	53	26	0	0	0	23	23	18	20	0	32	0	8	31	5	0	0	0	0	0
OTU1607	0	0	0	0	0	0	0	0	0	0	4	0	0	0	0	0	0	0	0	0	0	0	0	0	20	0	0	0	0	0	0	0	0	0	0	0	0	0	0	0	0	0	31	0	0	0	0	0	0
OTU1608	0	0	0	0	0	0	0	0	0	0	0	0	0	0	0	0	0	0	0	0	3	6	0	0	0	0	0	0	0	0	0	0	0	0	0	9	9	0	0	0	0	0	0	0	0	0	0	0	0
OTU1609	0	0	0	0	0	0	0	0	0	0	0	0	0	0	0	0	0	0	0	0	0	0	0	0	0	0	0	0	0	0	0	8	0	0	0	0	0	0	0	0	0	0	0	0	0	0	0	0	0
OTU1610	0	0	0	0	0	0	0	0	0	0	0	0	0	0	0	0	0	0	0	0	18	49	44	0	27	23	25	0	31	32	47	39	49	28	0	41	31	29	33	49	38	0	31	0	0	191	0	12	0
OTU1611	0	0	0	0	0	0	0	0	0	0	0	0	0	0	0	0	0	0	0	0	0	0	0	0	0	0	0	0	0	0	0	0	0	0	0	0	0	0	0	0	0	0	0	0	0	0	0	0	0
OTU1612	0	0	0	0	0	0	0	0	0	0	0	0	0	0	0	0	0	0	0	0	0	0	0	0	0	15	0	0	0	0	0	0	33	0	0	0	0	0	0	0	0	0	73	0	0	0	0	0	0
OTU1613	0	0	0	0	0	0	0	0	0	0	0	0	0	0	0	0	0	0	0	0	0	0	0	27	0	25	28	24	0	0	28	0	0	30	23	41	33	51	34	34	0	0	0	0	0	0	7	0	0
OTU1614	0	0	0	0	0	0	0	0	0	0	0	0	0	0	0	0	0	0	0	0	54	59	55	61	58	57	81	69	77	59	58	56	68	74	48	92	64	91	125	125	0	0	0	0	0	0	0	0	0
OTU1615	0	0	0	0	0	0	0	0	0	0	0	0	19	0	0	0	0	14	0	0	0	0	0	0	0	0	0	0	0	0	0	5	0	0	0	0	10	0	0	0	0	0	0	0	0	0	0	0	0
OTU1616	0	0	0	0	0	0	0	0	0	0	0	0	0	0	0	0	0	0	0	0	0	10	0	0	0	10	8	0	0	7	0	0	0	0	10	25	0	0	0	0	0	0	0	0	0	0	0	0	0
OTU1617	0	0	0	0	0	0	0	0	0	0	0	0	0	44	0	0	0	0	0	0	57	53	2	128	153	103	30	0	0	79	94	25	0	99	30	69	12	0	104	12	0	0	0	0	0	0	0	0	23
OTU1618	0	0	0	0	0	0	0	0	0	0	0	0	0	0	0	0	0	0	0	0	0	0	15	0	0	22	10	28	0	15	24	0	0	0	0	0	0	0	0	0	0	0	0	0	0	0	9	0	0
OTU1619	0	0	0	0	0	0	0	0	0	0	0	0	0	0	0	0	0	0	0	0	0	0	3	0	0	0	0	0	0	0	0	17	0	0	0	0	0	0	0	0	0	0	0	0	0	0	0	0	0
OTU1620	0	0	0	0	13	0	0	0	0	0	0	0	0	0	0	0	0	0	0	0	0	0	0	0	14	0	0	0	0	0	0	0	15	0	0	0	0	0	0	0	0	0	0	0	0	0	0	0	0
OTU1621	0	0	0	0	0	0	31	0	0	0	0	0	0	0	0	0	0	0	0	0	0	0	0	0	0	0	0	0	0	0	0	0	0	0	0	0	0	0	0	0	0	0	0	0	0	0	30	0	36
OTU1622	0	0	0	0	0	10	0	0	0	0	0	0	0	0	0	0	0	0	0	0	0	0	0	0	0	0	0	6	0	0	0	0	0	0	0	0	0	0	9	0	0	0	0	0	0	0	0	0	0
OTU1623	0	0	0	0	0	0	0	0	0	0	0	0	0	0	0	0	0	0	0	0	20	48	26	41	30	37	25	17	39	24	16	14	32	20	32	36	40	38	39	55	0	0	0	0	0	0	0	0	0
OTU1624	22	0	0	0	0	0	0	0	0	0	0	0	0	0	0	0	0	0	0	0	16	32	0	0	0	42	24	0	33	0	0	0	0	32	29	25	0	21	0	0	0	0	0	0	0	0	0	0	31
OTU1625	0	0	0	0	0	0	0	0	0	0	7	0	0	0	0	0	0	0	0	0	0	0	0	0	0	0	0	0	0	0	0	0	0	0	0	0	0	0	0	0	0	0	0	0	0	0	0	0	0
OTU1626	0	0	0	0	0	0	0	0	0	0	0	0	0	0	0	0	0	0	0	0	0	0	0	0	0	0	0	0	0	0	0	0	7	0	0	0	0	0	0	12	0	0	0	0	0	0	0	0	0
OTU1627	98	29	23	25	52	0	0	33	0	25	296	41	0	33	68	20	0	0	13	77	74	69	83	41	44	42	47	30	55	91	109	232	37	96	76	66	39	79	102	60	23	26	0	21	0	0	0	0	59
OTU1628	0	0	0	0	0	0	0	0	0	0	49	0	0	13	0	0	0	0	0	47	0	0	0	31	0	0	47	34	35	33	54	25	23	41	0	65	0	0	46	32	0	0	0	0	0	0	0	0	0
OTU1629	0	0	0	0	0	0	0	0	0	0	0	0	0	0	0	0	0	0	0	0	0	0	0	0	0	0	0	17	0	0	0	0	0	0	0	21	0	0	0	0	0	0	0	0	0	0	0	0	0
OTU1630	0	0	0	0	0	0	0	0	0	0	0	0	0	0	0	0	0	0	0	0	0	0	0	0	0	0	0	12	0	0	0	0	0	0	0	0	9	0	0	0	0	0	0	0	0	0	0	0	0
OTU1631	0	0	0	0	0	0	0	0	0	0	0	0	0	0	0	0	0	0	0	0	0	0	6	0	13	0	0	10	0	0	0	0	0	0	13	0	0	18	11	11	0	0	0	0	0	0	0	0	0
OTU1632	0	0	0	0	0	0	0	0	0	0	0	0	0	0	0	0	0	0	0	0	0	6	0	0	8	0	0	0	0	0	0	0	0	0	0	0	0	0	0	9	0	0	0	0	0	0	0	0	0
OTU1633	0	0	0	0	0	0	0	0	0	0	0	0	0	0	0	0	0	0	0	0	0	0	0	0	0	0	0	0	0	0	0	0	0	35	0	0	0	0	13	0	0	64	0	0	0	0	0	0	0
OTU1634	0	0	0	0	0	0	0	0	0	0	0	0	0	0	0	0	0	0	0	0	0	0	0	0	0	0	0	0	0	0	0	0	0	0	0	0	13	0	0	6	0	0	0	0	0	0	0	0	0
OTU1635	0	0	0	0	0	0	0	0	0	0	0	0	0	0	0	0	0	0	0	0	0	0	0	0	0	0	0	4	0	0	0	0	7	0	0	0	0	0	0	0	0	0	0	0	0	0	0	0	0
OTU1636	0	0	0	0	10	0	0	0	0	0	0	0	0	0	0	0	0	0	0	0	31	18	20	16	27	16	28	19	31	22	0	11	26	16	18	53	17	33	27	26	0	0	0	0	0	0	0	0	0
OTU1637	0	0	0	0	0	0	0	0	0	0	0	0	0	0	0	0	0	0	0	0	0	0	6	0	0	0	0	0	6	0	0	0	0	0	0	0	0	0	0	0	0	0	0	0	0	0	0	0	0
OTU1638	0	0	0	0	0	0	0	0	0	0	0	0	0	0	0	0	0	0	0	0	0	0	0	0	3	0	22	0	0	0	16	97	0	0	0	0	0	65	0	0	0	0	0	0	0	0	0	0	0
OTU1639	0	0	10	0	13	80	0	0	0	0	0	0	0	0	9	0	0	0	0	25	0	16	0	12	16	15	14	9	0	0	0	13	6	31	7	18	0	0	25	0	0	9	0	13	6	0	0	0	0
OTU1640	0	0	0	0	0	0	0	0	0	0	0	0	0	13	0	0	0	0	0	21	0	9	0	0	0	0	22	0	12	0	0	14	10	42	0	24	35	21	18	31	0	0	0	0	0	0	0	0	0
OTU1641	0	0	0	0	0	0	0	0	0	0	0	0	0	0	0	0	0	0	0	0	0	0	0	0	0	0	16	0	0	0	0	0	0	0	0	0	9	0	0	24	0	0	0	0	0	0	0	0	0
OTU1642	0	0	0	0	0	0	0	0	0	0	0	0	0	0	0	0	0	0	0	0	0	7	0	0	0	0	10	0	0	0	0	0	0	0	0	0	0	0	0	12	0	0	17	0	0	0	0	0	0
OTU1643	0	0	0	0	0	0	0	0	0	0	0	0	0	0	0	0	0	0	0	0	0	0	0	0	0	0	0	5	0	0	0	0	0	0	7	0	0	0	0	0	0	0	0	0	0	14	0	0	0
OTU1644	0	0	0	0	50	0	0	0	0	0	0	0	24	0	0	0	0	0	0	0	0	0	9	0	0	0	0	0	0	0	0	0	9	0	0	0	0	0	0	0	0	0	0	0	0	0	0	0	0
OTU1645	0	0	0	0	0	0	0	0	0	13	16	0	0	0	0	0	0	0	0	0	0	0	0	0	0	0	0	0	0	0	0	0	0	0	0	0	0	15	0	0	0	0	0	0	0	0	0	0	0
OTU1646	0	0	0	0	0	0	0	0	0	0	0	0	0	0	0	0	0	0	0	0	0	0	0	0	6	0	0	0	0	0	0	0	0	0	0	0	0	0	0	0	0	0	0	0	0	0	0	0	0
OTU1647	0	0	0	0	0	0	0	0	0	0	0	0	0	0	0	0	0	0	0	0	0	0	0	0	0	0	0	0	0	15	0	0	0	0	12	0	0	0	0	0	0	0	0	0	0	0	0	0	0
OTU1648	0	0	0	0	0	0	0	0	0	0	0	0	0	0	0	0	0	0	0	0	23	26	0	28	0	29	17	0	26	20	0	27	37	0	0	0	29	17	31	22	0	0	0	0	0	0	0	0	0
OTU1649	0	0	0	0	0	0	0	0	0	0	0	0	0	0	0	0	0	0	0	0	0	0	0	0	0	0	0	0	0	0	0	0	0	0	0	0	0	0	0	0	20	0	22	0	11	38	0	0	0
OTU1650	0	0	0	0	0	0	0	0	0	0	0	0	0	0	0	0	0	0	0	0	0	0	0	0	0	0	0	0	0	0	0	0	0	0	0	0	0	0	0	22	0	0	0	0	0	0	0	0	0
OTU1651	0	0	0	0	0	42	16	0	15	97	14	88	177	0	164	63	0	48	196	244	91	116	95	75	0	89	139	89	23	96	56	157	0	91	48	22	60	86	122	128	67	0	252	34	76	86	0	59	101
OTU1652	0	0	0	0	0	0	0	0	0	17	0	0	0	0	0	0	0	0	0	0	0	64	24	0	0	0	0	0	26	0	42	0	0	0	50	0	12	0	136	0	13	0	35	0	0	0	0	0	0
OTU1653	0	0	0	0	0	0	0	0	0	0	0	0	0	0	0	0	0	0	0	0	0	0	0	0	0	0	0	0	0	18	0	0	0	23	0	0	0	0	17	0	0	0	0	0	0	0	0	0	0
OTU1654	0	0	0	0	19	0	0	0	0	0	0	0	0	35	0	0	0	0	0	53	67	129	86	97	87	80	104	98	81	109	80	139	98	98	135	107	110	94	136	154	0	0	0	0	0	0	0	0	0
OTU1655	0	0	0	0	0	0	0	0	0	0	0	0	0	0	0	0	0	0	0	0	0	6	0	0	0	4	0	0	0	0	0	0	9	0	0	5	0	0	0	0	0	0	0	0	0	0	0	0	0
OTU1656	0	0	0	0	0	0	0	0	0	0	0	0	0	0	0	0	0	0	0	0	0	0	0	0	0	2	0	9	0	0	0	0	7	6	0	0	10	0	0	0	0	0	0	0	0	0	0	0	0
OTU1657	0	0	393	0	24	0	0	0	0	0	39	40	0	0	0	0	0	0	0	147	49	88	44	70	0	82	161	77	119	60	28	98	71	62	16	72	78	56	58	84	0	0	0	39	0	101	22	0	0
OTU1658	0	0	0	0	0	0	0	0	0	17	0	0	0	0	0	0	0	0	0	0	66	0	63	100	83	0	0	0	0	230	71	0	16	60	12	0	16	0	78	0	0	0	0	0	0	0	0	0	0
OTU1659	0	0	0	0	0	0	0	0	0	0	0	0	0	0	0	0	0	0	0	0	0	19	0	0	0	0	0	0	0	14	0	0	0	0	0	0	0	0	0	0	0	0	0	0	0	0	0	0	0
OTU1660	0	0	0	0	0	0	0	0	0	0	0	0	0	0	0	0	0	0	0	0	0	0	55	72	63	79	103	26	0	0	0	50	70	81	0	0	63	0	58	0	0	0	0	0	0	0	0	0	0
OTU1661	0	0	0	0	0	0	0	0	0	0	0	0	0	0	0	0	0	0	0	0	0	0	0	0	0	0	0	0	0	0	0	0	0	0	0	0	29	0	8	0	0	0	0	0	0	0	0	0	0
OTU1662	0	0	0	0	0	0	0	0	0	0	0	0	0	0	0	0	0	0	0	0	0	0	10	0	0	0	16	0	0	0	0	0	0	0	0	0	0	0	0	0	0	0	0	0	0	0	0	0	0
OTU1663	0	0	0	0	0	0	0	0	0	0	0	0	0	0	0	0	0	0	0	0	16	0	0	0	0	20	51	0	45	35	0	49	42	59	17	25	0	29	44	80	0	0	0	0	0	0	0	0	0
OTU1664	0	0	0	0	0	0	0	0	0	0	0	0	0	0	0	0	0	0	0	0	0	0	0	7	0	0	0	0	0	0	6	26	0	0	0	0	0	0	0	0	0	0	0	0	0	0	0	0	0
OTU1665	0	0	0	0	0	0	0	0	0	0	0	0	0	0	0	0	0	0	0	0	0	0	0	0	0	17	0	0	0	0	0	0	0	11	0	0	0	0	0	0	0	0	0	0	0	0	0	0	0
OTU1666	0	0	0	22	0	0	76	0	0	0	0	0	0	0	0	0	0	0	0	0	0	33	0	17	0	0	31	0	0	0	0	0	0	0	0	0	20	0	0	0	0	0	0	0	3	0	0	0	0
OTU1667	0	0	0	0	0	0	0	0	0	0	0	0	0	0	0	0	0	0	0	0	0	0	0	0	0	0	0	0	0	0	0	0	0	0	0	0	0	25	0	15	0	0	0	0	0	0	0	0	0
OTU1668	0	0	0	0	0	0	0	0	0	0	0	0	0	0	0	0	0	0	0	0	20	43	14	25	16	16	19	21	0	14	18	18	39	22	20	0	0	25	0	36	0	0	0	0	0	0	0	0	0
OTU1669	0	0	0	0	0	0	0	0	0	0	0	0	0	0	0	0	0	0	0	0	0	0	0	0	0	0	0	12	0	0	0	0	0	0	0	0	6	0	0	0	0	0	0	0	0	0	0	0	0
OTU1670	0	0	0	0	0	0	0	0	0	0	0	0	0	0	0	0	0	0	0	0	0	0	0	0	0	0	0	0	0	0	0	0	0	0	0	0	0	0	0	0	0	0	0	0	0	0	0	0	0
OTU1671	0	0	0	0	0	0	0	0	0	0	0	0	0	0	0	0	0	0	0	0	0	0	0	0	0	0	0	0	0	0	0	0	0	0	0	0	0	0	0	0	0	0	0	0	0	0	0	0	0
OTU1672	0	0	0	0	12	0	0	0	0	0	0	0	0	0	38	0	0	0	0	0	0	0	0	0	0	0	0	0	0	0	0	0	0	0	0	0	0	0	0	0	0	0	0	0	0	0	0	0	0
OTU1673	0	0	0	0	0	0	0	0	0	0	0	0	0	0	0	0	0	0	0	0	0	0	0	0	0	0	0	0	0	0	0	0	0	0	0	0	0	0	0	0	0	0	0	0	0	0	0	0	0
OTU1674	0	0	0	0	14	0	0	0	0	0	16	0	0	54	0	0	0	0	0	35	52	57	62	53	70	57	55	60	55	67	37	51	100	66	45	63	72	67	77	97	0	16	35	0	0	0	0	0	0
OTU1675	0	0	0	0	0	0	0	0	0	0	0	0	0	0	0	0	0	0	0	0	0	11	0	0	19	0	0	0	0	0	0	0	0	0	0	0	0	0	8	10	0	0	0	0	0	0	0	0	0
OTU1676	0	0	0	0	0	0	0	0	0	0	0	0	0	0	0	0	0	0	0	0	0	0	0	0	0	0	7	4	0	0	0	0	0	0	0	0	0	10	0	14	0	0	38	0	0	0	0	0	0
OTU1677	0	0	0	0	0	0	0	0	0	0	0	0	0	0	0	0	0	0	0	0	0	0	0	0	10	0	0	0	0	5	0	0	0	16	0	0	0	0	0	0	0	0	0	0	0	0	0	0	0
OTU1678	0	0	0	0	0	0	0	0	0	0	0	0	0	0	0	0	0	0	0	0	20	0	7	0	0	0	0	0	14	8	0	0	0	0	13	0	0	0	0	0	0	0	0	0	0	0	0	0	0
OTU1679	0	0	0	0	0	0	0	0	0	0	0	0	0	0	0	0	0	0	0	0	0	0	0	0	0	0	0	0	0	0	0	0	0	0	0	0	0	0	0	0	0	0	0	0	0	0	0	0	0
OTU1680	0	74	0	0	0	0	58	0	0	0	86	26	44	30	0	0	0	0	52	99	267	352	203	251	309	278	366	328	397	360	253	103	323	392	213	214	392	618	514	517	0	85	344	20	20	0	0	0	0
OTU1681	0	0	0	0	0	0	0	0	0	0	0	0	0	0	0	0	0	0	0	0	0	6	0	0	0	0	0	0	0	0	0	10	0	0	0	0	0	0	0	0	0	0	0	0	0	20	0	0	0
OTU1682	0	0	0	0	0	0	0	0	0	0	0	0	0	0	0	0	0	0	0	0	0	0	0	0	0	0	0	0	0	0	0	0	0	0	0	0	0	0	11	0	0	0	0	0	0	0	0	0	0
OTU1683	0	0	0	0	0	0	0	0	0	15	0	0	0	0	0	0	0	0	0	0	0	0	0	0	0	0	0	0	0	0	0	0	0	0	0	0	0	0	0	0	0	0	0	0	0	0	0	0	0
OTU1684	0	0	0	0	0	0	0	0	0	0	0	0	0	0	0	0	0	0	0	0	0	43	23	25	31	31	44	34	46	24	0	30	23	0	28	30	21	19	0	34	0	0	0	0	0	0	0	0	0
OTU1685	7	0	8	0	0	0	0	0	0	0	0	0	0	0	23	0	0	0	0	0	16	15	16	0	0	0	0	13	0	0	7	0	2	71	0	18	0	0	13	0	0	0	42	6	0	0	0	0	22
OTU1686	0	0	0	0	0	0	0	0	0	0	0	0	0	0	0	0	0	0	0	0	0	17	0	20	0	35	0	0	0	0	0	0	0	0	0	0	0	0	17	21	0	0	0	0	0	0	0	0	0
OTU1687	0	10	0	0	0	13	0	0	0	0	0	0	6	0	0	0	0	5	0	29	0	20	19	0	8	17	19	9	12	0	0	22	22	18	0	37	33	27	22	25	0	0	0	0	4	0	0	0	0
OTU1688	0	0	0	0	0	0	0	0	0	0	0	0	0	0	0	0	0	0	0	0	14	18	0	0	0	14	22	18	20	16	0	0	0	0	0	0	18	0	16	27	0	0	0	0	0	0	0	0	0
OTU1689	0	0	0	0	0	0	0	0	0	0	0	0	0	0	0	0	0	0	0	0	0	0	0	0	10	17	0	0	0	0	0	8	0	0	0	0	0	0	0	15	0	0	0	0	0	0	0	0	0
OTU1690	0	0	0	0	0	0	0	0	0	0	0	0	0	0	0	0	0	0	0	0	0	0	0	0	8	0	0	0	0	0	0	0	0	15	0	0	0	12	9	0	0	0	0	0	0	0	0	0	0
OTU1691	0	0	0	0	0	0	0	0	0	0	0	0	0	58	0	0	0	0	0	94	122	148	0	142	213	103	130	111	168	127	81	230	172	194	172	238	118	301	182	295	16	18	0	12	0	0	0	0	0
OTU1692	0	0	0	0	0	0	0	0	0	0	0	0	0	0	0	0	0	0	0	0	0	0	0	0	0	0	0	0	0	0	0	0	0	0	0	0	0	0	0	0	0	0	0	0	41	90	0	0	0
OTU1693	0	0	0	0	0	0	0	0	0	0	0	0	0	0	0	0	0	0	0	0	0	0	0	0	0	0	0	0	0	0	0	0	0	0	0	0	0	0	6	0	0	0	0	0	0	0	0	0	0
OTU1694	0	0	0	0	0	0	0	0	0	0	0	0	0	0	0	0	0	0	0	0	0	0	0	0	0	0	0	0	0	6	0	0	0	0	0	0	0	5	0	0	0	0	9	0	0	0	0	0	0
OTU1695	0	0	0	0	0	0	0	0	0	0	0	0	0	0	0	0	0	0	0	0	0	7	21	0	0	0	0	0	0	0	24	0	0	0	0	0	0	0	0	0	27	0	0	0	0	0	0	0	0
OTU1696	0	0	0	0	0	0	0	0	0	0	0	0	0	0	0	0	0	0	0	0	6	0	0	0	7	0	0	0	11	0	0	8	10	0	0	0	0	6	0	6	0	0	0	0	0	0	0	0	0
OTU1697	0	0	0	0	0	0	0	0	0	0	0	0	0	0	0	0	0	0	0	0	0	0	0	0	0	0	0	8	0	0	0	0	0	0	0	0	0	0	0	0	0	0	0	0	0	0	0	0	0
OTU1698	35	42	0	0	334	0	0	0	0	0	0	112	0	149	0	0	0	0	0	35	262	370	417	214	320	310	289	187	294	322	262	0	203	284	159	282	230	361	308	164	0	0	85	52	0	0	0	0	0
OTU1699	0	0	0	0	0	0	0	0	0	0	0	0	0	0	0	0	0	0	0	0	0	0	0	0	0	0	0	0	0	0	0	0	0	0	0	0	0	0	0	0	0	0	13	0	0	0	0	9	0
OTU1700	0	0	0	0	0	0	0	0	0	0	0	0	0	0	0	0	0	0	0	0	0	0	0	0	0	0	11	0	0	0	0	0	0	0	0	0	0	0	0	0	0	0	12	0	0	0	0	0	0
OTU1701	0	0	0	0	0	0	0	0	0	0	0	0	0	0	0	0	0	0	0	0	33	0	0	0	0	0	0	0	22	24	0	0	0	0	0	0	0	0	0	0	0	0	0	0	0	0	0	0	0
OTU1702	0	0	0	0	22	11	0	0	0	0	0	0	12	63	0	0	0	0	0	139	21	45	66	51	0	0	56	0	0	91	67	153	27	158	56	0	37	69	0	118	0	0	62	15	0	0	0	0	0
OTU1703	0	0	0	0	0	0	0	0	0	0	0	0	0	0	0	0	0	0	0	0	0	0	0	0	0	0	0	0	0	0	0	0	0	0	0	0	0	0	0	0	0	0	23	0	0	72	0	0	0
OTU1704	0	0	0	0	10	0	0	0	0	0	0	0	0	0	0	0	0	0	0	0	0	0	0	0	0	0	21	0	0	14	15	0	0	18	21	0	17	16	15	22	0	0	0	0	0	0	0	0	0
OTU1705	0	0	0	0	0	0	0	0	0	0	0	0	0	0	0	0	0	0	0	0	18	0	14	46	29	0	31	49	26	0	0	33	33	33	16	55	48	27	0	0	0	0	0	0	0	0	0	0	0
OTU1706	0	0	0	0	0	0	0	0	0	0	0	0	0	0	0	0	0	0	0	0	0	9	11	0	0	0	20	12	0	0	0	0	0	0	11	0	0	18	12	23	0	0	15	0	0	0	0	0	0
OTU1707	0	0	0	0	0	37	0	0	0	0	0	0	0	0	0	0	0	0	0	0	0	0	0	0	0	0	0	0	0	0	0	0	0	0	0	0	0	0	0	0	0	0	0	0	0	0	0	0	0
OTU1708	0	0	0	0	39	0	0	0	0	0	0	0	0	0	0	0	0	18	0	0	0	0	0	0	0	0	0	0	0	0	0	0	0	0	0	0	0	0	0	0	0	0	0	0	0	0	0	0	0
OTU1709	0	0	0	0	0	0	0	0	0	0	0	0	0	0	0	0	0	0	0	0	0	0	0	0	5	0	0	0	0	8	0	0	0	0	0	0	0	3	0	0	0	0	0	0	0	0	0	0	0
OTU1710	0	0	0	0	0	0	0	0	0	0	178	0	0	0	0	0	0	0	0	0	0	29	0	73	0	0	133	47	24	51	40	0	0	24	10	0	73	35	0	0	0	0	0	64	0	53	0	0	0
OTU1711	0	0	0	0	0	0	0	0	0	0	0	0	0	0	0	0	0	0	0	0	11	0	0	0	0	0	0	0	3	0	0	0	0	7	0	9	4	0	0	5	0	0	0	0	0	0	0	0	0
OTU1712	0	0	0	0	0	0	0	0	0	0	0	0	0	0	0	0	0	0	0	0	0	0	0	0	0	0	0	0	0	0	0	0	0	0	0	0	0	0	0	8	0	0	0	0	0	0	0	0	0
OTU1713	47	0	0	0	0	0	0	0	5	0	0	0	0	0	0	0	0	0	0	0	0	0	0	0	0	0	0	0	17	9	0	0	0	0	0	0	0	0	0	0	0	0	83	50	0	0	0	0	0
OTU1714	6	17	0	0	132	0	0	15	0	10	4	0	29	0	60	52	0	0	57	0	19	0	0	13	7	34	0	0	35	19	20	40	18	25	0	21	0	30	0	46	0	12	0	0	4	0	27	13	0
OTU1715	0	0	0	0	0	0	0	0	0	0	0	0	0	0	0	0	0	0	0	0	4	11	0	0	7	0	10	7	5	14	0	0	0	0	0	0	0	0	0	10	0	0	0	0	0	0	0	0	0
OTU1716	0	0	0	0	0	0	0	0	0	0	0	0	0	0	0	0	0	0	0	0	0	0	0	0	0	0	0	0	0	8	0	0	0	0	0	0	0	0	0	3	0	0	0	0	0	0	0	0	0
OTU1717	0	0	0	0	0	0	0	0	0	0	0	0	0	0	0	0	0	0	0	0	0	0	0	0	0	0	0	32	0	0	0	0	0	0	0	0	0	0	0	11	0	0	0	0	0	0	0	0	0
OTU1718	0	0	0	0	0	0	0	0	0	0	0	0	9	0	0	0	0	0	0	0	14	26	6	33	6	7	12	0	0	37	6	0	0	4	0	0	0	0	0	0	0	0	0	0	0	0	0	0	0
OTU1719	0	0	0	0	0	0	0	0	0	0	0	0	0	0	0	0	0	0	0	0	24	32	33	29	47	36	34	19	29	33	28	13	63	53	43	48	56	40	36	85	0	0	0	0	0	0	0	0	0
OTU1720	0	0	0	0	0	0	0	0	0	0	0	0	0	0	0	0	0	0	0	0	0	0	21	19	0	0	0	18	25	21	0	0	14	0	0	0	0	9	0	27	0	0	0	0	0	0	0	0	0
OTU1721	0	0	0	0	0	0	0	0	0	0	0	0	0	0	0	0	0	0	0	0	0	0	0	0	29	24	28	0	0	0	0	19	0	0	0	0	0	0	14	0	0	0	0	0	0	0	0	0	0
OTU1722	0	0	0	0	0	0	0	0	0	0	0	0	0	0	0	0	0	0	0	0	12	10	0	10	0	0	10	9	0	0	0	11	0	0	0	0	0	9	25	9	0	0	0	8	0	0	0	0	22
OTU1723	0	0	0	0	0	0	0	0	0	0	0	0	0	0	0	0	0	0	0	0	0	0	7	0	0	0	0	0	22	0	0	0	0	0	0	0	0	17	17	0	0	0	0	0	0	17	0	0	0
OTU1724	0	0	0	6	0	6	0	0	0	0	0	0	0	0	0	0	0	0	0	0	0	0	0	0	0	0	0	0	0	0	0	0	0	0	0	0	0	0	0	0	0	0	0	0	0	19	0	0	0
OTU1725	0	0	0	0	24	0	0	0	0	0	0	0	0	0	0	0	0	0	0	29	32	29	18	39	49	59	25	30	64	76	35	86	28	44	29	36	60	36	63	105	0	12	0	11	0	0	0	0	0
OTU1726	0	0	0	0	0	0	0	0	0	0	0	0	0	0	0	0	0	0	0	0	27	19	23	20	31	27	30	17	54	30	0	0	21	20	23	0	41	22	21	52	0	0	0	0	0	0	0	0	0
OTU1727	0	0	0	0	0	0	0	0	0	0	0	0	0	0	0	0	0	0	0	0	0	0	0	0	0	0	0	0	0	0	0	0	0	0	0	0	0	0	0	0	0	0	0	0	0	0	0	0	0
OTU1728	0	0	0	0	0	0	0	0	0	0	0	0	0	0	0	0	0	0	0	0	0	0	0	0	0	0	0	0	0	0	0	0	0	0	4	0	0	0	9	0	0	0	0	0	0	0	0	0	0
OTU1729	0	0	0	19	0	0	0	0	9	0	0	0	48	0	18	0	0	0	8	0	11	0	0	9	0	0	12	8	0	0	0	11	0	0	12	9	13	8	0	0	0	0	0	20	0	0	0	7	28
OTU1730	0	0	0	0	0	0	0	0	0	0	0	0	0	0	0	0	0	0	0	12	19	36	21	12	28	25	33	25	30	40	17	13	35	36	27	31	28	33	25	29	0	0	0	0	0	0	0	0	0
OTU1731	0	0	0	0	0	0	0	0	0	0	0	0	0	0	0	0	0	0	0	0	15	0	0	0	0	0	0	0	0	0	0	0	0	0	0	0	0	0	0	0	0	0	0	0	0	0	0	0	0
OTU1732	0	0	0	41	0	0	0	0	0	0	0	0	0	0	0	0	0	0	0	0	0	0	0	0	0	0	0	0	0	0	0	0	0	0	0	0	0	0	15	0	0	0	35	0	0	0	0	0	0
OTU1733	0	0	0	0	0	0	0	0	0	0	0	0	0	0	0	0	0	0	0	0	0	0	0	0	5	0	0	0	0	0	0	0	7	0	0	0	0	0	4	0	0	0	0	0	0	0	0	0	0
OTU1734	0	0	0	0	0	0	0	0	0	0	0	0	0	0	0	0	0	0	0	0	0	0	0	0	0	0	0	0	0	0	0	0	0	0	0	0	0	0	0	0	0	0	0	0	0	0	0	0	0
OTU1735	0	0	0	14	0	0	0	0	0	0	0	0	0	0	0	0	0	0	0	0	0	0	0	0	0	0	0	0	0	0	0	0	0	0	0	0	0	0	0	0	0	0	0	0	0	0	0	0	0
OTU1736	0	0	0	0	0	0	0	0	0	0	0	0	0	0	0	0	0	0	0	0	0	0	0	0	0	0	0	0	0	0	0	0	0	0	0	0	0	27	0	0	0	0	0	0	18	0	0	0	0
OTU1737	0	0	0	0	0	0	0	0	0	0	26	0	0	0	0	0	0	0	0	0	0	0	0	0	0	0	0	0	0	0	0	0	0	0	0	0	0	0	0	0	0	0	35	19	0	39	0	0	0
OTU1738	0	0	0	0	0	0	0	0	0	0	0	0	0	0	0	0	0	0	0	0	0	0	0	0	0	0	0	0	0	0	22	0	4	0	0	0	0	0	0	0	0	0	0	0	0	0	0	0	0
OTU1739	0	0	0	0	0	0	0	0	0	0	0	0	0	0	0	0	0	0	0	0	0	0	0	0	0	0	3	0	6	0	0	0	0	0	0	0	0	13	4	0	0	0	0	0	0	0	0	0	0
OTU1740	0	0	0	0	0	0	0	0	0	0	0	0	0	0	0	0	0	0	0	0	0	0	0	0	0	0	0	0	0	0	0	0	0	0	0	0	0	0	0	0	0	0	0	0	0	14	0	0	0
OTU1741	0	82	0	0	0	0	0	0	0	0	0	0	0	0	0	0	0	0	0	0	0	0	0	0	0	0	0	0	14	0	0	0	21	0	0	0	0	0	0	0	0	41	0	0	0	0	0	0	0
OTU1742	0	0	0	0	0	0	0	0	0	0	0	0	0	0	0	0	0	0	0	0	0	0	0	0	0	0	0	0	0	0	0	0	0	0	0	0	0	9	0	0	0	0	0	0	0	0	0	0	0
OTU1743	0	19	0	0	0	0	0	24	0	0	0	15	0	0	35	0	0	0	0	58	0	0	0	0	0	0	0	0	30	0	0	48	35	28	0	0	28	36	26	0	0	0	28	0	0	22	0	0	0
OTU1744	0	0	0	0	0	10	0	0	0	0	0	0	0	0	0	0	0	0	0	0	0	0	0	0	0	0	0	0	0	0	0	0	0	0	0	0	0	12	0	0	0	0	0	0	0	0	0	0	0
OTU1745	0	0	0	0	0	0	0	0	9	0	0	0	0	38	47	0	0	0	31	0	95	129	102	152	104	150	145	124	152	142	56	133	103	140	66	135	99	76	113	145	0	32	0	12	12	0	0	0	0
OTU1746	0	0	0	0	0	0	0	0	0	0	38	0	0	0	0	0	0	0	0	0	0	0	0	0	0	0	0	0	0	0	0	0	0	0	0	0	0	0	0	0	0	0	0	0	0	98	0	0	0
OTU1747	0	0	0	0	0	0	0	0	0	0	0	0	0	0	0	0	0	0	0	0	0	0	0	0	0	0	0	0	0	0	0	0	0	0	0	0	0	0	0	0	0	0	0	0	0	0	0	0	0
OTU1748	0	0	0	0	0	0	0	0	0	0	0	0	0	0	0	0	0	0	0	0	0	0	0	0	0	8	0	0	10	0	0	0	0	0	0	0	0	8	0	0	0	0	0	0	0	0	0	0	0
OTU1749	0	0	0	0	0	0	0	0	0	0	0	0	0	0	0	0	0	0	0	0	0	0	0	0	0	5	0	0	0	0	0	0	0	0	0	4	0	0	0	0	0	6	0	0	0	0	0	0	0
OTU1750	0	0	0	0	0	0	0	0	0	0	0	0	0	0	0	0	0	0	0	0	0	0	0	0	0	0	0	0	0	0	0	0	0	0	0	11	0	0	0	0	0	0	0	0	0	0	0	0	0
OTU1751	0	0	0	0	0	0	0	0	0	0	0	67	30	0	0	0	0	38	0	0	0	31	0	17	0	15	23	0	0	0	0	0	0	0	0	0	21	0	0	0	0	0	0	0	0	0	8	0	0
OTU1752	0	0	0	0	0	0	0	0	0	0	0	0	0	0	0	0	0	0	0	0	0	0	0	0	0	0	0	0	0	0	0	0	0	0	0	0	0	0	15	13	0	0	0	0	0	0	0	0	0
OTU1753	0	0	0	0	0	0	0	0	0	0	0	0	0	0	0	0	0	0	0	0	0	0	14	0	0	0	0	0	0	0	0	0	0	0	0	0	0	0	21	0	0	44	0	0	0	92	0	0	0
OTU1754	0	0	0	0	0	0	0	0	0	0	0	0	7	0	0	0	0	0	0	0	0	0	0	0	0	0	0	0	0	28	0	0	0	0	0	0	0	0	0	0	0	0	0	0	0	0	0	0	0
OTU1755	0	0	0	0	0	0	0	0	0	0	0	0	0	0	0	0	0	0	0	0	0	0	0	0	0	0	0	0	0	0	0	0	0	0	0	8	0	0	0	0	0	0	0	0	0	0	0	0	0
OTU1756	0	0	0	0	11	0	0	0	0	0	50	84	0	0	0	0	0	0	0	0	0	0	0	0	0	0	0	0	0	0	0	0	0	24	0	0	0	0	0	0	0	0	0	0	0	0	0	0	0
OTU1757	0	0	0	16	0	0	0	0	0	0	0	30	0	43	0	0	0	0	55	0	81	101	64	104	50	0	45	0	26	174	225	18	0	192	92	84	0	33	83	0	0	0	0	0	0	0	0	0	0
OTU1758	0	5	0	0	29	0	0	0	0	0	0	0	0	0	133	0	0	0	0	0	99	153	113	34	48	32	160	0	117	79	0	219	108	39	104	53	122	164	53	80	0	0	22	0	0	0	0	0	0
OTU1759	21	17	0	28	16	0	0	0	20	15	11	17	10	13	39	16	8	14	41	42	30	37	28	21	14	23	15	24	16	20	12	32	0	25	8	19	27	31	23	28	0	4	18	14	6	0	0	0	20
OTU1760	0	0	0	0	0	0	0	0	0	0	0	0	0	0	0	0	0	0	0	0	30	37	38	37	0	0	0	45	42	49	0	14	0	57	0	49	40	50	36	55	0	0	0	0	0	0	0	0	0
OTU1761	0	0	0	0	0	0	0	0	0	0	0	0	0	0	0	0	0	0	0	36	55	0	0	67	0	0	0	0	88	0	89	21	89	42	74	0	0	46	90	61	0	31	72	10	0	0	0	0	0
OTU1762	0	0	0	0	0	0	0	0	0	0	0	0	0	0	0	0	0	6	0	0	0	0	0	0	0	0	0	0	0	0	0	0	0	0	0	0	0	0	19	0	0	0	0	0	0	0	0	0	0
OTU1763	0	0	0	0	0	0	0	0	0	0	0	0	0	0	0	0	0	0	0	0	0	0	0	0	0	3	0	8	0	0	0	0	0	0	0	0	0	0	0	0	0	0	0	0	0	0	0	0	0
OTU1764	0	0	0	0	0	0	0	9	0	0	0	0	33	0	16	0	0	0	0	0	0	0	0	0	0	0	0	0	18	0	0	0	0	0	0	0	0	0	0	0	0	0	27	0	0	0	0	0	0
OTU1765	0	0	0	0	0	0	0	0	0	0	0	0	0	0	9	0	0	0	0	0	23	0	40	48	0	0	0	27	0	19	0	0	23	79	0	0	0	0	33	29	0	0	0	0	0	29	0	0	0
OTU1766	0	0	0	0	0	11	0	0	0	0	0	0	0	0	0	0	0	0	0	0	17	12	10	14	0	11	23	0	15	17	15	0	13	13	8	11	26	45	9	27	0	0	0	0	0	0	0	0	0
OTU1767	0	0	0	14	0	0	0	0	0	0	0	0	0	0	0	0	0	0	0	0	0	25	0	21	28	26	21	17	23	20	0	0	23	7	0	0	0	21	0	0	0	0	0	0	0	0	0	0	0
OTU1768	0	0	0	0	0	0	0	0	0	0	0	0	0	0	0	0	0	0	0	0	0	0	0	19	0	0	15	11	14	0	0	16	0	0	0	0	8	0	11	0	0	0	0	0	0	0	0	0	0
OTU1769	0	0	0	0	0	0	0	0	0	0	0	0	0	0	0	0	0	0	0	0	0	15	0	0	0	0	0	0	0	0	0	0	0	0	0	0	0	0	0	29	0	0	0	0	0	0	0	0	0
OTU1770	0	0	0	0	0	0	0	0	0	0	0	0	0	0	0	0	0	0	0	0	0	0	0	0	0	16	8	0	21	0	0	0	0	0	0	14	9	0	0	0	0	0	0	0	0	0	0	0	0
OTU1771	0	0	0	0	0	0	0	0	0	0	0	0	0	0	0	0	0	0	0	0	72	64	22	0	0	0	21	28	0	69	0	22	0	15	0	0	30	0	26	3	0	0	31	0	0	40	0	0	0
OTU1772	0	0	0	0	0	0	0	0	0	0	0	0	0	0	0	0	0	0	0	0	19	0	0	0	0	0	0	0	0	0	0	0	0	0	0	0	0	0	0	15	0	0	0	0	0	0	0	0	0
OTU1773	0	0	0	0	0	0	0	0	0	0	0	0	0	0	0	0	0	0	0	0	0	0	0	0	0	0	0	5	0	10	0	0	0	0	0	0	0	0	0	0	0	0	0	0	0	0	0	0	0
OTU1774	0	0	0	0	0	0	0	0	0	0	0	0	0	0	0	0	0	0	0	0	0	0	0	0	0	0	0	16	0	0	0	0	22	19	0	0	0	0	0	0	0	0	0	0	0	0	0	0	0
OTU1775	0	0	0	0	0	0	0	0	0	0	0	0	0	0	0	0	0	0	0	0	0	0	0	0	0	6	0	0	12	0	15	0	8	0	0	0	0	0	0	0	0	0	36	0	0	68	0	0	0
OTU1776	0	0	0	0	0	0	0	0	0	0	0	0	0	0	0	0	0	0	0	0	0	0	0	0	0	0	9	0	15	0	0	0	0	0	0	0	0	0	0	0	0	0	0	0	0	0	0	0	0
OTU1777	8	18	0	0	17	0	0	0	0	0	0	0	0	0	0	0	0	0	0	0	0	0	0	0	0	0	0	0	0	0	0	0	0	0	0	0	0	0	0	0	0	0	0	0	0	0	0	0	0
OTU1778	0	0	0	0	0	0	0	0	0	0	0	0	0	0	0	0	0	0	0	0	0	0	7	11	0	0	0	0	13	0	12	0	0	21	0	0	16	0	11	14	0	0	0	0	0	0	0	0	0
OTU1779	0	0	0	0	0	0	0	0	0	0	0	0	0	0	0	0	0	0	0	0	0	0	6	0	0	0	0	0	0	0	0	0	0	0	0	0	0	0	0	61	0	0	0	0	0	0	0	0	0
OTU1780	0	0	0	0	0	0	0	0	0	0	0	0	0	0	0	0	0	0	0	0	0	0	0	0	0	0	0	0	12	0	5	0	0	0	0	0	0	0	0	22	0	0	0	0	0	0	0	0	0
OTU1781	0	0	0	0	0	0	0	0	0	0	0	0	0	0	0	0	0	0	0	0	0	0	0	0	0	0	0	0	0	0	0	5	0	0	0	0	0	0	0	0	0	0	0	0	0	0	0	0	0
OTU1782	0	0	0	0	0	0	0	0	0	0	0	0	0	0	0	0	0	0	0	0	6	0	0	0	0	0	0	0	0	0	0	0	0	0	0	0	0	6	0	0	0	0	0	0	0	0	0	0	0
OTU1783	0	0	0	0	0	0	0	0	0	0	0	0	0	0	0	0	0	0	0	0	0	0	0	0	0	9	0	0	7	12	0	0	22	4	0	15	7	0	0	9	0	0	0	0	0	0	0	0	0
OTU1784	0	0	0	0	0	0	0	0	0	0	0	0	0	0	0	0	0	0	0	0	0	15	0	0	0	0	29	0	0	15	0	0	0	0	0	0	0	0	0	0	0	0	0	0	0	0	0	0	0
OTU1785	0	0	0	0	0	0	0	0	0	0	0	0	0	0	0	0	0	0	0	0	0	0	0	0	0	0	0	0	0	0	0	0	0	0	0	0	0	0	0	0	0	0	0	5	0	0	0	0	0
OTU1786	0	0	0	0	0	0	0	0	0	0	0	0	0	0	0	0	0	0	0	0	0	0	0	0	0	0	0	0	0	0	0	25	0	16	12	0	0	15	0	26	0	0	0	15	0	0	0	0	0
OTU1787	0	0	0	0	0	0	0	0	0	0	0	14	0	0	0	0	0	0	0	0	0	0	0	0	0	0	0	0	0	0	0	0	0	0	0	0	0	16	0	0	0	0	0	0	0	0	0	0	0
OTU1788	0	0	0	0	0	0	0	0	0	0	0	0	0	0	0	0	0	0	0	0	0	0	0	0	0	0	0	0	0	0	0	0	0	0	0	0	0	0	0	0	0	0	34	0	0	110	0	0	0
OTU1789	0	0	0	0	0	0	0	0	0	0	0	0	0	0	0	0	0	0	0	0	0	0	0	0	0	0	0	0	0	0	0	0	0	0	0	0	0	0	0	0	0	0	0	0	0	0	0	0	0
OTU1790	0	0	0	0	0	0	0	0	0	0	0	9	0	0	0	0	0	0	0	0	13	16	0	0	0	0	20	0	0	0	0	0	0	14	0	5	0	20	22	0	0	16	0	0	0	0	0	0	0
OTU1791	0	0	0	0	0	0	0	0	0	0	0	0	0	0	0	0	0	0	0	0	9	0	0	0	0	0	0	0	19	0	0	0	0	0	0	0	7	21	0	0	0	0	0	0	0	0	0	0	0
OTU1792	0	0	0	0	0	0	0	0	0	0	0	0	0	0	0	0	0	0	0	0	0	0	0	0	10	0	16	0	22	16	0	0	0	0	0	22	0	17	0	0	0	0	0	0	0	0	0	0	0
OTU1793	0	0	0	0	0	0	0	0	0	0	0	0	0	0	0	0	0	0	0	0	0	0	0	0	0	6	0	0	0	0	0	0	7	0	10	0	0	0	0	6	0	0	0	0	0	0	0	0	0
OTU1794	0	0	0	0	0	0	0	0	0	0	0	0	0	6	0	0	0	0	0	0	29	35	35	30	32	0	85	20	0	0	36	39	65	28	0	34	0	64	37	65	0	0	0	10	0	277	11	0	0
OTU1795	0	0	0	0	0	0	0	0	0	0	28	0	0	0	0	0	0	0	0	0	0	0	11	0	0	0	0	0	0	0	0	0	0	0	0	0	0	0	0	0	0	0	0	0	0	0	0	0	0
OTU1796	0	0	0	0	0	0	0	0	0	0	0	0	0	0	0	0	0	0	0	0	0	0	0	0	36	0	0	0	0	0	0	0	21	0	17	0	0	0	0	0	0	0	0	0	0	0	0	0	16
OTU1797	0	0	0	0	0	0	0	0	0	0	0	0	0	0	0	0	0	0	0	0	0	0	0	0	0	0	0	0	0	0	0	0	0	0	0	0	0	0	0	12	0	0	0	0	0	0	0	0	0
OTU1798	0	0	0	0	7	0	0	0	0	0	0	0	0	0	0	0	0	0	0	0	0	0	0	0	0	0	0	0	4	0	0	0	0	0	0	0	0	0	0	0	0	0	0	0	0	0	0	0	0
OTU1799	0	0	0	0	0	0	0	0	0	0	0	0	0	0	0	0	0	0	0	0	0	0	0	0	0	0	0	0	6	0	0	0	0	0	0	0	0	0	0	0	0	0	18	0	0	45	0	0	0
OTU1800	0	0	0	0	0	0	0	0	0	15	0	0	0	0	18	0	0	0	0	0	0	0	0	0	0	0	0	0	0	0	0	17	0	0	0	0	0	0	0	0	0	0	11	0	0	0	0	0	0
OTU1801	0	0	0	0	0	0	0	0	0	0	0	0	0	0	0	0	0	0	0	0	17	0	0	0	0	0	0	0	0	0	0	0	0	14	0	16	0	0	0	14	0	0	0	0	0	0	0	0	0
OTU1802	0	0	0	0	0	0	0	0	0	0	0	0	0	0	0	0	0	0	0	0	0	0	0	0	0	0	16	0	0	0	0	0	15	0	0	0	0	0	0	0	0	0	0	0	0	0	0	0	0
OTU1803	0	0	0	0	0	0	0	0	0	0	0	0	0	0	0	0	0	0	0	0	5	0	0	0	0	0	0	0	0	0	0	0	0	7	0	0	0	0	0	0	0	0	0	0	0	0	0	0	0
OTU1804	0	0	0	0	0	0	0	0	0	0	0	0	0	0	0	0	0	0	0	0	0	0	15	0	0	0	0	0	0	23	0	0	17	0	0	0	0	0	0	0	0	0	0	0	0	0	0	0	0
OTU1805	0	0	0	0	0	0	0	0	0	0	30	68	42	84	211	25	0	18	0	0	135	149	152	170	274	141	148	0	194	339	141	133	50	172	64	182	147	68	172	60	13	118	120	0	0	0	0	0	0
OTU1806	0	0	0	0	0	0	0	0	0	0	0	0	0	0	0	0	0	0	0	0	37	23	36	34	38	33	31	26	40	34	38	36	32	42	28	33	32	36	36	46	0	0	0	0	0	0	0	0	0
OTU1807	0	0	0	0	0	13	0	0	0	0	0	60	21	0	65	0	0	79	0	0	0	0	0	0	0	0	0	0	0	0	0	0	0	0	0	0	0	0	0	0	0	0	0	0	0	0	8	0	0
OTU1808	0	0	0	0	0	0	0	0	0	0	0	0	0	0	0	0	0	0	0	0	0	0	0	0	0	0	27	0	0	8	0	0	0	0	0	0	0	0	0	0	0	0	0	0	0	0	0	0	0
OTU1809	0	0	0	0	0	0	0	0	0	0	0	0	0	0	0	0	0	0	0	0	0	11	0	0	0	0	0	0	0	0	0	0	0	0	0	0	0	0	0	0	0	0	0	0	0	0	0	0	17
OTU1810	0	0	0	0	0	0	0	0	0	0	0	0	0	0	0	0	0	0	0	0	0	0	0	0	0	0	0	0	4	0	0	0	0	0	0	12	0	0	0	0	0	0	0	0	0	0	0	0	0
OTU1811	0	0	0	0	0	0	0	0	0	0	0	0	0	0	0	0	0	0	0	0	6	5	0	0	0	0	0	0	0	0	0	0	0	6	0	0	0	0	0	0	0	0	0	0	0	0	0	0	0
OTU1812	0	0	0	0	0	0	0	0	0	0	19	0	0	0	71	67	31	0	20	55	0	0	0	0	0	0	0	0	0	0	0	0	0	0	0	0	0	0	0	0	0	0	0	0	0	0	0	0	32
OTU1813	0	0	0	0	0	0	0	0	0	0	0	0	0	4	0	0	0	0	0	0	0	0	0	4	0	0	0	0	0	0	21	0	0	0	0	0	0	0	0	0	0	0	0	0	0	0	0	0	0
OTU1814	0	0	0	0	0	0	0	0	0	0	0	0	0	0	0	0	0	0	0	0	0	0	0	0	0	0	0	0	19	0	0	0	0	0	0	0	0	0	17	0	0	0	0	0	0	0	0	0	0
OTU1815	0	0	0	0	0	0	0	0	0	0	0	0	0	0	0	0	0	0	0	0	27	0	110	0	0	0	58	0	64	0	0	68	72	0	64	31	59	54	90	0	0	0	0	0	0	0	0	0	0
OTU1816	0	0	0	0	0	0	0	0	0	0	0	0	0	0	0	0	0	0	0	0	0	0	0	0	0	0	0	15	0	0	0	0	0	0	0	0	5	0	0	0	0	0	0	0	0	0	0	0	0
OTU1817	0	0	0	0	0	0	0	0	0	0	0	0	0	0	0	0	0	0	0	0	0	0	0	5	0	0	10	0	0	0	0	0	0	0	0	0	0	0	6	0	0	0	0	0	0	0	0	0	0
OTU1818	0	0	0	0	0	0	0	0	0	0	0	0	0	0	0	0	0	0	0	0	8	9	0	0	8	8	15	7	0	0	0	0	7	13	0	9	0	0	0	3	0	0	0	0	0	0	0	0	0
OTU1819	0	0	0	0	0	0	0	0	0	0	0	0	0	0	0	0	0	0	0	0	0	0	0	0	19	0	0	0	26	22	0	0	0	22	0	27	21	13	18	18	0	0	0	0	0	0	0	0	0
OTU1820	0	0	0	0	0	0	0	0	0	0	0	0	0	0	0	0	0	0	0	0	0	14	0	24	9	0	7	0	5	15	0	7	0	8	8	17	0	8	29	14	0	0	7	0	0	0	0	0	0
OTU1821	0	0	0	0	0	0	0	0	0	0	0	0	0	0	0	0	0	0	0	0	0	0	0	0	0	0	0	0	0	0	15	0	0	0	0	0	0	0	0	0	0	0	0	0	0	17	0	0	0
OTU1822	0	0	0	0	0	0	0	0	0	0	0	0	0	0	0	0	0	0	0	0	0	7	0	8	0	12	11	11	6	0	0	19	16	9	14	18	10	8	26	18	0	0	0	0	0	0	0	0	0
OTU1823	0	0	0	0	0	0	0	0	0	0	0	0	0	0	0	0	0	0	0	0	0	0	0	0	0	0	0	0	15	0	0	0	12	0	0	14	0	0	18	23	0	0	0	0	0	0	0	0	0
OTU1824	0	22	0	0	0	0	0	0	0	0	0	0	0	0	0	0	0	0	0	0	0	0	0	0	0	0	0	0	0	0	0	0	0	0	0	0	0	0	29	0	0	0	0	0	0	0	0	0	0
OTU1825	0	0	0	0	0	0	0	0	0	0	0	0	0	0	0	0	0	0	0	0	0	11	0	0	0	0	0	0	0	0	0	0	0	0	0	0	0	0	0	0	0	0	0	0	0	0	0	0	0
OTU1826	0	0	0	0	0	0	0	0	0	0	0	0	0	0	0	0	0	0	0	0	0	0	0	0	0	5	0	0	0	0	0	0	8	0	4	32	0	0	0	0	0	0	0	0	0	0	0	0	0
OTU1827	0	0	0	0	0	0	0	0	0	0	0	0	0	0	0	0	0	0	0	0	0	0	0	0	0	0	0	7	7	0	0	0	11	8	10	0	0	0	6	9	0	0	0	0	0	0	0	0	0
OTU1828	0	0	0	0	0	0	0	0	0	0	0	0	0	0	0	0	0	0	0	0	21	0	40	22	0	0	0	0	0	35	0	0	0	0	0	0	0	0	0	40	0	0	0	0	0	0	0	0	0
OTU1829	7	0	0	0	0	0	0	0	0	0	0	0	0	0	0	0	0	0	0	0	0	7	0	0	0	0	0	0	0	9	0	0	5	0	0	0	0	0	0	0	0	0	0	0	0	0	0	0	0
OTU1830	0	33	0	0	0	0	0	0	0	0	0	0	0	0	0	0	0	0	0	0	0	0	0	0	0	0	0	0	0	0	0	0	0	0	0	0	0	0	0	0	0	0	0	0	0	0	0	0	0
OTU1831	0	0	0	0	0	0	0	0	0	0	0	0	0	0	0	0	0	0	0	0	0	0	0	0	0	0	0	0	0	0	0	0	0	0	0	27	0	0	0	33	0	0	0	0	0	0	0	0	0
OTU1832	0	0	0	0	0	0	0	0	0	0	0	0	0	0	0	0	0	0	0	0	0	0	0	0	13	0	0	0	0	0	0	0	0	0	0	0	0	0	8	0	0	0	0	0	0	0	0	0	0
OTU1833	0	0	0	0	0	0	0	0	0	0	0	0	0	0	0	0	0	0	0	0	0	0	0	0	0	0	0	0	0	0	12	0	0	0	0	0	0	0	0	0	0	0	0	0	0	0	0	0	0
OTU1834	0	0	0	0	0	0	0	0	0	0	0	0	0	0	0	0	0	0	0	0	9	0	0	0	0	0	0	0	0	0	0	0	0	0	0	17	0	0	0	0	0	0	0	0	0	0	0	0	0
OTU1835	0	0	0	0	0	0	0	0	0	0	0	0	0	0	0	0	0	0	0	0	24	0	0	0	0	0	0	17	25	0	0	0	16	0	0	0	11	0	0	20	0	0	0	0	0	0	0	0	0
OTU1836	0	0	0	0	0	0	0	0	0	0	0	0	0	0	0	0	0	0	0	0	0	0	0	0	0	0	0	0	0	0	0	0	0	0	0	3	0	0	0	8	0	0	0	0	0	0	0	0	0
OTU1837	0	0	0	0	0	0	0	0	0	0	0	0	0	0	0	0	0	0	0	0	0	0	8	0	14	0	9	11	0	18	0	0	0	0	0	0	6	0	0	10	0	0	0	0	0	0	0	0	0
OTU1838	0	0	0	0	0	0	0	0	0	0	0	0	0	0	0	0	0	0	20	0	0	0	0	0	0	0	0	0	0	0	0	0	0	0	0	0	0	0	0	0	0	0	0	17	0	0	0	0	0
OTU1839	0	0	0	0	28	0	0	0	0	0	0	0	0	0	0	0	0	0	14	11	57	103	54	72	57	53	95	44	78	46	36	90	56	80	31	61	48	61	44	90	0	0	0	0	0	0	0	0	0
OTU1840	0	0	0	0	0	0	0	0	0	0	0	0	0	0	0	0	0	0	0	0	63	0	0	0	0	0	0	0	0	0	0	0	0	29	0	0	0	0	0	66	0	0	0	0	0	0	0	0	0
OTU1841	0	0	0	0	0	0	0	0	0	0	0	0	0	0	0	0	0	0	0	0	0	0	0	0	0	0	0	0	0	0	0	0	0	0	0	0	0	0	0	0	0	0	47	0	0	0	0	0	0
OTU1842	0	20	0	0	0	24	0	0	0	0	0	0	32	22	66	0	0	42	66	54	49	60	49	56	0	30	51	48	30	38	25	97	52	0	21	36	47	58	37	0	0	0	0	12	15	0	0	17	22
OTU1843	0	0	0	0	0	0	0	0	0	0	53	0	0	0	0	0	0	0	0	0	0	13	0	0	0	0	0	0	0	0	0	0	0	0	0	0	0	0	0	0	0	0	0	0	0	0	0	0	41
OTU1844	0	0	0	0	0	0	0	0	0	0	0	0	0	0	0	0	0	0	0	0	0	0	0	0	0	0	0	0	0	0	0	0	0	7	0	0	0	0	0	0	0	0	0	0	0	0	0	0	0
OTU1845	0	0	0	0	0	0	0	0	0	0	0	0	0	0	0	0	0	0	0	0	49	46	69	96	0	0	43	0	49	132	0	33	54	104	22	0	0	33	0	51	0	0	54	0	0	0	0	0	0
OTU1846	0	0	0	0	0	0	0	0	0	0	0	0	0	0	0	0	0	0	0	0	0	0	0	0	0	4	0	0	0	0	0	0	0	0	0	0	0	0	0	0	0	0	0	0	0	0	0	0	0
OTU1847	0	0	0	0	0	0	0	0	0	0	0	0	0	0	0	0	0	0	0	0	0	0	5	4	0	6	6	0	7	0	0	0	0	0	0	0	0	0	0	0	0	0	0	0	0	0	0	0	0
OTU1848	0	0	0	0	0	0	0	0	0	0	0	0	0	0	0	0	0	0	0	0	0	0	0	0	0	0	0	0	0	0	0	0	0	0	0	0	0	0	0	0	0	0	0	0	0	0	0	0	0
OTU1849	0	0	0	0	0	0	0	0	0	0	0	0	0	0	0	0	0	0	0	0	19	31	12	13	35	12	18	11	18	31	0	30	21	0	17	15	13	12	13	32	0	0	0	0	0	0	0	0	0
OTU1850	0	0	0	0	4	0	0	0	0	0	0	0	0	0	0	0	12	0	0	0	0	0	0	0	0	0	0	0	0	0	0	0	0	0	0	0	0	0	0	0	0	0	59	17	22	87	0	0	0
OTU1851	0	0	0	0	0	0	0	0	0	0	0	0	0	19	0	0	0	0	0	0	0	0	20	0	17	24	0	0	0	0	18	0	29	0	0	27	0	0	0	26	0	0	0	0	0	0	0	0	0
OTU1852	0	0	0	0	0	0	0	0	0	0	0	0	0	0	0	0	0	0	0	0	31	14	0	16	0	0	0	0	5	0	0	0	0	0	0	0	0	0	0	0	0	0	0	0	0	0	0	0	0
OTU1853	0	0	0	0	0	0	0	0	0	0	0	0	0	0	0	0	0	0	0	0	0	0	0	0	0	0	0	0	0	0	0	0	0	0	0	0	0	0	0	12	0	0	17	0	0	25	0	0	0
OTU1854	0	0	0	0	0	0	0	0	0	0	0	0	0	0	0	0	0	0	0	0	16	0	0	0	0	0	0	0	0	0	0	0	0	0	0	0	0	32	0	0	0	0	0	0	0	0	0	0	20
OTU1855	0	0	0	0	0	0	0	0	0	0	0	0	0	0	0	0	0	0	0	0	0	0	16	0	0	0	0	0	0	0	0	0	15	0	0	0	0	0	0	15	0	0	0	0	0	0	0	0	0
OTU1856	0	0	0	0	0	0	0	0	0	0	0	0	0	0	0	0	0	0	0	0	0	0	0	0	0	0	0	17	0	0	0	0	23	0	0	21	15	0	20	0	0	0	0	0	0	0	0	0	0
OTU1857	0	0	0	0	0	0	0	0	0	0	0	0	0	0	0	0	0	0	0	0	7	23	277	10	44	0	0	0	86	67	23	0	0	12	4	108	0	0	0	0	0	15	265	0	0	0	0	0	0
OTU1858	0	0	0	0	0	0	0	0	0	0	0	0	0	0	0	0	0	0	0	0	0	15	17	0	0	24	0	0	0	0	0	23	21	0	0	0	0	19	0	22	0	0	0	0	0	0	0	0	0
OTU1859	0	0	0	0	0	0	0	0	0	0	0	0	0	0	0	0	0	0	0	0	0	18	0	0	0	0	0	0	8	0	0	0	0	0	0	0	6	0	0	0	0	0	0	0	0	0	0	0	0
OTU1860	0	0	0	7	16	0	0	0	0	0	0	0	0	0	0	0	0	0	0	0	30	28	0	51	17	0	0	0	0	25	40	28	13	56	10	0	30	0	98	21	0	0	0	0	0	0	0	0	20
OTU1861	0	0	0	0	0	0	0	0	0	0	0	0	0	0	0	0	0	0	0	0	0	0	0	0	0	0	0	0	9	6	0	0	0	0	0	0	0	0	0	0	0	0	0	0	0	0	0	0	0
OTU1862	111	0	0	0	0	0	0	0	0	11	0	0	15	0	0	0	0	0	0	10	116	256	173	115	129	128	228	115	164	219	37	42	56	131	80	47	102	163	131	107	0	0	0	0	0	0	0	0	22
OTU1863	0	0	0	0	0	0	0	0	0	0	0	0	0	0	0	0	0	0	0	0	0	0	0	0	0	0	0	0	0	0	0	0	0	0	0	0	0	26	29	0	0	0	0	0	0	0	0	0	0
OTU1864	0	0	0	0	21	0	0	0	0	0	86	0	8	8	0	0	0	0	0	0	0	0	0	37	43	39	0	0	33	29	29	37	0	48	27	0	0	31	41	0	0	0	7	0	0	64	0	0	0
OTU1865	0	0	0	0	0	0	0	0	0	0	0	0	0	0	0	0	0	0	0	0	0	0	15	0	0	7	12	0	0	0	0	0	0	16	0	0	0	16	0	17	0	0	0	0	0	0	0	0	0
OTU1866	0	0	0	0	0	0	0	0	0	0	0	0	0	0	0	0	0	0	0	0	0	0	0	0	0	0	0	14	0	8	0	0	0	0	0	12	0	0	0	0	0	0	0	0	0	0	0	0	0
OTU1867	0	0	0	0	0	0	0	0	0	0	0	0	0	0	0	0	0	0	0	0	0	0	0	0	0	0	0	0	0	0	0	0	0	0	0	0	0	0	0	0	0	0	11	0	0	13	0	0	0
OTU1868	0	0	0	0	0	0	0	0	0	0	13	0	0	0	0	0	0	0	0	63	38	22	0	34	48	22	0	0	25	0	0	23	37	0	0	49	31	50	37	32	0	0	0	0	0	0	0	0	0
OTU1869	0	0	0	0	0	0	0	0	0	0	0	0	0	0	0	0	0	0	0	0	0	0	0	0	0	0	0	0	0	0	0	0	0	0	0	0	0	0	0	0	0	0	31	0	0	108	0	0	0
OTU1870	0	0	0	0	0	0	0	0	0	0	0	0	0	0	0	0	0	0	0	0	0	24	0	16	0	0	0	0	0	25	0	26	32	0	19	21	40	30	22	45	0	0	0	0	0	0	0	0	0
OTU1871	0	0	0	0	0	0	0	0	0	0	0	0	0	0	0	0	0	0	0	0	0	0	0	26	33	21	0	0	0	0	0	42	23	0	0	0	0	42	0	0	0	0	0	0	0	0	0	0	0
OTU1872	0	0	0	0	0	0	0	0	0	0	0	0	0	0	0	0	0	0	0	0	10	0	0	0	0	0	0	0	0	6	0	0	0	0	0	0	0	0	4	0	0	0	0	0	0	29	0	0	0
OTU1873	0	0	0	0	0	0	0	0	0	0	0	0	0	0	0	0	0	0	0	0	8	0	0	0	0	0	0	0	0	0	18	0	0	0	0	0	0	0	14	0	0	0	0	0	0	0	0	0	0
OTU1874	0	0	0	0	0	0	0	0	0	0	0	0	0	0	0	0	0	0	0	0	0	0	0	0	0	0	0	0	0	0	0	0	0	0	0	0	0	0	0	0	34	0	0	0	27	41	0	0	0
OTU1875	0	0	0	0	0	0	0	0	0	0	0	0	0	0	0	0	0	0	0	0	0	17	15	15	26	0	18	26	16	19	13	0	0	23	9	22	20	30	11	46	0	0	0	0	0	0	0	0	0
OTU1876	0	0	0	0	0	0	0	0	0	0	0	17	0	0	0	0	0	0	0	0	20	0	24	0	0	0	0	0	0	16	0	0	56	0	0	0	22	0	0	0	0	0	0	0	0	28	0	0	0
OTU1877	0	0	0	0	0	0	0	0	0	0	0	0	0	0	0	0	0	0	0	0	0	0	0	0	0	0	0	0	4	0	0	0	0	0	4	0	0	0	0	0	0	0	0	0	0	0	0	0	0
OTU1878	0	0	0	0	0	0	0	0	0	0	0	0	0	0	0	0	0	0	0	0	15	0	0	0	0	22	22	0	0	21	0	0	14	0	0	0	21	0	13	18	0	0	0	0	0	0	0	0	0
OTU1879	0	0	0	0	31	0	0	0	0	0	0	0	0	0	0	9	0	0	0	0	0	0	0	0	0	0	0	0	0	0	0	11	0	0	0	0	0	0	0	0	0	0	0	0	11	0	0	0	0
OTU1880	0	0	0	0	0	0	0	0	0	0	0	0	0	0	0	0	0	0	0	0	0	21	15	21	19	23	0	18	22	15	0	0	0	0	12	15	0	0	20	19	0	0	0	0	0	0	0	0	0
OTU1881	0	0	0	0	0	0	0	0	0	0	0	0	0	0	0	0	0	0	0	0	0	0	0	0	0	0	0	0	0	0	0	0	0	0	0	0	0	0	0	0	0	0	0	0	13	0	0	0	32
OTU1882	0	0	0	0	0	0	0	0	0	0	27	0	0	0	0	0	0	0	0	0	0	0	0	0	0	0	0	0	0	0	29	0	0	0	0	0	0	0	0	0	0	0	0	0	0	0	0	0	43
OTU1883	0	0	0	0	0	0	0	0	0	0	0	0	0	0	0	0	0	0	0	0	18	0	0	18	26	24	37	25	30	0	0	0	26	15	26	30	19	29	21	52	0	0	0	0	0	0	0	0	0
OTU1884	0	0	0	0	0	0	0	0	0	0	0	0	0	0	0	0	0	0	0	0	0	0	0	0	0	0	0	0	0	0	0	0	0	0	0	7	0	5	0	0	0	0	0	0	0	0	0	0	0
OTU1885	0	0	0	0	0	0	0	0	0	0	0	0	0	0	0	0	0	0	0	0	42	0	0	0	0	0	0	66	0	28	0	0	0	0	0	0	0	10	0	0	0	0	0	0	0	0	0	0	32
OTU1886	0	0	0	0	0	0	0	0	0	0	0	0	0	0	0	0	0	0	0	0	35	49	29	21	0	43	67	54	37	57	38	0	96	52	34	59	56	58	48	58	12	0	0	0	9	0	0	0	0
OTU1887	0	0	0	0	0	0	0	0	0	0	0	0	0	0	28	0	0	0	59	15	7	6	0	0	0	0	0	0	0	14	0	0	7	0	10	0	5	8	0	0	0	0	0	0	0	0	0	14	0
OTU1888	0	0	0	0	0	0	0	0	0	0	0	0	0	0	0	0	0	0	0	0	0	0	0	0	21	0	0	0	0	27	0	0	0	0	0	0	0	0	0	0	0	0	0	0	0	0	0	0	0
OTU1889	0	0	0	0	0	0	0	0	0	0	0	0	0	0	0	0	0	0	0	0	0	0	0	0	0	0	5	0	0	0	0	0	14	12	0	16	9	24	18	27	0	0	0	0	0	0	0	0	0
OTU1890	0	0	0	0	0	0	0	0	0	0	0	15	0	0	0	0	0	0	0	0	0	0	0	0	0	0	0	0	0	0	0	6	0	0	0	0	0	0	0	0	0	0	10	0	0	0	0	0	0
OTU1891	0	0	0	0	0	0	0	13	0	16	0	0	0	0	0	0	0	0	0	0	0	0	0	0	0	0	0	0	0	0	0	0	0	0	0	0	0	0	0	0	0	0	0	0	0	0	0	0	0
OTU1892	0	0	0	0	0	0	0	0	0	0	0	0	0	0	0	0	0	0	0	0	0	0	0	0	0	0	0	0	0	0	0	0	0	0	0	0	0	0	0	0	0	0	0	0	0	58	0	0	0
OTU1893	0	0	0	0	0	0	0	0	0	0	0	0	0	0	0	0	0	0	0	0	0	13	0	11	0	0	0	0	0	0	0	0	0	0	10	11	0	15	12	0	0	0	0	0	0	0	0	0	0
OTU1894	0	0	0	0	0	0	0	0	0	0	0	0	0	0	0	0	0	0	0	0	0	0	0	0	0	0	4	0	0	0	0	0	0	0	0	0	0	0	0	0	0	0	0	0	0	0	0	0	0
OTU1895	0	0	0	0	0	0	0	0	0	0	0	0	0	0	0	0	0	0	0	0	50	0	0	0	0	0	0	0	0	0	0	0	0	0	0	0	61	73	0	58	0	0	0	0	0	0	0	0	0
OTU1896	0	0	0	0	0	0	0	0	0	15	0	0	0	0	0	0	0	0	0	0	0	26	0	0	0	0	25	0	0	37	22	0	0	26	0	22	0	0	0	32	0	0	15	0	0	0	0	0	0
OTU1897	0	0	0	0	0	0	0	0	0	0	0	0	0	34	0	0	0	0	20	0	17	0	0	0	17	14	0	0	0	22	32	0	0	16	0	11	0	0	13	0	0	7	0	0	0	0	0	0	0
OTU1898	0	0	0	0	0	0	0	0	0	0	0	0	0	0	0	0	0	0	0	0	0	0	0	0	0	0	0	0	0	0	0	0	0	0	0	0	0	0	0	0	0	0	17	0	0	67	0	0	0
OTU1899	0	0	0	13	24	0	0	0	0	0	0	0	0	0	0	0	0	0	0	0	0	0	0	0	0	0	0	0	0	0	0	0	0	0	0	0	0	0	0	0	0	0	0	0	15	0	0	0	0
OTU1900	0	0	0	0	0	0	0	0	0	0	0	0	0	0	0	0	0	0	0	0	0	0	0	4	0	0	0	0	0	0	10	0	0	0	0	0	0	0	0	0	0	0	0	0	0	0	0	0	0
OTU1901	0	0	0	0	0	0	0	0	0	0	0	0	0	0	0	0	0	0	0	0	0	7	0	0	0	8	7	0	0	5	0	0	10	8	0	0	0	0	11	19	0	0	0	0	0	0	0	0	0
OTU1902	0	0	0	0	7	0	0	0	0	0	0	0	0	0	0	0	0	0	0	0	0	38	31	0	41	0	38	0	56	43	0	28	0	0	0	45	59	0	0	52	0	0	0	0	0	0	0	0	0
OTU1903	0	0	0	0	0	0	0	0	0	0	0	0	0	0	0	0	0	0	0	0	0	0	0	0	0	0	0	0	0	0	0	0	0	0	0	0	0	14	0	11	0	0	0	0	0	0	0	0	0
OTU1904	0	0	0	0	0	0	0	0	0	0	8	0	0	0	0	27	0	0	0	0	0	0	0	0	0	0	0	0	5	10	24	0	0	0	0	0	0	0	3	0	51	9	28	0	0	110	0	0	41
OTU1905	0	0	0	0	0	0	0	0	0	11	0	91	0	15	0	0	0	0	0	15	34	33	28	50	44	45	43	44	60	37	32	27	28	28	29	40	51	33	38	50	0	0	0	0	0	0	0	0	0
OTU1906	0	0	0	0	0	0	0	0	0	0	0	0	0	0	0	0	0	0	0	0	0	0	0	0	0	0	0	0	0	3	36	0	0	0	0	0	0	0	0	0	45	0	40	0	37	79	0	0	0
OTU1907	0	0	0	0	0	0	0	0	0	0	0	0	0	0	0	0	0	0	0	0	0	0	0	0	0	12	0	0	0	0	0	0	0	6	0	0	0	11	0	0	0	0	0	0	0	0	0	0	0
OTU1908	0	0	0	0	0	0	0	0	0	0	0	0	0	0	0	0	0	0	0	0	0	0	0	0	11	0	0	0	0	10	0	0	0	0	5	0	0	12	0	0	0	5	0	0	0	0	0	0	0
OTU1909	0	0	0	0	0	0	0	0	0	0	0	0	0	0	0	0	0	0	0	0	0	17	0	0	0	13	0	27	16	0	0	15	35	11	18	0	0	39	29	0	0	0	0	0	0	0	0	0	0
OTU1910	0	50	0	0	29	0	0	0	0	0	14	17	0	0	0	0	0	0	0	0	0	0	0	22	0	0	19	23	0	0	23	0	0	36	0	0	19	13	34	0	0	0	0	0	0	0	0	0	32
OTU1911	0	0	20	0	0	0	0	39	0	0	61	0	0	0	0	0	0	0	0	0	0	0	0	0	0	0	0	0	0	0	0	0	0	0	0	0	0	0	0	0	0	63	0	12	0	0	0	0	45
OTU1912	0	0	0	0	0	0	0	0	0	0	0	0	0	0	0	0	0	0	0	0	0	0	0	0	0	0	0	0	0	0	0	0	0	0	0	0	0	0	10	0	0	0	0	0	0	0	0	0	0
OTU1913	0	0	0	0	0	0	0	0	0	0	0	0	0	0	0	0	0	0	0	0	0	36	0	9	0	7	0	0	26	32	0	0	0	15	57	35	26	0	47	39	0	0	0	0	0	0	0	0	0
OTU1914	0	0	0	0	0	0	0	0	0	0	0	0	0	0	0	0	0	0	0	0	0	0	0	0	0	4	0	0	0	0	0	0	0	0	0	0	7	0	2	0	0	0	0	0	0	0	0	0	0
OTU1915	0	0	0	0	0	0	0	0	0	0	0	0	0	0	0	0	0	0	0	0	0	18	0	0	0	0	0	0	18	0	0	0	0	0	0	0	0	14	0	0	0	0	0	0	0	0	0	0	0
OTU1916	0	0	0	11	0	10	0	0	0	0	0	25	0	0	29	0	0	0	0	0	15	34	12	0	0	22	24	26	0	0	0	0	21	14	29	0	16	17	0	0	0	0	36	0	0	0	0	0	0
OTU1917	0	0	0	0	0	0	0	0	0	0	0	0	0	0	0	0	0	0	0	0	49	27	0	0	28	0	37	31	51	26	0	26	27	40	29	0	42	33	56	61	0	0	0	0	0	0	0	0	0
OTU1918	0	0	0	0	6	0	0	10	0	0	0	47	0	0	0	0	0	0	0	0	0	0	0	14	0	0	0	0	0	0	0	0	0	0	0	0	0	0	0	0	0	0	12	0	0	0	0	0	0
OTU1919	0	0	0	0	0	0	0	0	0	0	0	0	0	0	0	0	0	0	0	0	0	0	0	0	0	0	0	0	0	0	0	0	0	0	0	36	32	0	0	0	0	0	0	0	0	0	0	0	0
OTU1920	0	0	0	0	0	0	0	0	0	0	0	0	0	0	0	0	0	0	0	0	0	3	0	13	11	0	0	0	0	27	9	0	0	0	0	0	0	0	0	0	0	0	0	0	0	0	0	0	0
OTU1921	0	0	0	0	0	0	0	0	0	0	0	0	0	0	0	0	0	0	0	0	16	0	0	0	11	0	0	0	0	0	0	0	0	0	0	0	14	0	0	0	0	0	0	0	0	0	0	0	0
OTU1922	0	0	0	0	0	0	0	0	0	0	0	0	0	0	0	0	0	0	0	0	11	0	9	0	0	0	12	0	0	0	0	0	0	0	7	0	0	7	0	0	0	0	0	0	0	0	0	0	0
OTU1923	0	21	0	0	9	0	0	6	0	0	0	0	0	0	0	0	0	0	0	0	0	0	0	0	0	0	0	0	0	0	0	0	0	0	0	0	3	0	2	0	0	0	0	4	0	0	0	0	0
OTU1924	0	0	0	0	0	0	0	0	0	0	0	0	0	0	0	0	0	0	0	0	0	0	0	0	0	0	0	0	0	0	0	0	0	9	0	0	0	0	18	19	0	0	0	0	0	0	0	0	0
OTU1925	0	0	0	0	0	0	0	0	0	0	0	0	0	0	0	0	0	0	0	0	0	0	0	0	0	0	0	0	0	9	0	0	4	0	0	0	3	0	0	0	0	0	0	0	0	0	0	0	0
OTU1926	0	0	0	0	0	0	0	0	0	0	0	0	0	0	0	0	0	0	0	0	7	10	0	0	0	0	0	0	9	0	0	0	0	0	0	0	0	0	0	0	0	0	0	0	0	0	0	0	0
OTU1927	0	0	0	0	0	0	0	0	0	0	0	0	0	0	0	0	0	0	0	0	0	23	0	0	0	0	40	0	0	39	0	0	0	0	0	0	0	0	0	30	0	0	0	0	0	0	0	0	0
OTU1928	0	0	0	26	0	0	0	0	0	0	0	0	0	0	0	0	0	0	0	0	0	0	0	0	0	0	0	24	0	0	0	0	0	0	0	0	0	0	0	0	0	0	0	0	0	0	0	0	0
OTU1929	0	0	0	0	0	0	0	0	0	0	0	0	0	0	0	0	0	0	0	0	0	0	0	0	0	0	0	0	0	0	0	0	0	0	0	0	0	0	0	0	0	0	0	0	0	0	0	0	0
OTU1930	0	0	0	0	0	0	0	0	0	0	0	37	0	0	0	0	0	0	0	0	0	0	0	0	0	0	0	0	0	0	4	0	0	12	0	14	0	0	0	0	0	0	0	0	0	0	0	0	0
OTU1931	0	0	0	0	0	0	0	0	0	0	0	0	0	0	0	0	0	0	0	0	0	0	5	0	0	0	0	7	0	0	0	0	0	0	0	21	0	0	0	0	0	0	0	0	0	0	0	0	0
OTU1932	0	0	0	0	0	23	0	0	0	0	0	0	0	0	0	0	0	0	0	0	0	0	0	16	0	0	0	0	0	0	0	0	0	0	0	0	0	0	0	0	0	0	0	0	0	0	0	17	0
OTU1933	0	0	0	0	0	0	0	0	0	0	0	0	0	0	0	0	0	0	0	0	40	0	0	0	0	0	0	0	0	0	0	0	0	0	0	0	0	0	0	44	0	0	0	0	0	0	0	0	0
OTU1934	0	0	0	0	0	0	0	0	0	0	0	0	0	0	0	0	0	0	0	0	0	0	0	0	0	7	0	0	9	0	12	0	0	0	0	6	0	15	0	7	0	0	0	0	0	0	0	0	0
OTU1935	0	0	0	0	0	0	0	0	0	0	0	0	0	0	0	0	0	0	0	0	3	0	0	0	0	0	0	0	0	0	0	0	0	0	0	0	0	0	0	0	0	0	0	0	0	0	0	0	0
OTU1936	0	0	0	0	0	0	0	0	0	0	0	0	0	0	0	0	0	0	0	0	0	0	0	0	0	0	0	0	0	0	0	0	0	0	0	0	0	0	0	0	21	0	0	0	0	45	0	0	0
OTU1937	0	0	0	0	0	0	0	0	0	0	0	0	0	0	0	0	0	0	0	0	0	8	0	6	10	7	17	7	13	8	11	6	20	0	20	8	2	0	10	9	0	0	0	0	0	0	0	0	0
OTU1938	0	0	0	0	0	0	0	0	0	0	0	0	0	0	0	0	0	0	0	0	0	0	0	0	0	8	0	0	0	0	0	0	0	0	0	0	0	0	0	0	0	0	0	0	0	0	0	0	0
OTU1939	0	0	0	0	0	0	0	0	0	14	0	0	0	0	0	0	0	0	0	21	85	54	27	0	0	35	33	44	27	205	72	0	29	19	26	44	30	20	48	49	7	0	0	0	0	0	0	0	0
OTU1940	0	0	0	0	0	0	0	0	0	0	0	0	0	0	0	0	0	0	0	60	10	0	0	0	0	0	0	0	0	0	0	50	0	0	0	0	0	0	0	0	0	0	0	18	0	0	0	0	0
OTU1941	0	0	0	0	0	0	0	0	0	0	0	0	0	0	0	0	0	0	0	0	0	25	17	0	21	20	0	27	18	0	0	0	0	0	0	23	27	32	0	25	0	0	0	0	0	0	0	0	0
OTU1942	52	0	0	0	0	0	0	0	0	0	60	0	0	0	0	0	0	0	0	0	16	0	0	0	0	0	0	0	0	0	0	45	0	0	0	0	0	0	29	0	0	0	0	0	0	0	0	0	0
OTU1943	0	0	0	0	0	0	0	0	0	0	0	0	0	0	0	0	0	0	0	0	0	0	0	0	0	0	0	0	0	0	0	0	0	0	0	20	0	0	0	0	0	0	0	0	0	0	9	0	0
OTU1944	0	0	0	0	0	0	0	0	0	0	0	0	0	0	0	0	0	0	0	0	0	0	0	2	0	0	0	0	0	0	0	0	0	0	0	0	13	0	0	0	0	0	0	0	0	0	0	0	0
OTU1945	0	0	0	0	0	0	0	0	0	0	0	0	0	0	0	0	0	0	0	0	0	10	0	0	0	8	0	0	10	0	0	0	0	0	0	9	0	0	0	0	0	0	0	7	0	0	0	0	0
OTU1946	0	0	0	0	0	0	0	0	0	0	0	0	0	0	0	0	0	0	0	0	0	0	9	0	0	16	0	0	12	14	0	0	0	11	0	15	0	16	0	0	0	0	7	0	0	0	0	0	0
OTU1947	0	0	0	0	0	0	0	0	0	0	0	0	0	0	0	0	0	0	0	0	0	11	0	8	15	21	0	7	13	14	0	0	14	0	0	0	0	11	21	14	0	0	0	0	0	0	0	0	0
OTU1948	0	0	0	0	0	0	0	0	0	0	0	0	0	0	0	0	0	0	0	0	0	25	0	0	0	0	0	0	0	0	0	0	0	0	0	0	0	0	0	0	0	0	0	0	0	0	0	0	0
OTU1949	0	0	0	0	0	0	0	0	0	0	0	0	0	37	0	0	0	0	0	0	20	8	14	0	6	15	21	0	13	30	0	35	0	17	9	15	11	41	5	0	0	0	0	0	0	15	0	0	45
OTU1950	0	0	0	0	0	0	0	0	0	0	0	0	0	0	0	0	0	0	0	0	0	0	9	0	0	0	0	0	0	0	0	0	17	0	0	21	0	0	0	0	0	0	0	0	0	0	0	0	0
OTU1951	0	0	0	0	0	0	0	0	0	0	0	0	0	14	0	0	0	0	0	0	0	36	111	8	15	38	8	0	54	76	66	126	0	109	0	0	50	53	52	30	0	0	0	0	0	0	0	0	0
OTU1952	0	0	0	0	15	0	0	0	0	0	0	0	0	0	0	0	0	0	0	0	18	35	22	28	25	0	29	34	29	27	0	16	35	32	26	27	29	29	43	62	0	0	0	0	0	0	0	0	0
OTU1953	0	0	0	0	0	0	0	0	0	0	0	0	0	0	0	0	0	0	26	0	0	0	0	0	0	25	0	0	0	0	0	0	0	0	0	0	0	0	0	0	17	0	0	0	0	0	0	0	0
OTU1954	0	0	0	0	0	0	0	0	0	0	0	0	0	0	0	0	0	0	0	0	0	0	0	0	0	0	0	0	0	3	0	0	0	0	0	0	0	0	0	33	0	0	0	0	0	0	0	0	0
OTU1955	0	18	0	0	0	0	0	0	0	0	0	0	0	0	0	0	0	0	0	0	0	0	0	0	0	0	0	0	0	9	0	15	0	9	0	0	7	0	0	0	0	0	0	0	0	0	0	19	0
OTU1956	0	7	0	0	16	0	0	0	0	0	0	0	0	0	0	0	0	0	0	0	59	47	102	32	39	72	26	64	149	121	39	0	88	0	15	114	52	100	77	125	0	0	0	0	0	0	0	0	0
OTU1957	0	0	0	0	0	0	0	0	0	0	0	9	61	0	29	0	0	0	33	41	0	7	0	0	0	0	0	0	0	0	0	0	0	0	0	0	0	0	0	0	0	0	0	0	0	0	0	0	0
OTU1958	0	0	0	0	0	0	0	0	0	0	0	0	0	0	0	0	0	0	0	0	0	6	0	9	0	0	0	0	0	7	15	0	0	0	0	0	0	0	8	0	0	0	0	0	0	0	0	0	0
OTU1959	0	0	0	0	0	0	0	0	7	0	0	0	0	0	0	0	0	0	0	0	0	22	0	0	0	0	34	0	0	0	0	0	71	0	0	0	0	32	0	0	0	0	29	0	37	62	0	0	0
OTU1960	0	0	0	0	59	0	0	0	0	0	0	0	0	34	0	0	0	0	0	6	0	24	0	23	0	22	0	13	18	43	0	0	0	50	0	0	12	18	41	0	0	0	8	11	0	0	0	0	0
OTU1961	0	0	0	0	0	0	0	0	0	0	0	0	0	0	0	0	0	0	0	0	0	0	0	0	0	0	11	8	0	0	0	0	0	0	0	0	0	0	0	15	0	0	0	0	0	0	0	0	0
OTU1962	0	0	0	0	0	0	0	0	0	0	0	0	0	0	0	0	0	0	0	0	0	0	0	0	0	0	0	0	0	0	0	0	0	0	0	0	0	0	0	0	0	0	0	0	0	0	0	0	0
OTU1963	0	0	0	0	0	0	0	0	0	0	0	0	0	0	0	0	0	0	0	0	0	0	0	0	27	0	0	0	0	0	0	0	0	0	0	0	26	29	0	0	0	0	0	0	0	0	0	0	0
OTU1964	0	0	0	0	0	0	0	0	0	0	0	0	0	0	0	0	0	0	0	0	0	10	0	0	7	0	0	0	0	8	0	0	13	10	0	0	0	0	0	0	0	0	0	0	0	0	0	0	0
OTU1965	0	0	0	0	0	0	0	0	0	0	75	0	0	0	0	0	0	0	0	0	0	0	10	12	0	0	24	18	0	19	17	0	16	0	0	0	0	0	0	0	0	0	37	8	0	85	31	0	0
OTU1966	0	0	0	0	0	0	0	0	0	0	0	0	0	22	0	0	0	0	0	0	46	0	0	54	0	0	116	66	30	103	47	0	43	49	48	0	28	0	0	48	0	0	0	0	0	0	0	0	0
OTU1967	0	0	0	0	0	0	0	0	0	0	0	0	0	0	0	0	0	0	0	0	0	0	0	0	0	0	0	0	21	0	12	0	0	0	0	0	0	0	0	0	0	0	0	0	0	0	0	0	0
OTU1968	0	0	0	0	0	0	0	0	0	0	0	0	0	0	0	0	0	0	0	0	0	0	0	0	0	0	0	0	0	8	11	0	19	7	0	0	0	0	0	0	0	0	0	0	0	0	0	0	0
OTU1969	0	0	0	0	0	0	0	0	0	0	0	0	0	0	0	0	0	0	0	0	0	0	0	0	0	0	0	0	0	0	0	0	0	0	0	0	0	0	0	0	0	0	0	0	0	25	0	0	0
OTU1970	0	0	0	0	0	0	0	0	0	0	0	0	0	0	0	0	0	0	0	0	0	5	0	0	0	0	0	7	0	0	0	0	0	0	0	0	0	0	0	0	0	0	0	0	0	0	0	0	0
OTU1971	0	0	0	0	0	0	0	0	0	0	0	0	0	24	0	0	0	0	0	33	47	39	0	0	0	47	36	0	0	0	0	0	29	27	20	0	29	34	0	23	0	0	0	0	0	0	0	0	0
OTU1972	0	0	0	0	7	0	0	17	0	0	0	26	0	0	0	0	15	0	0	16	0	0	0	4	0	0	0	5	0	0	0	0	0	0	0	4	10	9	0	3	0	0	0	0	0	0	0	0	0
OTU1973	0	0	0	0	0	0	0	0	0	0	0	0	0	0	0	0	0	0	0	0	0	9	6	0	0	3	0	0	0	0	0	0	0	0	0	0	0	0	0	0	0	0	0	30	0	0	0	0	0
OTU1974	0	0	0	0	0	0	0	0	0	0	0	0	0	0	0	0	0	0	0	0	0	0	0	0	0	0	0	0	0	0	0	0	0	0	0	13	7	0	0	0	0	0	0	0	0	0	0	0	0
OTU1975	0	0	0	0	0	0	0	0	0	0	0	0	0	0	0	0	0	0	0	0	0	7	24	0	0	0	3	0	0	0	0	0	0	0	0	0	0	0	0	0	6	0	0	0	0	0	0	0	0
OTU1976	0	0	0	0	0	0	0	0	0	12	0	0	0	0	0	0	0	0	0	0	0	0	0	0	0	0	0	0	0	0	0	0	0	0	0	0	17	0	0	0	0	47	0	58	0	0	0	0	0
OTU1977	55	60	0	0	41	22	0	0	0	0	0	42	118	0	62	0	0	0	61	37	34	25	29	27	7	34	64	31	33	23	20	46	33	19	29	0	26	34	27	51	0	0	18	0	24	0	0	15	71
OTU1978	0	0	0	0	0	0	0	0	0	0	0	0	0	11	0	0	0	0	0	0	0	0	0	0	0	0	0	0	0	37	0	8	0	0	0	0	0	0	0	0	0	0	0	0	0	0	0	0	0
OTU1979	0	0	0	0	0	0	0	0	0	0	0	0	43	0	0	0	0	0	0	0	0	0	0	0	0	0	0	0	0	0	0	0	0	0	0	0	0	0	0	0	0	0	8	0	0	0	0	0	0
OTU1980	0	0	0	0	0	0	0	0	0	0	0	0	0	0	0	0	0	0	0	0	0	0	0	0	34	0	0	0	26	0	15	0	0	20	0	0	9	0	0	13	0	0	0	0	0	0	0	0	0
OTU1981	0	0	0	0	0	0	0	0	0	0	0	0	0	0	0	0	0	0	0	0	57	11	0	0	0	0	26	7	0	16	19	0	0	0	0	0	5	16	0	48	0	0	0	0	0	0	0	0	0
OTU1982	0	0	0	0	0	0	0	0	0	0	0	0	0	0	0	0	0	0	0	0	0	0	0	0	0	0	0	0	0	0	71	0	0	0	0	0	0	0	0	0	0	0	0	0	0	139	0	0	8
OTU1983	0	0	0	0	0	0	0	0	0	0	0	0	0	0	0	0	0	0	0	0	0	11	0	0	0	0	13	0	14	0	11	9	10	11	0	13	20	0	0	0	0	0	0	0	0	0	0	0	0
OTU1984	0	0	0	0	0	0	0	0	0	0	0	0	30	0	0	0	0	0	0	0	0	0	0	0	0	0	0	0	0	0	0	0	0	0	0	0	0	0	0	0	0	0	0	0	0	0	0	0	0
OTU1985	0	0	0	0	0	0	0	0	10	0	17	41	0	0	0	0	0	0	0	0	0	0	0	0	0	3	0	0	0	0	0	0	0	0	0	0	0	0	0	0	0	0	0	0	0	0	0	0	0
OTU1986	10	0	0	0	0	8	0	7	0	19	0	0	0	0	29	0	0	21	17	0	0	9	22	0	6	11	16	9	8	11	6	22	0	17	15	13	10	30	17	15	0	0	15	0	0	0	0	0	0
OTU1987	0	0	0	0	0	0	0	0	0	0	166	0	0	149	77	0	0	0	120	31	11	35	41	0	22	47	39	15	33	49	50	0	10	49	23	83	0	43	14	16	8	96	61	34	36	0	0	0	45
OTU1988	0	13	0	0	0	0	0	0	0	7	0	0	0	0	0	0	0	0	0	0	19	0	0	0	0	0	0	0	0	12	0	0	0	0	0	0	0	0	0	0	0	0	0	0	16	0	0	0	0
OTU1989	0	0	0	0	0	0	0	0	0	0	0	0	0	0	0	0	0	0	0	0	0	0	0	0	0	0	0	0	0	0	0	0	0	0	0	8	0	0	11	0	0	0	0	0	0	0	0	0	0
OTU1990	0	0	0	0	0	0	0	0	0	0	0	0	42	0	0	0	8	0	27	0	0	0	13	20	9	0	0	0	0	0	0	14	16	10	0	0	0	0	0	33	0	0	0	0	0	0	0	0	0
OTU1991	0	0	0	0	0	0	0	0	0	0	0	0	0	0	0	0	0	0	0	0	10	12	0	0	16	0	0	7	0	5	0	7	0	17	4	0	0	0	7	0	0	0	0	0	0	0	0	0	0
OTU1992	0	0	0	0	0	0	0	0	0	0	0	0	0	0	0	0	0	0	0	0	0	0	0	0	0	0	0	0	0	0	0	0	0	0	0	0	0	0	0	0	0	9	0	53	0	0	19	7	0
OTU1993	0	0	0	0	0	0	0	0	0	0	0	0	0	0	0	0	0	0	0	0	10	0	0	0	0	0	0	0	0	0	0	9	0	0	16	10	9	0	18	15	0	0	0	0	0	0	0	0	0
OTU1994	0	0	0	0	0	0	0	0	0	0	0	0	0	0	0	0	0	0	0	0	0	0	0	0	0	0	0	0	0	0	0	8	0	9	0	0	0	9	0	0	0	0	0	0	0	0	0	0	0
OTU1995	0	0	0	0	0	0	0	0	0	40	0	0	0	0	0	4	0	0	0	0	0	0	0	4	0	0	0	0	0	29	0	58	0	5	0	0	0	0	0	0	0	0	8	0	0	0	5	0	41
OTU1996	0	0	0	0	0	0	0	0	0	0	0	0	0	0	0	0	0	0	0	0	0	10	0	22	0	0	0	0	0	11	0	0	8	0	0	0	0	0	0	0	0	0	0	0	0	0	0	0	14
OTU1997	0	0	0	0	0	0	0	0	0	0	0	0	0	0	0	0	0	6	0	0	0	0	0	0	0	0	0	0	0	0	0	0	0	0	0	0	0	0	0	0	0	0	0	0	0	0	0	0	0
OTU1998	0	0	0	0	0	0	0	0	0	0	0	0	0	0	0	0	0	0	0	0	10	0	10	0	0	0	0	9	0	11	0	0	0	0	0	0	9	0	0	0	0	0	0	0	0	0	0	0	0
[truncated: 1,222 more rows]
[truncated: 32 more columns]

## Sheet: Table_S5
Table S5. The list of the top 20 OTUs in rhizosphere soil at 3 weeks using the Random Forest model.
#OTU ID	Taxomony
OTU1514	p__Bacteroidota; c__Bacteroidia; o__Sphingobacteriales; f__env.OPS_17; g__env.OPS_17
OTU1794	p__Proteobacteria; c__Alphaproteobacteria; o__Micropepsales; f__Micropepsaceae; g__uncultured
OTU3063	p__Patescibacteria; c__Saccharimonadia; o__Saccharimonadales; f__LWQ8; g__LWQ8
OTU1312	p__Verrucomicrobiota; c__Verrucomicrobiae; o__Pedosphaerales; f__Pedosphaeraceae; g__uncultured
OTU2374	p__Acidobacteriota; c__Acidobacteriae; o__PAUC26f; f__PAUC26f; g__PAUC26f; s__uncultured_bacterium
OTU0118	p__Proteobacteria; c__Gammaproteobacteria; o__Burkholderiales; f__Rhodocyclaceae; g__Azoarcus
OTU2869	p__Bacteroidota; c__Bacteroidia; o__Chitinophagales; f__Chitinophagaceae; g__Niastella
OTU1155	p__Planctomycetota; c__Planctomycetes; o__Gemmatales; f__Gemmataceae; g__Gemmata; s__Gemmata_sp.
OTU2263	p__Firmicutes; c__Bacilli; o__Bacillales; f__Bacillaceae; g__Bacillus
OTU0383	p__Firmicutes; c__Bacilli; o__Bacillales; f__Bacillaceae; g__Fictibacillus
OTU1040	p__Hydrogenedentes; c__Hydrogenedentia; o__Hydrogenedentiales; f__Hydrogenedensaceae; g__Hydrogenedensaceae; s__uncultured_bacterium
OTU2006	p__Bdellovibrionota; c__Bdellovibrionia; o__Bacteriovoracales; f__Bacteriovoracaceae; g__Peredibacter; s__Peredibacter_starrii
OTU2974	p__Acidobacteriota; c__Acidobacteriae; o__Acidobacteriales; f__uncultured; g__uncultured
OTU3186	p__Proteobacteria; c__Alphaproteobacteria; o__Sphingomonadales; f__Sphingomonadaceae; g__Sphingomonas
OTU2724	p__Actinobacteriota; c__Thermoleophilia; o__Solirubrobacterales; f__67-14; g__67-14
OTU2351	p__Firmicutes; c__Bacilli; o__Bacillales; f__Bacillaceae; g__Bacillus
OTU0792	p__Myxococcota; c__Polyangia; o__Nannocystales; f__Nannocystaceae
OTU3132	p__Firmicutes; c__Bacilli; o__Thermoactinomycetales; f__Thermoactinomycetaceae; g__Novibacillus; s__Novibacillus_thermophilus
OTU0271	p__Bacteroidota; c__Bacteroidia; o__Flavobacteriales; f__Flavobacteriaceae; g__Flavobacterium; s__Flavobacterium_daejeonense
OTU1687	p__Dependentiae; c__Babeliae; o__Babeliales; f__Vermiphilaceae; g__Vermiphilaceae; s__uncultured_bacterium

## Sheet: Table_S6
Table S6. The list of the top 20 OTUs in rhizosphere soil at 5 weeks using the Random Forest model.
#OTU ID	Taxonomy
OTU0292	d__Bacteria; p__Verrucomicrobiota; c__Verrucomicrobiae; o__Opitutales; f__Opitutaceae; g__IMCC26134
OTU2351	d__Bacteria; p__Firmicutes; c__Bacilli; o__Bacillales; f__Bacillaceae; g__Bacillus
OTU0313	d__Bacteria; p__Planctomycetota; c__Phycisphaerae; o__Tepidisphaerales; f__WD2101_soil_group; g__WD2101_soil_group
OTU1691	d__Bacteria; p__Chloroflexi; c__KD4-96; o__KD4-96; f__KD4-96; g__KD4-96
OTU0202	d__Bacteria; p__Proteobacteria; c__Alphaproteobacteria; o__Rhizobiales; f__Rhizobiaceae; g__Allorhizobium-Neorhizobium-Pararhizobium-Rhizobium
OTU3018	d__Bacteria; p__Nitrospirota; c__Nitrospiria; o__Nitrospirales; f__Nitrospiraceae; g__Nitrospira; s__uncultured_soil
OTU1102	d__Bacteria; p__Firmicutes; c__Bacilli; o__Bacillales; f__Bacillaceae; g__Bacillus
OTU0792	d__Bacteria; p__Myxococcota; c__Polyangia; o__Nannocystales; f__Nannocystaceae
OTU1087	d__Bacteria; p__Firmicutes; c__Bacilli; o__Paenibacillales; f__Paenibacillaceae; g__Cohnella
OTU0918	d__Bacteria; p__Planctomycetota; c__OM190; o__OM190; f__OM190; g__OM190; s__uncultured_bacterium
OTU0872	d__Bacteria; p__Chloroflexi; c__Chloroflexia; o__Chloroflexales; f__Herpetosiphonaceae; g__Herpetosiphon; s__uncultured_bacterium
OTU1196	d__Bacteria; p__Proteobacteria; c__Gammaproteobacteria; o__Burkholderiales; f__Methylophilaceae; g__MM2
OTU1067	d__Bacteria; p__Bdellovibrionota; c__Bdellovibrionia; o__Bdellovibrionales; f__Bdellovibrionaceae; g__Bdellovibrio; s__metagenome
OTU0088	d__Bacteria; p__Proteobacteria; c__Gammaproteobacteria; o__Burkholderiales; f__Burkholderiaceae; g__Cupriavidus
OTU2006	d__Bacteria; p__Bdellovibrionota; c__Bdellovibrionia; o__Bacteriovoracales; f__Bacteriovoracaceae; g__Peredibacter; s__Peredibacter_starrii
OTU2407	d__Bacteria; p__Proteobacteria; c__Alphaproteobacteria; o__Dongiales; f__Dongiaceae; g__Dongia
OTU1745	d__Bacteria; p__Actinobacteriota; c__Actinobacteria; o__Propionibacteriales; f__Nocardioidaceae; g__Nocardioides
OTU0294	d__Bacteria; p__Firmicutes; c__Bacilli; o__Bacillales; f__Bacillaceae; g__Bacillus
OTU2797	d__Bacteria; p__Planctomycetota; c__Planctomycetes; o__Pirellulales; f__Pirellulaceae; g__uncultured; s__metagenome
OTU1657	d__Bacteria; p__Proteobacteria; c__Gammaproteobacteria; o__Burkholderiales; f__Comamonadaceae; g__Variovorax

## Sheet: Table_S7
Table S7. The list of the top 20 OTUs in root endosphere at 3 weeks using the Random Forest model.
#OTU ID	Taxonomy
OTU2152	d__Bacteria; p__Actinobacteriota; c__Actinobacteria; o__Micrococcales; f__Micrococcaceae; g__Micrococcus
OTU1162	d__Bacteria; p__Firmicutes; c__Incertae_Sedis; o__DTU014; f__DTU014; g__DTU014; s__anaerobic_digester
OTU0840	d__Bacteria; p__Firmicutes; c__Bacilli; o__Thermoactinomycetales; f__Thermoactinomycetaceae; g__Planifilum
OTU2352	d__Bacteria; p__Proteobacteria; c__Gammaproteobacteria; o__Pseudomonadales; f__Pseudomonadaceae; g__Pseudomonas
OTU0512	d__Bacteria; p__Proteobacteria; c__Alphaproteobacteria; o__Sphingomonadales; f__Sphingomonadaceae; g__Sphingobium
OTU2182	d__Bacteria; p__Firmicutes; c__Bacilli; o__Alicyclobacillales; f__Alicyclobacillaceae; g__Tumebacillus
OTU1805	d__Bacteria; p__Proteobacteria; c__Gammaproteobacteria; o__Burkholderiales; f__Methylophilaceae; g__Methylophilus
OTU0587	Unassigned
OTU0383	d__Bacteria; p__Firmicutes; c__Bacilli; o__Bacillales; f__Bacillaceae; g__Fictibacillus
OTU3200	d__Bacteria; p__Proteobacteria; c__Alphaproteobacteria; o__Ferrovibrionales; f__Ferrovibrionaceae; g__Ferrovibrio; s__Phaeospirillum_sp.
OTU3132	d__Bacteria; p__Firmicutes; c__Bacilli; o__Thermoactinomycetales; f__Thermoactinomycetaceae; g__Novibacillus; s__Novibacillus_thermophilus
OTU0550	d__Bacteria; p__Proteobacteria; c__Gammaproteobacteria; o__Burkholderiales; f__Oxalobacteraceae; g__Pseudoduganella
OTU1095	d__Bacteria; p__Firmicutes; c__Bacilli; o__Alicyclobacillales; f__Alicyclobacillaceae; g__Tumebacillus; s__uncultured_Alicyclobacillaceae
OTU2310	d__Bacteria; p__Firmicutes; c__Bacilli; o__Thermoactinomycetales; f__Thermoactinomycetaceae; g__Planifilum; s__Planifilum_composti
OTU2707	d__Bacteria; p__Firmicutes; c__Limnochordia; o__Limnochordia; f__Limnochordia; g__Hydrogenispora; s__uncultured_Clostridia
OTU0985	d__Bacteria; p__Firmicutes; c__Bacilli; o__Brevibacillales; f__Brevibacillaceae; g__Brevibacillus
OTU0294	d__Bacteria; p__Firmicutes; c__Bacilli; o__Bacillales; f__Bacillaceae; g__Bacillus
OTU2066	d__Bacteria; p__Proteobacteria; c__Gammaproteobacteria; o__Enterobacterales; f__Enterobacteriaceae; g__Escherichia-Shigella
OTU0829	d__Bacteria
OTU0616	d__Bacteria; p__Actinobacteriota; c__Actinobacteria; o__Propionibacteriales; f__Propionibacteriaceae; g__Cutibacterium

## Sheet: Table_S8
Table S8. The list of the top 20 OTUs in root endosphere at 5 weeks using the Random Forest model.
#OTU ID	Taxonomy
OTU3022	d__Bacteria; p__Halanaerobiaeota; c__Halanaerobiia; o__Halanaerobiales; f__Halanaerobiaceae; g__Halocella; s__uncultured_bacterium
OTU0262	d__Bacteria; p__Planctomycetota; c__Planctomycetes; o__Pirellulales; f__Pirellulaceae; g__Pir4_lineage; s__uncultured_Planctomycetaceae
OTU1692	d__Bacteria; p__Actinobacteriota; c__Actinobacteria; o__Propionibacteriales; f__Nocardioidaceae; g__Nocardioides
OTU1367	d__Bacteria; p__Firmicutes; c__Bacilli; o__Thermoactinomycetales; f__Thermoactinomycetaceae; g__Thermoflavimicrobium; s__uncultured_Thermoflavimicrobium
OTU0472	d__Bacteria; p__Proteobacteria; c__Gammaproteobacteria; o__Burkholderiales; f__Methylophilaceae; g__Methylobacillus; s__uncultured_soil
OTU2694	d__Bacteria; p__Proteobacteria; c__Alphaproteobacteria; o__Rhizobiales; f__Xanthobacteraceae
OTU1505	d__Bacteria; p__Proteobacteria; c__Alphaproteobacteria; o__Sphingomonadales; f__Sphingomonadaceae; g__Sphingobium; s__Sphingobium_herbicidovorans
OTU0513	d__Bacteria; p__Verrucomicrobiota; c__Chlamydiae; o__Chlamydiales
OTU1098	d__Bacteria; p__Verrucomicrobiota; c__Verrucomicrobiae; o__Pedosphaerales; f__Pedosphaeraceae; g__uncultured
OTU2137	d__Bacteria; p__Firmicutes; c__Clostridia; o__Clostridiales; f__Clostridiaceae; g__Clostridium_sensu_stricto_8; s__uncultured_bacterium
OTU0349	d__Bacteria; p__Firmicutes; c__Bacilli; o__Bacillales; f__Bacillaceae; g__Bacillaceae; s__uncultured_Bacillus
OTU1627	d__Bacteria; p__Proteobacteria; c__Alphaproteobacteria; o__Dongiales; f__Dongiaceae; g__Dongia; s__Dongia_rigui
OTU1812	d__Bacteria; p__Proteobacteria; c__Alphaproteobacteria; o__Caulobacterales; f__Caulobacteraceae; g__Brevundimonas
OTU2351	d__Bacteria; p__Firmicutes; c__Bacilli; o__Bacillales; f__Bacillaceae; g__Bacillus
OTU0065	d__Bacteria; p__Firmicutes; c__Bacilli; o__Bacillales; f__Bacillaceae; g__Halobacillus; s__uncultured_bacterium
OTU2485	d__Bacteria; p__Bacteroidota; c__Bacteroidia; o__Flavobacteriales; f__Flavobacteriaceae; g__Flavobacterium
OTU2263	d__Bacteria; p__Firmicutes; c__Bacilli; o__Bacillales; f__Bacillaceae; g__Bacillus
OTU0039	d__Bacteria; p__Firmicutes; c__Bacilli; o__Bacillales; f__Bacillaceae; g__Bacillus
OTU1296	d__Bacteria; p__Firmicutes; c__Bacilli; o__Bacillales; f__Bacillaceae
OTU0867	d__Bacteria; p__Firmicutes; c__Bacilli; o__Bacillales; f__Planococcaceae; g__Paenisporosarcina; s__Sporosarcina_sp.

## Sheet: Table_S9
Table S9. A summary of the sequencing statistics of metatranscriptome libraries
Sample*	Total reads	Read length (bp)	Library size (Gbp)	GC contents (%)	Average Phred score
Treatment 1	44056868	251×2	11.0583	51	38
Treatment 2	34134198	251×2	8.56768	52	38
Treatment 3	43434032	251×2	10.9019	52	38
Control 1	50095310	251×2	12.5739	52	38
Control 2	42600548	251×2	10.6927	53	38
Control 3	45733176	251×2	11.479	51	38
*Treatment 1–3: TCH3-2–inoculated rhizosphere soil from tomato plants grown in upland soil. Control 1–3: SDW-treated rhizosphere soil from tomato plants grown in upland soil.

## Sheet: Table_S10
Table S10. A summary of reads in pre-processing steps of metatranscriptome libraries
Sample*	Direction	Total reads	Trimming	Filtering	Removing rRNA	Removing tRNA	Pairing
Treatment 1	R1	22028434	21342325	21005513	7109656	7103133	6992516
	R2	22028434	21341989	21020971	7108919	7102463	6992516
Treatment 2	R1	17067099	16701477	16558977	4247366	4242964	4180984
	R2	17067099	16701885	16487050	4223157	4218745	4180984
Treatment 3	R1	21717016	20244932	20056044	5027257	5022038	4935764
	R2	21717016	20253432	19915750	4986248	4981071	4935764
Control 1	R1	25047655	24730439	24467309	6733721	6727238	6634560
	R2	25047655	24731900	24417741	6711954	6705501	6634560
Control 2	R1	21300274	20826464	20637548	7831493	7822758	7693233
	R2	21300274	20828444	20493658	7763876	7755198	7693233
Control 3	R1	22866588	22628279	22399476	6435779	6423981	6341953
	R2	22866588	22628678	22352384	6417554	6405848	6341953
*Treatment 1–3: TCH3-2–inoculated rhizosphere soil from tomato plants grown in upland soil. Control 1–3: SDW-treated rhizosphere soil from tomato plants grown in upland soil.

[truncated: 15 more sheets: Table_S11, Table_S12, Table_S13, Table_S14, Table_S15, Table_S16, Table_S17, Table_S18, Table_S19, Table_S20, Table_S21, Table_S22, Table_S23, Table_S24, Table_S25]
